# Supplementary material
Source: PubMed Central journal article supplement (PMC5221692)
Supplement: NIHMS835962-supplement-1.pdf [file NIHMS835962-supplement-1.pdf]

# Unexpected changes in the population of coordination isomers for the lanthanide ion complexes of DOTMA-tetraglycinate

Cemile Kumas,<sup>†</sup> W. Shirangi Fernando,<sup>†</sup> Piyu Zhao,<sup>†</sup> Martín Regueiro-Figueroa,<sup>‡</sup> Garry E. Kiefer,<sup>†§</sup>

André F. Martins,<sup>†</sup> Carlos Platas-Iglesias,<sup>‡</sup> and A. Dean Sherry<sup>†‡\*</sup>

<sup>†</sup> Department of Chemistry, University of Texas at Dallas, 800 W Campbell Rd, Richardson TX

75083-3021

[sherry@utdallas.edu](mailto:sherry@utdallas.edu)

<sup>‡</sup> Macrocylics, Inc., Dallas, Texas.

<sup>§</sup> Centro de Investigaciones Científicas Avanzadas (CICA) and Departamento de Química Fundamental,

Universidade da Coruña, Campus da Zapateira, Rúa da Fraga 10, 15008 A Coruña, Spain.

<sup>‡</sup> Advanced Imaging Research Center and Department of Radiology, University of Texas

Southwestern Medical Center, Dallas, TX 75390-8568

[dean.sherry@utsouthwestern.edu](mailto:dean.sherry@utsouthwestern.edu)

## Supporting Information

### HPLC profiles

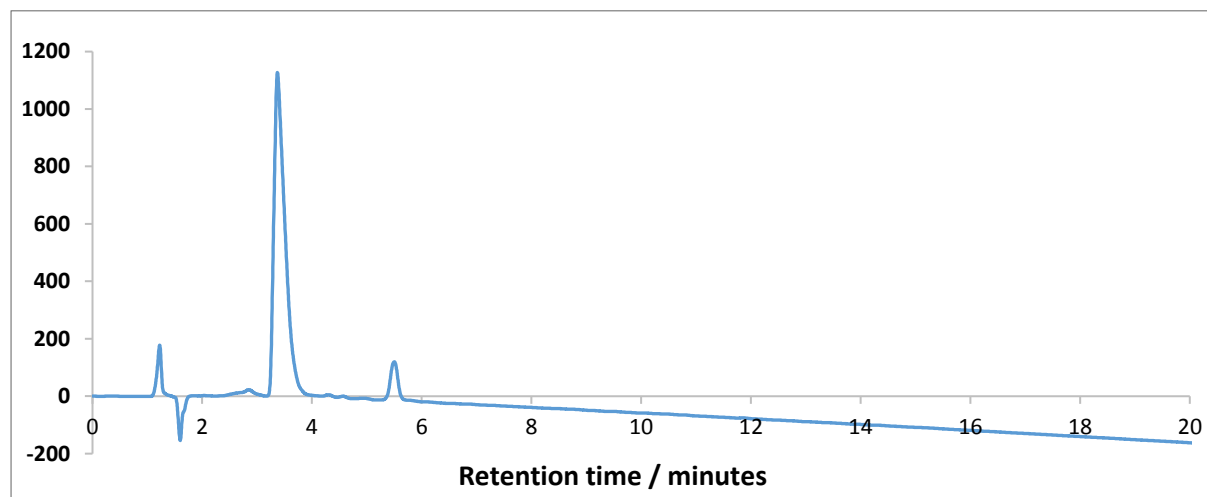

**Figure S1:** Analytical HPLC profile for DOTMA-Gly<sub>4</sub> (scheme 1); solvent gradient conditions - 98% Water (1% TFA); 2% ACN to 40% water (1% TFA); 60% ACN in 30 min, 215 nm.

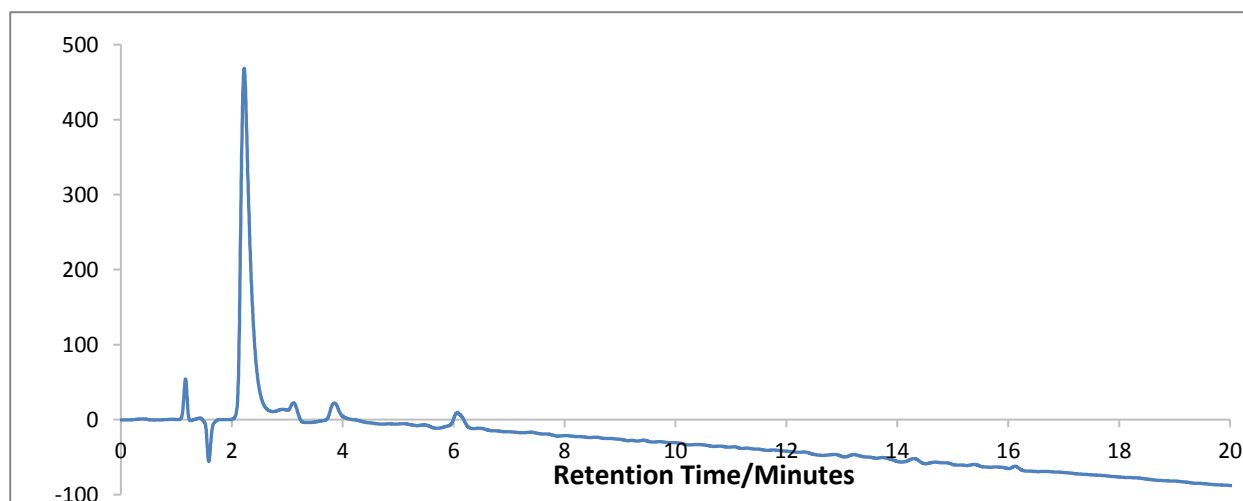

**Figure S2:** Analytical HPLC profile for ErDOTMA-Gly<sub>4</sub>; solvent gradient conditions - 98% Water (1% TFA); 2% ACN to 40% water (1% TFA); 60% ACN in 30 min.

**NMR Measurements** <sup>1</sup>H NMR spectra and CEST spectra were recorded on a 400 MHz Bruker Avance III spectrometer. High resolution <sup>1</sup>H NMR samples were prepared either in D<sub>2</sub>O or H<sub>2</sub>O. Samples for studies were prepared by dissolving the appropriate amount of agent in water and the pH was adjusted to neutral pH.

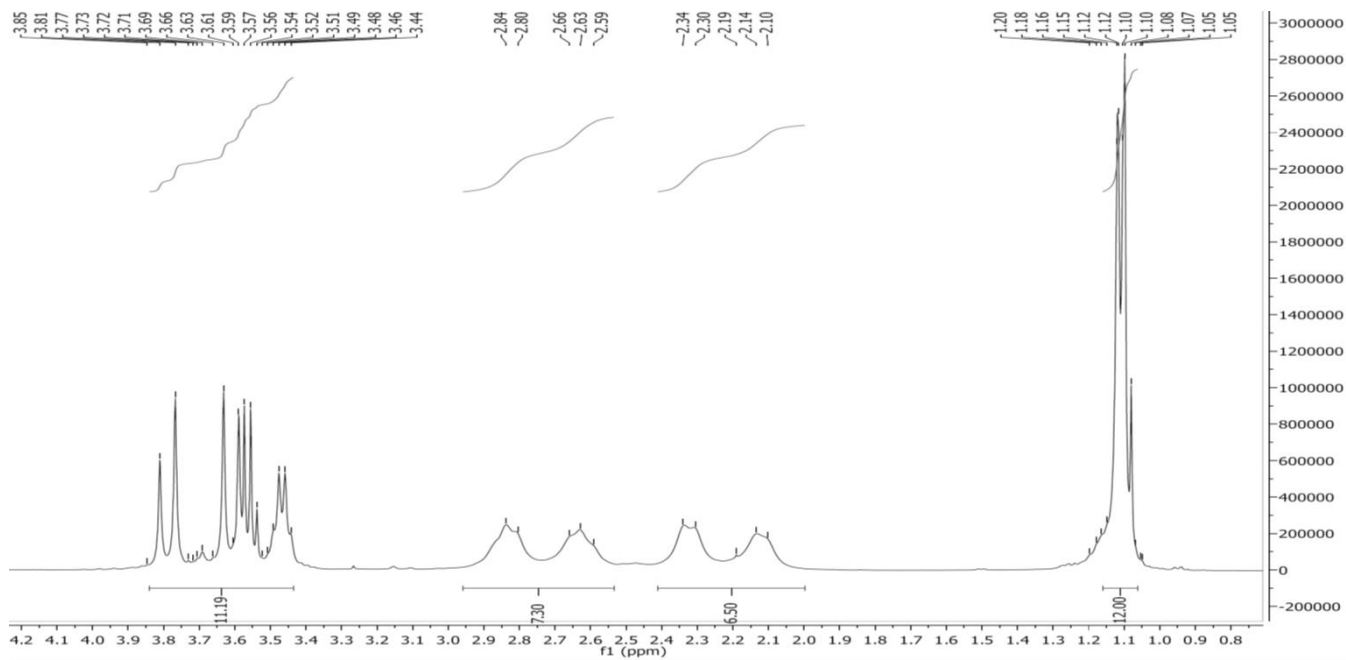

**Figure S3.**  $^1\text{H}$  NMR spectra of the ethyl ester of DOTMA-(gly) $_4$ .

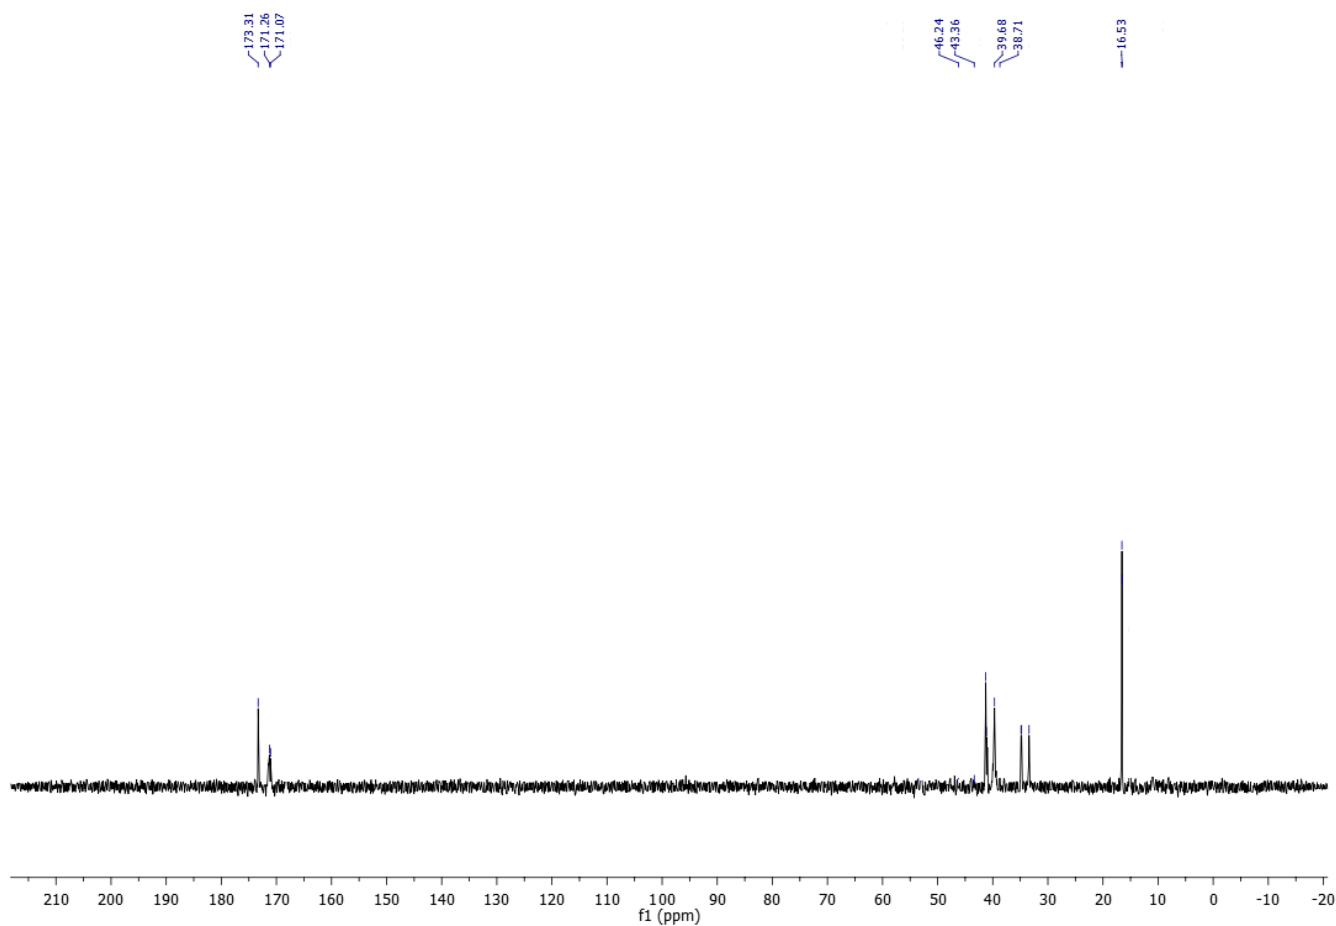

**Figure S4.**  $^{13}\text{C}$  NMR spectra of the ethyl ester of DOTMA-(gly) $_4$ .

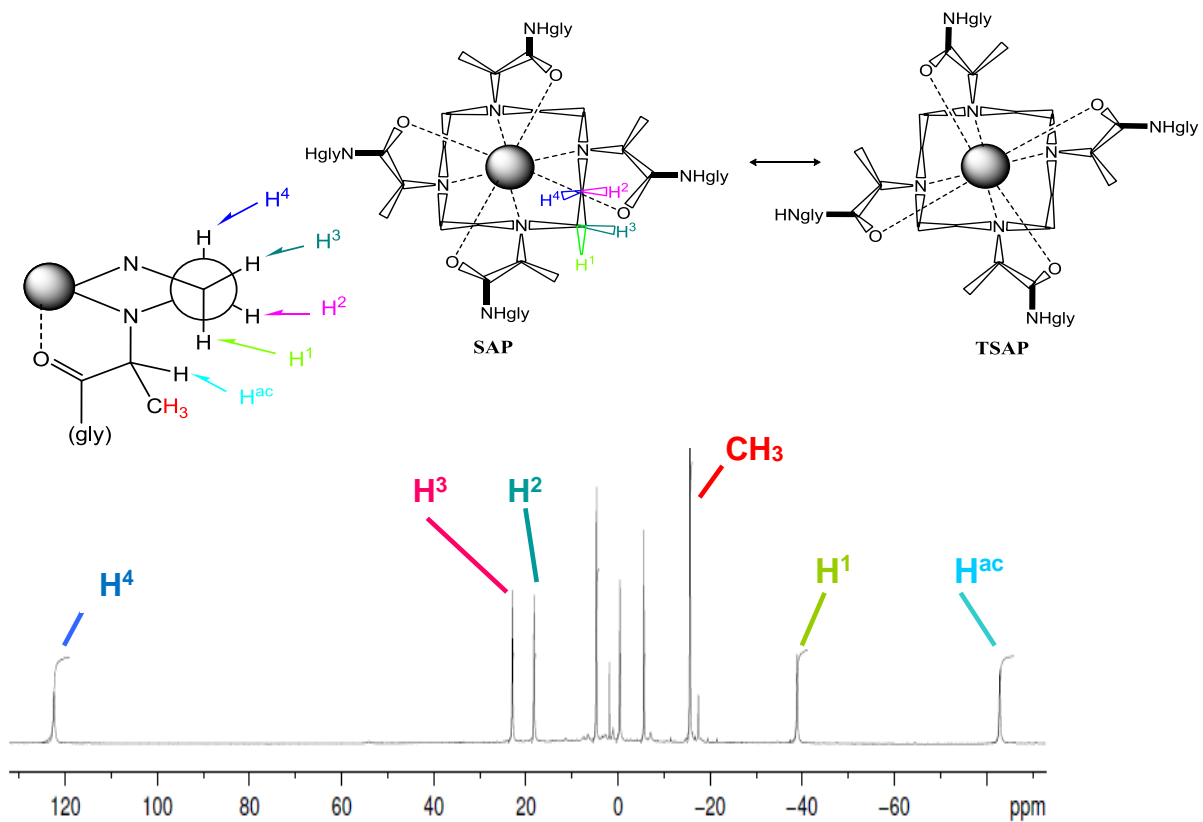

**Figure S5. Top:** A description of lanthanide coordination in the SAP and TSAP geometry isomers of the macrocyclic ring protons in the LnDOTMA-(gly)<sub>4</sub> complexes. **Bottom:** Assignment of the peaks in the <sup>1</sup>H NMR spectrum of YbDOTMA-(gly)<sub>4</sub>. The spectrum was recorded in H<sub>2</sub>O at 298 K (pH 7.4). The notation scheme H<sup>1</sup> and H<sup>4</sup> for *axial* protons, H<sup>2</sup> and H<sup>3</sup> for *equatorial* protons of macrocyclic ring and H<sup>ac</sup> for an acetamide proton was used.

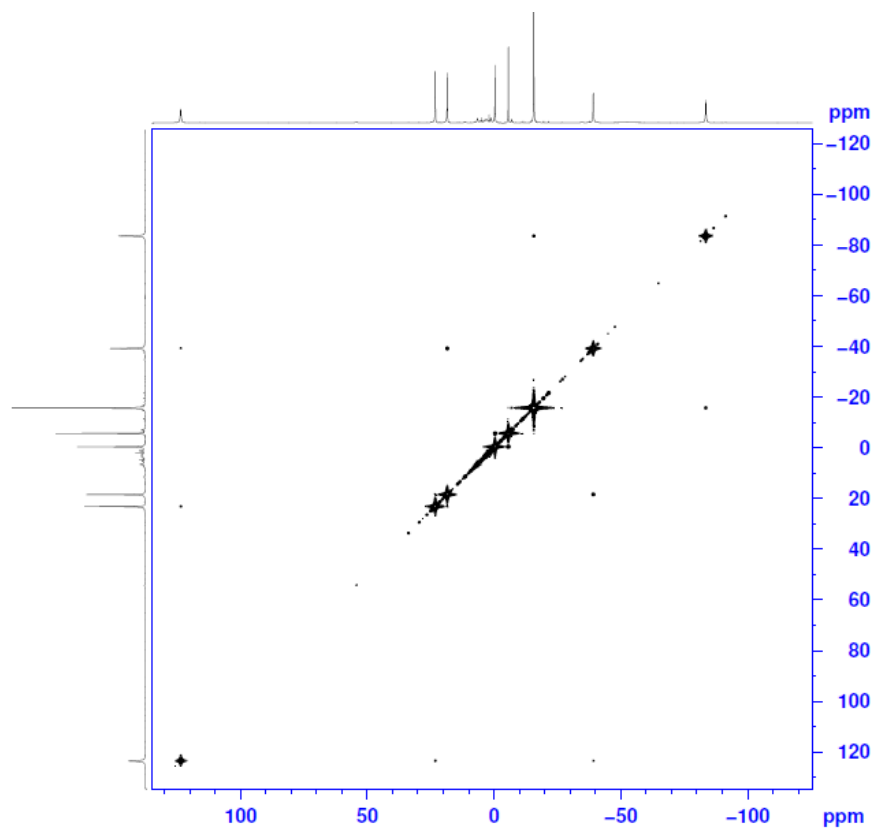

**Figure S6.**  $^1\text{H}$  COSY spectrum of  $\text{YbDOTMA}-(\text{gly})_4$  recorded at 400 MHz and 298 K in  $\text{D}_2\text{O}$  (pD 7.4).

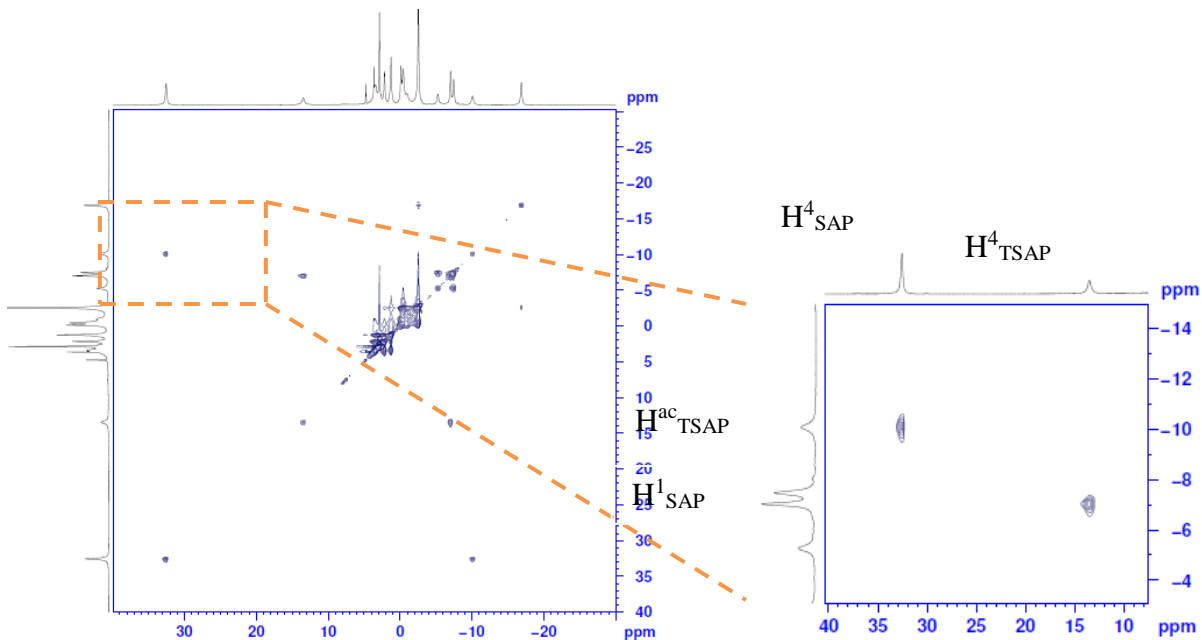

**Figure S7.**  $^1\text{H}$  EXSY spectrum of  $\text{EuDOTMA}-(\text{gly})_4$  recorded at 400 MHz and 298 K in  $\text{D}_2\text{O}$  (pD 7.4). EXSY spectrum shows the SAP and TSAP transition of cyclen protons.

$\text{CH}_3$

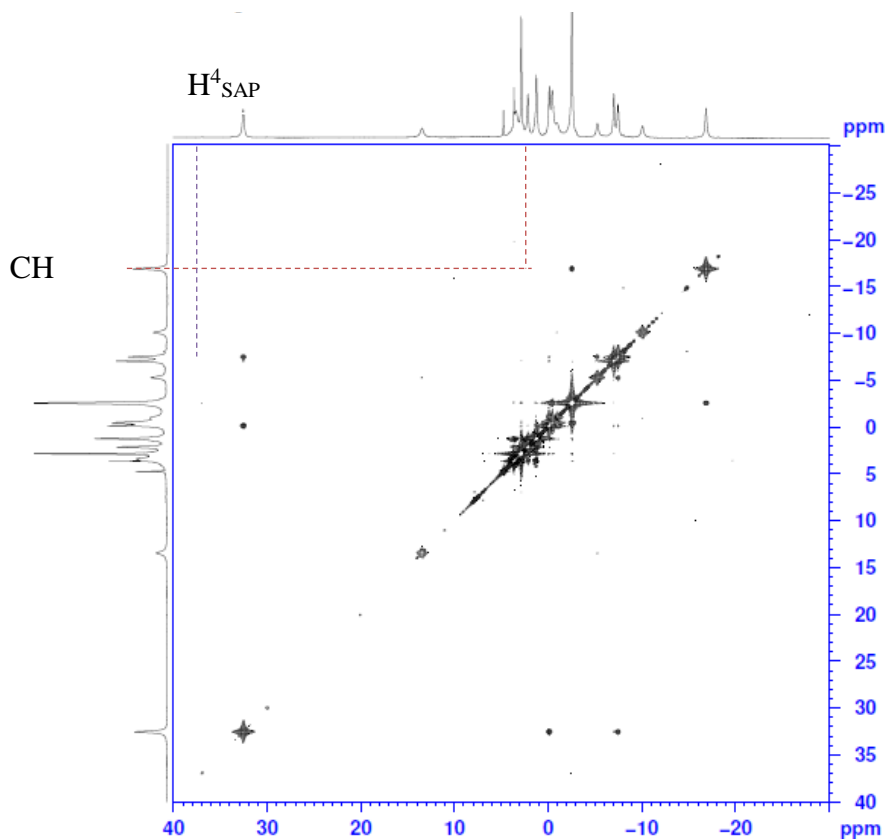

**Figure S8.**  $^1\text{H}$  COSY spectrum of  $\text{EuDOTMA}-(\text{gly})_4$  recorded at 400 MHz and 298 K in  $\text{D}_2\text{O}$  (pD 7.4).

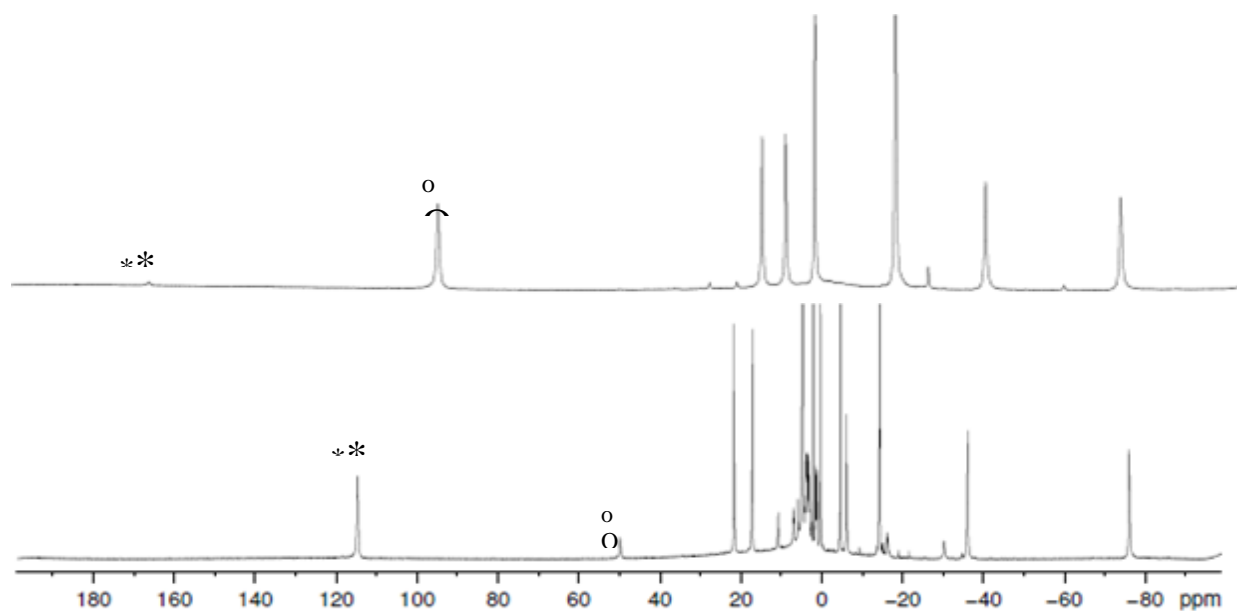

**Figure S9.**  $^1\text{H}$  NMR spectra of  $\text{YbDOTMA}$  (Top) and  $\text{YbDOTMA}-(\text{gly})_4$  (bottom). All spectra were recorded in  $\text{D}_2\text{O}$  at 298 K and 400 MHz. (\*) is denoted for the axial  $\text{H}^4$  protons of the SAP isomer and (o) is for the  $\text{H}^4$  protons of the TSAP isomer.

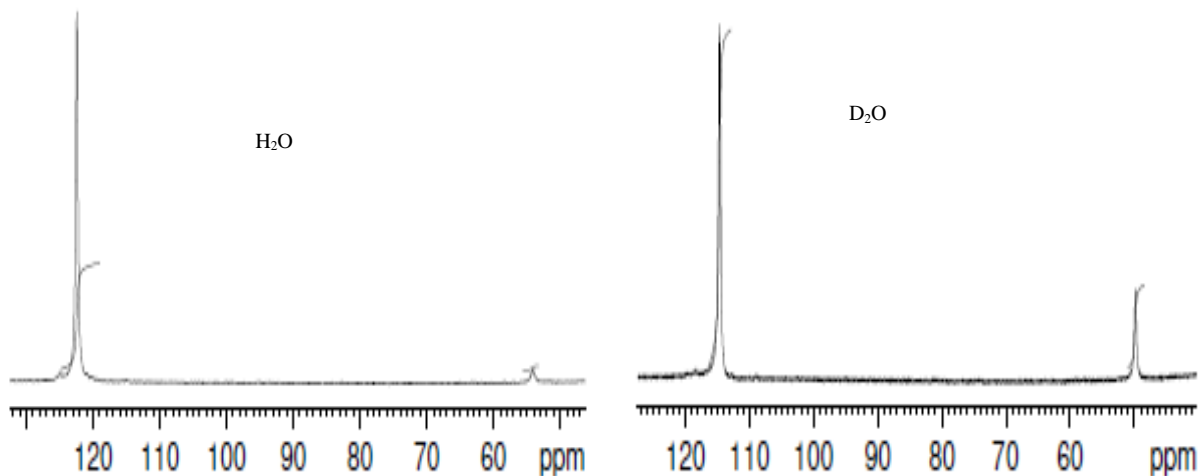

**Figure S10.**  $^1\text{H}$  NMR spectra of YbDOTMA-(gly) $_4$  in  $\text{H}_2\text{O}$  and  $\text{D}_2\text{O}$ , focusing on the highly shifted  $\text{H}^4$  resonances. The most highly shifted downfield resonance in each spectrum corresponds to the SAP isomer. The smaller resonance near 50-55 ppm reflects the TSAP isomer.

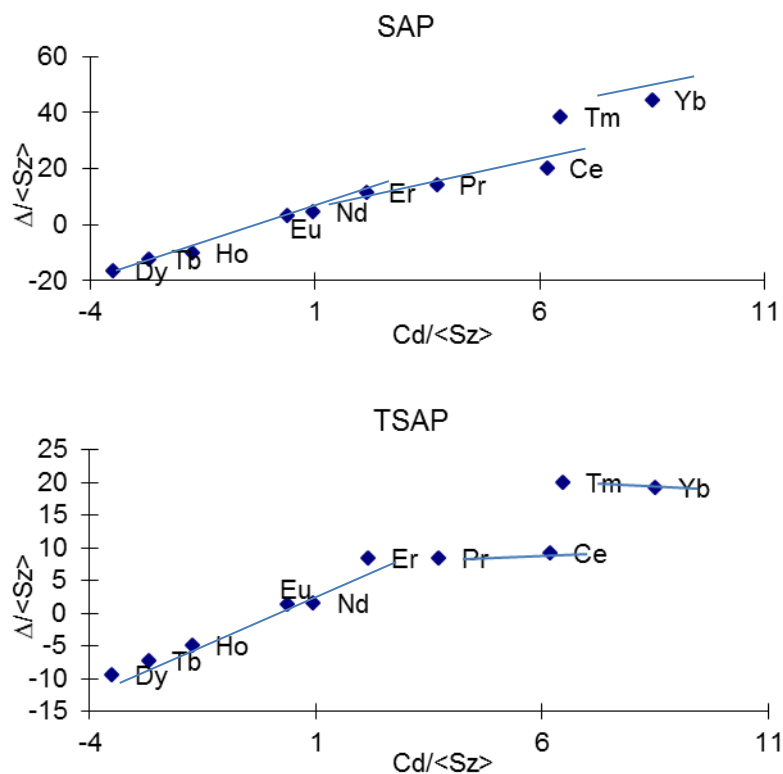

**Figure S11.** Plot of  $\langle S_Z \rangle$  vs  $C_d/\langle S_Z \rangle$  for the axial proton ( $\text{H}^4$ ) of the SAP (left) isomeric forms in DOTMA-(gly) $_4$  chelates.

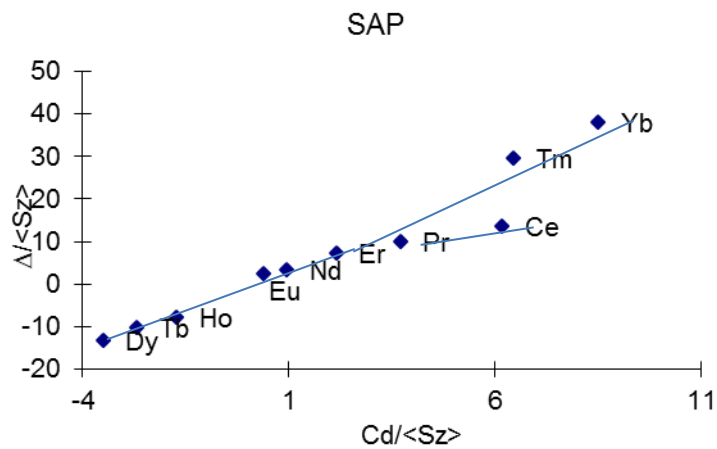

**Figure S12.** Plot of  $\langle S_Z \rangle$  vs  $C_d/\langle S_Z \rangle$  for the axial proton ( $H^4$ ) of the DOTA-(gly)<sub>4</sub> chelates.

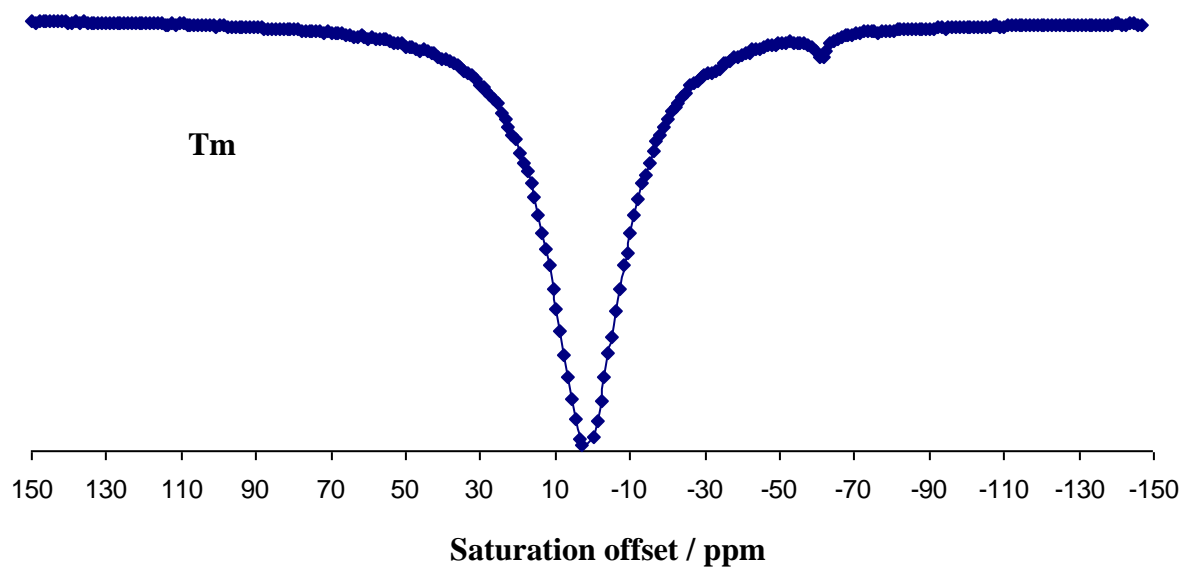

**Figure S13.** CEST spectra of 30 mM TmDOTMA-(gly)<sub>4</sub> complex at  $B_1 = 800$  Hz (90% D<sub>2</sub>O+10% H<sub>2</sub>O, 37°C)



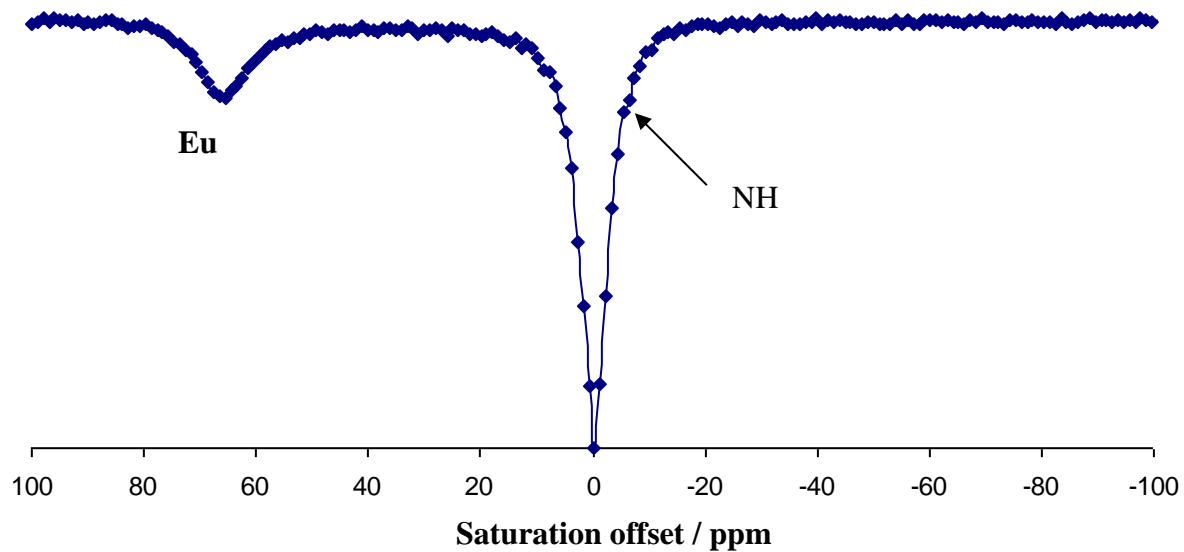

**Figure S14.** CEST spectra of 40 mM EuDOTMA-(gly)<sub>4</sub> complex at B<sub>1</sub>= 400 Hz

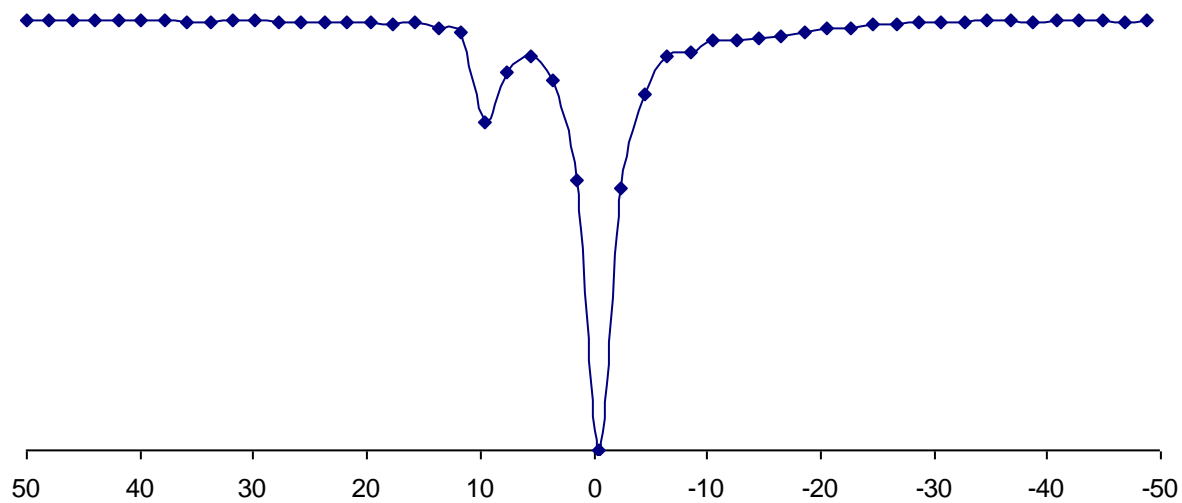

**Figure S15.** CEST spectra of 80mM SmDOTMA-(gly)<sub>4</sub> complex at B<sub>1</sub>= 100 Hz

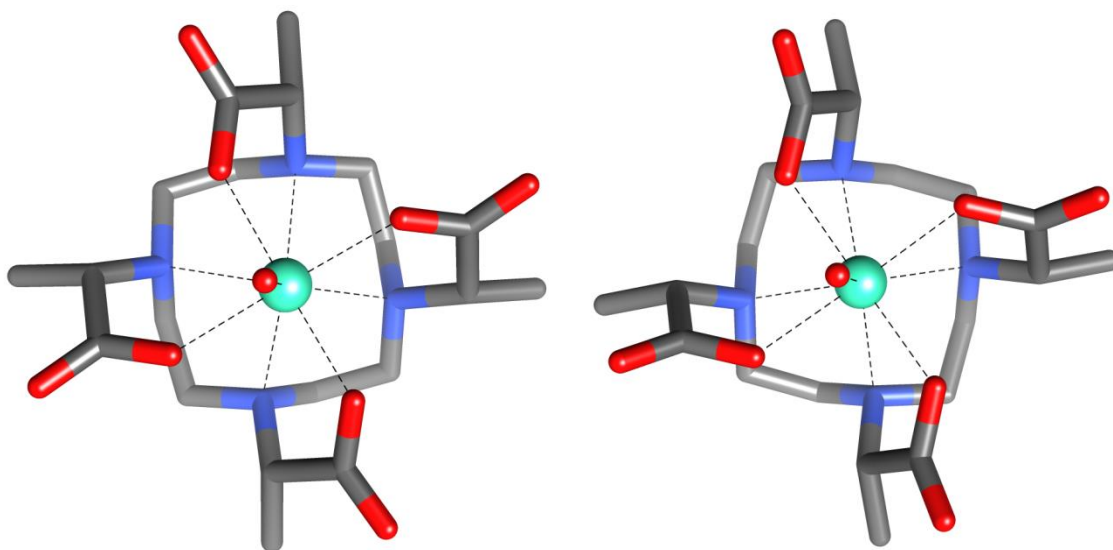

**Figure S16.** Optimized geometry of the SAP (left) and TSAP (right) isomers of  $[\text{Gd}(\text{DOTMA})(\text{H}_2\text{O})]^-$  obtained with DFT calculations performed in aqueous solution at the TPSSh/LCRECP/6-31G(d,p) level. Hydrogen atoms were omitted for simplicity.

**Optimized geometries.** Geometry optimizations of the  $[\text{Gd}(\text{DOTMA})(\text{H}_2\text{O})]^-$  complex provide two energy minima that correspond to the capped square antiprismatic (SAP) and capped twisted-square antiprismatic diastereoisomers (TSAP, Figure S14). The structural parameters calculated both in the gas-phase and in aqueous solution are shown in Table S3. The distances between the  $\text{Gd}^{3+}$  ion and the donor atoms of the ligand calculated for the two isomers are quite similar. As observed previously for related systems, the inclusion of solvent effects (water) provokes an important shortening of the Ln-N distances,<sup>i</sup> which is also reflected in a shortening of the distance between the  $\text{Gd}^{3+}$  ion and the plane defined by the four N atoms of the macrocycle ( $\text{Ln-P}_\text{N}$ ) and a lengthening of the distance to the plane defined by the four O atoms of the ligand coordinated to the metal ion ( $\text{Ln-P}_\text{O}$ ). The structural parameters calculated in aqueous solution for the TSAP isomer present an excellent agreement with the values observed in the X-ray crystal structure reported by Woods et al.<sup>ii</sup> The main discrepancy between

the experimental and calculated geometries concerns the distance between the metal ion and the oxygen atom of the inner-sphere water molecule, which is overestimated by calculations by  $\sim 0.17$  Å. However, this is not surprising considering that the Gd-O<sub>water</sub> distances observed in the solid state have been shown to be very sensitive to the environment of the coordinated water molecule. For instance, the Gd-O<sub>water</sub> distances observed for different salts of the [Gd(DOTAM)(H<sub>2</sub>O)]<sup>3+</sup> complex were shown to differ up to 0.12 Å depending upon the anions present in the crystal lattice.<sup>iii</sup> Furthermore, it has been recently shown that the accurate calculation of accurate Gd-O<sub>water</sub> distances and <sup>17</sup>O hyperfine coupling constants of coordinated water molecules requires the explicit inclusion of at least two second-sphere water molecules.<sup>iv</sup> The Gd-O<sub>water</sub> distances calculated for the SAP isomer are shorter than those obtained for the TSAP one, in line with the faster water exchange rates usually observed for SAP isomers in DOTA-like complexes.<sup>i</sup>

**Table S1.** Geometrical parameters of calculated structures for the two isomers of [Gd(DOTMA)(H<sub>2</sub>O)]<sup>-</sup> and [Gd(DOTMA-gly<sub>4</sub>)(H<sub>2</sub>O)]<sup>-</sup>.<sup>a</sup>

|                                             | DOTMA     |           |           |           |           | DOTMA-gly <sub>4</sub> |           |
|---------------------------------------------|-----------|-----------|-----------|-----------|-----------|------------------------|-----------|
|                                             | SAP       |           | TSAP      |           | TSAP      | SAP                    | TSAP      |
|                                             | Gas-phase | Water     | Gas-phase | Water     | exptl     | Water                  | Water     |
| Gd-N                                        | 2.736(25) | 2.686(10) | 2.756(25) | 2.684(11) | 2.681(23) | 2.670(4)               | 2.689(7)  |
| Gd-O                                        | 2.363(35) | 2.374(23) | 2.367(36) | 2.382(26) | 2.373(18) | 2.399(11)              | 2.402(15) |
| Gd-O <sub>w</sub>                           | 2.565     | 2.616     | 2.556     | 2.671     | 2.500     | 2.520                  | 2.546     |
| $\omega^b$                                  | 39.6(4)   | 38.4(4)   | -28.0(4)  | -26.8(3)  | -26.2(8)  | 38.3(6)                | -25.9(8)  |
| Gd-P <sub>O</sub> <sup>c</sup>              | 0.648     | 0.769     | 0.700     | 0.847     | 0.794     | 0.776                  | 0.871     |
| Gd-P <sub>N</sub> <sup>d</sup>              | 1.702     | 1.611     | 1.755     | 1.630     | 1.663     | 1.572                  | 1.618     |
| P <sub>O</sub> -P <sub>N</sub> <sup>e</sup> | 2.350     | 2.381     | 2.456     | 2.477     | 2.457     | 2.348                  | 2.489     |

<sup>a</sup> Distances (Å); The average values of bond distances to the oxygen atoms of the P<sub>O</sub> (Gd-O) and P<sub>N</sub> (Gd-N) planes are reported with standard deviations within parentheses; O<sub>w</sub>, oxygen atom of the inner-sphere water molecule. <sup>b</sup> Mean twist angle (°) of the upper and lower planes. <sup>c</sup> Distance between the lanthanide and the least-squares plane defined by the coordinated oxygen atoms, P<sub>O</sub>. <sup>d</sup> Distance between the lanthanide and the least-squares plane defined by the nitrogen atoms, P<sub>N</sub>. <sup>e</sup> Distance between the centroids of the P<sub>O</sub> and P<sub>N</sub> planes.

The calculations performed for the  $\text{Gd}^{3+}$  complex were extended to several  $\text{Ln}^{3+}$  ions across the lanthanide series. The average Ln-O and Ln-N distances involving the eight donor atoms of the macrocycle decrease quadratically along the series as a consequence of the lanthanide contraction, in agreement with previous experimental<sup>ii</sup> and theoretical<sup>iii, iv, v</sup> studies.

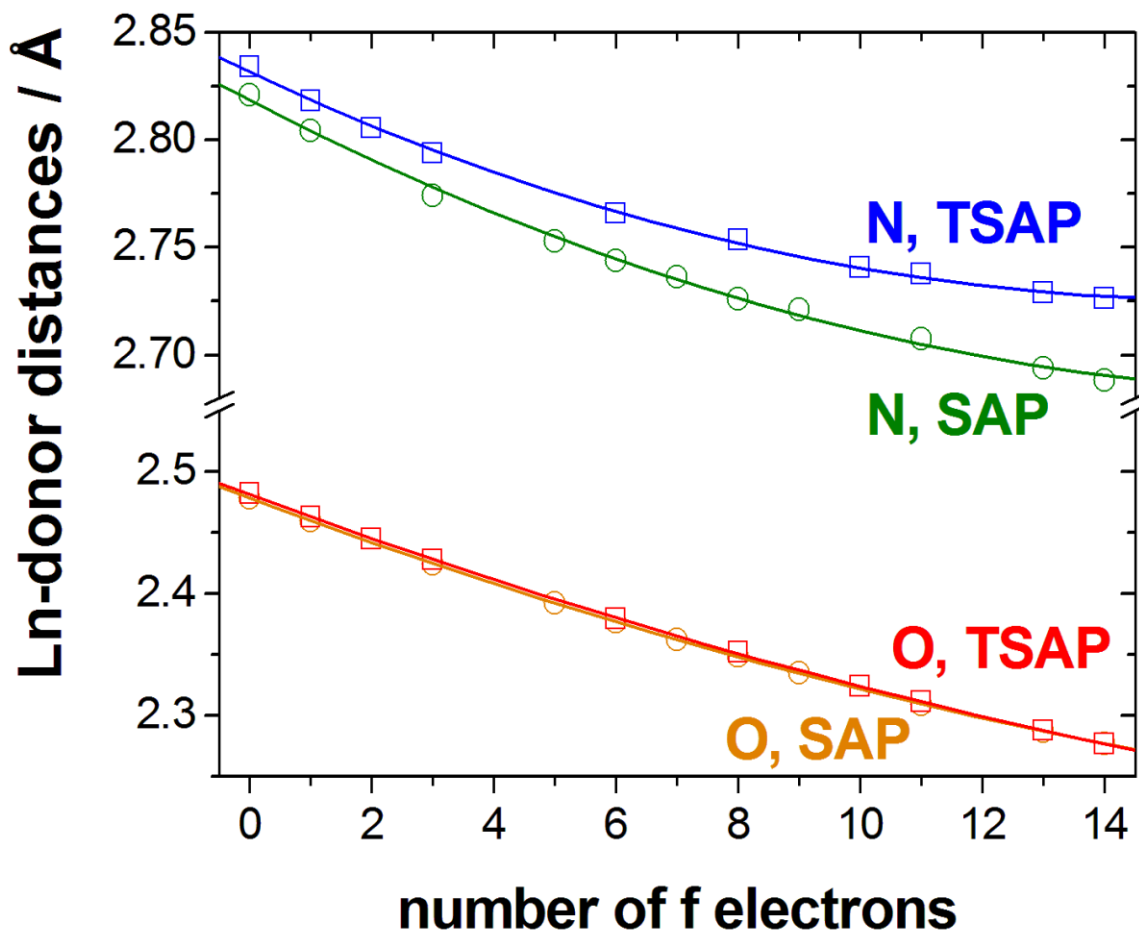

**Figure S17.** Variation of the average Ln-O<sub>amide</sub> and Ln-N distances of the metal coordination environments for the  $[\text{Ln}(\text{DOTMA})(\text{H}_2\text{O})]^-$  complexes at the TPSSh/LCRECP/6-31G(d,p) level (results obtained in the gas-phase). The solid lines represent quadratic fits of the data to  $y = a + bx + cx^2$  with  $R^2 > 0.99$ .

The relative energies of the SAP and TSAP isomers of  $[\text{Ln}(\text{DOTMA})(\text{H}_2\text{O})]^-$  were first investigated in the gas-phase (Figure S16, see also Table S4). According to our calculations the TSAP isomer is

more stable than the SAP one only for the light Ln<sup>3+</sup> ions (Ln = La, Ce), which is in contrast with the experimental evidence. A stabilization of the SAP isomer occurs across the whole lanthanide series from La<sup>3+</sup> to Lu<sup>3+</sup>. To understand the reasons for this trend we calculated the counterpoise-corrected binding energies (BEs) of the ligands, as well as the relative strain energies (SEs) of the macrocyclic ligand across the series (Figure 17, see also Table S4). Our calculations provide positive relative binding energies (R<sub>BE</sub>) calculated as R<sub>BE</sub> = BE<sub>TSAP</sub> - BE<sub>SAP</sub>. The actual binding energies are negative, and therefore a positive binding energy indicates that the binding energy of the ligand is higher in the case of the SAP form, an effect that is magnified across the lanthanide series as the positive charge density of the metal ion increases. On the other hand, the relative strain energies R<sub>SE</sub> = LE<sub>TSAP</sub> - LE<sub>SAP</sub> (LE<sub>TSAP</sub> and LE<sub>SAP</sub> are the ligand energies with the ligand adopting the geometry observed for the TSAP and SAP isomer, respectively) are negative, which indicates that in the SAP isomer the ligand is more strained than in the TSAP form. The R<sub>SE</sub> values do not experience an important variation along the lanthanide series (< 0.5 kcal mol<sup>-1</sup>), while the calculated R<sub>BEs</sub> present a more important variation (~1.76 kcal mol<sup>-1</sup>). The sum of the R<sub>SE</sub> and R<sub>BE</sub> values results in an increased stability of the SAP isomer across the series, as reflected by the relative free energies of the two isomers. Thus, the stabilization of the SAP form across the series is mainly the result of the higher binding energy of the ligand to the metal ion for this isomer, which further increases by increasing metal ion density.<sup>vi, vii</sup>

**Table S2.** Relative free energies ( $\Delta G^\circ$ ) for the SAP  $\rightleftharpoons$  TSAP equilibrium, relative binding energies (BE), relative strain energies of the ligands (SE), and hydration free energies ( $\Delta G^\circ_{\text{hyd}}$ ) (kcal·mol<sup>-1</sup>).

| Ln | $\Delta G^{\text{oa,b}}$ | $\Delta G^{\text{oa,c}}$ | $\Delta G^{\text{oa,d}}$ | R <sub>SE</sub> | R <sub>BE</sub> | $\Delta G^\circ_{\text{hyd(SAP)}}$ | $\Delta G^\circ_{\text{hyd(TSAP)}}$ |
|----|--------------------------|--------------------------|--------------------------|-----------------|-----------------|------------------------------------|-------------------------------------|
| La | -0.30                    | -3.66                    | -3.16                    | -4.24           | 4.44            | -80.03                             | -83.39                              |
| Ce | -0.15                    | -3.54                    | -3.32                    | -4.19           | 4.60            | -80.63                             | -84.03                              |
| Nd | 0.14                     | -3.60                    | -4.03                    | -4.32           | 5.08            | -79.80                             | -83.54                              |
| Eu | 0.34                     | -3.11                    | -2.97                    | -3.84           | 5.11            | -79.97                             | -83.42                              |
| Tb | 0.73                     | -2.88                    | -2.61                    | -4.00           | 5.67            | -79.48                             | -83.09                              |
| Er | 1.48                     | -1.86                    | -2.55                    | -3.73           | 5.89            | -79.23                             | -82.57                              |
| Yb | 1.80                     | -1.60                    | -3.35                    | -3.83           | 6.05            | -79.56                             | -82.96                              |
| Lu | 1.80                     | -1.37                    | -3.71                    | -3.78           | 6.20            | -79.49                             | -82.67                              |

<sup>a</sup> Relative free energies are defined as  $\Delta G^\circ = G^\circ_{\text{TSAP}} - G^\circ_{\text{SAP}}$ ; Note that the actual values of the complex free energies are negative, and therefore a positive relative free energy indicates that the SAP isomer is more stable than the TSAP one. The

same holds for the relative strain energies, as the actual ligand energies are negative. <sup>b</sup> Values obtained from calculations in the gas-phase. <sup>c</sup> Values calculated in aqueous solution using geometries optimized in the gas phase. <sup>d</sup> Values obtained in solution using geometries optimized in solution. <sup>e</sup> Obtained using the geometries optimized in the gas phase.

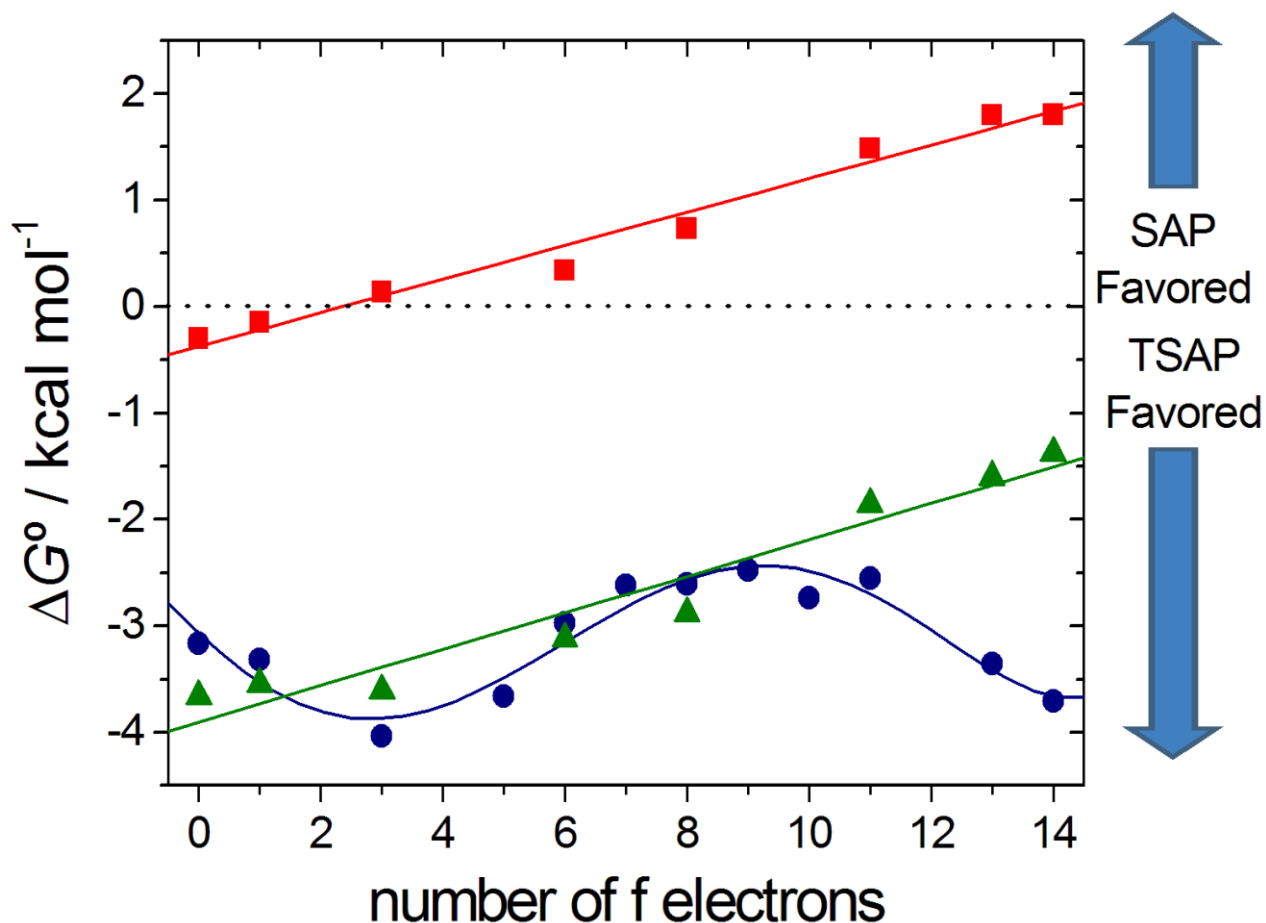

**Figure S18.** Relative energies of the SAP and TSAP isomers of  $[\text{Ln}(\text{DOTMA})(\text{H}_2\text{O})]^-$  complexes calculated in the gas-phase (red squares), in aqueous solution using geometries optimized in the gas phase (green triangles) and in aqueous solution using geometries optimized in water (blue circles). The solid lines are used only as a guide for the eye.

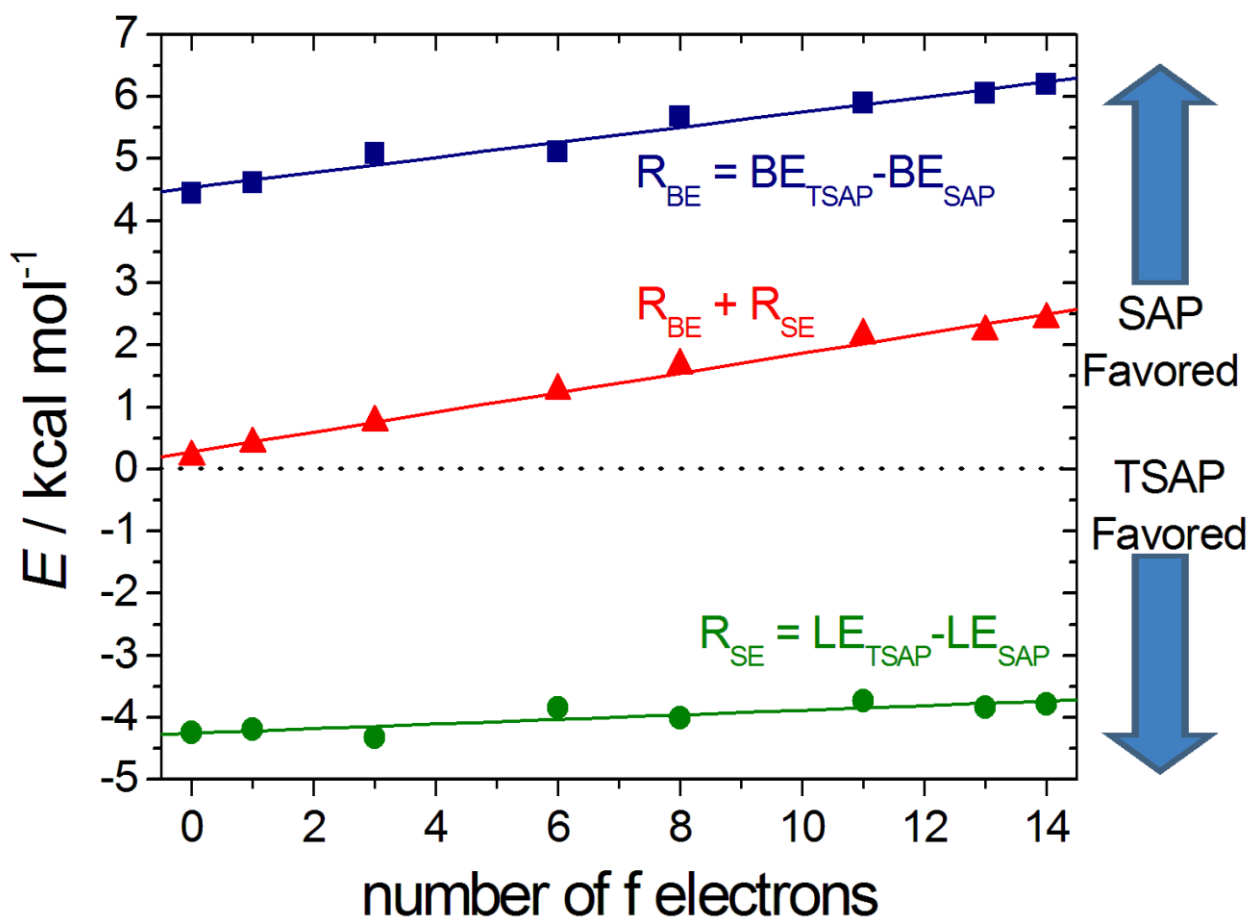

**Figure S19.** Relative energies binding energies ( $R_{BE}$ ) and strain energies ( $R_{SE}$ ) of the ligands in the SAP and TSAP isomers of  $[\text{Ln}(\text{DOTMA})(\text{H}_2\text{O})]^-$  complexes calculated in the gas-phase. The solid lines are used only as a guide for the eye.

The effects of the solvent on the relative energies of the SAP and TSAP isomers of  $[\text{Ln}(\text{DOTMA})(\text{H}_2\text{O})]^-$  were first evaluated by calculating the hydration free energies of the two isomers using the structures optimized in the gas-phase. The hydration free energies of the TSAP isomer are considerably more negative than those of the SAP form ( $3.2 - 3.7 \text{ kcal mol}^{-1}$ , Table 2), and therefore the inclusion of solvent effects provokes an important stabilization of the TSAP form, which becomes the most stable one along the whole lanthanide series from  $\text{La}^{3+}$  to  $\text{Lu}^{3+}$ . This is related to the higher dipole moment of the TSAP complexes ( $26.3\text{-}26.8 D$  in aqueous solution at the TPSSh/LCRECP/6-31G(d,p)

level) compared with the SAP isomers (21.1-22.6 D). However, the hydration free energies of a given isomer do not change significantly across the series, and thus the SAP isomer becomes steadily more stable across the series. This is in contrast to the experimental trend, which shows a stabilization of the SAP isomer on proceeding to the right across the series with a maximum around Tb, with a stabilization of the TSAP isomer for the heaviest Ln<sup>3+</sup> ions. Thus, we conclude that a structural change results in a significant change of the contributions related to the geometry relaxation passing from vacuo to solution. This is confirmed by the relative free energies of the two isomers obtained from geometry optimizations in aqueous solution, which show a bell-like shape with a maximum population of the SAP isomer around Tb (Figure 3).

**Table S3.** Yb<sup>3+</sup>-induced paramagnetic shifts in Ybdota-(gly)<sub>4</sub> versus the geometric factors obtained from DFT calculations.<sup>[a]</sup>

|             | $\theta$ (°) | $r$ (Å) | $(3\cos^2\theta-1)/r^3$ | $\delta_{\text{para}}$ (ppm) |
|-------------|--------------|---------|-------------------------|------------------------------|
| <b>H1ax</b> | 22.93        | 3.744   | 0.0294                  | 95.8                         |
| <b>H1eq</b> | 45.57        | 4.459   | 0.00531                 | 20.9                         |
| <b>H2ax</b> | 67.14        | 3.721   | -0.0106                 | -35.3                        |
| <b>H2eq</b> | 47.11        | 4.467   | 0.00437                 | 17.9                         |
| <b>H3ax</b> | 87.49        | 3.588   | -0.0215                 | -62.4                        |
| <b>H3eq</b> | 72.88        | 4.382   | -0.00880                | -29.8                        |
| <b>H4a</b>  | 123.47       | 5.129   | -0.000649               | -3.1                         |
| <b>H4b</b>  | 108.68       | 5.207   | -0.00490                | -7.1                         |

<sup>[a]</sup> The diamagnetic contribution was assumed to be 3.0 ppm for all nuclei. Negative paramagnetic shifts correspond to shifts to higher field.



**Table S4.** Yb<sup>3+</sup>-induced paramagnetic shifts in YbDOTMA-(gly)<sub>4</sub> versus the geometric factors obtained from DFT calculations.<sup>[a]</sup>

|             | $\theta$ (°) | $r$ (Å) | $(3\cos^2\theta-1)/r^3$ | $\delta_{\text{para}}$ (ppm) |
|-------------|--------------|---------|-------------------------|------------------------------|
| <b>H1ax</b> | 23.27        | 3.685   | 0.0306                  | 119.5                        |
| <b>H1eq</b> | 45.75        | 4.438   | 0.00527                 | 19.9                         |
| <b>H2ax</b> | 67.69        | 3.726   | -0.0110                 | -41.9                        |
| <b>H2eq</b> | 47.23        | 4.442   | 0.00432                 | 15.2                         |
| <b>H3</b>   | 89.71        | 3.456   | -0.0242                 | -85.9                        |
| <b>H4a</b>  | 123.66       | 5.089   | -0.000595               | -3.4                         |
| <b>H4b</b>  | 108.15       | 5.149   | -0.00519                | -8.6                         |
| <b>Me</b>   | 73.36        | 5.346   | -0.00455                | -18.3                        |

<sup>[a]</sup> The diamagnetic contribution was assumed to be 3.0 ppm for all nuclei. Negative paramagnetic shifts correspond to shifts to higher field.

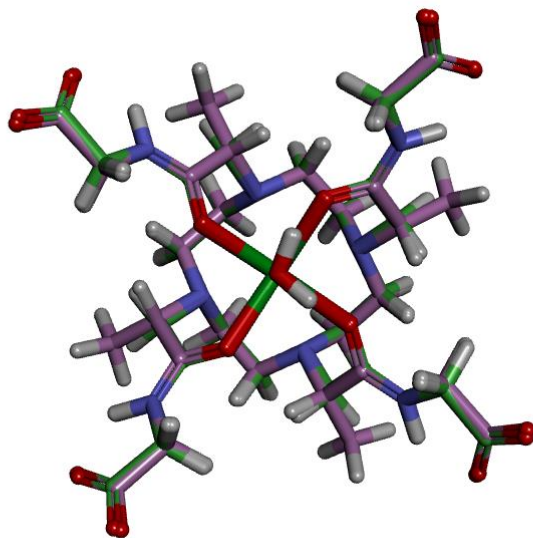

**Figure S20.** Overlay of the DFT structures obtained for the SAP isomers of YbDOTMA-(gly)<sub>4</sub> and YbDOTA-(gly)<sub>4</sub> complexes obtained with DFT calculations.

**Table S5.** [La(DOTMA)(H<sub>2</sub>O)]<sup>-</sup> [SAP, Δ(λλλ)], TPSSh/LCRECP/6-31G(d,p), aqueous solution (0 Imaginary Frequencies)

| Center<br>Number | Atomic<br>Number | Coordinates (Angstroms) |           |           |
|------------------|------------------|-------------------------|-----------|-----------|
|                  |                  | X                       | Y         | Z         |
| 1                | 7                | -2.120791               | 0.740775  | 0.880792  |
| 2                | 6                | -1.627660               | 1.632164  | 1.964225  |
| 3                | 6                | -0.584166               | 2.661298  | 1.527786  |
| 4                | 7                | 0.662987                | 2.059009  | 0.973243  |
| 5                | 6                | 1.483959                | 1.513698  | 2.086956  |
| 6                | 6                | 2.548637                | 0.501996  | 1.664653  |
| 7                | 7                | 1.985587                | -0.727388 | 1.035993  |
| 8                | 6                | 1.412882                | -1.608097 | 2.089454  |
| 9                | 6                | 0.407326                | -2.643277 | 1.583605  |
| 10               | 7                | -0.796726               | -2.047073 | 0.937116  |
| 11               | 6                | -1.701962               | -1.497433 | 1.981745  |
| 12               | 6                | -2.729420               | -0.482793 | 1.476852  |
| 13               | 6                | -3.109174               | 1.406743  | -0.035114 |
| 14               | 6                | -2.405057               | 2.402984  | -0.995534 |
| 15               | 8                | -1.296792               | 1.977483  | -1.513231 |
| 16               | 6                | 1.386499                | 3.083926  | 0.145325  |
| 17               | 6                | 2.413259                | 2.436396  | -0.818781 |
| 18               | 8                | 2.028239                | 1.323854  | -1.366927 |
| 19               | 6                | 3.047284                | -1.399530 | 0.210651  |
| 20               | 6                | 2.436027                | -2.415341 | -0.787983 |
| 21               | 8                | 1.363175                | -2.008639 | -1.398776 |
| 22               | 6                | -1.453695               | -3.071778 | 0.054915  |
| 23               | 6                | -2.417745               | -2.404630 | -0.961795 |
| 24               | 8                | -1.972618               | -1.318862 | -1.508323 |
| 25               | 1                | -1.205907               | 0.992647  | 2.743460  |
| 26               | 1                | -2.458523               | 2.172021  | 2.439016  |
| 27               | 1                | -1.003258               | 3.320058  | 0.764875  |
| 28               | 1                | -0.358641               | 3.288493  | 2.403395  |
| 29               | 1                | 0.795825                | 1.042605  | 2.793120  |
| 30               | 1                | 1.978000                | 2.322366  | 2.642787  |
| 31               | 1                | 3.237947                | 0.955804  | 0.949361  |
| 32               | 1                | 3.136499                | 0.249888  | 2.559872  |
| 33               | 1                | 0.930824                | -0.960972 | 2.826065  |
| 34               | 1                | 2.207186                | -2.139353 | 2.631353  |
| 35               | 1                | 0.883085                | -3.302336 | 0.854625  |
| 36               | 1                | 0.121716                | -3.268863 | 2.442463  |
| 37               | 1                | -1.071405               | -1.028270 | 2.740561  |
| 38               | 1                | -2.242114               | -2.303428 | 2.497564  |
| 39               | 1                | -3.367797               | -0.940872 | 0.719325  |
| 40               | 1                | -3.377594               | -0.223361 | 2.327227  |
| 41               | 1                | -3.444232               | 0.592951  | -0.690886 |
| 42               | 1                | 0.608382                | 3.470595  | -0.525495 |
| 43               | 1                | 3.427352                | -0.592842 | -0.429542 |
| 44               | 1                | -0.629039               | -3.449412 | -0.563221 |
| 45               | 8                | 0.957783                | -0.152082 | -3.334395 |
| 46               | 1                | 1.629438                | 0.496976  | -3.031057 |
| 47               | 1                | 1.324989                | -1.016927 | -3.050957 |
| 48               | 6                | -2.104100               | -4.251291 | 0.784524  |
| 49               | 1                | -3.015267               | -3.957550 | 1.311985  |
| 50               | 1                | -2.388681               | -5.004012 | 0.046116  |
| 51               | 1                | -1.413830               | -4.714093 | 1.496851  |
| 52               | 6                | 4.217384                | -1.997825 | 0.998155  |
| 53               | 1                | 4.992318                | -2.303850 | 0.292139  |
| 54               | 1                | 4.652020                | -1.268280 | 1.688422  |

|    |    |           |           |           |
|----|----|-----------|-----------|-----------|
| 55 | 1  | 3.924071  | -2.888112 | 1.560518  |
| 56 | 6  | 1.990156  | 4.257026  | 0.925097  |
| 57 | 1  | 2.859616  | 3.956469  | 1.515885  |
| 58 | 1  | 2.329852  | 5.011127  | 0.212320  |
| 59 | 1  | 1.253238  | 4.718970  | 1.589286  |
| 60 | 6  | -4.330317 | 2.025135  | 0.652269  |
| 61 | 1  | -4.075312 | 2.929673  | 1.210395  |
| 62 | 1  | -5.054481 | 2.313163  | -0.112941 |
| 63 | 1  | -4.813135 | 1.313324  | 1.329366  |
| 64 | 8  | 3.005246  | -3.496707 | -0.987818 |
| 65 | 8  | 3.479774  | 3.018940  | -1.055123 |
| 66 | 8  | -2.944695 | 3.491688  | -1.245300 |
| 67 | 8  | -3.500482 | -2.950864 | -1.222691 |
| 68 | 57 | -0.012777 | 0.001113  | -0.757818 |

E(RTPSSh) = -1710.8181719 Hartree

Zero-point correction = 0.560676 Hartree/particle

Sum of electronic and thermal Energies = -1710.221705 Hartree

Sum of electronic and thermal Enthalpies = -1710.220761 Hartree

Sum of electronic and thermal Free Energies = -1710.322691 Hartree

**Table S6.** [Ce(DOTMA)(H<sub>2</sub>O)]<sup>-</sup> [SAP, Δ(λλλλ)], TPSSh/LCRECP/6-31G(d,p), aqueous solution (0 Imaginary Frequencies)

| Center Number | Atomic Number | Coordinates (Angstroms) |           |           |
|---------------|---------------|-------------------------|-----------|-----------|
|               |               | X                       | Y         | Z         |
| 1             | 7             | 2.062752                | 0.849897  | 0.895351  |
| 2             | 6             | 2.273546                | -0.139765 | 1.983869  |
| 3             | 6             | 2.189932                | -1.602921 | 1.546503  |
| 4             | 7             | 0.862772                | -1.979824 | 0.979457  |
| 5             | 6             | -0.119485               | -2.151905 | 2.083254  |
| 6             | 6             | -1.584558               | -2.078405 | 1.651245  |
| 7             | 7             | -1.962541               | -0.773624 | 1.034601  |
| 8             | 6             | -2.120319               | 0.254243  | 2.098726  |
| 9             | 6             | -2.057369               | 1.699152  | 1.600922  |
| 10            | 7             | -0.762388               | 2.047831  | 0.948142  |
| 11            | 6             | 0.276750                | 2.261285  | 1.990431  |
| 12            | 6             | 1.717701                | 2.175186  | 1.484691  |
| 13            | 6             | 3.245972                | 0.992000  | -0.020618 |
| 14            | 6             | 3.368113                | -0.219528 | -0.984181 |
| 15            | 8             | 2.250867                | -0.642037 | -1.485527 |
| 16            | 6             | 1.011565                | -3.205713 | 0.120705  |
| 17            | 6             | -0.190916               | -3.394050 | -0.840170 |
| 18            | 8             | -0.650675               | -2.300889 | -1.371498 |
| 19            | 6             | -3.201767               | -0.955117 | 0.200335  |
| 20            | 6             | -3.397686               | 0.210668  | -0.802587 |
| 21            | 8             | -2.316074               | 0.608344  | -1.404700 |
| 22            | 6             | -0.952467               | 3.236935  | 0.046189  |
| 23            | 6             | 0.207878                | 3.365882  | -0.977385 |
| 24            | 8             | 0.588834                | 2.254414  | -1.523574 |
| 25            | 1             | 1.515101                | 0.053097  | 2.746972  |
| 26            | 1             | 3.242813                | 0.016409  | 2.477184  |
| 27            | 1             | 2.948210                | -1.813484 | 0.789784  |
| 28            | 1             | 2.431929                | -2.221813 | 2.423315  |
| 29            | 1             | 0.081223                | -1.371926 | 2.822280  |
| 30            | 1             | 0.037170                | -3.106094 | 2.604407  |
| 31            | 1             | -1.801538               | -2.863099 | 0.923939  |
| 32            | 1             | -2.199898               | -2.285542 | 2.539302  |
| 33            | 1             | -1.327336               | 0.087729  | 2.832523  |
| 34            | 1             | -3.065533               | 0.116820  | 2.640934  |

|    |    |           |           |           |
|----|----|-----------|-----------|-----------|
| 35 | 1  | -2.854614 | 1.882842  | 0.877896  |
| 36 | 1  | -2.250617 | 2.354031  | 2.463427  |
| 37 | 1  | 0.118820  | 1.505777  | 2.764506  |
| 38 | 1  | 0.143048  | 3.232206  | 2.486486  |
| 39 | 1  | 1.894581  | 2.935691  | 0.721413  |
| 40 | 1  | 2.378166  | 2.412175  | 2.332187  |
| 41 | 1  | 2.966736  | 1.826526  | -0.676068 |
| 42 | 1  | 1.842379  | -2.950475 | -0.548961 |
| 43 | 1  | -2.959058 | -1.814149 | -0.437613 |
| 44 | 1  | -1.819919 | 2.960523  | -0.566050 |
| 45 | 8  | -0.715099 | -0.442579 | -3.310775 |
| 46 | 1  | -0.801489 | -1.384621 | -3.048620 |
| 47 | 1  | -1.576922 | -0.050853 | -3.051153 |
| 48 | 6  | -1.249780 | 4.561216  | 0.755711  |
| 49 | 1  | -0.377031 | 4.951824  | 1.285473  |
| 50 | 1  | -1.528206 | 5.303407  | 0.004533  |
| 51 | 1  | -2.079140 | 4.461362  | 1.463062  |
| 52 | 6  | -4.483825 | -1.265907 | 0.979691  |
| 53 | 1  | -5.265622 | -1.536398 | 0.266918  |
| 54 | 1  | -4.342834 | -2.104674 | 1.668397  |
| 55 | 1  | -4.846501 | -0.401852 | 1.542574  |
| 56 | 6  | 1.357988  | -4.498176 | 0.867172  |
| 57 | 1  | 0.518578  | -4.872527 | 1.459173  |
| 58 | 1  | 1.601986  | -5.267927 | 0.132229  |
| 59 | 1  | 2.223032  | -4.363289 | 1.523837  |
| 60 | 6  | 4.574590  | 1.323872  | 0.665482  |
| 61 | 1  | 4.967152  | 0.478784  | 1.237140  |
| 62 | 1  | 5.313202  | 1.563189  | -0.102477 |
| 63 | 1  | 4.478780  | 2.187926  | 1.330610  |
| 64 | 8  | -4.535478 | 0.649355  | -1.016593 |
| 65 | 8  | -0.598770 | -4.535596 | -1.091215 |
| 66 | 8  | 4.492259  | -0.668773 | -1.254584 |
| 67 | 8  | 0.657420  | 4.490007  | -1.247340 |
| 68 | 58 | 0.007030  | 0.006151  | -0.723895 |

E(RTPSSh) = -1711.4699447 Hartree

Zero-point correction = 0.560549 Hartree/particle

Sum of electronic and thermal Energies = -1710.873630 Hartree

Sum of electronic and thermal Enthalpies = -1710.872686 Hartree

Sum of electronic and thermal Free Energies = -1710.974039 Hartree

**Table S7.** [Pr(DOTMA)(H<sub>2</sub>O)]<sup>-</sup> [SAP, Δ(λλλλ)], TPSSh/LCRECP/6-31G(d,p), aqueous solution (0 Imaginary Frequencies)

| Center Number | Atomic Number | Coordinates (Angstroms) |           |           |
|---------------|---------------|-------------------------|-----------|-----------|
|               |               | X                       | Y         | Z         |
| 1             | 7             | 1.984962                | 0.996533  | 0.902548  |
| 2             | 6             | 2.273994                | 0.027021  | 1.991593  |
| 3             | 6             | 2.297336                | -1.437485 | 1.553055  |
| 4             | 7             | 1.001592                | -1.908122 | 0.983648  |
| 5             | 6             | 0.034717                | -2.155125 | 2.085704  |
| 6             | 6             | -1.429716               | -2.192214 | 1.649122  |
| 7             | 7             | -1.900101               | -0.918369 | 1.031863  |
| 8             | 6             | -2.143604               | 0.091022  | 2.096841  |
| 9             | 6             | -2.185093               | 1.536643  | 1.601005  |
| 10            | 7             | -0.916471               | 1.978471  | 0.953844  |
| 11            | 6             | 0.100571                | 2.267463  | 1.999290  |
| 12            | 6             | 1.543539                | 2.292013  | 1.493860  |
| 13            | 6             | 3.152329                | 1.224968  | -0.016509 |
| 14            | 6             | 3.353138                | 0.030009  | -0.986614 |

|    |    |           |           |           |
|----|----|-----------|-----------|-----------|
| 15 | 8  | 2.264842  | -0.473445 | -1.477422 |
| 16 | 6  | 1.240101  | -3.116055 | 0.120278  |
| 17 | 6  | 0.061183  | -3.379714 | -0.851012 |
| 18 | 8  | -0.475400 | -2.316588 | -1.371255 |
| 19 | 6  | -3.114301 | -1.190623 | 0.186595  |
| 20 | 6  | -3.383804 | -0.044251 | -0.820948 |
| 21 | 8  | -2.326229 | 0.439536  | -1.401961 |
| 22 | 6  | -1.188766 | 3.150533  | 0.051157  |
| 23 | 6  | -0.043953 | 3.353859  | -0.975860 |
| 24 | 8  | 0.421413  | 2.266784  | -1.505446 |
| 25 | 1  | 1.508136  | 0.164569  | 2.759350  |
| 26 | 1  | 3.231884  | 0.254876  | 2.478806  |
| 27 | 1  | 3.069974  | -1.591523 | 0.797166  |
| 28 | 1  | 2.582157  | -2.038961 | 2.429061  |
| 29 | 1  | 0.174981  | -1.362503 | 2.825238  |
| 30 | 1  | 0.261850  | -3.094964 | 2.607064  |
| 31 | 1  | -1.584591 | -2.990654 | 0.920742  |
| 32 | 1  | -2.031673 | -2.445118 | 2.534452  |
| 33 | 1  | -1.347124 | -0.017903 | 2.837520  |
| 34 | 1  | -3.080476 | -0.117584 | 2.630935  |
| 35 | 1  | -2.990471 | 1.661556  | 0.874440  |
| 36 | 1  | -2.430244 | 2.174750  | 2.463025  |
| 37 | 1  | -0.001171 | 1.500594  | 2.771530  |
| 38 | 1  | -0.106808 | 3.224395  | 2.497204  |
| 39 | 1  | 1.662439  | 3.065133  | 0.732042  |
| 40 | 1  | 2.185030  | 2.576351  | 2.341338  |
| 41 | 1  | 2.814739  | 2.041916  | -0.666852 |
| 42 | 1  | 2.056547  | -2.801245 | -0.542091 |
| 43 | 1  | -2.803571 | -2.030292 | -0.448010 |
| 44 | 1  | -2.037269 | 2.816268  | -0.558935 |
| 45 | 8  | -0.609973 | -0.445569 | -3.284512 |
| 46 | 1  | -0.636131 | -1.396781 | -3.043241 |
| 47 | 1  | -1.507614 | -0.124297 | -3.051910 |
| 48 | 6  | -1.571916 | 4.453368  | 0.759642  |
| 49 | 1  | -0.723460 | 4.906760  | 1.278787  |
| 50 | 1  | -1.910574 | 5.171050  | 0.009472  |
| 51 | 1  | -2.384573 | 4.297508  | 1.476266  |
| 52 | 6  | -4.377510 | -1.592660 | 0.954564  |
| 53 | 1  | -5.127410 | -1.932192 | 0.237093  |
| 54 | 1  | -4.178854 | -2.409864 | 1.654897  |
| 55 | 1  | -4.813109 | -0.753348 | 1.502998  |
| 56 | 6  | 1.668406  | -4.385527 | 0.863600  |
| 57 | 1  | 0.850123  | -4.822794 | 1.441965  |
| 58 | 1  | 1.977400  | -5.131180 | 0.128322  |
| 59 | 1  | 2.512383  | -4.192748 | 1.533152  |
| 60 | 6  | 4.457555  | 1.643130  | 0.667392  |
| 61 | 1  | 4.910905  | 0.822654  | 1.229879  |
| 62 | 1  | 5.174027  | 1.940337  | -0.101242 |
| 63 | 1  | 4.304250  | 2.492618  | 1.340553  |
| 64 | 8  | -4.548914 | 0.300886  | -1.058271 |
| 65 | 8  | -0.259253 | -4.544926 | -1.119596 |
| 66 | 8  | 4.504408  | -0.332805 | -1.271465 |
| 67 | 8  | 0.316057  | 4.505056  | -1.264672 |
| 68 | 59 | 0.007925  | 0.007684  | -0.703798 |

-----  
E(RTPSSh) = -1712.105256 Hartree

Zero-point correction = 0.560304 Hartree/particle

Sum of electronic and thermal Energies = -1711.509237 Hartree

Sum of electronic and thermal Enthalpies = -1711.508293 Hartree

Sum of electronic and thermal Free Energies = -1711.609495 Hartree

**Table S8.** [Nd(DOTMA)(H<sub>2</sub>O)]<sup>-</sup> [SAP, Δ(λλλλ)], TPSSh/LCRECP/6-31G(d,p), aqueous solution (0 Imaginary Frequencies)

| Center Number | Atomic Number | Coordinates (Angstroms) |           |           |
|---------------|---------------|-------------------------|-----------|-----------|
|               |               | X                       | Y         | Z         |
| 1             | 7             | 1.927246                | 1.090421  | 0.906949  |
| 2             | 6             | 2.268969                | 0.139211  | 1.996101  |
| 3             | 6             | 2.364393                | -1.321178 | 1.556331  |
| 4             | 7             | 1.093261                | -1.851540 | 0.984405  |
| 5             | 6             | 0.141948                | -2.151266 | 2.086467  |
| 6             | 6             | -1.318242               | -2.260370 | 1.649101  |
| 7             | 7             | -1.849075               | -1.010657 | 1.031564  |
| 8             | 6             | -2.145060               | -0.016603 | 2.097923  |
| 9             | 6             | -2.257345               | 1.425126  | 1.602727  |
| 10            | 7             | -1.010756               | 1.926598  | 0.956892  |
| 11            | 6             | -0.012333               | 2.269575  | 2.003516  |
| 12            | 6             | 1.427077                | 2.363952  | 1.498287  |
| 13            | 6             | 3.079647                | 1.372522  | -0.016802 |
| 14            | 6             | 3.327286                | 0.188714  | -0.988456 |
| 15            | 8             | 2.259016                | -0.364352 | -1.469460 |
| 16            | 6             | 1.390468                | -3.042680 | 0.116017  |
| 17            | 6             | 0.223978                | -3.356967 | -0.853422 |
| 18            | 8             | -0.366272               | -2.317070 | -1.362605 |
| 19            | 6             | -3.045902               | -1.340624 | 0.182993  |
| 20            | 6             | -3.365541               | -0.203745 | -0.818515 |
| 21            | 8             | -2.328154               | 0.332652  | -1.389859 |
| 22            | 6             | -1.336561               | 3.081512  | 0.049777  |
| 23            | 6             | -0.201112               | 3.329969  | -0.976070 |
| 24            | 8             | 0.315385                | 2.260949  | -1.494578 |
| 25            | 1             | 1.499106                | 0.239337  | 2.765712  |
| 26            | 1             | 3.215578                | 0.415485  | 2.480175  |
| 27            | 1             | 3.144713                | -1.436390 | 0.801544  |
| 28            | 1             | 2.676919                | -1.910050 | 2.431480  |
| 29            | 1             | 0.243293                | -1.354183 | 2.827630  |
| 30            | 1             | 0.416230                | -3.079923 | 2.605212  |
| 31            | 1             | -1.433423               | -3.065504 | 0.920752  |
| 32            | 1             | -1.907965               | -2.542608 | 2.533872  |
| 33            | 1             | -1.344706               | -0.087301 | 2.839080  |
| 34            | 1             | -3.070952               | -0.272125 | 2.630839  |
| 35            | 1             | -3.067314               | 1.510740  | 0.875601  |
| 36            | 1             | -2.534310               | 2.050549  | 2.464525  |
| 37            | 1             | -0.077394               | 1.500453  | 2.777501  |
| 38            | 1             | -0.267759               | 3.216331  | 2.498521  |
| 39            | 1             | 1.508381                | 3.141843  | 0.736491  |
| 40            | 1             | 2.055104                | 2.678832  | 2.345126  |
| 41            | 1             | 2.703820                | 2.174428  | -0.664891 |
| 42            | 1             | 2.190088                | -2.685652 | -0.545696 |
| 43            | 1             | -2.692525               | -2.161433 | -0.454057 |
| 44            | 1             | -2.168600               | 2.707270  | -0.559748 |
| 45            | 8             | -0.581005               | -0.460649 | -3.263210 |
| 46            | 1             | -0.565042               | -1.411972 | -3.020984 |
| 47            | 1             | -1.491599               | -0.178762 | -3.029606 |
| 48            | 6             | -1.778789               | 4.368861  | 0.751927  |
| 49            | 1             | -0.951623               | 4.864372  | 1.266920  |
| 50            | 1             | -2.152229               | 5.065625  | -0.001392 |
| 51            | 1             | -2.581864               | 4.178909  | 1.471123  |
| 52            | 6             | -4.290347               | -1.806829 | 0.945195  |
| 53            | 1             | -5.018490               | -2.186046 | 0.225205  |
| 54            | 1             | -4.052366               | -2.611617 | 1.647602  |
| 55            | 1             | -4.771384               | -0.990519 | 1.490272  |
| 56            | 6             | 1.879925                | -4.293578 | 0.852878  |

|    |    |           |           |           |
|----|----|-----------|-----------|-----------|
| 57 | 1  | 1.082619  | -4.775107 | 1.425291  |
| 58 | 1  | 2.228747  | -5.018313 | 0.114553  |
| 59 | 1  | 2.710798  | -4.062576 | 1.526665  |
| 60 | 6  | 4.368662  | 1.847039  | 0.660907  |
| 61 | 1  | 4.861215  | 1.046568  | 1.219250  |
| 62 | 1  | 5.066832  | 2.176754  | -0.111253 |
| 63 | 1  | 4.181630  | 2.687908  | 1.336344  |
| 64 | 8  | -4.544239 | 0.081482  | -1.067811 |
| 65 | 8  | -0.040108 | -4.534028 | -1.131153 |
| 66 | 8  | 4.491138  | -0.123420 | -1.282580 |
| 67 | 8  | 0.107764  | 4.493691  | -1.274088 |
| 68 | 60 | 0.006747  | 0.009684  | -0.692115 |

-----  
E(RTPSSh) = -1712.72839 Hartree

Zero-point correction = 0.561232 Hartree/particle

Sum of electronic and thermal Energies = -1712.131757 Hartree

Sum of electronic and thermal Enthalpies = -1712.130813 Hartree

Sum of electronic and thermal Free Energies = -1712.230381 Hartree

**Table S9.** [Sm(DOTMA)(H<sub>2</sub>O)]<sup>-</sup> [SAP, Δ(λλλλ)], TPSSh/LCRECP/6-31G(d,p), aqueous solution (0 Imaginary Frequencies)

| Center<br>Number | Atomic<br>Number | Coordinates (Angstroms) |           |           |
|------------------|------------------|-------------------------|-----------|-----------|
|                  |                  | X                       | Y         | Z         |
| 1                | 7                | 0.813819                | 2.038407  | 0.924143  |
| 2                | 6                | 1.672061                | 1.508939  | 2.016329  |
| 3                | 6                | 2.664692                | 0.435144  | 1.572398  |
| 4                | 7                | 2.006556                | -0.768439 | 0.988873  |
| 5                | 6                | 1.462209                | -1.614667 | 2.083155  |
| 6                | 6                | 0.387993                | -2.604402 | 1.635856  |
| 7                | 7                | -0.803948               | -1.947172 | 1.028515  |
| 8                | 6                | -1.647237               | -1.359547 | 2.102395  |
| 9                | 6                | -2.646086               | -0.313390 | 1.609208  |
| 10               | 7                | -1.991758               | 0.859257  | 0.963018  |
| 11               | 6                | -1.442694               | 1.758597  | 2.011428  |
| 12               | 6                | -0.370758               | 2.725964  | 1.511323  |
| 13               | 6                | 1.542305                | 2.975968  | 0.002424  |
| 14               | 6                | 2.462259                | 2.202688  | -0.976915 |
| 15               | 8                | 1.962941                | 1.106132  | -1.454027 |
| 16               | 6                | 2.981146                | -1.499147 | 0.108488  |
| 17               | 6                | 2.262632                | -2.449554 | -0.879541 |
| 18               | 8                | 1.145491                | -1.995662 | -1.364644 |
| 19               | 6                | -1.542966               | -2.940503 | 0.176226  |
| 20               | 6                | -2.479023               | -2.239309 | -0.837969 |
| 21               | 8                | -1.993936               | -1.161018 | -1.377744 |
| 22               | 6                | -2.964568               | 1.545956  | 0.045832  |
| 23               | 6                | -2.227745               | 2.448800  | -0.976121 |
| 24               | 8                | -1.141305               | 1.944757  | -1.471288 |
| 25               | 1                | 1.008017                | 1.097691  | 2.780515  |
| 26               | 1                | 2.231759                | 2.316970  | 2.507020  |
| 27               | 1                | 3.347681                | 0.841244  | 0.823148  |
| 28               | 1                | 3.275166                | 0.164010  | 2.446390  |
| 29               | 1                | 1.048602                | -0.944042 | 2.840355  |
| 30               | 1                | 2.262390                | -2.175715 | 2.584507  |
| 31               | 1                | 0.798503                | -3.296822 | 0.897805  |
| 32               | 1                | 0.101705                | -3.203895 | 2.512658  |
| 33               | 1                | -0.974508               | -0.904623 | 2.834583  |
| 34               | 1                | -2.198412               | -2.140589 | 2.643527  |
| 35               | 1                | -3.330067               | -0.758323 | 0.883357  |
| 36               | 1                | -3.254574               | -0.000027 | 2.470265  |

|    |    |           |           |           |
|----|----|-----------|-----------|-----------|
| 37 | 1  | -1.026065 | 1.123954  | 2.797118  |
| 38 | 1  | -2.240463 | 2.342958  | 2.489741  |
| 39 | 1  | -0.787958 | 3.385380  | 0.747580  |
| 40 | 1  | -0.076099 | 3.363316  | 2.358198  |
| 41 | 1  | 0.748868  | 3.376483  | -0.641026 |
| 42 | 1  | 3.384685  | -0.711661 | -0.540617 |
| 43 | 1  | -0.757543 | -3.376379 | -0.453926 |
| 44 | 1  | -3.367987 | 0.728789  | -0.565001 |
| 45 | 8  | -0.137089 | -0.600217 | -3.224853 |
| 46 | 1  | 0.463471  | -1.346119 | -3.007928 |
| 47 | 1  | -1.028545 | -0.960085 | -3.030592 |
| 48 | 6  | -4.124559 | 2.270482  | 0.735223  |
| 49 | 1  | -3.799830 | 3.183249  | 1.241411  |
| 50 | 1  | -4.851941 | 2.565558  | -0.024028 |
| 51 | 1  | -4.629246 | 1.622982  | 1.459433  |
| 52 | 6  | -2.250378 | -4.068498 | 0.934478  |
| 53 | 1  | -2.585826 | -4.816488 | 0.213066  |
| 54 | 1  | -1.577216 | -4.556432 | 1.646295  |
| 55 | 1  | -3.136502 | -3.716207 | 1.469216  |
| 56 | 6  | 4.142513  | -2.187018 | 0.833591  |
| 57 | 1  | 3.820635  | -3.077396 | 1.380350  |
| 58 | 1  | 4.873776  | -2.512045 | 0.090698  |
| 59 | 1  | 4.640287  | -1.504413 | 1.529442  |
| 60 | 6  | 2.266252  | 4.141208  | 0.683804  |
| 61 | 1  | 3.161891  | 3.814397  | 1.218634  |
| 62 | 1  | 2.589539  | 4.848082  | -0.083169 |
| 63 | 1  | 1.609037  | 4.669997  | 1.381592  |
| 64 | 8  | -3.573048 | -2.746597 | -1.117320 |
| 65 | 8  | 2.792448  | -3.522769 | -1.194374 |
| 66 | 8  | 3.564491  | 2.681250  | -1.283807 |
| 67 | 8  | -2.721558 | 3.540859  | -1.294580 |
| 68 | 62 | 0.000134  | 0.014221  | -0.666469 |

E(RTPSSh) = -1713.9504937 Hartree

Zero-point correction = 0.561384 Hartree/particle

Sum of electronic and thermal Energies = -1713.353788 Hartree

Sum of electronic and thermal Enthalpies = -1713.352843 Hartree

Sum of electronic and thermal Free Energies = -1713.452667 Hartree

**Table S10.** [Eu(DOTMA)(H<sub>2</sub>O)]<sup>-</sup> [SAP, Δ(λλλλ)], TPSSh/LCRECP/6-31G(d,p), aqueous solution (0 Imaginary Frequencies)

| Center Number | Atomic Number | Coordinates (Angstroms) |           |           |
|---------------|---------------|-------------------------|-----------|-----------|
|               |               | X                       | Y         | Z         |
| 1             | 7             | 0.788212                | 2.043332  | 0.927382  |
| 2             | 6             | 1.656354                | 1.528114  | 2.018732  |
| 3             | 6             | 2.659115                | 0.464346  | 1.574191  |
| 4             | 7             | 2.011290                | -0.744771 | 0.990679  |
| 5             | 6             | 1.477786                | -1.596627 | 2.085860  |
| 6             | 6             | 0.417159                | -2.600216 | 1.637262  |
| 7             | 7             | -0.780585               | -1.956145 | 1.027179  |
| 8             | 6             | -1.634509               | -1.384628 | 2.101102  |
| 9             | 6             | -2.643383               | -0.348391 | 1.608543  |
| 10            | 7             | -1.998505               | 0.831092  | 0.965688  |
| 11            | 6             | -1.460073               | 1.732663  | 2.017678  |
| 12            | 6             | -0.402967               | 2.716154  | 1.517939  |
| 13            | 6             | 1.502114                | 2.987339  | 0.001362  |
| 14            | 6             | 2.424669                | 2.221163  | -0.980364 |
| 15            | 8             | 1.938121                | 1.113251  | -1.443940 |
| 16            | 6             | 2.990625                | -1.465114 | 0.107609  |



|    |    |           |           |           |
|----|----|-----------|-----------|-----------|
| 17 | 6  | 2.277993  | -2.415466 | -0.883760 |
| 18 | 8  | 1.151721  | -1.972040 | -1.357324 |
| 19 | 6  | -1.503338 | -2.954429 | 0.167295  |
| 20 | 6  | -2.441605 | -2.258918 | -0.848007 |
| 21 | 8  | -1.969549 | -1.167326 | -1.372503 |
| 22 | 6  | -2.975507 | 1.511176  | 0.048534  |
| 23 | 6  | -2.243477 | 2.414415  | -0.975707 |
| 24 | 8  | -1.149127 | 1.918696  | -1.461269 |
| 25 | 1  | 0.999079  | 1.112645  | 2.786536  |
| 26 | 1  | 2.208289  | 2.344366  | 2.504495  |
| 27 | 1  | 3.337389  | 0.877195  | 0.824459  |
| 28 | 1  | 3.273098  | 0.198419  | 2.447321  |
| 29 | 1  | 1.054358  | -0.929670 | 2.841033  |
| 30 | 1  | 2.284865  | -2.145964 | 2.589159  |
| 31 | 1  | 0.837600  | -3.287935 | 0.900494  |
| 32 | 1  | 0.135565  | -3.203013 | 2.513291  |
| 33 | 1  | -0.968941 | -0.925169 | 2.836677  |
| 34 | 1  | -2.177585 | -2.174731 | 2.637268  |
| 35 | 1  | -3.321174 | -0.798946 | 0.880474  |
| 36 | 1  | -3.256774 | -0.042071 | 2.468655  |
| 37 | 1  | -1.031543 | 1.099404  | 2.798271  |
| 38 | 1  | -2.264799 | 2.302884  | 2.501369  |
| 39 | 1  | -0.830265 | 3.371661  | 0.756515  |
| 40 | 1  | -0.114143 | 3.355707  | 2.365106  |
| 41 | 1  | 0.701867  | 3.377842  | -0.639555 |
| 42 | 1  | 3.387980  | -0.672590 | -0.539044 |
| 43 | 1  | -0.709792 | -3.377449 | -0.461558 |
| 44 | 1  | -3.374997 | 0.691106  | -0.560697 |
| 45 | 8  | -0.123777 | -0.565176 | -3.206952 |
| 46 | 1  | 0.483805  | -1.307681 | -2.998864 |
| 47 | 1  | -1.011518 | -0.937127 | -3.018284 |
| 48 | 6  | -4.138457 | 2.231305  | 0.737329  |
| 49 | 1  | -3.817892 | 3.146602  | 1.241644  |
| 50 | 1  | -4.867747 | 2.521295  | -0.022020 |
| 51 | 1  | -4.639293 | 1.582647  | 1.463196  |
| 52 | 6  | -2.201277 | -4.093674 | 0.917152  |
| 53 | 1  | -2.525421 | -4.841952 | 0.190901  |
| 54 | 1  | -1.525667 | -4.577212 | 1.629655  |
| 55 | 1  | -3.093358 | -3.753577 | 1.449885  |
| 56 | 6  | 4.156951  | -2.147695 | 0.829559  |
| 57 | 1  | 3.841210  | -3.041513 | 1.374311  |
| 58 | 1  | 4.889445  | -2.466039 | 0.085005  |
| 59 | 1  | 4.650976  | -1.463853 | 1.526885  |
| 60 | 6  | 2.216752  | 4.161262  | 0.677342  |
| 61 | 1  | 3.118135  | 3.844986  | 1.208847  |
| 62 | 1  | 2.529080  | 4.870021  | -0.092425 |
| 63 | 1  | 1.556972  | 4.684262  | 1.377088  |
| 64 | 8  | -3.523544 | -2.782202 | -1.144272 |
| 65 | 8  | 2.818686  | -3.479557 | -1.210913 |
| 66 | 8  | 3.516482  | 2.714132  | -1.301447 |
| 67 | 8  | -2.747460 | 3.498662  | -1.304999 |
| 68 | 63 | -0.000058 | 0.014392  | -0.650342 |

-----  
E(RTPSSh) = -1714.5481586 Hartree  
Zero-point correction = 0.561636 Hartree/particle  
Sum of electronic and thermal Energies = -1713.951299 Hartree  
Sum of electronic and thermal Enthalpies = -1713.950354 Hartree  
Sum of electronic and thermal Free Energies = -1714.049723 Hartree

**Table S11.** [Gd(DOTMA)(H<sub>2</sub>O)]<sup>-</sup> [SAP, Δ(λλλλ)], TPSSh/LCRECP/6-31G(d,p), aqueous solution (0 Imaginary Frequencies)

| Center<br>Number | Atomic<br>Number | Coordinates (Angstroms) |           |           |
|------------------|------------------|-------------------------|-----------|-----------|
|                  |                  | X                       | Y         | Z         |
| 1                | 7                | 0.818456                | 2.026390  | 0.931962  |
| 2                | 6                | 1.681101                | 1.498938  | 2.021370  |
| 3                | 6                | 2.667188                | 0.421088  | 1.574199  |
| 4                | 7                | 1.998000                | -0.775430 | 0.989585  |
| 5                | 6                | 1.452546                | -1.620490 | 2.084331  |
| 6                | 6                | 0.377239                | -2.608025 | 1.635787  |
| 7                | 7                | -0.809704               | -1.944559 | 1.025782  |
| 8                | 6                | -1.658320               | -1.364438 | 2.099998  |
| 9                | 6                | -2.648992               | -0.309997 | 1.609380  |
| 10               | 7                | -1.983672               | 0.859189  | 0.968818  |
| 11               | 6                | -1.434559               | 1.753441  | 2.021310  |
| 12               | 6                | -0.360597               | 2.719210  | 1.523560  |
| 13               | 6                | 1.545049                | 2.956343  | 0.002173  |
| 14               | 6                | 2.449238                | 2.172609  | -0.981879 |
| 15               | 8                | 1.946568                | 1.067220  | -1.433766 |
| 16               | 6                | 2.961469                | -1.510935 | 0.102693  |
| 17               | 6                | 2.227582                | -2.442803 | -0.889822 |
| 18               | 8                | 1.104782                | -1.979261 | -1.352480 |
| 19               | 6                | -1.545467               | -2.927822 | 0.160957  |
| 20               | 6                | -2.466253               | -2.213067 | -0.855945 |
| 21               | 8                | -1.979318               | -1.119906 | -1.363473 |
| 22               | 6                | -2.945486               | 1.553899  | 0.047490  |
| 23               | 6                | -2.193653               | 2.439721  | -0.976641 |
| 24               | 8                | -1.103719               | 1.925453  | -1.452752 |
| 25               | 1                | 1.020332                | 1.090569  | 2.789729  |
| 26               | 1                | 2.244701                | 2.307261  | 2.507080  |
| 27               | 1                | 3.351362                | 0.823890  | 0.824319  |
| 28               | 1                | 3.277629                | 0.143666  | 2.446246  |
| 29               | 1                | 1.037524                | -0.948839 | 2.839917  |
| 30               | 1                | 2.252009                | -2.181099 | 2.587442  |
| 31               | 1                | 0.786756                | -3.302400 | 0.899057  |
| 32               | 1                | 0.086370                | -3.206466 | 2.511751  |
| 33               | 1                | -0.988822               | -0.918543 | 2.840557  |
| 34               | 1                | -2.215560               | -2.148440 | 2.630485  |
| 35               | 1                | -3.334448               | -0.747078 | 0.880194  |
| 36               | 1                | -3.257361               | 0.005084  | 2.469913  |
| 37               | 1                | -1.018730               | 1.115608  | 2.804767  |
| 38               | 1                | -2.231800               | 2.337176  | 2.501387  |
| 39               | 1                | -0.776170               | 3.383299  | 0.762887  |
| 40               | 1                | -0.060724               | 3.352594  | 2.371519  |
| 41               | 1                | 0.749450                | 3.359574  | -0.636642 |
| 42               | 1                | 3.372386                | -0.724139 | -0.542414 |
| 43               | 1                | -0.757091               | -3.362417 | -0.466453 |
| 44               | 1                | -3.357545               | 0.739667  | -0.561164 |
| 45               | 8                | -0.131439               | -0.526152 | -3.188131 |
| 46               | 1                | 0.461176                | -1.283367 | -2.991053 |
| 47               | 1                | -1.026207               | -0.883251 | -3.003716 |
| 48               | 6                | -4.098012               | 2.296574  | 0.729940  |
| 49               | 1                | -3.763673               | 3.207472  | 1.233316  |
| 50               | 1                | -4.819249               | 2.597038  | -0.032981 |
| 51               | 1                | -4.612971               | 1.658815  | 1.455659  |
| 52               | 6                | -2.264959               | -4.058177 | 0.904129  |
| 53               | 1                | -2.597952               | -4.798552 | 0.173895  |
| 54               | 1                | -1.599750               | -4.554919 | 1.617426  |
| 55               | 1                | -3.153542               | -3.706238 | 1.435095  |
| 56               | 6                | 4.116445                | -2.218137 | 0.819283  |
| 57               | 1                | 3.785562                | -3.107363 | 1.362612  |
| 58               | 1                | 4.840580                | -2.547940 | 0.071636  |

|    |    |           |           |           |
|----|----|-----------|-----------|-----------|
| 59 | 1  | 4.625444  | -1.545847 | 1.517152  |
| 60 | 6  | 2.282691  | 4.119268  | 0.672521  |
| 61 | 1  | 3.179302  | 3.788867  | 1.203589  |
| 62 | 1  | 2.606185  | 4.819052  | -0.100768 |
| 63 | 1  | 1.634160  | 4.657025  | 1.371655  |
| 64 | 8  | -3.549921 | -2.723038 | -1.169168 |
| 65 | 8  | 2.749894  | -3.512461 | -1.229186 |
| 66 | 8  | 3.544215  | 2.650775  | -1.315357 |
| 67 | 8  | -2.679141 | 3.529933  | -1.314841 |
| 68 | 64 | 0.000285  | 0.015272  | -0.632233 |

E(RTPSSh) = -1715.1389338 Hartree

Zero-point correction = 0.561731 Hartree/particle

Sum of electronic and thermal Energies = -1714.542048 Hartree

Sum of electronic and thermal Enthalpies = -1714.541104 Hartree

Sum of electronic and thermal Free Energies = -1714.640142 Hartree

**Table S12.** [Tb(DOTMA)(H<sub>2</sub>O)]<sup>-</sup> [SAP, Δ(λλλλ)], TPSSh/LCRECP/6-31G(d,p), aqueous solution (0 Imaginary Frequencies)

| Center Number | Atomic Number | Coordinates (Angstroms) |           |           |
|---------------|---------------|-------------------------|-----------|-----------|
|               |               | X                       | Y         | Z         |
| 1             | 7             | 0.786927                | 2.030056  | 0.936306  |
| 2             | 6             | 1.657366                | 1.518721  | 2.027339  |
| 3             | 6             | 2.657781                | 0.455073  | 1.579733  |
| 4             | 7             | 2.002851                | -0.748502 | 0.994054  |
| 5             | 6             | 1.475587                | -1.603993 | 2.088852  |
| 6             | 6             | 0.414616                | -2.604657 | 1.637274  |
| 7             | 7             | -0.778670               | -1.953122 | 1.027592  |
| 8             | 6             | -1.635359               | -1.390976 | 2.103766  |
| 9             | 6             | -2.641447               | -0.352375 | 1.612971  |
| 10            | 7             | -1.989793               | 0.824413  | 0.973053  |
| 11            | 6             | -1.457162               | 1.725305  | 2.028098  |
| 12            | 6             | -0.399987               | 2.707850  | 1.529019  |
| 13            | 6             | 1.500433                | 2.969672  | 0.005981  |
| 14            | 6             | 2.412024                | 2.197318  | -0.979366 |
| 15            | 8             | 1.924635                | 1.081575  | -1.422733 |
| 16            | 6             | 2.973629                | -1.467997 | 0.101722  |
| 17            | 6             | 2.249504                | -2.402600 | -0.894704 |
| 18            | 8             | 1.118570                | -1.950468 | -1.349521 |
| 19            | 6             | -1.499967               | -2.942487 | 0.157072  |
| 20            | 6             | -2.425815               | -2.236497 | -0.860663 |
| 21            | 8             | -1.952520               | -1.132670 | -1.358253 |
| 22            | 6             | -2.960329               | 1.507246  | 0.051552  |
| 23            | 6             | -2.219874               | 2.400283  | -0.973840 |
| 24            | 8             | -1.118949               | 1.902006  | -1.441620 |
| 25            | 1             | 1.002192                | 1.103794  | 2.797253  |
| 26            | 1             | 2.209396                | 2.336577  | 2.510147  |
| 27            | 1             | 3.336026                | 0.868007  | 0.830040  |
| 28            | 1             | 3.272498                | 0.184238  | 2.450790  |
| 29            | 1             | 1.053819                | -0.940296 | 2.847867  |
| 30            | 1             | 2.285135                | -2.154125 | 2.587263  |
| 31            | 1             | 0.834593                | -3.291305 | 0.899199  |
| 32            | 1             | 0.129451                | -3.209710 | 2.510522  |
| 33            | 1             | -0.971949               | -0.935540 | 2.843879  |
| 34            | 1             | -2.179071               | -2.185079 | 2.633303  |
| 35            | 1             | -3.319626               | -0.799656 | 0.883219  |
| 36            | 1             | -3.255377               | -0.044766 | 2.472170  |
| 37            | 1             | -1.030143               | 1.092374  | 2.809859  |
| 38            | 1             | -2.264235               | 2.294306  | 2.509226  |

|    |    |           |           |           |
|----|----|-----------|-----------|-----------|
| 39 | 1  | -0.826784 | 3.364964  | 0.768609  |
| 40 | 1  | -0.107388 | 3.346285  | 2.375627  |
| 41 | 1  | 0.698754  | 3.362838  | -0.631150 |
| 42 | 1  | 3.373544  | -0.672939 | -0.539829 |
| 43 | 1  | -0.704279 | -3.364720 | -0.469435 |
| 44 | 1  | -3.362786 | 0.687631  | -0.555887 |
| 45 | 8  | -0.123015 | -0.494951 | -3.172075 |
| 46 | 1  | 0.477049  | -1.247459 | -2.980545 |
| 47 | 1  | -1.013537 | -0.863429 | -2.989602 |
| 48 | 65 | 0.000516  | 0.016652  | -0.627476 |
| 49 | 6  | -4.120940 | 2.237435  | 0.733635  |
| 50 | 1  | -3.796950 | 3.153323  | 1.234740  |
| 51 | 1  | -4.846091 | 2.528050  | -0.029384 |
| 52 | 1  | -4.627993 | 1.595318  | 1.461069  |
| 53 | 6  | -2.208646 | -4.083488 | 0.894048  |
| 54 | 1  | -2.530081 | -4.825582 | 0.160376  |
| 55 | 1  | -1.540880 | -4.574500 | 1.608897  |
| 56 | 1  | -3.103544 | -3.743320 | 1.422066  |
| 57 | 6  | 4.137942  | -2.165594 | 0.812397  |
| 58 | 1  | 3.818732  | -3.063049 | 1.349115  |
| 59 | 1  | 4.865764  | -2.480747 | 0.061973  |
| 60 | 1  | 4.638927  | -1.492255 | 1.515056  |
| 61 | 6  | 2.224960  | 4.141090  | 0.675680  |
| 62 | 1  | 3.127816  | 3.821708  | 1.202897  |
| 63 | 1  | 2.536526  | 4.846367  | -0.097524 |
| 64 | 1  | 1.572043  | 4.669213  | 1.378071  |
| 65 | 8  | -3.499139 | -2.761029 | -1.184449 |
| 66 | 8  | 2.784609  | -3.462248 | -1.244565 |
| 67 | 8  | 3.496414  | 2.691934  | -1.322687 |
| 68 | 8  | -2.723129 | 3.479003  | -1.322141 |

E(RTPSSh) = -1715.7276619 Hartree

Zero-point correction = 0.561876 Hartree/particle

Sum of electronic and thermal Energies = -1715.130694 Hartree

Sum of electronic and thermal Enthalpies = -1715.129750 Hartree

Sum of electronic and thermal Free Energies = -1715.228536 Hartree

**Table S13.** [Dy(DOTMA)(H<sub>2</sub>O)]<sup>-</sup> [SAP, Δ(λλλ)], TPSSh/LCRECP/6-31G(d,p), aqueous solution (0 Imaginary Frequencies)

| Center Number | Atomic Number | Coordinates (Angstroms) |           |           |
|---------------|---------------|-------------------------|-----------|-----------|
|               |               | X                       | Y         | Z         |
| 1             | 7             | 0.993739                | 1.930999  | 0.936948  |
| 2             | 6             | 1.811140                | 1.335179  | 2.026046  |
| 3             | 6             | 2.692359                | 0.174085  | 1.574010  |
| 4             | 7             | 1.907287                | -0.951344 | 0.992778  |
| 5             | 6             | 1.291749                | -1.739312 | 2.092047  |
| 6             | 6             | 0.138682                | -2.630499 | 1.640159  |
| 7             | 7             | -0.978439               | -1.859129 | 1.025867  |
| 8             | 6             | -1.781988               | -1.219209 | 2.100305  |
| 9             | 6             | -2.666973               | -0.077124 | 1.609370  |
| 10            | 7             | -1.886761               | 1.021782  | 0.975074  |
| 11            | 6             | -1.262133               | 1.856755  | 2.034085  |
| 12            | 6             | -0.113732               | 2.729009  | 1.533899  |
| 13            | 6             | 1.797747                | 2.790470  | 0.002928  |
| 14            | 6             | 2.615737                | 1.926768  | -0.987715 |
| 15            | 8             | 2.020678                | 0.855540  | -1.407489 |
| 16            | 6             | 2.791198                | -1.776201 | 0.101246  |
| 17            | 6             | 1.967740                | -2.620198 | -0.898566 |
| 18            | 8             | 0.888617                | -2.048721 | -1.344905 |

|    |    |           |           |           |
|----|----|-----------|-----------|-----------|
| 19 | 6  | -1.791500 | -2.765374 | 0.146154  |
| 20 | 6  | -2.631292 | -1.964088 | -0.874730 |
| 21 | 8  | -2.051983 | -0.901570 | -1.350439 |
| 22 | 6  | -2.775027 | 1.811093  | 0.055351  |
| 23 | 6  | -1.941627 | 2.612424  | -0.973088 |
| 24 | 8  | -0.891039 | 2.003334  | -1.423874 |
| 25 | 1  | 1.120137  | 0.989921  | 2.799325  |
| 26 | 1  | 2.445987  | 2.093022  | 2.504577  |
| 27 | 1  | 3.403646  | 0.513593  | 0.818383  |
| 28 | 1  | 3.280406  | -0.161360 | 2.440816  |
| 29 | 1  | 0.933021  | -1.028269 | 2.840658  |
| 30 | 1  | 2.039663  | -2.362413 | 2.600773  |
| 31 | 1  | 0.489802  | -3.356118 | 0.903562  |
| 32 | 1  | -0.209445 | -3.202270 | 2.512802  |
| 33 | 1  | -1.081960 | -0.843474 | 2.850945  |
| 34 | 1  | -2.411866 | -1.956076 | 2.616702  |
| 35 | 1  | -3.385012 | -0.446259 | 0.874176  |
| 36 | 1  | -3.247996 | 0.294115  | 2.466282  |
| 37 | 1  | -0.896132 | 1.179073  | 2.809640  |
| 38 | 1  | -2.006512 | 2.500273  | 2.522124  |
| 39 | 1  | -0.473609 | 3.426100  | 0.774318  |
| 40 | 1  | 0.246412  | 3.333167  | 2.379421  |
| 41 | 1  | 1.038062  | 3.265947  | -0.629191 |
| 42 | 1  | 3.280236  | -1.030552 | -0.537434 |
| 43 | 1  | -1.038761 | -3.264452 | -0.476461 |
| 44 | 1  | -3.269876 | 1.042046  | -0.549777 |
| 45 | 8  | -0.170863 | -0.446943 | -3.155723 |
| 46 | 1  | 0.337979  | -1.265145 | -2.970394 |
| 47 | 1  | -1.097529 | -0.710264 | -2.970119 |
| 48 | 66 | 0.003389  | 0.016353  | -0.606321 |
| 49 | 6  | -3.844556 | 2.668485  | 0.739292  |
| 50 | 1  | -3.419688 | 3.543849  | 1.238068  |
| 51 | 1  | -4.535195 | 3.036069  | -0.022444 |
| 52 | 1  | -4.417594 | 2.088171  | 1.469695  |
| 53 | 6  | -2.619280 | -3.831138 | 0.871820  |
| 54 | 1  | -3.006401 | -4.534440 | 0.131792  |
| 55 | 1  | -2.010977 | -4.389760 | 1.590133  |
| 56 | 1  | -3.480467 | -3.405058 | 1.393707  |
| 57 | 6  | 3.867771  | -2.602672 | 0.812351  |
| 58 | 1  | 3.448725  | -3.456250 | 1.352321  |
| 59 | 1  | 4.553012  | -3.000923 | 0.061445  |
| 60 | 1  | 4.444371  | -1.989994 | 1.512556  |
| 61 | 6  | 2.644440  | 3.880482  | 0.667558  |
| 62 | 1  | 3.507643  | 3.470446  | 1.198966  |
| 63 | 1  | 3.030191  | 4.543084  | -0.109849 |
| 64 | 1  | 2.051109  | 4.479746  | 1.365744  |
| 65 | 8  | -3.741956 | -2.385401 | -1.222815 |
| 66 | 8  | 2.387861  | -3.727116 | -1.259516 |
| 67 | 8  | 3.733542  | 2.317415  | -1.357483 |
| 68 | 8  | -2.334675 | 3.730387  | -1.339738 |

-----  
E(RTPSSh) = -1716.3144319 Hartree  
Zero-point correction = 0.561910 Hartree/particle  
Sum of electronic and thermal Energies = -1715.717432 Hartree  
Sum of electronic and thermal Enthalpies = -1715.716487 Hartree  
Sum of electronic and thermal Free Energies = -1715.815096 Hartree

**Table S14.** [Ho(DOTMA)(H<sub>2</sub>O)]<sup>-</sup> [SAP, Δ(λλλλ)], TPSSh/LCRECP/6-31G(d,p), aqueous solution (0 Imaginary Frequencies)

-----  
Center      Atomic      Coordinates (Angstroms)

| Number | Number | X         | Y         | Z         |
|--------|--------|-----------|-----------|-----------|
| 1      | 7      | 0.760296  | 2.030523  | 0.942174  |
| 2      | 6      | 1.639990  | 1.534634  | 2.032958  |
| 3      | 6      | 2.651186  | 0.483403  | 1.583010  |
| 4      | 7      | 2.004313  | -0.723868 | 0.996950  |
| 5      | 6      | 1.489491  | -1.584248 | 2.093478  |
| 6      | 6      | 0.444574  | -2.599720 | 1.639834  |
| 7      | 7      | -0.753035 | -1.959583 | 1.027442  |
| 8      | 6      | -1.620476 | -1.416470 | 2.104668  |
| 9      | 6      | -2.636504 | -0.388394 | 1.614977  |
| 10     | 7      | -1.992490 | 0.793723  | 0.978183  |
| 11     | 6      | -1.472779 | 1.697399  | 2.037356  |
| 12     | 6      | -0.431664 | 2.695729  | 1.537988  |
| 13     | 6      | 1.460097  | 2.975374  | 0.007397  |
| 14     | 6      | 2.369224  | 2.207954  | -0.982490 |
| 15     | 8      | 1.895002  | 1.078368  | -1.403965 |
| 16     | 6      | 2.978015  | -1.433860 | 0.101070  |
| 17     | 6      | 2.256415  | -2.362502 | -0.901026 |
| 18     | 8      | 1.114973  | -1.918446 | -1.337447 |
| 19     | 6      | -1.458852 | -2.951936 | 0.148679  |
| 20     | 6      | -2.381676 | -2.248450 | -0.871799 |
| 21     | 8      | -1.921693 | -1.128134 | -1.344744 |
| 22     | 6      | -2.966267 | 1.469936  | 0.055841  |
| 23     | 6      | -2.229153 | 2.359308  | -0.973411 |
| 24     | 8      | -1.116260 | 1.871437  | -1.422897 |
| 25     | 1      | 0.992155  | 1.112358  | 2.805242  |
| 26     | 1      | 2.181849  | 2.361137  | 2.512361  |
| 27     | 1      | 3.323652  | 0.904075  | 0.832584  |
| 28     | 1      | 3.270343  | 0.216298  | 2.452036  |
| 29     | 1      | 1.055136  | -0.924268 | 2.848790  |
| 30     | 1      | 2.306466  | -2.120086 | 2.595370  |
| 31     | 1      | 0.875328  | -3.280760 | 0.902841  |
| 32     | 1      | 0.163455  | -3.208825 | 2.511513  |
| 33     | 1      | -0.965090 | -0.956458 | 2.848762  |
| 34     | 1      | -2.154896 | -2.220800 | 2.628161  |
| 35     | 1      | -3.309017 | -0.840984 | 0.883379  |
| 36     | 1      | -3.254872 | -0.086911 | 2.473143  |
| 37     | 1      | -1.033036 | 1.067361  | 2.814596  |
| 38     | 1      | -2.287660 | 2.251059  | 2.523095  |
| 39     | 1      | -0.868684 | 3.347974  | 0.779308  |
| 40     | 1      | -0.143972 | 3.337119  | 2.383946  |
| 41     | 1      | 0.651648  | 3.361578  | -0.624982 |
| 42     | 1      | 3.374898  | -0.633549 | -0.535449 |
| 43     | 1      | -0.655418 | -3.364134 | -0.474317 |
| 44     | 1      | -3.366704 | 0.647208  | -0.548284 |
| 45     | 8      | -0.113686 | -0.454144 | -3.146686 |
| 46     | 1      | 0.487584  | -1.206489 | -2.958964 |
| 47     | 1      | -1.003024 | -0.826096 | -2.965677 |
| 48     | 67     | 0.000817  | 0.017723  | -0.606462 |
| 49     | 6      | -4.128783 | 2.199204  | 0.735648  |
| 50     | 1      | -3.807796 | 3.118040  | 1.233388  |
| 51     | 1      | -4.854958 | 2.484443  | -0.028365 |
| 52     | 1      | -4.633473 | 1.558248  | 1.465800  |
| 53     | 6      | -2.162942 | -4.102211 | 0.875378  |
| 54     | 1      | -2.473097 | -4.843428 | 0.136004  |
| 55     | 1      | -1.495778 | -4.590876 | 1.592442  |
| 56     | 1      | -3.064099 | -3.772165 | 1.399157  |
| 57     | 6      | 4.144801  | -2.132085 | 0.806860  |
| 58     | 1      | 3.828672  | -3.032812 | 1.339963  |
| 59     | 1      | 4.872258  | -2.441722 | 0.053812  |
| 60     | 1      | 4.645003  | -1.460819 | 1.512099  |

|    |   |           |           |           |
|----|---|-----------|-----------|-----------|
| 61 | 6 | 2.179960  | 4.153273  | 0.670618  |
| 62 | 1 | 3.088156  | 3.842052  | 1.193602  |
| 63 | 1 | 2.481834  | 4.858872  | -0.106104 |
| 64 | 1 | 1.527130  | 4.678204  | 1.375527  |
| 65 | 8 | -3.439564 | -2.787611 | -1.221249 |
| 66 | 8 | 2.801109  | -3.409760 | -1.272750 |
| 67 | 8 | 3.438852  | 2.717404  | -1.349787 |
| 68 | 8 | -2.745016 | 3.425150  | -1.342631 |

E(RTPSSh) = -1716.8982644 Hartree

Zero-point correction = 0.562182 Hartree/particle

Sum of electronic and thermal Energies = -1716.301106 Hartree

Sum of electronic and thermal Enthalpies = -1716.300161 Hartree

Sum of electronic and thermal Free Energies = -1716.398395 Hartree

**Table S15.** [Er(DOTMA)(H<sub>2</sub>O)]<sup>-</sup> [SAP, Δ(λλλλ)], TPSSh/LCRECP/6-31G(d,p), aqueous solution (0 Imaginary Frequencies)

| Center Number | Atomic Number | Coordinates (Angstroms) |           |           |
|---------------|---------------|-------------------------|-----------|-----------|
|               |               | X                       | Y         | Z         |
| 1             | 7             | 0.744789                | 2.031318  | 0.944726  |
| 2             | 6             | 1.628339                | 1.543236  | 2.036048  |
| 3             | 6             | 2.646772                | 0.500297  | 1.584827  |
| 4             | 7             | 2.005618                | -0.709413 | 0.998168  |
| 5             | 6             | 1.497730                | -1.572846 | 2.095561  |
| 6             | 6             | 0.462180                | -2.596672 | 1.641005  |
| 7             | 7             | -0.738145               | -1.963152 | 1.027822  |
| 8             | 6             | -1.610333               | -1.428904 | 2.105788  |
| 9             | 6             | -2.633156               | -0.408358 | 1.616254  |
| 10            | 7             | -1.994722               | 0.776846  | 0.980275  |
| 11            | 6             | -1.482693               | 1.683459  | 2.040937  |
| 12            | 6             | -0.450262               | 2.689870  | 1.541116  |
| 13            | 6             | 1.438089                | 2.979494  | 0.008668  |
| 14            | 6             | 2.346969                | 2.215131  | -0.983000 |
| 15            | 8             | 1.878959                | 1.079772  | -1.395425 |
| 16            | 6             | 2.982007                | -1.413357 | 0.100835  |
| 17            | 6             | 2.263053                | -2.340024 | -0.904250 |
| 18            | 8             | 1.116127                | -1.901551 | -1.331756 |
| 19            | 6             | -1.436252               | -2.957843 | 0.146042  |
| 20            | 6             | -2.357711               | -2.256796 | -0.876615 |
| 21            | 8             | -1.904857               | -1.128985 | -1.338425 |
| 22            | 6             | -2.971265               | 1.447716  | 0.057202  |
| 23            | 6             | -2.236915               | 2.336711  | -0.973515 |
| 24            | 8             | -1.117606               | 1.855460  | -1.413787 |
| 25            | 1             | 0.983961                | 1.115112  | 2.808072  |
| 26            | 1             | 2.162889                | 2.374370  | 2.515530  |
| 27            | 1             | 3.315762                | 0.926092  | 0.834269  |
| 28            | 1             | 3.268405                | 0.235739  | 2.452842  |
| 29            | 1             | 1.056056                | -0.915411 | 2.848797  |
| 30            | 1             | 2.319022                | -2.100161 | 2.599401  |
| 31            | 1             | 0.898722                | -3.274164 | 0.904191  |
| 32            | 1             | 0.184043                | -3.208263 | 2.511878  |
| 33            | 1             | -0.958750               | -0.964223 | 2.850167  |
| 34            | 1             | -2.137980               | -2.238315 | 2.628292  |
| 35            | 1             | -3.302231               | -0.865006 | 0.884085  |
| 36            | 1             | -3.253976               | -0.110472 | 2.473874  |
| 37            | 1             | -1.036494               | 1.056276  | 2.816861  |
| 38            | 1             | -2.302220               | 2.229031  | 2.527893  |
| 39            | 1             | -0.892388               | 3.338797  | 0.782640  |
| 40            | 1             | -0.165858               | 3.333410  | 2.386504  |

|    |    |           |           |           |
|----|----|-----------|-----------|-----------|
| 41 | 1  | 0.626537  | 3.362092  | -0.621735 |
| 42 | 1  | 3.376528  | -0.609858 | -0.532949 |
| 43 | 1  | -0.628910 | -3.365654 | -0.474602 |
| 44 | 1  | -3.368732 | 0.622500  | -0.545284 |
| 45 | 8  | -0.107835 | -0.435634 | -3.135498 |
| 46 | 1  | 0.495960  | -1.186018 | -2.948469 |
| 47 | 1  | -0.995596 | -0.811626 | -2.955547 |
| 48 | 6  | -4.136415 | 2.174134  | 0.735484  |
| 49 | 1  | -3.818839 | 3.094758  | 1.232126  |
| 50 | 1  | -4.863093 | 2.455774  | -0.029376 |
| 51 | 1  | -4.639299 | 1.532529  | 1.466333  |
| 52 | 6  | -2.137838 | -4.111988 | 0.868892  |
| 53 | 1  | -2.442851 | -4.853283 | 0.127464  |
| 54 | 1  | -1.470771 | -4.599018 | 1.587181  |
| 55 | 1  | -3.041773 | -3.786353 | 1.390629  |
| 56 | 6  | 4.150708  | -2.110337 | 0.804566  |
| 57 | 1  | 3.836962  | -3.012894 | 1.335985  |
| 58 | 1  | 4.878466  | -2.416621 | 0.050440  |
| 59 | 1  | 4.649645  | -1.439389 | 1.511020  |
| 60 | 6  | 2.154628  | 4.160499  | 0.669838  |
| 61 | 1  | 3.065083  | 3.853321  | 1.191300  |
| 62 | 1  | 2.452141  | 4.866698  | -0.108011 |
| 63 | 1  | 1.501096  | 4.683329  | 1.375673  |
| 64 | 8  | -3.407610 | -2.803545 | -1.238047 |
| 65 | 8  | 2.813687  | -3.380394 | -1.286305 |
| 66 | 8  | 3.409604  | 2.731562  | -1.360640 |
| 67 | 8  | -2.760071 | 3.395396  | -1.352859 |
| 68 | 68 | 0.000834  | 0.018096  | -0.597155 |

E(RTPSSh) = -1717.4814698 Hartree

Zero-point correction = 0.562281 Hartree/particle

Sum of electronic and thermal Energies = -1716.884223 Hartree

Sum of electronic and thermal Enthalpies = -1716.883278 Hartree

Sum of electronic and thermal Free Energies = -1716.981486 Hartree

**Table S16.** [Tm(DOTMA)(H<sub>2</sub>O)]<sup>-</sup> [SAP, Δ(λλλ)], TPSSh/LCRECP/6-31G(d,p), aqueous solution (0 Imaginary Frequencies)

| Center Number | Atomic Number | Coordinates (Angstroms) |           |           |
|---------------|---------------|-------------------------|-----------|-----------|
|               |               | X                       | Y         | Z         |
| 1             | 7             | 0.560163                | 2.081800  | 0.944585  |
| 2             | 6             | 1.482452                | 1.678422  | 2.038103  |
| 3             | 6             | 2.590083                | 0.734248  | 1.583883  |
| 4             | 7             | 2.054163                | -0.525793 | 0.997452  |
| 5             | 6             | 1.627843                | -1.429993 | 2.096642  |
| 6             | 6             | 0.690368                | -2.542788 | 1.642169  |
| 7             | 7             | -0.558918               | -2.016031 | 1.025954  |
| 8             | 6             | -1.479260               | -1.566900 | 2.103512  |
| 9             | 6             | -2.587223               | -0.641438 | 1.614058  |
| 10            | 7             | -2.052460               | 0.594403  | 0.979733  |
| 11            | 6             | -1.624358               | 1.542676  | 2.041654  |
| 12            | 6             | -0.687119               | 2.636219  | 1.540053  |
| 13            | 6             | 1.170842                | 3.085920  | 0.008370  |
| 14            | 6             | 2.133250                | 2.401099  | -0.990438 |
| 15            | 8             | 1.770664                | 1.222912  | -1.386398 |
| 16            | 6             | 3.087916                | -1.145024 | 0.100998  |
| 17            | 6             | 2.451920                | -2.124850 | -0.908985 |
| 18            | 8             | 1.265745                | -1.794703 | -1.324513 |
| 19            | 6             | -1.166394               | -3.067573 | 0.142490  |
| 20            | 6             | -2.136868               | -2.450832 | -0.888210 |



|    |    |           |           |           |
|----|----|-----------|-----------|-----------|
| 21 | 8  | -1.793516 | -1.279467 | -1.334048 |
| 22 | 6  | -3.083190 | 1.181829  | 0.058287  |
| 23 | 6  | -2.425398 | 2.123653  | -0.976078 |
| 24 | 8  | -1.262819 | 1.744465  | -1.401010 |
| 25 | 1  | 0.880846  | 1.191936  | 2.809758  |
| 26 | 1  | 1.937367  | 2.555438  | 2.517660  |
| 27 | 1  | 3.213544  | 1.219417  | 0.830524  |
| 28 | 1  | 3.236596  | 0.524170  | 2.448562  |
| 29 | 1  | 1.129090  | -0.816280 | 2.850841  |
| 30 | 1  | 2.493619  | -1.880294 | 2.600728  |
| 31 | 1  | 1.186883  | -3.178201 | 0.906321  |
| 32 | 1  | 0.464852  | -3.176325 | 2.512603  |
| 33 | 1  | -0.875912 | -1.050040 | 2.853985  |
| 34 | 1  | -1.933892 | -2.422588 | 2.620869  |
| 35 | 1  | -3.211747 | -1.153913 | 0.879785  |
| 36 | 1  | -3.233702 | -0.398983 | 2.470218  |
| 37 | 1  | -1.123869 | 0.958922  | 2.818278  |
| 38 | 1  | -2.489970 | 2.012000  | 2.528050  |
| 39 | 1  | -1.184671 | 3.240767  | 0.779474  |
| 40 | 1  | -0.458788 | 3.304706  | 2.382972  |
| 41 | 1  | 0.327950  | 3.405248  | -0.615606 |
| 42 | 1  | 3.417788  | -0.309837 | -0.527792 |
| 43 | 1  | -0.323418 | -3.408260 | -0.470227 |
| 44 | 1  | -3.416066 | 0.325067  | -0.538743 |
| 45 | 8  | -0.066518 | -0.415015 | -3.120031 |
| 46 | 1  | 0.593179  | -1.117530 | -2.937495 |
| 47 | 1  | -0.922626 | -0.860492 | -2.946794 |
| 48 | 69 | -0.001898 | 0.017853  | -0.580528 |
| 49 | 6  | -4.300442 | 1.815824  | 0.738197  |
| 50 | 1  | -4.057123 | 2.764568  | 1.224430  |
| 51 | 1  | -5.052375 | 2.029523  | -0.024353 |
| 52 | 1  | -4.743954 | 1.141496  | 1.478012  |
| 53 | 6  | -1.775254 | -4.274393 | 0.863652  |
| 54 | 1  | -2.006674 | -5.041819 | 0.122363  |
| 55 | 1  | -1.078247 | -4.700223 | 1.592378  |
| 56 | 1  | -2.710414 | -4.025115 | 1.372598  |
| 57 | 6  | 4.307674  | -1.747303 | 0.805914  |
| 58 | 1  | 4.067413  | -2.674521 | 1.333607  |
| 59 | 1  | 5.058311  | -1.991919 | 0.051757  |
| 60 | 1  | 4.750367  | -1.040798 | 1.515201  |
| 61 | 6  | 1.794224  | 4.319013  | 0.669625  |
| 62 | 1  | 2.728401  | 4.084881  | 1.187713  |
| 63 | 1  | 2.032664  | 5.047033  | -0.108545 |
| 64 | 1  | 1.103455  | 4.787141  | 1.378440  |
| 65 | 8  | -3.120719 | -3.097850 | -1.270101 |
| 66 | 8  | 3.097441  | -3.104296 | -1.304197 |
| 67 | 8  | 3.136962  | 3.013006  | -1.386570 |
| 68 | 8  | -3.041609 | 3.125382  | -1.370457 |

E(RTPSSh) = -1718.0612266 Hartree

Zero-point correction = 0.562381 Hartree/particle

Sum of electronic and thermal Energies = -1717.463864 Hartree

Sum of electronic and thermal Enthalpies = -1717.462920 Hartree

Sum of electronic and thermal Free Energies = -1717.561077 Hartree

**Table S17.** [Yb(DOTMA)(H<sub>2</sub>O)]<sup>-</sup> [SAP, Δ(λλλλ)], TPSSh/LCRECP/6-31G(d,p), aqueous solution (0 Imaginary Frequencies)

| Center<br>Number | Atomic<br>Number | Coordinates (Angstroms) |   |   |
|------------------|------------------|-------------------------|---|---|
|                  |                  | X                       | Y | Z |

|    |   |           |           |           |
|----|---|-----------|-----------|-----------|
| 1  | 7 | 0.519596  | 2.088931  | 0.949207  |
| 2  | 6 | 1.450587  | 1.704343  | 2.042247  |
| 3  | 6 | 2.575231  | 0.779717  | 1.588399  |
| 4  | 7 | 2.061915  | -0.488921 | 1.001127  |
| 5  | 6 | 1.654901  | -1.402141 | 2.100198  |
| 6  | 6 | 0.738033  | -2.531525 | 1.644158  |
| 7  | 7 | -0.520128 | -2.025509 | 1.028914  |
| 8  | 6 | -1.449428 | -1.597473 | 2.107541  |
| 9  | 6 | -2.574019 | -0.691357 | 1.618513  |
| 10 | 7 | -2.060971 | 0.553163  | 0.983244  |
| 11 | 6 | -1.654362 | 1.510227  | 2.045809  |
| 12 | 6 | -0.736614 | 2.621029  | 1.545363  |
| 13 | 6 | 1.111490  | 3.101826  | 0.010997  |
| 14 | 6 | 2.083050  | 2.430503  | -0.987047 |
| 15 | 8 | 1.742474  | 1.242526  | -1.372400 |
| 16 | 6 | 3.103956  | -1.087818 | 0.101235  |
| 17 | 6 | 2.482252  | -2.068895 | -0.915683 |
| 18 | 8 | 1.285833  | -1.760899 | -1.319472 |
| 19 | 6 | -1.107005 | -3.083700 | 0.139387  |
| 20 | 6 | -2.086571 | -2.478131 | -0.888918 |
| 21 | 8 | -1.762986 | -1.297702 | -1.326506 |
| 22 | 6 | -3.099322 | 1.120586  | 0.058293  |
| 23 | 6 | -2.455414 | 2.069389  | -0.978162 |
| 24 | 8 | -1.280626 | 1.715012  | -1.391285 |
| 25 | 1 | 0.858934  | 1.208269  | 2.815352  |
| 26 | 1 | 1.890364  | 2.590113  | 2.519899  |
| 27 | 1 | 3.191505  | 1.276200  | 0.836560  |
| 28 | 1 | 3.224313  | 0.580291  | 2.453761  |
| 29 | 1 | 1.144945  | -0.799069 | 2.855342  |
| 30 | 1 | 2.530093  | -1.836054 | 2.602248  |
| 31 | 1 | 1.246225  | -3.156423 | 0.907208  |
| 32 | 1 | 0.523372  | -3.171143 | 2.512833  |
| 33 | 1 | -0.856759 | -1.070561 | 2.859483  |
| 34 | 1 | -1.887996 | -2.463329 | 2.621683  |
| 35 | 1 | -3.190229 | -1.215280 | 0.885419  |
| 36 | 1 | -3.223916 | -0.459124 | 2.474891  |
| 37 | 1 | -1.144369 | 0.936902  | 2.823745  |
| 38 | 1 | -2.529888 | 1.963223  | 2.529850  |
| 39 | 1 | -1.245045 | 3.217901  | 0.786039  |
| 40 | 1 | -0.519692 | 3.292410  | 2.389051  |
| 41 | 1 | 0.263024  | 3.405469  | -0.613069 |
| 42 | 1 | 3.422482  | -0.244803 | -0.522942 |
| 43 | 1 | -0.257554 | -3.405203 | -0.474858 |
| 44 | 1 | -3.416409 | 0.257434  | -0.537934 |
| 45 | 8 | -0.059055 | -0.399397 | -3.112482 |
| 46 | 1 | 0.613507  | -1.089548 | -2.929972 |
| 47 | 1 | -0.906768 | -0.860763 | -2.938896 |
| 48 | 6 | -4.328833 | 1.735888  | 0.733148  |
| 49 | 1 | -4.102053 | 2.687384  | 1.221646  |
| 50 | 1 | -5.079903 | 1.939340  | -0.032954 |
| 51 | 1 | -4.765973 | 1.054460  | 1.470234  |
| 52 | 6 | -1.694805 | -4.305414 | 0.852573  |
| 53 | 1 | -1.915204 | -5.070859 | 0.105818  |
| 54 | 1 | -0.989648 | -4.724843 | 1.577052  |
| 55 | 1 | -2.632856 | -4.075029 | 1.364855  |
| 56 | 6 | 4.332195  | -1.677207 | 0.802145  |
| 57 | 1 | 4.104883  | -2.610746 | 1.324164  |
| 58 | 1 | 5.086577  | -1.905857 | 0.046745  |
| 59 | 1 | 4.763739  | -0.968841 | 1.516410  |
| 60 | 6 | 1.715139  | 4.346172  | 0.668960  |
| 61 | 1 | 2.654248  | 4.128588  | 1.185018  |
| 62 | 1 | 1.939022  | 5.077062  | -0.110741 |

|    |    |           |           |           |
|----|----|-----------|-----------|-----------|
| 63 | 1  | 1.018469  | 4.803638  | 1.378957  |
| 64 | 8  | -3.058462 | -3.139033 | -1.277497 |
| 65 | 8  | 3.146569  | -3.027921 | -1.329091 |
| 66 | 8  | 3.071069  | 3.060324  | -1.394590 |
| 67 | 8  | -3.091097 | 3.053883  | -1.385212 |
| 68 | 70 | -0.001812 | 0.018067  | -0.572957 |

E(RTPSSh) = -1718.6447604 Hartree

Zero-point correction = 0.562353 Hartree/particle

Sum of electronic and thermal Energies = -1718.047409 Hartree

Sum of electronic and thermal Enthalpies = -1718.046465 Hartree

Sum of electronic and thermal Free Energies = -1718.144744 Hartree

**Table S18.** [Lu(DOTMA)(H<sub>2</sub>O)]<sup>-</sup> [SAP, Δ(λλλλ)], TPSSh/LCRECP/6-31G(d,p), aqueous solution (0 Imaginary Frequencies)

| Center Number | Atomic Number | Coordinates (Angstroms) |           |           |
|---------------|---------------|-------------------------|-----------|-----------|
|               |               | X                       | Y         | Z         |
| 1             | 7             | 0.581246                | 2.066652  | 0.953409  |
| 2             | 6             | 1.498922                | 1.657242  | 2.047717  |
| 3             | 6             | 2.595586                | 0.701879  | 1.592238  |
| 4             | 7             | 2.040383                | -0.548232 | 1.003543  |
| 5             | 6             | 1.610220                | -1.449768 | 2.103190  |
| 6             | 6             | 0.661136                | -2.550550 | 1.645454  |
| 7             | 7             | -0.579552               | -2.003351 | 1.030157  |
| 8             | 6             | -1.495338               | -1.551348 | 2.110230  |
| 9             | 6             | -2.592188               | -0.613462 | 1.620154  |
| 10            | 7             | -2.037979               | 0.613757  | 0.986019  |
| 11            | 6             | -1.606012               | 1.557308  | 2.050048  |
| 12            | 6             | -0.657013               | 2.639997  | 1.548678  |
| 13            | 6             | 1.204641                | 3.059273  | 0.013243  |
| 14            | 6             | 2.150748                | 2.355873  | -0.987335 |
| 15            | 8             | 1.771263                | 1.178814  | -1.370833 |
| 16            | 6             | 3.063037                | -1.178571 | 0.102037  |
| 17            | 6             | 2.409605                | -2.139339 | -0.913919 |
| 18            | 8             | 1.221778                | -1.795122 | -1.314664 |
| 19            | 6             | -1.199946               | -3.043331 | 0.141722  |
| 20            | 6             | -2.155752               | -2.406636 | -0.889393 |
| 21            | 8             | -1.795876               | -1.234987 | -1.322553 |
| 22            | 6             | -3.057196               | 1.213860  | 0.059702  |
| 23            | 6             | -2.381801               | 2.139280  | -0.977540 |
| 24            | 8             | -1.218676               | 1.746592  | -1.389243 |
| 25            | 1             | 0.892774                | 1.176759  | 2.819830  |
| 26            | 1             | 1.961981                | 2.530567  | 2.526200  |
| 27            | 1             | 3.225701                | 1.180844  | 0.840386  |
| 28            | 1             | 3.239380                | 0.480158  | 2.455888  |
| 29            | 1             | 1.117474                | -0.832435 | 2.858503  |
| 30            | 1             | 2.473276                | -1.908206 | 2.604286  |
| 31            | 1             | 1.150454                | -3.189454 | 0.907698  |
| 32            | 1             | 0.425774                | -3.184547 | 2.512727  |
| 33            | 1             | -0.887059               | -1.040939 | 2.861240  |
| 34            | 1             | -1.957334               | -2.404753 | 2.624433  |
| 35            | 1             | -3.222784               | -1.118426 | 0.885854  |
| 36            | 1             | -3.236209               | -0.360943 | 2.475097  |
| 37            | 1             | -1.112112               | 0.968998  | 2.827602  |
| 38            | 1             | -2.468832               | 2.034027  | 2.533971  |
| 39            | 1             | -1.147334               | 3.250869  | 0.788440  |
| 40            | 1             | -0.418780               | 3.305802  | 2.390900  |
| 41            | 1             | 0.365407                | 3.390465  | -0.609259 |
| 42            | 1             | 3.406273                | -0.345444 | -0.522162 |

|    |    |           |           |           |
|----|----|-----------|-----------|-----------|
| 43 | 1  | -0.360923 | -3.395394 | -0.469848 |
| 44 | 1  | -3.402314 | 0.360743  | -0.535338 |
| 45 | 8  | -0.069545 | -0.391308 | -3.109447 |
| 46 | 1  | 0.579747  | -1.103168 | -2.925751 |
| 47 | 1  | -0.931719 | -0.824762 | -2.936522 |
| 48 | 71 | -0.001621 | 0.017545  | -0.570682 |
| 49 | 6  | -4.265710 | 1.870756  | 0.733294  |
| 50 | 1  | -4.008004 | 2.816107  | 1.218460  |
| 51 | 1  | -5.010445 | 2.095701  | -0.033002 |
| 52 | 1  | -4.724102 | 1.206109  | 1.472803  |
| 53 | 6  | -1.830728 | -4.242474 | 0.856588  |
| 54 | 1  | -2.072413 | -5.003146 | 0.111551  |
| 55 | 1  | -1.142836 | -4.682225 | 1.585665  |
| 56 | 1  | -2.763135 | -3.979906 | 1.363744  |
| 57 | 6  | 4.273113  | -1.806385 | 0.801154  |
| 58 | 1  | 4.017795  | -2.733046 | 1.322571  |
| 59 | 1  | 5.019139  | -2.057435 | 0.044564  |
| 60 | 1  | 4.727453  | -1.112412 | 1.515421  |
| 61 | 6  | 1.851086  | 4.282821  | 0.669456  |
| 62 | 1  | 2.783207  | 4.034028  | 1.184206  |
| 63 | 1  | 2.098288  | 5.005224  | -0.111138 |
| 64 | 1  | 1.171289  | 4.763953  | 1.380137  |
| 65 | 8  | -3.145357 | -3.037089 | -1.283476 |
| 66 | 8  | 3.042815  | -3.118602 | -1.328602 |
| 67 | 8  | 3.158216  | 2.952301  | -1.397415 |
| 68 | 8  | -2.984758 | 3.143183  | -1.386636 |

E(RTPSSh) = -1719.1985484 Hartree

Zero-point correction = 0.562662 Hartree/particle

Sum of electronic and thermal Energies = -1718.601020 Hartree

Sum of electronic and thermal Enthalpies = -1718.600076 Hartree

Sum of electronic and thermal Free Energies = -1718.697968 Hartree

**Table S19.** [La(DOTMA)(H<sub>2</sub>O)]<sup>-</sup> [TSAP, Δ(δδδδ)], TPSSh/LCRECP/6-31G(d,p), aqueous solution (0 Imaginary Frequencies)

| Center Number | Atomic Number | Coordinates (Angstroms) |           |           |
|---------------|---------------|-------------------------|-----------|-----------|
|               |               | X                       | Y         | Z         |
| 1             | 7             | -1.914280               | -0.886111 | 1.144210  |
| 2             | 6             | -1.272339               | -1.674306 | 2.228033  |
| 3             | 6             | -0.163612               | -2.607231 | 1.740963  |
| 4             | 7             | 0.982366                | -1.893400 | 1.113559  |
| 5             | 6             | 1.826187                | -1.253980 | 2.156474  |
| 6             | 6             | 2.732021                | -0.142390 | 1.627298  |
| 7             | 7             | 1.987124                | 0.994450  | 1.019820  |
| 8             | 6             | 1.396892                | 1.855364  | 2.074949  |
| 9             | 6             | 0.262909                | 2.754388  | 1.580525  |
| 10            | 7             | -0.904754               | 2.004004  | 1.040965  |
| 11            | 6             | -1.706917               | 1.423268  | 2.147488  |
| 12            | 6             | -2.633365               | 0.288267  | 1.711331  |
| 13            | 6             | -2.843004               | -1.721479 | 0.317403  |
| 14            | 6             | -3.245923               | -0.963228 | -0.977100 |
| 15            | 8             | -2.394092               | -0.078404 | -1.405030 |
| 16            | 6             | 1.771129                | -2.824257 | 0.244204  |
| 17            | 6             | 0.961370                | -3.212490 | -1.024063 |
| 18            | 8             | 0.004057                | -2.399794 | -1.361479 |
| 19            | 6             | 2.870681                | 1.759415  | 0.082470  |
| 20            | 6             | 3.208381                | 0.883956  | -1.159921 |
| 21            | 8             | 2.348048                | -0.039701 | -1.454716 |
| 22            | 6             | -1.725309               | 2.881216  | 0.145140  |

|    |    |           |           |           |
|----|----|-----------|-----------|-----------|
| 23 | 6  | -0.935965 | 3.202181  | -1.157345 |
| 24 | 8  | -0.039885 | 2.333393  | -1.506414 |
| 25 | 1  | -0.867673 | -0.967073 | 2.956456  |
| 26 | 1  | -2.011940 | -2.276781 | 2.773447  |
| 27 | 1  | -0.562755 | -3.302152 | 0.997623  |
| 28 | 1  | 0.169713  | -3.208285 | 2.599293  |
| 29 | 1  | 1.157909  | -0.851409 | 2.921799  |
| 30 | 1  | 2.455892  | -1.995342 | 2.667852  |
| 31 | 1  | 3.400674  | -0.543225 | 0.861178  |
| 32 | 1  | 3.364345  | 0.200929  | 2.458883  |
| 33 | 1  | 1.027543  | 1.198214  | 2.866518  |
| 34 | 1  | 2.159812  | 2.492449  | 2.544011  |
| 35 | 1  | 0.628334  | 3.407442  | 0.783653  |
| 36 | 1  | -0.039562 | 3.402905  | 2.415440  |
| 37 | 1  | -1.008149 | 1.058260  | 2.904463  |
| 38 | 1  | -2.315796 | 2.191269  | 2.644665  |
| 39 | 1  | -3.327532 | 0.648425  | 0.947227  |
| 40 | 1  | -3.237371 | -0.003885 | 2.582429  |
| 41 | 1  | -2.240844 | -2.567129 | -0.039899 |
| 42 | 1  | 2.607599  | -2.228058 | -0.141717 |
| 43 | 1  | 2.250481  | 2.575416  | -0.310346 |
| 44 | 1  | -2.568091 | 2.260601  | -0.185915 |
| 45 | 8  | -0.528723 | -0.599708 | -3.274954 |
| 46 | 1  | -0.360031 | -1.525791 | -2.988754 |
| 47 | 1  | -1.465625 | -0.446480 | -3.020160 |
| 48 | 57 | 0.010043  | 0.012492  | -0.642959 |
| 49 | 6  | 4.137574  | 2.360129  | 0.704540  |
| 50 | 1  | 4.798845  | 1.586074  | 1.105022  |
| 51 | 1  | 4.683506  | 2.888121  | -0.078937 |
| 52 | 1  | 3.906344  | 3.070828  | 1.503514  |
| 53 | 6  | -2.281489 | 4.157002  | 0.790372  |
| 54 | 1  | -1.481729 | 4.825807  | 1.121866  |
| 55 | 1  | -2.866783 | 4.689515  | 0.039067  |
| 56 | 1  | -2.931109 | 3.938296  | 1.643070  |
| 57 | 6  | -4.075727 | -2.270124 | 1.047968  |
| 58 | 1  | -4.727705 | -1.466645 | 1.403079  |
| 59 | 1  | -4.649075 | -2.873307 | 0.342288  |
| 60 | 1  | -3.803899 | -2.901845 | 1.898453  |
| 61 | 6  | 2.335874  | -4.069594 | 0.941913  |
| 62 | 1  | 1.540991  | -4.713726 | 1.329547  |
| 63 | 1  | 2.899004  | -4.644659 | 0.205183  |
| 64 | 1  | 3.008528  | -3.810956 | 1.764845  |
| 65 | 8  | -4.300667 | -1.270585 | -1.546152 |
| 66 | 8  | -1.234792 | 4.221934  | -1.795038 |
| 67 | 8  | 4.234175  | 1.142518  | -1.805133 |
| 68 | 8  | 1.294915  | -4.223289 | -1.655111 |

E(RTPSSh) = -1710.8237971 Hartree

Zero-point correction = 0.560730 Hartree/particle

Sum of electronic and thermal Energies = -1710.227515 Hartree

Sum of electronic and thermal Enthalpies = -1710.226571 Hartree

Sum of electronic and thermal Free Energies = -1710.327730 Hartree

**Table S20.** [Ce(DOTMA)(H<sub>2</sub>O)]<sup>-</sup> [TSAP, Δ(δδδδ)], TPSSh/LCRECP/6-31G(d,p), aqueous solution (0 Imaginary Frequencies)

| Center Number | Atomic Number | Coordinates (Angstroms) |           |          |
|---------------|---------------|-------------------------|-----------|----------|
|               |               | X                       | Y         | Z        |
| 1             | 7             | -1.878037               | -0.955826 | 1.141257 |
| 2             | 6             | -1.216939               | -1.728383 | 2.224614 |

|    |   |           |           |           |
|----|---|-----------|-----------|-----------|
| 3  | 6 | -0.074024 | -2.618430 | 1.737579  |
| 4  | 7 | 1.043804  | -1.858464 | 1.113599  |
| 5  | 6 | 1.862890  | -1.194878 | 2.160211  |
| 6  | 6 | 2.729755  | -0.051541 | 1.634720  |
| 7  | 7 | 1.943976  | 1.057380  | 1.028347  |
| 8  | 6 | 1.327249  | 1.897321  | 2.085287  |
| 9  | 6 | 0.162272  | 2.754935  | 1.591866  |
| 10 | 7 | -0.974704 | 1.960979  | 1.049751  |
| 11 | 6 | -1.760305 | 1.354066  | 2.153517  |
| 12 | 6 | -2.643215 | 0.187071  | 1.712149  |
| 13 | 6 | -2.771469 | -1.818003 | 0.302714  |
| 14 | 6 | -3.189079 | -1.066395 | -0.990140 |
| 15 | 8 | -2.366098 | -0.146697 | -1.402006 |
| 16 | 6 | 1.865623  | -2.753361 | 0.237553  |
| 17 | 6 | 1.067324  | -3.159771 | -1.031522 |
| 18 | 8 | 0.088671  | -2.371127 | -1.365606 |
| 19 | 6 | 2.798656  | 1.852544  | 0.089439  |
| 20 | 6 | 3.147761  | 0.998594  | -1.164046 |
| 21 | 8 | 2.314040  | 0.050289  | -1.456588 |
| 22 | 6 | -1.821878 | 2.806998  | 0.148262  |
| 23 | 6 | -1.038647 | 3.148243  | -1.151790 |
| 24 | 8 | -0.116927 | 2.304344  | -1.495425 |
| 25 | 1 | -0.838182 | -1.010873 | 2.957004  |
| 26 | 1 | -1.938910 | -2.357454 | 2.763362  |
| 27 | 1 | -0.445970 | -3.327171 | 0.993177  |
| 28 | 1 | 0.281292  | -3.207960 | 2.595030  |
| 29 | 1 | 1.177869  | -0.815410 | 2.922573  |
| 30 | 1 | 2.515663  | -1.915537 | 2.672211  |
| 31 | 1 | 3.414602  | -0.426322 | 0.869679  |
| 32 | 1 | 3.347530  | 0.313411  | 2.467947  |
| 33 | 1 | 0.981648  | 1.227563  | 2.876918  |
| 34 | 1 | 2.068377  | 2.560665  | 2.552974  |
| 35 | 1 | 0.504385  | 3.422545  | 0.796674  |
| 36 | 1 | -0.165255 | 3.390465  | 2.427147  |
| 37 | 1 | -1.052537 | 1.013280  | 2.913517  |
| 38 | 1 | -2.398321 | 2.100196  | 2.647396  |
| 39 | 1 | -3.349472 | 0.523798  | 0.948434  |
| 40 | 1 | -3.237042 | -0.131940 | 2.580746  |
| 41 | 1 | -2.137999 | -2.639553 | -0.055673 |
| 42 | 1 | 2.678137  | -2.124033 | -0.146690 |
| 43 | 1 | 2.153778  | 2.654167  | -0.292379 |
| 44 | 1 | -2.641279 | 2.157263  | -0.184876 |
| 45 | 8 | -0.462670 | -0.560607 | -3.254586 |
| 46 | 1 | -0.266500 | -1.486134 | -2.984752 |
| 47 | 1 | -1.408254 | -0.446316 | -3.012363 |
| 48 | 6 | 4.054283  | 2.482629  | 0.705294  |
| 49 | 1 | 4.741974  | 1.723665  | 1.089975  |
| 50 | 1 | 4.576417  | 3.035019  | -0.077561 |
| 51 | 1 | 3.811053  | 3.176623  | 1.515204  |
| 52 | 6 | -2.422533 | 4.065342  | 0.787277  |
| 53 | 1 | -1.646619 | 4.759531  | 1.123183  |
| 54 | 1 | -3.019214 | 4.577988  | 0.031109  |
| 55 | 1 | -3.070268 | 3.827163  | 1.636094  |
| 56 | 6 | -3.989614 | -2.412194 | 1.021533  |
| 57 | 1 | -4.662285 | -1.632664 | 1.391137  |
| 58 | 1 | -4.546275 | -3.016215 | 0.303276  |
| 59 | 1 | -3.701459 | -3.051949 | 1.860560  |
| 60 | 6 | 2.476340  | -3.981480 | 0.926223  |
| 61 | 1 | 1.705846  | -4.652291 | 1.317750  |
| 62 | 1 | 3.051932  | -4.535446 | 0.182971  |
| 63 | 1 | 3.145961  | -3.703265 | 1.745175  |
| 64 | 8 | -4.223683 | -1.410078 | -1.575110 |

|    |    |           |           |           |
|----|----|-----------|-----------|-----------|
| 65 | 8  | -1.363437 | 4.157662  | -1.792901 |
| 66 | 8  | 4.157467  | 1.293921  | -1.819002 |
| 67 | 8  | 1.428804  | -4.157012 | -1.668286 |
| 68 | 58 | 0.006691  | 0.012471  | -0.624241 |

E(RTPSSh) = -1711.4756591 Hartree

Zero-point correction = 0.561012 Hartree/particle

Sum of electronic and thermal Energies = -1710.879121 Hartree

Sum of electronic and thermal Enthalpies = -1710.878177 Hartree

Sum of electronic and thermal Free Energies = -1710.979323 Hartree

**Table S21.** [Pr(DOTMA)(H<sub>2</sub>O)]<sup>-</sup> [TSAP, Δ(δδδδ)], TPSSh/LCRECP/6-31G(d,p), aqueous solution (0 Imaginary Frequencies)

| Center Number | Atomic Number | Coordinates (Angstroms) |           |           |
|---------------|---------------|-------------------------|-----------|-----------|
|               |               | X                       | Y         | Z         |
| 1             | 7             | -1.886907               | -0.925272 | 1.140815  |
| 2             | 6             | -1.244894               | -1.712864 | 2.224052  |
| 3             | 6             | -0.115570               | -2.618456 | 1.736798  |
| 4             | 7             | 1.009644                | -1.870060 | 1.113187  |
| 5             | 6             | 1.842124                | -1.227090 | 2.161654  |
| 6             | 6             | 2.725269                | -0.096644 | 1.637309  |
| 7             | 7             | 1.951140                | 1.020827  | 1.032449  |
| 8             | 6             | 1.353952                | 1.869736  | 2.093138  |
| 9             | 6             | 0.203400                | 2.745952  | 1.601868  |
| 10            | 7             | -0.939969               | 1.965389  | 1.055216  |
| 11            | 6             | -1.737596               | 1.375086  | 2.159033  |
| 12            | 6             | -2.638596               | 0.223815  | 1.716038  |
| 13            | 6             | -2.788533               | -1.770041 | 0.293194  |
| 14            | 6             | -3.191086               | -1.000407 | -0.993033 |
| 15            | 8             | -2.349364               | -0.093265 | -1.395843 |
| 16            | 6             | 1.815610                | -2.771825 | 0.229125  |
| 17            | 6             | 1.001800                | -3.162364 | -1.034378 |
| 18            | 8             | 0.041534                | -2.349368 | -1.365401 |
| 19            | 6             | 2.811595                | 1.803292  | 0.087808  |
| 20            | 6             | 3.148787                | 0.935530  | -1.158641 |
| 21            | 8             | 2.294388                | 0.004762  | -1.449816 |
| 22            | 6             | -1.770997               | 2.820720  | 0.147421  |
| 23            | 6             | -0.974129               | 3.146032  | -1.147998 |
| 24            | 8             | -0.065337               | 2.284772  | -1.484943 |
| 25            | 1             | -0.857480               | -1.005639 | 2.961790  |
| 26            | 1             | -1.980169               | -2.331720 | 2.756416  |
| 27            | 1             | -0.496944               | -3.322230 | 0.992381  |
| 28            | 1             | 0.233676                | -3.213295 | 2.592999  |
| 29            | 1             | 1.166135                | -0.839510 | 2.928088  |
| 30            | 1             | 2.483413                | -1.961940 | 2.667760  |
| 31            | 1             | 3.405153                | -0.479905 | 0.871926  |
| 32            | 1             | 3.348401                | 0.261143  | 2.469546  |
| 33            | 1             | 0.998958                | 1.205043  | 2.885028  |
| 34            | 1             | 2.108647                | 2.518885  | 2.558922  |
| 35            | 1             | 0.555877                | 3.412547  | 0.810336  |
| 36            | 1             | -0.119662               | 3.382501  | 2.438054  |
| 37            | 1             | -1.036924               | 1.023202  | 2.920598  |
| 38            | 1             | -2.362718               | 2.133661  | 2.650387  |
| 39            | 1             | -3.341487               | 0.573297  | 0.955023  |
| 40            | 1             | -3.235496               | -0.091345 | 2.583882  |
| 41            | 1             | -2.163736               | -2.596203 | -0.069795 |
| 42            | 1             | 2.632369                | -2.150232 | -0.158127 |
| 43            | 1             | 2.172337                | 2.607249  | -0.298555 |
| 44            | 1             | -2.597357               | 2.181490  | -0.188469 |

|    |    |           |           |           |
|----|----|-----------|-----------|-----------|
| 45 | 8  | -0.451411 | -0.511595 | -3.240152 |
| 46 | 1  | -0.278528 | -1.445097 | -2.982797 |
| 47 | 1  | -1.396484 | -0.380069 | -3.004841 |
| 48 | 6  | 4.073870  | 2.425699  | 0.696845  |
| 49 | 1  | 4.753908  | 1.663834  | 1.089351  |
| 50 | 1  | 4.601112  | 2.963572  | -0.092739 |
| 51 | 1  | 3.838652  | 3.131492  | 1.498917  |
| 52 | 6  | -2.356751 | 4.089424  | 0.779327  |
| 53 | 1  | -1.573327 | 4.773551  | 1.118492  |
| 54 | 1  | -2.940745 | 4.608518  | 0.017604  |
| 55 | 1  | -3.014012 | 3.863411  | 1.624202  |
| 56 | 6  | -4.017305 | -2.353816 | 1.002283  |
| 57 | 1  | -4.683671 | -1.568772 | 1.371559  |
| 58 | 1  | -4.576522 | -2.948607 | 0.278253  |
| 59 | 1  | -3.741744 | -3.001233 | 1.839597  |
| 60 | 6  | 2.416311  | -4.009592 | 0.908691  |
| 61 | 1  | 1.641311  | -4.672385 | 1.304910  |
| 62 | 1  | 2.978209  | -4.568294 | 0.158470  |
| 63 | 1  | 3.097227  | -3.742690 | 1.722113  |
| 64 | 8  | -4.233684 | -1.314709 | -1.579961 |
| 65 | 8  | -1.275465 | 4.160077  | -1.793099 |
| 66 | 8  | 4.167218  | 1.203703  | -1.811563 |
| 67 | 8  | 1.332082  | -4.170869 | -1.670014 |
| 68 | 59 | 0.007136  | 0.011837  | -0.613218 |

E(RTPSSh) = -1712.1107368 Hartree

Zero-point correction = 0.561138 Hartree/particle

Sum of electronic and thermal Energies = -1711.514132 Hartree

Sum of electronic and thermal Enthalpies = -1711.513188 Hartree

Sum of electronic and thermal Free Energies = -1711.614117 Hartree

**Table S22.** [Nd(DOTMA)(H<sub>2</sub>O)]<sup>-</sup> [TSAP, Δ(δδδδ)], TPSSh/LCRECP/6-31G(d,p), aqueous solution (0 Imaginary Frequencies)

| Center Number | Atomic Number | Coordinates (Angstroms) |           |           |
|---------------|---------------|-------------------------|-----------|-----------|
|               |               | X                       | Y         | Z         |
| 1             | 7             | -1.893867               | -0.913947 | 1.138262  |
| 2             | 6             | -1.264478               | -1.710181 | 2.222805  |
| 3             | 6             | -0.140357               | -2.621549 | 1.734679  |
| 4             | 7             | 0.990293                | -1.878438 | 1.114055  |
| 5             | 6             | 1.829867                | -1.247932 | 2.164529  |
| 6             | 6             | 2.717593                | -0.120828 | 1.642069  |
| 7             | 7             | 1.948152                | 1.001069  | 1.037843  |
| 8             | 6             | 1.358781                | 1.853748  | 2.099793  |
| 9             | 6             | 0.215392                | 2.738522  | 1.608553  |
| 10            | 7             | -0.930371               | 1.964241  | 1.057189  |
| 11            | 6             | -1.739649               | 1.383785  | 2.157936  |
| 12            | 6             | -2.644066               | 0.237593  | 1.710520  |
| 13            | 6             | -2.795667               | -1.747373 | 0.279920  |
| 14            | 6             | -3.174182               | -0.969554 | -1.008380 |
| 15            | 8             | -2.324048               | -0.061321 | -1.390516 |
| 16            | 6             | 1.786849                | -2.783877 | 0.225602  |
| 17            | 6             | 0.972434                | -3.149073 | -1.044550 |
| 18            | 8             | 0.015810                | -2.326283 | -1.362227 |
| 19            | 6             | 2.814264                | 1.777734  | 0.093653  |
| 20            | 6             | 3.137882                | 0.907380  | -1.153633 |
| 21            | 8             | 2.275840                | -0.018983 | -1.436892 |
| 22            | 6             | -1.748537               | 2.824162  | 0.142208  |
| 23            | 6             | -0.937586               | 3.136345  | -1.146855 |
| 24            | 8             | -0.034648               | 2.264090  | -1.471153 |



|    |    |           |           |           |
|----|----|-----------|-----------|-----------|
| 25 | 1  | -0.875113 | -1.007913 | 2.964735  |
| 26 | 1  | -2.007352 | -2.325536 | 2.748832  |
| 27 | 1  | -0.526218 | -3.319084 | 0.986845  |
| 28 | 1  | 0.204634  | -3.222408 | 2.588301  |
| 29 | 1  | 1.158189  | -0.861165 | 2.935373  |
| 30 | 1  | 2.468191  | -1.990095 | 2.663714  |
| 31 | 1  | 3.394925  | -0.507087 | 0.876120  |
| 32 | 1  | 3.342625  | 0.233632  | 2.474221  |
| 33 | 1  | 0.996872  | 1.190191  | 2.889545  |
| 34 | 1  | 2.119349  | 2.495033  | 2.566713  |
| 35 | 1  | 0.573974  | 3.404912  | 0.819740  |
| 36 | 1  | -0.106153 | 3.374969  | 2.445353  |
| 37 | 1  | -1.045869 | 1.027723  | 2.924078  |
| 38 | 1  | -2.361804 | 2.148509  | 2.643381  |
| 39 | 1  | -3.339785 | 0.591047  | 0.944964  |
| 40 | 1  | -3.247876 | -0.075508 | 2.574260  |
| 41 | 1  | -2.177539 | -2.580076 | -0.078496 |
| 42 | 1  | 2.615573  | -2.172678 | -0.152204 |
| 43 | 1  | 2.182973  | 2.588755  | -0.290626 |
| 44 | 1  | -2.577884 | 2.191298  | -0.197875 |
| 45 | 8  | -0.414342 | -0.461612 | -3.217634 |
| 46 | 1  | -0.257004 | -1.401003 | -2.972525 |
| 47 | 1  | -1.361019 | -0.323148 | -2.993124 |
| 48 | 60 | 0.009473  | 0.012587  | -0.592141 |
| 49 | 6  | 4.084169  | 2.384502  | 0.702398  |
| 50 | 1  | 4.756217  | 1.613870  | 1.091450  |
| 51 | 1  | 4.616267  | 2.920014  | -0.085587 |
| 52 | 1  | 3.857836  | 3.090042  | 1.507337  |
| 53 | 6  | -2.325497 | 4.100040  | 0.767473  |
| 54 | 1  | -1.537073 | 4.777053  | 1.109274  |
| 55 | 1  | -2.900924 | 4.623155  | 0.001935  |
| 56 | 1  | -2.989233 | 3.882289  | 1.609441  |
| 57 | 6  | -4.038960 | -2.318123 | 0.973858  |
| 58 | 1  | -4.703149 | -1.526527 | 1.332927  |
| 59 | 1  | -4.593923 | -2.909362 | 0.243607  |
| 60 | 1  | -3.779697 | -2.966197 | 1.815877  |
| 61 | 6  | 2.363924  | -4.037605 | 0.896266  |
| 62 | 1  | 1.576173  | -4.696404 | 1.273526  |
| 63 | 1  | 2.929758  | -4.592942 | 0.146410  |
| 64 | 1  | 3.036925  | -3.789268 | 1.722040  |
| 65 | 8  | -4.204958 | -1.280592 | -1.617373 |
| 66 | 8  | -1.219458 | 4.152682  | -1.797158 |
| 67 | 8  | 4.151707  | 1.170299  | -1.815841 |
| 68 | 8  | 1.298630  | -4.148039 | -1.696906 |

E(RTPSSh) = -1712.7334131 Hartree

Zero-point correction = 0.561120 Hartree/particle

Sum of electronic and thermal Energies = -1712.136829 Hartree

Sum of electronic and thermal Enthalpies = -1712.135885 Hartree

Sum of electronic and thermal Free Energies = -1712.236808 Hartree

**Table S23.** [Sm(DOTMA)(H<sub>2</sub>O)]<sup>-</sup> [TSAP, Δ(δδδδ)], TPSSh/LCRECP/6-31G(d,p), aqueous solution (0 Imaginary Frequencies)

| Center Number | Atomic Number | Coordinates (Angstroms) |           |          |
|---------------|---------------|-------------------------|-----------|----------|
|               |               | X                       | Y         | Z        |
| 1             | 7             | -1.721883               | -1.203526 | 1.133408 |
| 2             | 6             | -0.983300               | -1.898035 | 2.217766 |
| 3             | 6             | 0.271966                | -2.614938 | 1.727580 |
| 4             | 7             | 1.266120                | -1.693267 | 1.112139 |

|    |   |           |           |           |
|----|---|-----------|-----------|-----------|
| 5  | 6 | 1.994608  | -0.947062 | 2.169036  |
| 6  | 6 | 2.693408  | 0.306556  | 1.650245  |
| 7  | 7 | 1.752152  | 1.287617  | 1.042403  |
| 8  | 6 | 1.042355  | 2.041510  | 2.105699  |
| 9  | 6 | -0.226273 | 2.731768  | 1.612294  |
| 10 | 7 | -1.227364 | 1.778568  | 1.057706  |
| 11 | 6 | -1.939378 | 1.082895  | 2.158473  |
| 12 | 6 | -2.650186 | -0.190313 | 1.707278  |
| 13 | 6 | -2.475634 | -2.161745 | 0.262639  |
| 14 | 6 | -2.955033 | -1.437188 | -1.021370 |
| 15 | 8 | -2.251885 | -0.401023 | -1.375410 |
| 16 | 6 | 2.194598  | -2.453942 | 0.215455  |
| 17 | 6 | 1.437468  | -2.930052 | -1.051961 |
| 18 | 8 | 0.369105  | -2.253342 | -1.358174 |
| 19 | 6 | 2.481761  | 2.185719  | 0.090828  |
| 20 | 6 | 2.940139  | 1.358505  | -1.141640 |
| 21 | 8 | 2.215740  | 0.319367  | -1.420210 |
| 22 | 6 | -2.166356 | 2.490487  | 0.131823  |
| 23 | 6 | -1.393661 | 2.930204  | -1.141378 |
| 24 | 8 | -0.373175 | 2.195131  | -1.457327 |
| 25 | 1 | -0.712200 | -1.149405 | 2.966689  |
| 26 | 1 | -1.622758 | -2.627012 | 2.734433  |
| 27 | 1 | 0.002687  | -3.360967 | 0.975779  |
| 28 | 1 | 0.711066  | -3.157206 | 2.577066  |
| 29 | 1 | 1.269207  | -0.670990 | 2.938691  |
| 30 | 1 | 2.739804  | -1.582810 | 2.666964  |
| 31 | 1 | 3.427504  | 0.033318  | 0.888239  |
| 32 | 1 | 3.249339  | 0.758862  | 2.483779  |
| 33 | 1 | 0.788565  | 1.332405  | 2.897884  |
| 34 | 1 | 1.695465  | 2.795105  | 2.567008  |
| 35 | 1 | 0.022719  | 3.448004  | 0.825177  |
| 36 | 1 | -0.650286 | 3.307037  | 2.447590  |
| 37 | 1 | -1.201404 | 0.838709  | 2.926873  |
| 38 | 1 | -2.674626 | 1.742392  | 2.639903  |
| 39 | 1 | -3.391588 | 0.050771  | 0.941301  |
| 40 | 1 | -3.197904 | -0.600135 | 2.567792  |
| 41 | 1 | -1.733696 | -2.885693 | -0.096660 |
| 42 | 1 | 2.913551  | -1.716926 | -0.163065 |
| 43 | 1 | 1.728011  | 2.877864  | -0.304826 |
| 44 | 1 | -2.871447 | 1.727931  | -0.221686 |
| 45 | 8 | -0.304017 | -0.441112 | -3.177978 |
| 46 | 1 | -0.010332 | -1.352214 | -2.954315 |
| 47 | 1 | -1.262857 | -0.453539 | -2.963093 |
| 48 | 6 | 3.635592  | 2.995710  | 0.692698  |
| 49 | 1 | 4.419098  | 2.347522  | 1.096291  |
| 50 | 1 | 4.080602  | 3.597557  | -0.101517 |
| 51 | 1 | 3.296384  | 3.669023  | 1.485536  |
| 52 | 6 | -2.955336 | 3.651512  | 0.747419  |
| 53 | 1 | -2.294346 | 4.445831  | 1.106326  |
| 54 | 1 | -3.594785 | 4.078368  | -0.027130 |
| 55 | 1 | -3.590571 | 3.324328  | 1.575748  |
| 56 | 6 | -3.621660 | -2.922629 | 0.940181  |
| 57 | 1 | -4.401313 | -2.245682 | 1.301363  |
| 58 | 1 | -4.074502 | -3.584282 | 0.199799  |
| 59 | 1 | -3.271836 | -3.532245 | 1.778026  |
| 60 | 6 | 2.964635  | -3.605304 | 0.874312  |
| 61 | 1 | 2.291859  | -4.381032 | 1.251608  |
| 62 | 1 | 3.606383  | -4.061404 | 0.118603  |
| 63 | 1 | 3.595595  | -3.259271 | 1.697941  |
| 64 | 8 | -3.917250 | -1.893574 | -1.650077 |
| 65 | 8 | -1.804585 | 3.903570  | -1.788363 |
| 66 | 8 | 3.919088  | 1.746748  | -1.794327 |

|    |    |          |           |           |
|----|----|----------|-----------|-----------|
| 67 | 8  | 1.899317 | -3.868707 | -1.711490 |
| 68 | 62 | 0.007717 | 0.014865  | -0.565502 |

-----  
E(RTPSSh) = -1713.9543252 Hartree  
Zero-point correction = 0.560421 Hartree/particle  
Sum of electronic and thermal Energies = -1713.358334 Hartree  
Sum of electronic and thermal Enthalpies = -1713.357390 Hartree  
Sum of electronic and thermal Free Energies = -1713.458503 Hartree

**Table S24.** [Eu(DOTMA)(H<sub>2</sub>O)]<sup>-</sup> [TSAP, Δ(δδδδ)], TPSSh/LCRECP/6-31G(d,p), aqueous solution (0 Imaginary Frequencies)

| Center Number | Atomic Number | Coordinates (Angstroms) |           |           |
|---------------|---------------|-------------------------|-----------|-----------|
|               |               | X                       | Y         | Z         |
| 1             | 7             | -1.749346               | -1.154337 | 1.135006  |
| 2             | 6             | -1.035055               | -1.874909 | 2.218637  |
| 3             | 6             | 0.201087                | -2.622808 | 1.728416  |
| 4             | 7             | 1.216681                | -1.725360 | 1.112354  |
| 5             | 6             | 1.970032                | -1.003875 | 2.168986  |
| 6             | 6             | 2.701046                | 0.230416  | 1.649631  |
| 7             | 7             | 1.784183                | 1.236021  | 1.044953  |
| 8             | 6             | 1.099390                | 2.009247  | 2.110450  |
| 9             | 6             | -0.149931               | 2.733114  | 1.617829  |
| 10            | 7             | -1.174202               | 1.805537  | 1.062854  |
| 11            | 6             | -1.906155               | 1.132156  | 2.164164  |
| 12            | 6             | -2.651391               | -0.119945 | 1.712009  |
| 13            | 6             | -2.527921               | -2.086439 | 0.258448  |
| 14            | 6             | -2.977403               | -1.343254 | -1.024678 |
| 15            | 8             | -2.245843               | -0.322291 | -1.366527 |
| 16            | 6             | 2.119659                | -2.508913 | 0.209777  |
| 17            | 6             | 1.341040                | -2.958857 | -1.053079 |
| 18            | 8             | 0.290263                | -2.250112 | -1.349473 |
| 19            | 6             | 2.534574                | 2.113359  | 0.090514  |
| 20            | 6             | 2.957789                | 1.274508  | -1.145751 |
| 21            | 8             | 2.209571                | 0.248590  | -1.410218 |
| 22            | 6             | -2.092069               | 2.542110  | 0.135619  |
| 23            | 6             | -1.309016               | 2.948033  | -1.141544 |
| 24            | 8             | -0.300920               | 2.190367  | -1.444358 |
| 25            | 1             | -0.745899               | -1.138194 | 2.972833  |
| 26            | 1             | -1.697125               | -2.588211 | 2.728719  |
| 27            | 1             | -0.087180               | -3.361996 | 0.976820  |
| 28            | 1             | 0.627344                | -3.175740 | 2.577489  |
| 29            | 1             | 1.255613                | -0.709777 | 2.942440  |
| 30            | 1             | 2.698555                | -1.662616 | 2.661640  |
| 31            | 1             | 3.425074                | -0.062238 | 0.885162  |
| 32            | 1             | 3.271319                | 0.667467  | 2.481527  |
| 33            | 1             | 0.827219                | 1.307481  | 2.903175  |
| 34            | 1             | 1.774825                | 2.743986  | 2.570130  |
| 35            | 1             | 0.118077                | 3.442441  | 0.830722  |
| 36            | 1             | -0.559720               | 3.319086  | 2.452717  |
| 37            | 1             | -1.175695               | 0.867023  | 2.933004  |
| 38            | 1             | -2.622027               | 1.813358  | 2.644784  |
| 39            | 1             | -3.387292               | 0.142108  | 0.947612  |
| 40            | 1             | -3.208404               | -0.517734 | 2.572114  |
| 41            | 1             | -1.807301               | -2.831563 | -0.099867 |
| 42            | 1             | 2.856583                | -1.791513 | -0.171021 |
| 43            | 1             | 1.799938                | 2.828370  | -0.299857 |
| 44            | 1             | -2.822307               | 1.801564  | -0.212706 |
| 45            | 8             | -0.305470               | -0.420102 | -3.168989 |
| 46            | 1             | -0.044624               | -1.339876 | -2.940087 |

|    |    |           |           |           |
|----|----|-----------|-----------|-----------|
| 47 | 1  | -1.263567 | -0.397321 | -2.952064 |
| 48 | 6  | 3.716912  | 2.886489  | 0.685273  |
| 49 | 1  | 4.479531  | 2.214341  | 1.089710  |
| 50 | 1  | 4.178950  | 3.468336  | -0.114143 |
| 51 | 1  | 3.402772  | 3.574694  | 1.475733  |
| 52 | 6  | -2.840747 | 3.732492  | 0.745669  |
| 53 | 1  | -2.153053 | 4.505647  | 1.100661  |
| 54 | 1  | -3.464556 | 4.176798  | -0.031832 |
| 55 | 1  | -3.486973 | 3.431352  | 1.575479  |
| 56 | 6  | -3.701286 | -2.812586 | 0.927826  |
| 57 | 1  | -4.462726 | -2.112563 | 1.283909  |
| 58 | 1  | -4.168872 | -3.460174 | 0.184156  |
| 59 | 1  | -3.376035 | -3.432933 | 1.767764  |
| 60 | 6  | 2.860033  | -3.683851 | 0.861052  |
| 61 | 1  | 2.167703  | -4.440615 | 1.241475  |
| 62 | 1  | 3.482677  | -4.156829 | 0.099696  |
| 63 | 1  | 3.506956  | -3.358347 | 1.680768  |
| 64 | 8  | -3.945307 | -1.771035 | -1.664709 |
| 65 | 8  | -1.701154 | 3.918870  | -1.803894 |
| 66 | 8  | 3.933717  | 1.642086  | -1.814824 |
| 67 | 8  | 1.769609  | -3.908734 | -1.718958 |
| 68 | 63 | 0.009837  | 0.015256  | -0.552773 |

E(RTPSSh) = -1714.5519019 Hartree

Zero-point correction = 0.561011 Hartree/particle

Sum of electronic and thermal Energies = -1713.955534 Hartree

Sum of electronic and thermal Enthalpies = -1713.954590 Hartree

Sum of electronic and thermal Free Energies = -1714.054459 Hartree

**Table S25.** [Gd(DOTMA)(H<sub>2</sub>O)]<sup>-</sup> [TSAP, Δ(δδδδ)], TPSSh/LCRECP/6-31G(d,p), aqueous solution (0 Imaginary Frequencies)

| Center Number | Atomic Number | Coordinates (Angstroms) |           |           |
|---------------|---------------|-------------------------|-----------|-----------|
|               |               | X                       | Y         | Z         |
| 1             | 7             | -1.438246               | -1.523052 | 1.136097  |
| 2             | 6             | -0.580698               | -2.063353 | 2.220228  |
| 3             | 6             | 0.794155                | -2.510273 | 1.731851  |
| 4             | 7             | 1.576212                | -1.405143 | 1.114999  |
| 5             | 6             | 2.146940                | -0.531847 | 2.171008  |
| 6             | 6             | 2.577352                | 0.836941  | 1.651743  |
| 7             | 7             | 1.455061                | 1.607016  | 1.050048  |
| 8             | 6             | 0.612866                | 2.204701  | 2.114624  |
| 9             | 6             | -0.769510               | 2.623679  | 1.622319  |
| 10            | 7             | -1.556110               | 1.488002  | 1.068210  |
| 11            | 6             | -2.114815               | 0.664777  | 2.168260  |
| 12            | 6             | -2.553017               | -0.724774 | 1.714525  |
| 13            | 6             | -1.977062               | -2.603424 | 0.252155  |
| 14            | 6             | -2.574906               | -1.976907 | -1.032534 |
| 15            | 8             | -2.099943               | -0.810452 | -1.362594 |
| 16            | 6             | 2.630913                | -1.957487 | 0.207455  |
| 17            | 6             | 1.970826                | -2.561800 | -1.057761 |
| 18            | 8             | 0.783964                | -2.110761 | -1.343783 |
| 19            | 6             | 1.983113                | 2.631152  | 0.092644  |
| 20            | 6             | 2.569585                | 1.907821  | -1.150000 |
| 21            | 8             | 2.082030                | 0.731850  | -1.395768 |
| 22            | 6             | -2.616893               | 1.995605  | 0.140856  |
| 23            | 6             | -1.944967               | 2.554715  | -1.141623 |
| 24            | 8             | -0.785505               | 2.051606  | -1.430245 |
| 25            | 1             | -0.467835               | -1.278638 | 2.972937  |
| 26            | 1             | -1.064458               | -2.907872 | 2.730588  |

|    |    |           |           |           |
|----|----|-----------|-----------|-----------|
| 27 | 1  | 0.684807  | -3.297848 | 0.981776  |
| 28 | 1  | 1.335152  | -2.948892 | 2.582406  |
| 29 | 1  | 1.384324  | -0.409172 | 2.944644  |
| 30 | 1  | 3.006579  | -1.007928 | 2.663197  |
| 31 | 1  | 3.346257  | 0.717625  | 0.884229  |
| 32 | 1  | 3.035377  | 1.392602  | 2.482317  |
| 33 | 1  | 0.511673  | 1.461766  | 2.910320  |
| 34 | 1  | 1.101967  | 3.076090  | 2.572138  |
| 35 | 1  | -0.670598 | 3.374075  | 0.833554  |
| 36 | 1  | -1.302087 | 3.102007  | 2.456637  |
| 37 | 1  | -1.343348 | 0.574876  | 2.937675  |
| 38 | 1  | -2.968491 | 1.162596  | 2.649111  |
| 39 | 1  | -3.330946 | -0.638730 | 0.951304  |
| 40 | 1  | -3.002677 | -1.241035 | 2.574634  |
| 41 | 1  | -1.102525 | -3.162619 | -0.100780 |
| 42 | 1  | 3.184626  | -1.088507 | -0.166451 |
| 43 | 1  | 1.103785  | 3.165769  | -0.286494 |
| 44 | 1  | -3.165849 | 1.108721  | -0.197260 |
| 45 | 8  | -0.183992 | -0.448430 | -3.160994 |
| 46 | 1  | 0.273628  | -1.288412 | -2.934810 |
| 47 | 1  | -1.123728 | -0.642358 | -2.951480 |
| 48 | 64 | 0.005629  | 0.017452  | -0.537450 |
| 49 | 6  | 2.969293  | 3.648007  | 0.678646  |
| 50 | 1  | 3.869806  | 3.164264  | 1.068483  |
| 51 | 1  | 3.276630  | 4.322470  | -0.122517 |
| 52 | 1  | 2.518337  | 4.243792  | 1.477714  |
| 53 | 6  | -3.611524 | 2.994154  | 0.743882  |
| 54 | 1  | -3.115579 | 3.906934  | 1.086929  |
| 55 | 1  | -4.321746 | 3.276874  | -0.035061 |
| 56 | 1  | -4.169981 | 2.563859  | 1.580543  |
| 57 | 6  | -2.956911 | -3.584094 | 0.908715  |
| 58 | 1  | -3.862799 | -3.081993 | 1.261033  |
| 59 | 1  | -3.255607 | -4.317468 | 0.157789  |
| 60 | 1  | -2.503087 | -4.117413 | 1.749154  |
| 61 | 6  | 3.622801  | -2.937091 | 0.847572  |
| 62 | 1  | 3.125362  | -3.836616 | 1.222172  |
| 63 | 1  | 4.334223  | -3.246952 | 0.080196  |
| 64 | 1  | 4.180287  | -2.477857 | 1.669197  |
| 65 | 8  | -3.411168 | -2.614723 | -1.683876 |
| 66 | 8  | -2.551558 | 3.395289  | -1.820905 |
| 67 | 8  | 3.416228  | 2.491992  | -1.840697 |
| 68 | 8  | 2.601769  | -3.382838 | -1.733870 |

E(RTPSSh) = -1715.1427197 Hartree

Zero-point correction = 0.561633 Hartree/particle

Sum of electronic and thermal Energies = -1714.545835 Hartree

Sum of electronic and thermal Enthalpies = -1714.544891 Hartree

Sum of electronic and thermal Free Energies = -1714.644311 Hartree

**Table S26.** [Tb(DOTMA)(H<sub>2</sub>O)]<sup>-</sup> [TSAP, Δ(δδδδ)], TPSSh/LCRECP/6-31G(d,p), aqueous solution (0 Imaginary Frequencies)

| Center Number | Atomic Number | Coordinates (Angstroms) |           |          |
|---------------|---------------|-------------------------|-----------|----------|
|               |               | X                       | Y         | Z        |
| 1             | 7             | -1.361218               | -1.586820 | 1.136151 |
| 2             | 6             | -0.484508               | -2.093792 | 2.221305 |
| 3             | 6             | 0.910044                | -2.471343 | 1.732446 |
| 4             | 7             | 1.635212                | -1.326966 | 1.117275 |
| 5             | 6             | 2.168522                | -0.432224 | 2.174607 |
| 6             | 6             | 2.530760                | 0.955655  | 1.656149 |

|    |    |           |           |           |
|----|----|-----------|-----------|-----------|
| 7  | 7  | 1.371165  | 1.667874  | 1.052924  |
| 8  | 6  | 0.505472  | 2.230473  | 2.117449  |
| 9  | 6  | -0.895156 | 2.579881  | 1.625241  |
| 10 | 7  | -1.621795 | 1.405013  | 1.070372  |
| 11 | 6  | -2.148253 | 0.560344  | 2.170070  |
| 12 | 6  | -2.516427 | -0.847763 | 1.714163  |
| 13 | 6  | -1.846516 | -2.687785 | 0.245469  |
| 14 | 6  | -2.473443 | -2.081615 | -1.034446 |
| 15 | 8  | -2.047392 | -0.894742 | -1.358957 |
| 16 | 6  | 2.713085  | -1.827328 | 0.206278  |
| 17 | 6  | 2.077764  | -2.459740 | -1.057222 |
| 18 | 8  | 0.872165  | -2.057951 | -1.340804 |
| 19 | 6  | 1.851594  | 2.713332  | 0.092780  |
| 20 | 6  | 2.476507  | 2.011531  | -1.142842 |
| 21 | 8  | 2.036593  | 0.816394  | -1.387849 |
| 22 | 6  | -2.702705 | 1.861607  | 0.138720  |
| 23 | 6  | -2.051148 | 2.455490  | -1.137759 |
| 24 | 8  | -0.870092 | 2.002678  | -1.423132 |
| 25 | 1  | -0.410909 | -1.310154 | 2.980210  |
| 26 | 1  | -0.930252 | -2.963558 | 2.723701  |
| 27 | 1  | 0.838560  | -3.261453 | 0.980519  |
| 28 | 1  | 1.473971  | -2.884882 | 2.580560  |
| 29 | 1  | 1.404138  | -0.347477 | 2.951795  |
| 30 | 1  | 3.051493  | -0.868909 | 2.661953  |
| 31 | 1  | 3.305764  | 0.874438  | 0.889789  |
| 32 | 1  | 2.959416  | 1.534800  | 2.486216  |
| 33 | 1  | 0.440378  | 1.486891  | 2.916436  |
| 34 | 1  | 0.954442  | 3.125574  | 2.570204  |
| 35 | 1  | -0.833165 | 3.334464  | 0.836715  |
| 36 | 1  | -1.452852 | 3.030607  | 2.458417  |
| 37 | 1  | -1.378433 | 0.507538  | 2.944731  |
| 38 | 1  | -3.027090 | 1.019052  | 2.644316  |
| 39 | 1  | -3.295922 | -0.798263 | 0.949375  |
| 40 | 1  | -2.941604 | -1.388979 | 2.571260  |
| 41 | 1  | -0.945902 | -3.202358 | -0.109982 |
| 42 | 1  | 3.224837  | -0.932860 | -0.167540 |
| 43 | 1  | 0.948763  | 3.203423  | -0.291518 |
| 44 | 1  | -3.206615 | 0.949912  | -0.203842 |
| 45 | 8  | -0.154321 | -0.429207 | -3.144265 |
| 46 | 1  | 0.335956  | -1.251027 | -2.919767 |
| 47 | 1  | -1.086267 | -0.664166 | -2.943496 |
| 48 | 65 | 0.004773  | 0.018586  | -0.534929 |
| 49 | 6  | 2.787040  | 3.777209  | 0.677806  |
| 50 | 1  | 3.705342  | 3.336677  | 1.077208  |
| 51 | 1  | 3.069917  | 4.458566  | -0.126530 |
| 52 | 1  | 2.305007  | 4.358699  | 1.469289  |
| 53 | 6  | -3.745404 | 2.811061  | 0.739238  |
| 54 | 1  | -3.293927 | 3.745532  | 1.085164  |
| 55 | 1  | -4.465105 | 3.061582  | -0.042010 |
| 56 | 1  | -4.286803 | 2.354423  | 1.573128  |
| 57 | 6  | -2.780135 | -3.716667 | 0.894922  |
| 58 | 1  | -3.710181 | -3.259689 | 1.245602  |
| 59 | 1  | -3.041224 | -4.460319 | 0.140069  |
| 60 | 1  | -2.304813 | -4.231709 | 1.734813  |
| 61 | 6  | 3.749636  | -2.762260 | 0.841880  |
| 62 | 1  | 3.294466  | -3.685390 | 1.212700  |
| 63 | 1  | 4.474156  | -3.035886 | 0.072969  |
| 64 | 1  | 4.286448  | -2.281781 | 1.665134  |
| 65 | 8  | -3.284531 | -2.749030 | -1.687248 |
| 66 | 8  | -2.687610 | 3.275736  | -1.813908 |
| 67 | 8  | 3.308126  | 2.624191  | -1.826994 |
| 68 | 8  | 2.740043  | -3.254507 | -1.734565 |

-----  
 E(RTPSSh) = -1715.7308748 Hartree  
 Zero-point correction = 0.561381 Hartree/particle  
 Sum of electronic and thermal Energies = -1715.134223 Hartree  
 Sum of electronic and thermal Enthalpies = -1715.133279 Hartree  
 Sum of electronic and thermal Free Energies = -1715.232692 Hartree

**Table S27.** [Dy(DOTMA)(H<sub>2</sub>O)]<sup>-</sup> [TSAP, Δ(δδδδ)], TPSSh/LCRECP/6-31G(d,p), aqueous solution (0 Imaginary Frequencies)

| Center<br>Number | Atomic<br>Number | Coordinates (Angstroms) |           |           |
|------------------|------------------|-------------------------|-----------|-----------|
|                  |                  | X                       | Y         | Z         |
| 1                | 7                | -1.338908               | -1.602055 | 1.136612  |
| 2                | 6                | -0.458725               | -2.101230 | 2.222242  |
| 3                | 6                | 0.940048                | -2.460045 | 1.732829  |
| 4                | 7                | 1.648180                | -1.304681 | 1.118397  |
| 5                | 6                | 2.172765                | -0.406445 | 2.176761  |
| 6                | 6                | 2.516969                | 0.985433  | 1.658256  |
| 7                | 7                | 1.347094                | 1.680698  | 1.055060  |
| 8                | 6                | 0.477001                | 2.234750  | 2.120274  |
| 9                | 6                | -0.927267               | 2.566191  | 1.627559  |
| 10               | 7                | -1.636488               | 1.381172  | 1.071778  |
| 11               | 6                | -2.155270               | 0.531865  | 2.171410  |
| 12               | 6                | -2.504979               | -0.880023 | 1.714273  |
| 13               | 6                | -1.808999               | -2.706486 | 0.242341  |
| 14               | 6                | -2.436419               | -2.102672 | -1.037664 |
| 15               | 8                | -2.026442               | -0.907048 | -1.351170 |
| 16               | 6                | 2.729929                | -1.790029 | 0.204125  |
| 17               | 6                | 2.097043                | -2.423696 | -1.059223 |
| 18               | 8                | 0.884017                | -2.037053 | -1.332904 |
| 19               | 6                | 1.813852                | 2.729764  | 0.092195  |
| 20               | 6                | 2.441916                | 2.030020  | -1.142323 |
| 21               | 8                | 2.014712                | 0.828678  | -1.379332 |
| 22               | 6                | -2.720461               | 1.823964  | 0.136993  |
| 23               | 6                | -2.069952               | 2.421212  | -1.137815 |
| 24               | 8                | -0.882399               | 1.980519  | -1.415213 |
| 25               | 1                | -0.395164               | -1.318666 | 2.983176  |
| 26               | 1                | -0.894996               | -2.977544 | 2.721603  |
| 27               | 1                | 0.878486                | -3.249977 | 0.979886  |
| 28               | 1                | 1.510839                | -2.866711 | 2.579607  |
| 29               | 1                | 1.408490                | -0.331354 | 2.955056  |
| 30               | 1                | 3.061539                | -0.833750 | 2.661900  |
| 31               | 1                | 3.292699                | 0.914066  | 0.891665  |
| 32               | 1                | 2.937821                | 1.571330  | 2.487502  |
| 33               | 1                | 0.420966                | 1.491310  | 2.920060  |
| 34               | 1                | 0.916234                | 3.135584  | 2.571202  |
| 35               | 1                | -0.874446               | 3.321618  | 0.839190  |
| 36               | 1                | -1.492336               | 3.008997  | 2.459939  |
| 37               | 1                | -1.386402               | 0.488323  | 2.947583  |
| 38               | 1                | -3.040431               | 0.980765  | 2.643294  |
| 39               | 1                | -3.283952               | -0.839647 | 0.948477  |
| 40               | 1                | -2.923745               | -1.428462 | 2.569875  |
| 41               | 1                | -0.902046               | -3.210951 | -0.111277 |
| 42               | 1                | 3.231476                | -0.889227 | -0.168141 |
| 43               | 1                | 0.905350                | 3.209792  | -0.291211 |
| 44               | 1                | -3.213791               | 0.906517  | -0.205442 |
| 45               | 8                | -0.146493               | -0.416752 | -3.135998 |
| 46               | 1                | 0.349555                | -1.233699 | -2.906560 |
| 47               | 1                | -1.076054               | -0.657088 | -2.930754 |
| 48               | 6                | 2.740287                | 3.803819  | 0.672732  |

|    |    |           |           |           |
|----|----|-----------|-----------|-----------|
| 49 | 1  | 3.663475  | 3.373158  | 1.071596  |
| 50 | 1  | 3.015103  | 4.485850  | -0.133855 |
| 51 | 1  | 2.254194  | 4.382670  | 1.463683  |
| 52 | 6  | -3.773998 | 2.764060  | 0.733022  |
| 53 | 1  | -3.332861 | 3.703746  | 1.078112  |
| 54 | 1  | -4.494456 | 3.005688  | -0.050357 |
| 55 | 1  | -4.312673 | 2.303683  | 1.566642  |
| 56 | 6  | -2.734753 | -3.746054 | 0.885876  |
| 57 | 1  | -3.670475 | -3.299209 | 1.234465  |
| 58 | 1  | -2.985665 | -4.490358 | 0.128190  |
| 59 | 1  | -2.257344 | -4.258464 | 1.726207  |
| 60 | 6  | 3.777138  | -2.716591 | 0.834307  |
| 61 | 1  | 3.331969  | -3.644898 | 1.204316  |
| 62 | 1  | 4.501925  | -2.981299 | 0.062497  |
| 63 | 1  | 4.311784  | -2.232973 | 1.657152  |
| 64 | 8  | -3.232512 | -2.777806 | -1.700774 |
| 65 | 8  | -2.711029 | 3.233187  | -1.819541 |
| 66 | 8  | 3.263515  | 2.648477  | -1.833238 |
| 67 | 8  | 2.765585  | -3.205558 | -1.745240 |
| 68 | 66 | 0.004203  | 0.019019  | -0.524394 |

E(RTPSSh) = -1716.3170192 Hartree

Zero-point correction = 0.561261 Hartree/particle

Sum of electronic and thermal Energies = -1715.720433 Hartree

Sum of electronic and thermal Enthalpies = -1715.719489 Hartree

Sum of electronic and thermal Free Energies = -1715.819036 Hartree

**Table S28.** [Ho(DOTMA)(H<sub>2</sub>O)]<sup>+</sup> [TSAP, Δ(δδδδ)], TPSSh/LCRECP/6-31G(d,p), aqueous solution (0 Imaginary Frequencies)

| Center Number | Atomic Number | Coordinates (Angstroms) |           |           |
|---------------|---------------|-------------------------|-----------|-----------|
|               |               | X                       | Y         | Z         |
| 1             | 7             | -1.318696               | -1.615109 | 1.135821  |
| 2             | 6             | -0.435704               | -2.106650 | 2.221913  |
| 3             | 6             | 0.966111                | -2.449715 | 1.732095  |
| 4             | 7             | 1.659184                | -1.284856 | 1.118297  |
| 5             | 6             | 2.174800                | -0.384256 | 2.178439  |
| 6             | 6             | 2.504129                | 1.010536  | 1.660051  |
| 7             | 7             | 1.325660                | 1.691078  | 1.056469  |
| 8             | 6             | 0.452582                | 2.237119  | 2.123266  |
| 9             | 6             | -0.954441               | 2.553044  | 1.630188  |
| 10            | 7             | -1.648112               | 1.359314  | 1.073261  |
| 11            | 6             | -2.158281               | 0.505940  | 2.173435  |
| 12            | 6             | -2.493483               | -0.908221 | 1.714519  |
| 13            | 6             | -1.776854               | -2.722285 | 0.238940  |
| 14            | 6             | -2.405623               | -2.119181 | -1.039964 |
| 15            | 8             | -2.007148               | -0.917457 | -1.344966 |
| 16            | 6             | 2.744467                | -1.757978 | 0.202121  |
| 17            | 6             | 2.112993                | -2.393309 | -1.060344 |
| 18            | 8             | 0.895620                | -2.015869 | -1.328104 |
| 19            | 6             | 1.781807                | 2.743278  | 0.092102  |
| 20            | 6             | 2.411909                | 2.045206  | -1.141823 |
| 21            | 8             | 1.993778                | 0.839570  | -1.373269 |
| 22            | 6             | -2.735266               | 1.790999  | 0.137115  |
| 23            | 6             | -2.086056               | 2.391538  | -1.136239 |
| 24            | 8             | -0.893758               | 1.960363  | -1.408094 |
| 25            | 1             | -0.380325               | -1.324498 | 2.983850  |
| 26            | 1             | -0.863732               | -2.988039 | 2.719558  |
| 27            | 1             | 0.912788                | -3.239627 | 0.978592  |
| 28            | 1             | 1.542833                | -2.850245 | 2.577705  |



|    |    |           |           |           |
|----|----|-----------|-----------|-----------|
| 29 | 1  | 1.409682  | -0.317227 | 2.956555  |
| 30 | 1  | 3.067819  | -0.803549 | 2.662804  |
| 31 | 1  | 3.280934  | 0.947322  | 0.893881  |
| 32 | 1  | 2.917726  | 1.602167  | 2.488774  |
| 33 | 1  | 0.404569  | 1.493294  | 2.923094  |
| 34 | 1  | 0.883677  | 3.142583  | 2.572778  |
| 35 | 1  | -0.909384 | 3.309326  | 0.842240  |
| 36 | 1  | -1.526027 | 2.988502  | 2.461893  |
| 37 | 1  | -1.388762 | 0.469501  | 2.949204  |
| 38 | 1  | -3.047754 | 0.946484  | 2.645196  |
| 39 | 1  | -3.272654 | -0.874505 | 0.948709  |
| 40 | 1  | -2.906020 | -1.463550 | 2.568627  |
| 41 | 1  | -0.865288 | -3.218739 | -0.114180 |
| 42 | 1  | 3.238046  | -0.852403 | -0.169228 |
| 43 | 1  | 0.869313  | 3.216431  | -0.290062 |
| 44 | 1  | -3.220718 | 0.869393  | -0.205191 |
| 45 | 8  | -0.139669 | -0.401692 | -3.128041 |
| 46 | 1  | 0.361066  | -1.215665 | -2.898938 |
| 47 | 1  | -1.067392 | -0.648076 | -2.922611 |
| 48 | 67 | 0.003629  | 0.019551  | -0.516276 |
| 49 | 6  | 2.702245  | 3.824140  | 0.669379  |
| 50 | 1  | 3.629321  | 3.400462  | 1.066642  |
| 51 | 1  | 2.970545  | 4.507024  | -0.138702 |
| 52 | 1  | 2.214076  | 4.400656  | 1.460802  |
| 53 | 6  | -3.796623 | 2.723778  | 0.730533  |
| 54 | 1  | -3.363731 | 3.668407  | 1.072459  |
| 55 | 1  | -4.519637 | 2.956635  | -0.053188 |
| 56 | 1  | -4.330890 | 2.261403  | 1.565913  |
| 57 | 6  | -2.696501 | -3.769495 | 0.878613  |
| 58 | 1  | -3.636206 | -3.329802 | 1.225491  |
| 59 | 1  | -2.940209 | -4.514771 | 0.119504  |
| 60 | 1  | -2.217494 | -4.279293 | 1.719621  |
| 61 | 6  | 3.799166  | -2.678181 | 0.828890  |
| 62 | 1  | 3.361376  | -3.610944 | 1.196403  |
| 63 | 1  | 4.525757  | -2.935062 | 0.056109  |
| 64 | 1  | 4.330344  | -2.192913 | 1.653020  |
| 65 | 8  | -3.192747 | -2.798438 | -1.709514 |
| 66 | 8  | -2.731182 | 3.196872  | -1.822019 |
| 67 | 8  | 3.227623  | 2.667138  | -1.836577 |
| 68 | 8  | 2.784816  | -3.168165 | -1.751058 |

E(RTPSSh) = -1716.9009134 Hartree

Zero-point correction = 0.561363 Hartree/particle

Sum of electronic and thermal Energies = -1716.304245 Hartree

Sum of electronic and thermal Enthalpies = -1716.303301 Hartree

Sum of electronic and thermal Free Energies = -1716.402755 Hartree

**Table S29.** [Er(DOTMA)(H<sub>2</sub>O)]<sup>-</sup> [TSAP, Δ(δδδδ)], TPSSh/LCRECP/6-31G(d,p), aqueous solution (0 Imaginary Frequencies)

| Center Number | Atomic Number | Coordinates (Angstroms) |           |          |
|---------------|---------------|-------------------------|-----------|----------|
|               |               | X                       | Y         | Z        |
| 1             | 7             | -1.315479               | -1.614070 | 1.136947 |
| 2             | 6             | -0.434131               | -2.108161 | 2.222816 |
| 3             | 6             | 0.967398                | -2.449556 | 1.732032 |
| 4             | 7             | 1.657484                | -1.282838 | 1.118826 |
| 5             | 6             | 2.175545                | -0.385002 | 2.179684 |
| 6             | 6             | 2.503190                | 1.010004  | 1.661813 |
| 7             | 7             | 1.322812                | 1.687619  | 1.059115 |
| 8             | 6             | 0.451794                | 2.234635  | 2.126630 |

|    |    |           |           |           |
|----|----|-----------|-----------|-----------|
| 9  | 6  | -0.954853 | 2.550251  | 1.633308  |
| 10 | 7  | -1.645728 | 1.355559  | 1.075502  |
| 11 | 6  | -2.157864 | 0.503595  | 2.175474  |
| 12 | 6  | -2.491722 | -0.910324 | 1.716014  |
| 13 | 6  | -1.771906 | -2.719100 | 0.236831  |
| 14 | 6  | -2.397430 | -2.110078 | -1.040185 |
| 15 | 8  | -1.997936 | -0.906430 | -1.336706 |
| 16 | 6  | 2.740281  | -1.753719 | 0.198698  |
| 17 | 6  | 2.102303  | -2.385429 | -1.061747 |
| 18 | 8  | 0.884042  | -2.005089 | -1.321782 |
| 19 | 6  | 1.776452  | 2.738406  | 0.092169  |
| 20 | 6  | 2.403242  | 2.035833  | -1.140228 |
| 21 | 8  | 1.982499  | 0.830011  | -1.366010 |
| 22 | 6  | -2.730702 | 1.786103  | 0.136475  |
| 23 | 6  | -2.075887 | 2.383083  | -1.135204 |
| 24 | 8  | -0.882871 | 1.949679  | -1.400855 |
| 25 | 1  | -0.379250 | -1.327816 | 2.986635  |
| 26 | 1  | -0.862715 | -2.990680 | 2.718043  |
| 27 | 1  | 0.914168  | -3.238728 | 0.977714  |
| 28 | 1  | 1.545769  | -2.850140 | 2.576451  |
| 29 | 1  | 1.412030  | -0.319051 | 2.959487  |
| 30 | 1  | 3.069464  | -0.805415 | 2.661503  |
| 31 | 1  | 3.279422  | 0.947802  | 0.894958  |
| 32 | 1  | 2.916417  | 1.602667  | 2.489940  |
| 33 | 1  | 0.404044  | 1.491407  | 2.927069  |
| 34 | 1  | 0.883780  | 3.140181  | 2.575198  |
| 35 | 1  | -0.909800 | 3.306856  | 0.845639  |
| 36 | 1  | -1.527946 | 2.984692  | 2.464469  |
| 37 | 1  | -1.389596 | 0.467485  | 2.952540  |
| 38 | 1  | -3.048023 | 0.944691  | 2.645451  |
| 39 | 1  | -3.270727 | -0.876859 | 0.950014  |
| 40 | 1  | -2.903569 | -1.467219 | 2.569404  |
| 41 | 1  | -0.859917 | -3.214445 | -0.116331 |
| 42 | 1  | 3.232355  | -0.847514 | -0.172735 |
| 43 | 1  | 0.863172  | 3.210010  | -0.289634 |
| 44 | 1  | -3.215425 | 0.864282  | -0.205862 |
| 45 | 8  | -0.140150 | -0.387644 | -3.121958 |
| 46 | 1  | 0.357548  | -1.203067 | -2.892717 |
| 47 | 1  | -1.068139 | -0.629972 | -2.913545 |
| 48 | 6  | 2.697861  | 3.820587  | 0.665080  |
| 49 | 1  | 3.624992  | 3.397946  | 1.063348  |
| 50 | 1  | 2.966041  | 4.500598  | -0.145518 |
| 51 | 1  | 2.210250  | 4.399990  | 1.454701  |
| 52 | 6  | -3.792731 | 2.720755  | 0.725452  |
| 53 | 1  | -3.359890 | 3.664859  | 1.068960  |
| 54 | 1  | -4.512380 | 2.954519  | -0.061147 |
| 55 | 1  | -4.330851 | 2.259177  | 1.558799  |
| 56 | 6  | -2.693030 | -3.767969 | 0.871349  |
| 57 | 1  | -3.632456 | -3.329134 | 1.220113  |
| 58 | 1  | -2.937215 | -4.509337 | 0.108517  |
| 59 | 1  | -2.214730 | -4.282361 | 1.709984  |
| 60 | 6  | 3.797035  | -2.675325 | 0.819546  |
| 61 | 1  | 3.360581  | -3.608014 | 1.188850  |
| 62 | 1  | 4.519392  | -2.932334 | 0.042784  |
| 63 | 1  | 4.332836  | -2.190798 | 1.641117  |
| 64 | 8  | -3.182920 | -2.784731 | -1.716124 |
| 65 | 8  | -2.716297 | 3.188234  | -1.825534 |
| 66 | 8  | 3.218783  | 2.653267  | -1.839121 |
| 67 | 8  | 2.768375  | -3.160194 | -1.757992 |
| 68 | 68 | 0.003522  | 0.019610  | -0.508740 |

-----  
E(RTPSSh) = -1717.4839164 Hartree

Zero-point correction = 0.561501 Hartree/particle  
Sum of electronic and thermal Energies = -1716.887141 Hartree  
Sum of electronic and thermal Enthalpies = -1716.886196 Hartree  
Sum of electronic and thermal Free Energies = -1716.985548 Hartree

**Table S30.** [Tm(DOTMA)(H<sub>2</sub>O)]<sup>-</sup> [TSAP, Δ(δδδδ)], TPSSh/LCRECP/6-31G(d,p), aqueous solution (0 Imaginary Frequencies)

| Center Number | Atomic Number | Coordinates (Angstroms) |           |           |
|---------------|---------------|-------------------------|-----------|-----------|
|               |               | X                       | Y         | Z         |
| 1             | 7             | -1.435419               | -1.506241 | 1.139962  |
| 2             | 6             | -0.595459               | -2.067634 | 2.226046  |
| 3             | 6             | 0.775564                | -2.515930 | 1.735651  |
| 4             | 7             | 1.552001                | -1.405990 | 1.122076  |
| 5             | 6             | 2.139874                | -0.551257 | 2.181882  |
| 6             | 6             | 2.573263                | 0.814369  | 1.663637  |
| 7             | 7             | 1.447971                | 1.579352  | 1.062145  |
| 8             | 6             | 0.622942                | 2.192939  | 2.129444  |
| 9             | 6             | -0.755806               | 2.614623  | 1.637581  |
| 10            | 7             | -1.533875               | 1.476051  | 1.079965  |
| 11            | 6             | -2.112535               | 0.666858  | 2.179170  |
| 12            | 6             | -2.554443               | -0.716357 | 1.719078  |
| 13            | 6             | -1.973037               | -2.571801 | 0.237902  |
| 14            | 6             | -2.545527               | -1.913223 | -1.038521 |
| 15            | 8             | -2.051837               | -0.743491 | -1.329281 |
| 16            | 6             | 2.593514                | -1.957349 | 0.199687  |
| 17            | 6             | 1.906086                | -2.531355 | -1.061875 |
| 18            | 8             | 0.718895                | -2.058531 | -1.314645 |
| 19            | 6             | 1.979126                | 2.592007  | 0.094473  |
| 20            | 6             | 2.544626                | 1.842782  | -1.139295 |
| 21            | 8             | 2.027661                | 0.674426  | -1.362659 |
| 22            | 6             | -2.581776               | 1.986297  | 0.139325  |
| 23            | 6             | -1.883342               | 2.524866  | -1.134213 |
| 24            | 8             | -0.729111               | 1.996949  | -1.398405 |
| 25            | 1             | -0.480186               | -1.292079 | 2.988392  |
| 26            | 1             | -1.091475               | -2.913662 | 2.722059  |
| 27            | 1             | 0.662298                | -3.298987 | 0.981484  |
| 28            | 1             | 1.321265                | -2.959318 | 2.580439  |
| 29            | 1             | 1.383688                | -0.427235 | 2.962036  |
| 30            | 1             | 2.999312                | -1.039286 | 2.662760  |
| 31            | 1             | 3.341677                | 0.693107  | 0.895872  |
| 32            | 1             | 3.031565                | 1.373397  | 2.491451  |
| 33            | 1             | 0.519352                | 1.455817  | 2.930375  |
| 34            | 1             | 1.123957                | 3.062486  | 2.577410  |
| 35            | 1             | -0.655064               | 3.366505  | 0.850368  |
| 36            | 1             | -1.293570               | 3.090951  | 2.469495  |
| 37            | 1             | -1.349218               | 0.570836  | 2.956222  |
| 38            | 1             | -2.965404               | 1.176561  | 2.648859  |
| 39            | 1             | -3.328716               | -0.623326 | 0.953073  |
| 40            | 1             | -3.007968               | -1.240219 | 2.572333  |
| 41            | 1             | -1.101116               | -3.135360 | -0.113685 |
| 42            | 1             | 3.156436                | -1.091945 | -0.168026 |
| 43            | 1             | 1.104385                | 3.133610  | -0.284569 |
| 44            | 1             | -3.137201               | 1.103948  | -0.199179 |
| 45            | 8             | -0.173298               | -0.370627 | -3.118958 |
| 46            | 1             | 0.258269                | -1.223182 | -2.891864 |
| 47            | 1             | -1.115159               | -0.537945 | -2.897366 |
| 48            | 69            | 0.007194                | 0.018833  | -0.506423 |
| 49            | 6             | 2.984283                | 3.599261  | 0.663268  |
| 50            | 1             | 3.878437                | 3.105774  | 1.055304  |

|    |   |           |           |           |
|----|---|-----------|-----------|-----------|
| 51 | 1 | 3.299311  | 4.258118  | -0.147956 |
| 52 | 1 | 2.547236  | 4.212962  | 1.456471  |
| 53 | 6 | -3.568501 | 3.003001  | 0.723888  |
| 54 | 1 | -3.064594 | 3.914032  | 1.059535  |
| 55 | 1 | -4.270834 | 3.285106  | -0.062488 |
| 56 | 1 | -4.137194 | 2.588938  | 1.561865  |
| 57 | 6 | -2.973115 | -3.548909 | 0.867396  |
| 58 | 1 | -3.877213 | -3.041237 | 1.216026  |
| 59 | 1 | -3.271641 | -4.267404 | 0.101989  |
| 60 | 1 | -2.536427 | -4.100288 | 1.705224  |
| 61 | 6 | 3.575303  | -2.961905 | 0.814987  |
| 62 | 1 | 3.067886  | -3.859892 | 1.179418  |
| 63 | 1 | 4.276039  | -3.270074 | 0.037023  |
| 64 | 1 | 4.146334  | -2.524196 | 1.639089  |
| 65 | 8 | -3.379743 | -2.521293 | -1.719043 |
| 66 | 8 | -2.458542 | 3.374673  | -1.828461 |
| 67 | 8 | 3.405761  | 2.391464  | -1.840400 |
| 68 | 8 | 2.508733  | -3.350557 | -1.764694 |

E(RTPSSh) = -1718.0634798 Hartree

Zero-point correction = 0.562082 Hartree/particle

Sum of electronic and thermal Energies = -1717.466376 Hartree

Sum of electronic and thermal Enthalpies = -1717.465432 Hartree

Sum of electronic and thermal Free Energies = -1717.563984 Hartree

**Table S31.** [Yb(DOTMA)(H<sub>2</sub>O)]<sup>-</sup> [TSAP, Δ(δδδδ)], TPSSh/LCRECP/6-31G(d,p), aqueous solution (0 Imaginary Frequencies)

| Center<br>Number | Atomic<br>Number | Coordinates (Angstroms) |           |           |
|------------------|------------------|-------------------------|-----------|-----------|
|                  |                  | X                       | Y         | Z         |
| 1                | 7                | 1.991233                | -0.095141 | -1.261722 |
| 2                | 6                | 1.721010                | -1.065938 | -2.350449 |
| 3                | 6                | 1.041816                | -2.333180 | -1.842216 |
| 4                | 7                | -0.256999               | -2.054336 | -1.169276 |
| 5                | 6                | -1.321373               | -1.820671 | -2.177031 |
| 6                | 6                | -2.541882               | -1.122834 | -1.586157 |
| 7                | 7                | -2.205036               | 0.193658  | -0.978216 |
| 8                | 6                | -2.079305               | 1.231455  | -2.032126 |
| 9                | 6                | -1.332599               | 2.469700  | -1.547019 |
| 10               | 7                | 0.038717                | 2.155457  | -1.059435 |
| 11               | 6                | 0.967840                | 1.991786  | -2.206263 |
| 12               | 6                | 2.249052                | 1.259776  | -1.823180 |
| 13               | 6                | 3.134502                | -0.516754 | -0.391229 |
| 14               | 6                | 3.127904                | 0.339650  | 0.897788  |
| 15               | 8                | 1.956951                | 0.770918  | 1.276301  |
| 16               | 6                | -0.600415               | -3.167988 | -0.227608 |
| 17               | 6                | 0.315228                | -3.096307 | 1.018805  |
| 18               | 8                | 0.853576                | -1.933318 | 1.255127  |
| 19               | 6                | -3.220597               | 0.558343  | 0.062707  |
| 20               | 6                | -3.026838               | -0.353308 | 1.301685  |
| 21               | 8                | -1.837783               | -0.855450 | 1.447212  |
| 22               | 6                | 0.501526                | 3.204036  | -0.094533 |
| 23               | 6                | -0.273799               | 3.048292  | 1.239473  |
| 24               | 8                | -0.749103               | 1.863069  | 1.477446  |
| 25               | 1                | 1.082479                | -0.571233 | -3.087327 |
| 26               | 1                | 2.643122                | -1.343424 | -2.878911 |
| 27               | 1                | 1.688685                | -2.835394 | -1.117885 |
| 28               | 1                | 0.908003                | -3.022922 | -2.686737 |
| 29               | 1                | -0.892750               | -1.204738 | -2.972021 |
| 30               | 1                | -1.640964               | -2.759177 | -2.650316 |

|    |    |           |           |           |
|----|----|-----------|-----------|-----------|
| 31 | 1  | -2.984608 | -1.746937 | -0.805629 |
| 32 | 1  | -3.297938 | -1.011480 | -2.375412 |
| 33 | 1  | -1.546497 | 0.784324  | -2.876175 |
| 34 | 1  | -3.062273 | 1.536253  | -2.416498 |
| 35 | 1  | -1.879926 | 2.934723  | -0.722825 |
| 36 | 1  | -1.302020 | 3.202641  | -2.364906 |
| 37 | 1  | 0.438718  | 1.434719  | -2.984264 |
| 38 | 1  | 1.233103  | 2.961514  | -2.649467 |
| 39 | 1  | 2.791639  | 1.834118  | -1.067346 |
| 40 | 1  | 2.897798  | 1.203671  | -2.707922 |
| 41 | 1  | 2.889045  | -1.526766 | -0.043332 |
| 42 | 1  | -1.597442 | -2.933229 | 0.160372  |
| 43 | 1  | -2.942122 | 1.557616  | 0.415690  |
| 44 | 1  | 1.534188  | 2.940656  | 0.160043  |
| 45 | 8  | 1.398795  | -0.626214 | 3.683040  |
| 46 | 1  | 1.221342  | -1.316548 | 3.009728  |
| 47 | 1  | 1.715227  | 0.094083  | 3.103374  |
| 48 | 6  | -4.678617 | 0.585814  | -0.408597 |
| 49 | 1  | -5.018205 | -0.398039 | -0.744914 |
| 50 | 1  | -5.303030 | 0.879875  | 0.436718  |
| 51 | 1  | -4.833820 | 1.305091  | -1.218195 |
| 52 | 6  | 0.472380  | 4.646256  | -0.612313 |
| 53 | 1  | -0.542717 | 4.973505  | -0.854813 |
| 54 | 1  | 0.850258  | 5.298563  | 0.176894  |
| 55 | 1  | 1.102453  | 4.775724  | -1.497296 |
| 56 | 6  | 4.512206  | -0.538317 | -1.061004 |
| 57 | 1  | 4.812804  | 0.454265  | -1.408767 |
| 58 | 1  | 5.245709  | -0.865465 | -0.321969 |
| 59 | 1  | 4.544849  | -1.230584 | -1.907478 |
| 60 | 6  | -0.624374 | -4.575261 | -0.835860 |
| 61 | 1  | 0.359518  | -4.877954 | -1.205808 |
| 62 | 1  | -0.915320 | -5.278483 | -0.053584 |
| 63 | 1  | -1.345123 | -4.653767 | -1.655002 |
| 64 | 8  | 4.183596  | 0.528286  | 1.511701  |
| 65 | 8  | -0.363190 | 4.020344  | 2.000051  |
| 66 | 8  | -3.973374 | -0.518967 | 2.081394  |
| 67 | 8  | 0.454122  | -4.099005 | 1.727010  |
| 68 | 70 | -0.018290 | 0.004896  | 0.392415  |

E(RTPSSh) = -1718.6478812 Hartree

Zero-point correction = 0.561624 Hartree/particle

Sum of electronic and thermal Energies = -1718.050811 Hartree

Sum of electronic and thermal Enthalpies = -1718.049867 Hartree

Sum of electronic and thermal Free Energies = -1718.150084 Hartree

**Table S32.** [Lu(DOTMA)(H<sub>2</sub>O)]<sup>-</sup> [TSAP, Δ(δδδδ)], TPSSh/LCRECP/6-31G(d,p), aqueous solution (0 Imaginary Frequencies)

| Center Number | Atomic Number | Coordinates (Angstroms) |           |           |
|---------------|---------------|-------------------------|-----------|-----------|
|               |               | X                       | Y         | Z         |
| 1             | 7             | 1.888166                | -0.686745 | -1.237762 |
| 2             | 6             | 1.355764                | -1.540933 | -2.329287 |
| 3             | 6             | 0.326360                | -2.547089 | -1.827176 |
| 4             | 7             | -0.837318               | -1.892171 | -1.168668 |
| 5             | 6             | -1.781428               | -1.369222 | -2.187748 |
| 6             | 6             | -2.740322               | -0.332357 | -1.611837 |
| 7             | 7             | -2.028918               | 0.825078  | -1.001846 |
| 8             | 6             | -1.600305               | 1.778186  | -2.056459 |
| 9             | 6             | -0.522704               | 2.739047  | -1.567659 |
| 10            | 7             | 0.688542                | 2.030668  | -1.068427 |

|    |    |           |           |           |
|----|----|-----------|-----------|-----------|
| 11 | 6  | 1.540120  | 1.600175  | -2.205109 |
| 12 | 6  | 2.543897  | 0.525007  | -1.803343 |
| 13 | 6  | 2.846079  | -1.423677 | -0.352232 |
| 14 | 6  | 3.060557  | -0.613688 | 0.948575  |
| 15 | 8  | 2.076606  | 0.172070  | 1.288958  |
| 16 | 6  | -1.499335 | -2.847353 | -0.223111 |
| 17 | 6  | -0.616085 | -3.029068 | 1.034590  |
| 18 | 8  | 0.248810  | -2.079051 | 1.257486  |
| 19 | 6  | -2.895169 | 1.473375  | 0.036458  |
| 20 | 6  | -2.988027 | 0.538421  | 1.269529  |
| 21 | 8  | -1.992584 | -0.282641 | 1.424820  |
| 22 | 6  | 1.430758  | 2.898914  | -0.098013 |
| 23 | 6  | 0.627512  | 2.983505  | 1.224718  |
| 24 | 8  | -0.180375 | 1.991692  | 1.453525  |
| 25 | 1  | 0.899445  | -0.881172 | -3.072712 |
| 26 | 1  | 2.160246  | -2.080458 | -2.847204 |
| 27 | 1  | 0.788937  | -3.214816 | -1.095789 |
| 28 | 1  | 0.002848  | -3.170484 | -2.671837 |
| 29 | 1  | -1.189228 | -0.922004 | -2.990716 |
| 30 | 1  | -2.365430 | -2.177379 | -2.649070 |
| 31 | 1  | -3.358749 | -0.789559 | -0.835289 |
| 32 | 1  | -3.420392 | -0.001760 | -2.408605 |
| 33 | 1  | -1.222092 | 1.190637  | -2.897336 |
| 34 | 1  | -2.448982 | 2.359076  | -2.442265 |
| 35 | 1  | -0.913838 | 3.347290  | -0.748107 |
| 36 | 1  | -0.267529 | 3.427268  | -2.384847 |
| 37 | 1  | 0.879720  | 1.219724  | -2.989423 |
| 38 | 1  | 2.083758  | 2.447632  | -2.644485 |
| 39 | 1  | 3.224971  | 0.919690  | -1.044288 |
| 40 | 1  | 3.155377  | 0.269927  | -2.679558 |
| 41 | 1  | 2.315826  | -2.323493 | -0.020420 |
| 42 | 1  | -2.389653 | -2.329212 | 0.148149  |
| 43 | 1  | -2.331212 | 2.340808  | 0.397011  |
| 44 | 1  | 2.334848  | 2.341300  | 0.168735  |
| 45 | 8  | 0.933459  | -0.818332 | 3.645704  |
| 46 | 1  | 0.624162  | -1.487479 | 2.999184  |
| 47 | 1  | 1.519065  | -0.285222 | 3.071819  |
| 48 | 71 | -0.011869 | 0.011555  | 0.382104  |
| 49 | 6  | -4.274723 | 1.938705  | -0.441679 |
| 50 | 1  | -4.890960 | 1.104227  | -0.788832 |
| 51 | 1  | -4.789823 | 2.401221  | 0.402118  |
| 52 | 1  | -4.201446 | 2.677050  | -1.245769 |
| 53 | 6  | 1.835006  | 4.283541  | -0.616064 |
| 54 | 1  | 0.964387  | 4.900352  | -0.856647 |
| 55 | 1  | 2.393117  | 4.792360  | 0.171709  |
| 56 | 1  | 2.473277  | 4.218299  | -1.502171 |
| 57 | 6  | 4.173867  | -1.834503 | -0.997130 |
| 58 | 1  | 4.758490  | -0.967090 | -1.316605 |
| 59 | 1  | 4.761643  | -2.373465 | -0.252021 |
| 60 | 1  | 4.023401  | -2.491995 | -1.858186 |
| 61 | 6  | -1.923775 | -4.194284 | -0.820285 |
| 62 | 1  | -1.065757 | -4.777835 | -1.166140 |
| 63 | 1  | -2.423689 | -4.769536 | -0.039156 |
| 64 | 1  | -2.619940 | -4.068398 | -1.654423 |
| 65 | 8  | 4.094238  | -0.776640 | 1.604885  |
| 66 | 8  | 0.817410  | 3.939926  | 1.986098  |
| 67 | 8  | -3.952952 | 0.643311  | 2.036837  |
| 68 | 8  | -0.792574 | -4.010826 | 1.762971  |

-----  
E(RTPSSh) = -1719.2010682 Hartree

Zero-point correction = 0.561134 Hartree/particle

Sum of electronic and thermal Energies = -1718.604389 Hartree

Sum of electronic and thermal Enthalpies = -1718.603445 Hartree  
 Sum of electronic and thermal Free Energies = -1718.703875 Hartree

**Table S33.** [La(DOTMA-(gly)<sub>4</sub>(H<sub>2</sub>O))<sup>-</sup>] [SAP, Δ(λλλλ)], TPSSh/LCRECP/6-31G(d,p), aqueous solution (0 Imaginary Frequencies)

| Center<br>Number | Atomic<br>Number | Coordinates (Angstroms) |           |           |
|------------------|------------------|-------------------------|-----------|-----------|
|                  |                  | X                       | Y         | Z         |
| 1                | 7                | 2.080002                | -0.641511 | 1.574643  |
| 2                | 6                | 1.581235                | -1.549085 | 2.648928  |
| 3                | 6                | 0.591251                | -2.616757 | 2.187004  |
| 4                | 7                | -0.655953               | -2.059508 | 1.576956  |
| 5                | 6                | -1.548282               | -1.549096 | 2.659037  |
| 6                | 6                | -2.627190               | -0.566315 | 2.205463  |
| 7                | 7                | -2.080892               | 0.676364  | 1.576644  |
| 8                | 6                | -1.581737               | 1.587943  | 2.647469  |
| 9                | 6                | -0.592758               | 2.655619  | 2.182920  |
| 10               | 7                | 0.653336                | 2.098381  | 1.572004  |
| 11               | 6                | 1.545860                | 1.587730  | 2.652752  |
| 12               | 6                | 2.624329                | 0.605431  | 2.197977  |
| 13               | 6                | 3.153569                | -1.263475 | 0.720193  |
| 14               | 6                | 2.524055                | -2.252403 | -0.267106 |
| 15               | 8                | 1.414339                | -1.953231 | -0.814899 |
| 16               | 6                | -1.296829               | -3.127055 | 0.729188  |
| 17               | 6                | -2.297290               | -2.483907 | -0.238156 |
| 18               | 8                | -2.009138               | -1.364455 | -0.765596 |
| 19               | 6                | -3.149241               | 1.297105  | 0.715641  |
| 20               | 6                | -2.509291               | 2.275464  | -0.276975 |
| 21               | 8                | -1.393557               | 1.974783  | -0.807918 |
| 22               | 6                | 1.294052                | 3.162813  | 0.722149  |
| 23               | 6                | 2.281429                | 2.514148  | -0.255328 |
| 24               | 8                | 1.984780                | 1.394858  | -0.777814 |
| 25               | 1                | 1.112635                | -0.920649 | 3.409736  |
| 26               | 1                | 2.414287                | -2.053519 | 3.154453  |
| 27               | 1                | 1.055865                | -3.275979 | 1.451505  |
| 28               | 1                | 0.352442                | -3.235832 | 3.062521  |
| 29               | 1                | -0.907635               | -1.067592 | 3.401422  |
| 30               | 1                | -2.040146               | -2.377729 | 3.184041  |
| 31               | 1                | -3.299335               | -1.038849 | 1.487296  |
| 32               | 1                | -3.230924               | -0.320458 | 3.089839  |
| 33               | 1                | -1.112312               | 0.961967  | 3.409865  |
| 34               | 1                | -2.415132               | 2.092850  | 3.152135  |
| 35               | 1                | -1.059046               | 3.314126  | 1.447918  |
| 36               | 1                | -0.353534               | 3.275766  | 3.057819  |
| 37               | 1                | 0.906239                | 1.106349  | 3.396141  |
| 38               | 1                | 2.039243                | 2.415519  | 3.177927  |
| 39               | 1                | 3.292601                | 1.077198  | 1.475647  |
| 40               | 1                | 3.231910                | 0.363384  | 3.080678  |
| 41               | 1                | 3.485979                | -0.440941 | 0.073887  |
| 42               | 1                | -0.486469               | -3.465329 | 0.070224  |
| 43               | 1                | -3.485732               | 0.471572  | 0.075331  |
| 44               | 1                | 0.480770                | 3.508348  | 0.070851  |
| 45               | 8                | 0.076050                | -0.415575 | -2.720476 |
| 46               | 1                | 0.620737                | -1.217608 | -2.807191 |
| 47               | 1                | -0.764254               | -0.617966 | -3.161475 |
| 48               | 7                | 3.381999                | 3.165178  | -0.573212 |
| 49               | 7                | -3.163626               | 3.371381  | -0.601644 |
| 50               | 7                | -3.398926               | -3.138712 | -0.543693 |
| 51               | 7                | 3.177038                | -3.353120 | -0.573663 |
| 52               | 1                | 3.678906                | 4.080683  | -0.187919 |

|    |    |           |           |           |
|----|----|-----------|-----------|-----------|
| 53 | 1  | -4.075591 | 3.673306  | -0.210976 |
| 54 | 1  | -3.688641 | -4.056142 | -0.156786 |
| 55 | 1  | 4.084409  | -3.656300 | -0.171537 |
| 56 | 6  | 2.796293  | -4.345191 | -1.571423 |
| 57 | 1  | 2.686672  | -3.880986 | -2.556852 |
| 58 | 6  | 4.375048  | 2.770252  | -1.564114 |
| 59 | 1  | 3.910256  | 2.634821  | -2.545958 |
| 60 | 6  | -2.779205 | 4.352526  | -1.608518 |
| 61 | 1  | -1.832301 | 4.834165  | -1.343126 |
| 62 | 6  | -4.401873 | -2.748576 | -1.526562 |
| 63 | 1  | -3.945263 | -2.608800 | -2.511654 |
| 64 | 1  | 4.852356  | 1.825279  | -1.284186 |
| 65 | 1  | 1.841728  | -4.814065 | -1.311068 |
| 66 | 1  | -4.883105 | -1.807115 | -1.241579 |
| 67 | 1  | -2.652196 | 3.875427  | -2.585544 |
| 68 | 6  | -5.453564 | -3.907268 | -1.563643 |
| 69 | 8  | -5.212815 | -4.864051 | -0.762822 |
| 70 | 8  | -6.399084 | -3.759039 | -2.366624 |
| 71 | 6  | 3.942144  | -5.411536 | -1.586628 |
| 72 | 8  | 4.883295  | -5.185182 | -0.763232 |
| 73 | 8  | 3.800332  | -6.351943 | -2.396356 |
| 74 | 6  | 5.434108  | 3.921989  | -1.607458 |
| 75 | 8  | 5.205908  | 4.879444  | -0.803790 |
| 76 | 8  | 6.372946  | 3.768540  | -2.417426 |
| 77 | 6  | -3.933290 | 5.408892  | -1.653935 |
| 78 | 8  | -4.880998 | 5.190472  | -0.835974 |
| 79 | 8  | -3.791013 | 6.336281  | -2.478852 |
| 80 | 6  | 1.850802  | 4.373208  | 1.484654  |
| 81 | 1  | 2.771410  | 4.144304  | 2.028021  |
| 82 | 1  | 2.061750  | 5.182616  | 0.780297  |
| 83 | 1  | 1.114021  | 4.754860  | 2.195391  |
| 84 | 6  | -4.365692 | 1.853016  | 1.468695  |
| 85 | 1  | -5.175979 | 2.046513  | 0.760336  |
| 86 | 1  | -4.740848 | 1.121852  | 2.188711  |
| 87 | 1  | -4.147183 | 2.783035  | 2.000196  |
| 88 | 6  | -1.838288 | -4.343051 | 1.493546  |
| 89 | 1  | -2.753414 | -4.120695 | 2.048673  |
| 90 | 1  | -2.053794 | -5.150262 | 0.788082  |
| 91 | 1  | -1.091409 | -4.724617 | 2.193557  |
| 92 | 6  | 4.372175  | -1.806681 | 1.478823  |
| 93 | 1  | 4.157404  | -2.731610 | 2.020601  |
| 94 | 1  | 5.182429  | -2.004851 | 0.771777  |
| 95 | 1  | 4.745278  | -1.066521 | 2.190497  |
| 96 | 57 | -0.003425 | 0.012275  | -0.137353 |

E(RTPSSh) = -2542.8414576 Hartree

Zero-point correction = 0.780436 Hartree/particle

Sum of electronic and thermal Energies = -2542.007278 Hartree

Sum of electronic and thermal Enthalpies = -2542.006334 Hartree

Sum of electronic and thermal Free Energies = -2542.153601 Hartree

**Table S34.** [Ce(DOTMA-(gly)<sub>4</sub>(H<sub>2</sub>O)]<sup>-</sup> [SAP, Δ(λλλλ)], TPSSh/LCRECP/6-31G(d,p), aqueous solution (0 Imaginary Frequencies)

| Center Number | Atomic Number | Coordinates (Angstroms) |           |          |
|---------------|---------------|-------------------------|-----------|----------|
|               |               | X                       | Y         | Z        |
| 1             | 7             | 2.092702                | -0.576430 | 1.597003 |
| 2             | 6             | 1.618153                | -1.493096 | 2.674670 |
| 3             | 6             | 0.662110                | -2.591513 | 2.214232 |
| 4             | 7             | -0.597538               | -2.070279 | 1.597441 |



|    |   |           |           |           |
|----|---|-----------|-----------|-----------|
| 5  | 6 | -1.512774 | -1.595274 | 2.676926  |
| 6  | 6 | -2.613816 | -0.639436 | 2.220724  |
| 7  | 7 | -2.094821 | 0.615848  | 1.594011  |
| 8  | 6 | -1.622250 | 1.539234  | 2.667065  |
| 9  | 6 | -0.666495 | 2.636574  | 2.202935  |
| 10 | 7 | 0.592372  | 2.113306  | 1.587895  |
| 11 | 6 | 1.506316  | 1.641093  | 2.668701  |
| 12 | 6 | 2.608026  | 0.684632  | 2.216314  |
| 13 | 6 | 3.179568  | -1.173571 | 0.742138  |
| 14 | 6 | 2.571573  | -2.168709 | -0.251171 |
| 15 | 8 | 1.447370  | -1.897109 | -0.784439 |
| 16 | 6 | -1.199042 | -3.151687 | 0.738265  |
| 17 | 6 | -2.208102 | -2.534498 | -0.236338 |
| 18 | 8 | -1.949011 | -1.402145 | -0.754272 |
| 19 | 6 | -3.174547 | 1.210444  | 0.728880  |
| 20 | 6 | -2.552940 | 2.194531  | -0.268761 |
| 21 | 8 | -1.423885 | 1.919089  | -0.785305 |
| 22 | 6 | 1.195118  | 3.188220  | 0.723338  |
| 23 | 6 | 2.189987  | 2.559574  | -0.259244 |
| 24 | 8 | 1.922265  | 1.425102  | -0.765980 |
| 25 | 1 | 1.128065  | -0.875076 | 3.430606  |
| 26 | 1 | 2.464494  | -1.969415 | 3.185454  |
| 27 | 1 | 1.148014  | -3.240997 | 1.483967  |
| 28 | 1 | 0.436882  | -3.213101 | 3.091462  |
| 29 | 1 | -0.892843 | -1.104141 | 3.430598  |
| 30 | 1 | -1.986464 | -2.442263 | 3.189124  |
| 31 | 1 | -3.271268 | -1.127806 | 1.499661  |
| 32 | 1 | -3.226945 | -0.408853 | 3.102692  |
| 33 | 1 | -1.132691 | 0.925578  | 3.426942  |
| 34 | 1 | -2.470078 | 2.016998  | 3.174128  |
| 35 | 1 | -1.152997 | 3.284078  | 1.471417  |
| 36 | 1 | -0.441556 | 3.260931  | 3.078521  |
| 37 | 1 | 0.886246  | 1.152148  | 3.423722  |
| 38 | 1 | 1.980496  | 2.488836  | 3.179464  |
| 39 | 1 | 3.263448  | 1.170459  | 1.491597  |
| 40 | 1 | 3.222740  | 0.460306  | 3.098759  |
| 41 | 1 | 3.496347  | -0.341560 | 0.100481  |
| 42 | 1 | -0.372601 | -3.460671 | 0.085187  |
| 43 | 1 | -3.493448 | 0.374559  | 0.093499  |
| 44 | 1 | 0.366013  | 3.503977  | 0.077304  |
| 45 | 8 | 0.004945  | -0.430417 | -2.657388 |
| 46 | 1 | 0.635600  | -1.168365 | -2.737978 |
| 47 | 1 | -0.853165 | -0.796954 | -2.928734 |
| 48 | 7 | 3.264289  | 3.241333  | -0.600302 |
| 49 | 7 | -3.235041 | 3.266910  | -0.613802 |
| 50 | 7 | -3.282731 | -3.222124 | -0.562469 |
| 51 | 7 | 3.255934  | -3.243123 | -0.580557 |
| 52 | 1 | 3.539538  | 4.169169  | -0.227817 |
| 53 | 1 | -4.158614 | 3.548613  | -0.234998 |
| 54 | 1 | -3.549747 | -4.151350 | -0.185981 |
| 55 | 1 | 4.176809  | -3.523750 | -0.192230 |
| 56 | 6 | 2.898420  | -4.230733 | -1.591323 |
| 57 | 1 | 2.762525  | -3.754084 | -2.567478 |
| 58 | 6 | 4.255602  | 2.866843  | -1.600872 |
| 59 | 1 | 3.782466  | 2.710813  | -2.575661 |
| 60 | 6 | -2.869237 | 4.246061  | -1.629549 |
| 61 | 1 | -1.938375 | 4.757034  | -1.362358 |
| 62 | 6 | -4.282220 | -2.859443 | -1.559442 |
| 63 | 1 | -3.814751 | -2.699747 | -2.536405 |
| 64 | 1 | 4.763078  | 1.938044  | -1.320123 |
| 65 | 1 | 1.963392  | -4.736496 | -1.329217 |
| 66 | 1 | -4.798518 | -1.935879 | -1.277589 |

|    |    |           |           |           |
|----|----|-----------|-----------|-----------|
| 67 | 1  | -2.720962 | 3.760986  | -2.599618 |
| 68 | 6  | -5.293828 | -4.052433 | -1.618588 |
| 69 | 8  | -5.032992 | -5.004754 | -0.818610 |
| 70 | 8  | -6.231086 | -3.931711 | -2.435482 |
| 71 | 6  | 4.080032  | -5.256446 | -1.636189 |
| 72 | 8  | 5.020645  | -5.012142 | -0.817269 |
| 73 | 8  | 3.962783  | -6.186589 | -2.461427 |
| 74 | 6  | 5.280194  | 4.048291  | -1.666383 |
| 75 | 8  | 5.032868  | 5.006043  | -0.868685 |
| 76 | 8  | 6.213871  | 3.914828  | -2.485682 |
| 77 | 6  | -4.051741 | 5.269281  | -1.697133 |
| 78 | 8  | -5.000259 | 5.033725  | -0.884864 |
| 79 | 8  | -3.927905 | 6.190683  | -2.531595 |
| 80 | 6  | 1.723541  | 4.420786  | 1.470179  |
| 81 | 1  | 2.658139  | 4.225742  | 2.002844  |
| 82 | 1  | 1.899019  | 5.231511  | 0.757691  |
| 83 | 1  | 0.984036  | 4.783704  | 2.187990  |
| 84 | 6  | -4.402760 | 1.746237  | 1.477490  |
| 85 | 1  | -5.218728 | 1.911213  | 0.768487  |
| 86 | 1  | -4.759083 | 1.015118  | 2.207131  |
| 87 | 1  | -4.205946 | 2.687828  | 1.997024  |
| 88 | 6  | -1.709801 | -4.388285 | 1.490491  |
| 89 | 1  | -2.638983 | -4.199794 | 2.034702  |
| 90 | 1  | -1.888659 | -5.199127 | 0.779015  |
| 91 | 1  | -0.959326 | -4.747552 | 2.198492  |
| 92 | 6  | 4.407537  | -1.696428 | 1.500169  |
| 93 | 1  | 4.213267  | -2.633931 | 2.027934  |
| 94 | 1  | 5.226529  | -1.864116 | 0.795358  |
| 95 | 1  | 4.757969  | -0.956908 | 2.224023  |
| 96 | 58 | -0.003313 | 0.013412  | -0.088462 |

E(RTPSSh) = -2543.4937071 Hartree

Zero-point correction = 0.780811 Hartree/particle

Sum of electronic and thermal Energies = -2542.659361 Hartree

Sum of electronic and thermal Enthalpies = -2542.658417 Hartree

Sum of electronic and thermal Free Energies = -2542.804370 Hartree

**Table S35.** [Pr(DOTMA-(gly)<sub>4</sub>(H<sub>2</sub>O)]<sup>-</sup> [SAP, Δ(λλλ)], TPSSh/LCRECP/6-31G(d,p), aqueous solution (0 Imaginary Frequencies)

| Center Number | Atomic Number | Coordinates (Angstroms) |           |           |
|---------------|---------------|-------------------------|-----------|-----------|
|               |               | X                       | Y         | Z         |
| 1             | 7             | 2.103071                | -0.525558 | 1.608697  |
| 2             | 6             | 1.650112                | -1.453832 | 2.688390  |
| 3             | 6             | 0.717247                | -2.573561 | 2.229797  |
| 4             | 7             | -0.554226               | -2.082811 | 1.610134  |
| 5             | 6             | -1.485734               | -1.629798 | 2.687663  |
| 6             | 6             | -2.605622               | -0.697403 | 2.227982  |
| 7             | 7             | -2.114134               | 0.568659  | 1.599142  |
| 8             | 6             | -1.665546               | 1.509563  | 2.669990  |
| 9             | 6             | -0.731818               | 2.625344  | 2.203072  |
| 10            | 7             | 0.539933                | 2.128921  | 1.589987  |
| 11            | 6             | 1.469790                | 1.686626  | 2.672619  |
| 12            | 6             | 2.590310                | 0.749453  | 2.224193  |
| 13            | 6             | 3.199493                | -1.099844 | 0.752531  |
| 14            | 6             | 2.604810                | -2.099315 | -0.243504 |
| 15            | 8             | 1.469965                | -1.851165 | -0.763344 |
| 16            | 6             | -1.128195               | -3.175261 | 0.748161  |
| 17            | 6             | -2.137810               | -2.574794 | -0.235201 |
| 18            | 8             | -1.898949               | -1.434292 | -0.743958 |

|    |   |           |           |           |
|----|---|-----------|-----------|-----------|
| 19 | 6 | -3.202285 | 1.135933  | 0.728389  |
| 20 | 6 | -2.591761 | 2.121337  | -0.273323 |
| 21 | 8 | -1.454647 | 1.862833  | -0.778942 |
| 22 | 6 | 1.116006  | 3.209612  | 0.716225  |
| 23 | 6 | 2.117021  | 2.590692  | -0.265236 |
| 24 | 8 | 1.869342  | 1.447188  | -0.760521 |
| 25 | 1 | 1.146834  | -0.845417 | 3.442895  |
| 26 | 1 | 2.507517  | -1.911424 | 3.197059  |
| 27 | 1 | 1.217364  | -3.215488 | 1.502590  |
| 28 | 1 | 0.505446  | -3.197210 | 3.108648  |
| 29 | 1 | -0.878916 | -1.125530 | 3.442723  |
| 30 | 1 | -1.942843 | -2.487963 | 3.195499  |
| 31 | 1 | -3.252092 | -1.200701 | 1.507333  |
| 32 | 1 | -3.224963 | -0.479309 | 3.108487  |
| 33 | 1 | -1.163886 | 0.909585  | 3.432355  |
| 34 | 1 | -2.525417 | 1.971145  | 3.170883  |
| 35 | 1 | -1.230946 | 3.261403  | 1.470170  |
| 36 | 1 | -0.521579 | 3.256567  | 3.077041  |
| 37 | 1 | 0.862360  | 1.190535  | 3.432656  |
| 38 | 1 | 1.927606  | 2.549245  | 3.172325  |
| 39 | 1 | 3.236834  | 1.245397  | 1.498448  |
| 40 | 1 | 3.208996  | 0.542250  | 3.107769  |
| 41 | 1 | 3.502718  | -0.261183 | 0.113490  |
| 42 | 1 | -0.291793 | -3.469910 | 0.101814  |
| 43 | 1 | -3.505137 | 0.290711  | 0.098186  |
| 44 | 1 | 0.278847  | 3.504339  | 0.071270  |
| 45 | 8 | -0.012532 | -0.380518 | -2.602461 |
| 46 | 1 | 0.653707  | -1.082416 | -2.710755 |
| 47 | 1 | -0.860987 | -0.800881 | -2.822973 |
| 48 | 7 | 3.179060  | 3.287196  | -0.618854 |
| 49 | 7 | -3.288374 | 3.180866  | -0.633280 |
| 50 | 7 | -3.194341 | -3.282505 | -0.580656 |
| 51 | 7 | 3.309822  | -3.156317 | -0.590122 |
| 52 | 1 | 3.434107  | 4.215906  | -0.246124 |
| 53 | 1 | -4.212319 | 3.443777  | -0.253836 |
| 54 | 1 | -3.440924 | -4.212084 | -0.202908 |
| 55 | 1 | 4.234532  | -3.411081 | -0.205032 |
| 56 | 6 | 2.953768  | -4.142693 | -1.602173 |
| 57 | 1 | 2.804795  | -3.661709 | -2.574349 |
| 58 | 6 | 4.173523  | 2.906194  | -1.613431 |
| 59 | 1 | 3.702524  | 2.744535  | -2.588441 |
| 60 | 6 | -2.915943 | 4.160813  | -1.645437 |
| 61 | 1 | -1.983039 | 4.665184  | -1.373338 |
| 62 | 6 | -4.188463 | -2.922220 | -1.583481 |
| 63 | 1 | -3.713735 | -2.758394 | -2.556345 |
| 64 | 1 | 4.676238  | 1.977341  | -1.324776 |
| 65 | 1 | 2.024721  | -4.656262 | -1.334438 |
| 66 | 1 | -4.707717 | -2.000012 | -1.303001 |
| 67 | 1 | -2.765631 | 3.676234  | -2.615578 |
| 68 | 6 | -5.199241 | -4.110230 | -1.660650 |
| 69 | 8 | -4.952984 | -5.074127 | -0.871583 |
| 70 | 8 | -6.132285 | -3.979776 | -2.484184 |
| 71 | 6 | 4.135624  | -5.161404 | -1.670451 |
| 72 | 8 | 5.092872  | -4.923885 | -0.870651 |
| 73 | 8 | 4.007290  | -6.090954 | -2.498103 |
| 74 | 6 | 5.204243  | 4.076728  | -1.691466 |
| 75 | 8 | 4.968625  | 5.050655  | -0.911672 |
| 76 | 8 | 6.141136  | 3.924668  | -2.507195 |
| 77 | 6 | -4.085288 | 5.192852  | -1.724508 |
| 78 | 8 | -5.051322 | 4.969257  | -0.931401 |
| 79 | 8 | -3.940119 | 6.118900  | -2.553673 |
| 80 | 6 | 1.622350  | 4.458363  | 1.451034  |

|    |    |           |           |           |
|----|----|-----------|-----------|-----------|
| 81 | 1  | 2.559709  | 4.286181  | 1.986307  |
| 82 | 1  | 1.781173  | 5.266390  | 0.731744  |
| 83 | 1  | 0.875495  | 4.812478  | 2.165507  |
| 84 | 6  | -4.442088 | 1.655540  | 1.468966  |
| 85 | 1  | -5.258946 | 1.800719  | 0.756807  |
| 86 | 1  | -4.786920 | 0.922038  | 2.201605  |
| 87 | 1  | -4.263787 | 2.602848  | 1.984422  |
| 88 | 6  | -1.623071 | -4.420376 | 1.496637  |
| 89 | 1  | -2.559737 | -4.248856 | 2.033171  |
| 90 | 1  | -1.778796 | -5.236169 | 0.785556  |
| 91 | 1  | -0.871626 | -4.762906 | 2.211763  |
| 92 | 6  | 4.436498  | -1.605036 | 1.507713  |
| 93 | 1  | 4.258999  | -2.547709 | 2.031753  |
| 94 | 1  | 5.259296  | -1.753290 | 0.803154  |
| 95 | 1  | 4.772175  | -0.862163 | 2.235021  |
| 96 | 59 | -0.005672 | 0.010748  | -0.039447 |

E(RTPSSh) = -2544.1515271 Hartree

Zero-point correction = 0.781745 Hartree/particle

Sum of electronic and thermal Energies = -2543.316451 Hartree

Sum of electronic and thermal Enthalpies = -2543.315506 Hartree

Sum of electronic and thermal Free Energies = -2543.460710 Hartree

**Table S36.** [Nd(DOTMA-(gly)<sub>4</sub>(H<sub>2</sub>O)]<sup>-</sup> [SAP, Δ(λλλλ)], TPSSh/LCRECP/6-31G(d,p), aqueous solution (0 Imaginary Frequencies)

| Center<br>Number | Atomic<br>Number | Coordinates (Angstroms) |           |           |
|------------------|------------------|-------------------------|-----------|-----------|
|                  |                  | X                       | Y         | Z         |
| 1                | 7                | 2.094268                | -0.566499 | 1.603985  |
| 2                | 6                | 1.627905                | -1.488125 | 2.683098  |
| 3                | 6                | 0.678206                | -2.592062 | 2.220965  |
| 4                | 7                | -0.582964               | -2.075263 | 1.602125  |
| 5                | 6                | -1.505246               | -1.612106 | 2.682754  |
| 6                | 6                | -2.610412               | -0.661381 | 2.225279  |
| 7                | 7                | -2.094900               | 0.596471  | 1.599614  |
| 8                | 6                | -1.631467               | 1.525049  | 2.674357  |
| 9                | 6                | -0.681050               | 2.627323  | 2.209004  |
| 10               | 7                | 0.580084                | 2.108278  | 1.593119  |
| 11               | 6                | 1.501816                | 1.649228  | 2.675395  |
| 12               | 6                | 2.607200                | 0.696286  | 2.222798  |
| 13               | 6                | 3.174133                | -1.160978 | 0.740755  |
| 14               | 6                | 2.549034                | -2.140896 | -0.255936 |
| 15               | 8                | 1.420064                | -1.858597 | -0.770798 |
| 16               | 6                | -1.177915               | -3.150615 | 0.733047  |
| 17               | 6                | -2.170566               | -2.520133 | -0.248395 |
| 18               | 8                | -1.899889               | -1.383972 | -0.751338 |
| 19               | 6                | -3.169632               | 1.187338  | 0.727826  |
| 20               | 6                | -2.534040               | 2.159074  | -0.271431 |
| 21               | 8                | -1.402338               | 1.873044  | -0.774222 |
| 22               | 6                | 1.176362                | 3.177223  | 0.718337  |
| 23               | 6                | 2.159468                | 2.535074  | -0.266046 |
| 24               | 8                | 1.883588                | 1.396480  | -0.757657 |
| 25               | 1                | 1.131717                | -0.872454 | 3.436220  |
| 26               | 1                | 2.477861                | -1.958196 | 3.192803  |
| 27               | 1                | 1.168225                | -3.240669 | 1.492716  |
| 28               | 1                | 0.453718                | -3.214808 | 3.097253  |
| 29               | 1                | -0.889426               | -1.117446 | 3.436693  |
| 30               | 1                | -1.973797               | -2.464321 | 3.190043  |
| 31               | 1                | -3.265280               | -1.152319 | 1.503536  |
| 32               | 1                | -3.226629               | -0.433530 | 3.105454  |

|    |   |           |           |           |
|----|---|-----------|-----------|-----------|
| 33 | 1 | -1.136737 | 0.913935  | 3.432210  |
| 34 | 1 | -2.483231 | 1.997094  | 3.179232  |
| 35 | 1 | -1.170529 | 3.273602  | 1.478433  |
| 36 | 1 | -0.457557 | 3.253177  | 3.083477  |
| 37 | 1 | 0.885980  | 1.158295  | 3.431829  |
| 38 | 1 | 1.971368  | 2.503018  | 3.179244  |
| 39 | 1 | 3.261626  | 1.183592  | 1.498188  |
| 40 | 1 | 3.223535  | 0.474028  | 3.104326  |
| 41 | 1 | 3.493703  | -0.326931 | 0.103798  |
| 42 | 1 | -0.346916 | -3.459842 | 0.086686  |
| 43 | 1 | -3.489875 | 0.349776  | 0.095999  |
| 44 | 1 | 0.344015  | 3.490798  | 0.076116  |
| 45 | 8 | -0.029286 | -0.297090 | -2.580162 |
| 46 | 1 | 0.632358  | -0.993362 | -2.737870 |
| 47 | 1 | -0.883850 | -0.707871 | -2.796001 |
| 48 | 7 | 3.236606  | 3.205404  | -0.624278 |
| 49 | 7 | -3.202692 | 3.236472  | -0.631222 |
| 50 | 7 | -3.247445 | -3.195004 | -0.596054 |
| 51 | 7 | 3.220198  | -3.218683 | -0.605970 |
| 52 | 1 | 3.514856  | 4.127696  | -0.252770 |
| 53 | 1 | -4.119422 | 3.522505  | -0.251605 |
| 54 | 1 | -3.522344 | -4.116676 | -0.219090 |
| 55 | 1 | 4.135117  | -3.504141 | -0.220076 |
| 56 | 6 | 2.824156  | -4.197474 | -1.610653 |
| 57 | 1 | 2.695594  | -3.718462 | -2.586713 |
| 58 | 6 | 4.221614  | 2.795949  | -1.617135 |
| 59 | 1 | 3.747840  | 2.646285  | -2.592713 |
| 60 | 6 | -2.800161 | 4.210968  | -1.637257 |
| 61 | 1 | -1.853075 | 4.685833  | -1.361173 |
| 62 | 6 | -4.236985 | -2.794963 | -1.588474 |
| 63 | 1 | -3.766200 | -2.648064 | -2.565940 |
| 64 | 1 | 4.697969  | 1.853907  | -1.326679 |
| 65 | 1 | 1.874233  | -4.669341 | -1.339491 |
| 66 | 1 | -4.716627 | -1.853627 | -1.301254 |
| 67 | 1 | -2.663003 | 3.727892  | -2.610086 |
| 68 | 6 | -5.294553 | -3.941951 | -1.657126 |
| 69 | 8 | -5.076955 | -4.917829 | -0.874556 |
| 70 | 8 | -6.231420 | -3.771397 | -2.468953 |
| 71 | 6 | 3.961768  | -5.265659 | -1.670759 |
| 72 | 8 | 4.929252  | -5.062055 | -0.874137 |
| 73 | 8 | 3.792815  | -6.196045 | -2.490264 |
| 74 | 6 | 5.285109  | 3.936707  | -1.694969 |
| 75 | 8 | 5.074799  | 4.919170  | -0.918784 |
| 76 | 8 | 6.219926  | 3.755350  | -2.507111 |
| 77 | 6 | -3.937645 | 5.278231  | -1.711768 |
| 78 | 8 | -4.911256 | 5.079569  | -0.921430 |
| 79 | 8 | -3.762771 | 6.204177  | -2.535343 |
| 80 | 6 | 1.713784  | 4.413453  | 1.451839  |
| 81 | 1 | 2.648318  | 4.219391  | 1.984580  |
| 82 | 1 | 1.890095  | 5.217228  | 0.731789  |
| 83 | 1 | 0.977348  | 4.785469  | 2.168041  |
| 84 | 6 | -4.398697 | 1.734223  | 1.466295  |
| 85 | 1 | -5.209189 | 1.901743  | 0.751692  |
| 86 | 1 | -4.763901 | 1.006888  | 2.195223  |
| 87 | 1 | -4.199646 | 2.675344  | 1.985480  |
| 88 | 6 | -1.703239 | -4.388235 | 1.472661  |
| 89 | 1 | -2.634460 | -4.197486 | 2.012239  |
| 90 | 1 | -1.881243 | -5.193817 | 0.755101  |
| 91 | 1 | -0.959635 | -4.755827 | 2.183560  |
| 92 | 6 | 4.402098  | -1.699058 | 1.487429  |
| 93 | 1 | 4.203642  | -2.636773 | 2.012920  |
| 94 | 1 | 5.215369  | -1.869545 | 0.776755  |

|    |    |           |           |           |
|----|----|-----------|-----------|-----------|
| 95 | 1  | 4.762877  | -0.965430 | 2.212136  |
| 96 | 60 | -0.000923 | 0.011064  | -0.026247 |

E(RTPSSh) = -2544.7743983 Hartree

Zero-point correction = 0.782050 Hartree/particle

Sum of electronic and thermal Energies = -2543.939091 Hartree

Sum of electronic and thermal Enthalpies = -2543.938147 Hartree

Sum of electronic and thermal Free Energies = -2544.082530 Hartree

**Table S37.** [Sm(DOTMA-(gly)<sub>4</sub>(H<sub>2</sub>O)]<sup>-</sup> [SAP, Δ(λλλλ)], TPSSh/LCRECP/6-31G(d,p), aqueous solution (0 Imaginary Frequencies)

| Center Number | Atomic Number | Coordinates (Angstroms) |           |           |
|---------------|---------------|-------------------------|-----------|-----------|
|               |               | X                       | Y         | Z         |
| 1             | 7             | 2.092101                | -0.545250 | 1.628448  |
| 2             | 6             | 1.643699                | -1.474947 | 2.708247  |
| 3             | 6             | 0.704019                | -2.585544 | 2.244955  |
| 4             | 7             | -0.559142               | -2.074125 | 1.626362  |
| 5             | 6             | -1.488695               | -1.629372 | 2.708560  |
| 6             | 6             | -2.600760               | -0.688470 | 2.251093  |
| 7             | 7             | -2.091053               | 0.571940  | 1.626528  |
| 8             | 6             | -1.643983               | 1.506911  | 2.702742  |
| 9             | 6             | -0.704372               | 2.616496  | 2.236174  |
| 10            | 7             | 0.558419                | 2.103308  | 1.619359  |
| 11            | 6             | 1.488336                | 1.661725  | 2.702029  |
| 12            | 6             | 2.600194                | 0.718984  | 2.247514  |
| 13            | 6             | 3.170988                | -1.127728 | 0.756542  |
| 14            | 6             | 2.544095                | -2.098503 | -0.246195 |
| 15            | 8             | 1.403728                | -1.821181 | -0.738893 |
| 16            | 6             | -1.142379               | -3.148999 | 0.749514  |
| 17            | 6             | -2.126127               | -2.517974 | -0.238704 |
| 18            | 8             | -1.860710               | -1.370976 | -0.720596 |
| 19            | 6             | -3.166106               | 1.151996  | 0.748512  |
| 20            | 6             | -2.530130               | 2.115638  | -0.256662 |
| 21            | 8             | -1.387897               | 1.835962  | -0.738847 |
| 22            | 6             | 1.142246                | 3.172030  | 0.736324  |
| 23            | 6             | 2.116955                | 2.528958  | -0.254214 |
| 24            | 8             | 1.847376                | 1.379644  | -0.724172 |
| 25            | 1             | 1.145138                | -0.867489 | 3.466594  |
| 26            | 1             | 2.502234                | -1.936948 | 3.210770  |
| 27            | 1             | 1.199149                | -3.228648 | 1.515327  |
| 28            | 1             | 0.482961                | -3.212372 | 3.119088  |
| 29            | 1             | -0.880477               | -1.132807 | 3.467523  |
| 30            | 1             | -1.948836               | -2.490358 | 3.208531  |
| 31            | 1             | -3.249950               | -1.184076 | 1.527397  |
| 32            | 1             | -3.221130               | -0.464932 | 3.129332  |
| 33            | 1             | -1.145687               | 0.902845  | 3.464028  |
| 34            | 1             | -2.503571               | 1.970042  | 3.202440  |
| 35            | 1             | -1.199586               | 3.257212  | 1.504583  |
| 36            | 1             | -0.483765               | 3.246164  | 3.108482  |
| 37            | 1             | 0.880654                | 1.168165  | 3.463438  |
| 38            | 1             | 1.949752                | 2.523941  | 3.198820  |
| 39            | 1             | 3.248508                | 1.211685  | 1.521093  |
| 40            | 1             | 3.221125                | 0.499672  | 3.126412  |
| 41            | 1             | 3.485170                | -0.287130 | 0.126094  |
| 42            | 1             | -0.304879               | -3.453582 | 0.109901  |
| 43            | 1             | -3.482436               | 0.308685  | 0.122911  |
| 44            | 1             | 0.303070                | 3.480167  | 0.100898  |
| 45            | 8             | -0.037856               | -0.244829 | -2.499944 |
| 46            | 1             | 0.629484                | -0.933811 | -2.665833 |

|    |    |           |           |           |
|----|----|-----------|-----------|-----------|
| 47 | 1  | -0.891199 | -0.670832 | -2.691502 |
| 48 | 7  | 3.178315  | 3.208614  | -0.640170 |
| 49 | 7  | -3.208596 | 3.177317  | -0.643243 |
| 50 | 7  | -3.187274 | -3.201831 | -0.614405 |
| 51 | 7  | 3.224013  | -3.160773 | -0.624467 |
| 52 | 1  | 3.446969  | 4.141268  | -0.287720 |
| 53 | 1  | -4.136149 | 3.453160  | -0.282690 |
| 54 | 1  | -3.453430 | -4.133745 | -0.256249 |
| 55 | 1  | 4.149753  | -3.437372 | -0.258076 |
| 56 | 6  | 2.831382  | -4.126198 | -1.643267 |
| 57 | 1  | 2.676545  | -3.629669 | -2.606615 |
| 58 | 6  | 4.150070  | 2.803743  | -1.647812 |
| 59 | 1  | 3.658772  | 2.628896  | -2.610390 |
| 60 | 6  | -2.811604 | 4.137835  | -1.664741 |
| 61 | 1  | -1.880604 | 4.641148  | -1.384349 |
| 62 | 6  | -4.163315 | -2.806499 | -1.621930 |
| 63 | 1  | -3.675022 | -2.635148 | -2.586696 |
| 64 | 1  | 4.652855  | 1.876850  | -1.353210 |
| 65 | 1  | 1.896541  | -4.624177 | -1.366500 |
| 66 | 1  | -4.668822 | -1.880027 | -1.330884 |
| 67 | 1  | -2.647399 | 3.636288  | -2.623865 |
| 68 | 6  | -5.195034 | -3.974186 | -1.729671 |
| 69 | 8  | -4.973404 | -4.956690 | -0.956505 |
| 70 | 8  | -6.118330 | -3.811108 | -2.558262 |
| 71 | 6  | 3.990166  | -5.168597 | -1.743997 |
| 72 | 8  | 4.965627  | -4.961413 | -0.958063 |
| 73 | 8  | 3.827775  | -6.084891 | -2.580429 |
| 74 | 6  | 5.187332  | 3.965291  | -1.765799 |
| 75 | 8  | 4.973884  | 4.954168  | -0.998636 |
| 76 | 8  | 6.107530  | 3.791768  | -2.596077 |
| 77 | 6  | -3.971975 | 5.176571  | -1.781293 |
| 78 | 8  | -4.952922 | 4.973734  | -1.001125 |
| 79 | 8  | -3.805530 | 6.087303  | -2.623321 |
| 80 | 6  | 1.681260  | 4.413032  | 1.460606  |
| 81 | 1  | 2.625351  | 4.227205  | 1.979199  |
| 82 | 1  | 1.839971  | 5.217756  | 0.737512  |
| 83 | 1  | 0.952585  | 4.779729  | 2.187515  |
| 84 | 6  | -4.398834 | 1.700616  | 1.479665  |
| 85 | 1  | -5.211075 | 1.851632  | 0.763367  |
| 86 | 1  | -4.758295 | 0.980858  | 2.218999  |
| 87 | 1  | -4.206864 | 2.650567  | 1.985179  |
| 88 | 6  | -1.670322 | -4.390808 | 1.480346  |
| 89 | 1  | -2.611864 | -4.207853 | 2.004481  |
| 90 | 1  | -1.829779 | -5.197971 | 0.760201  |
| 91 | 1  | -0.935391 | -4.752375 | 2.203360  |
| 92 | 6  | 4.403979  | -1.668086 | 1.493289  |
| 93 | 1  | 4.213721  | -2.615139 | 2.004832  |
| 94 | 1  | 5.217749  | -1.821405 | 0.779273  |
| 95 | 1  | 4.760153  | -0.942493 | 2.228389  |
| 96 | 62 | -0.000325 | 0.012526  | 0.028995  |

-----

E(RTPSSh) = -2545.9974591 Hartree  
Zero-point correction = 0.782634 Hartree/particle  
Sum of electronic and thermal Energies = -2545.161819 Hartree  
Sum of electronic and thermal Enthalpies = -2545.160875 Hartree  
Sum of electronic and thermal Free Energies = -2545.304276 Hartree

**Table S38.** [Eu(DOTMA-(gly)<sub>4</sub>(H<sub>2</sub>O)]<sup>-</sup> [SAP, Δ(λλλλ)], TPSSh/LCRECP/6-31G(d,p), aqueous solution (0 Imaginary Frequencies)

-----

| Center | Atomic | Coordinates (Angstroms) |  |  |
|--------|--------|-------------------------|--|--|
|--------|--------|-------------------------|--|--|

| Number | Number | X         | Y         | Z         |
|--------|--------|-----------|-----------|-----------|
| 1      | 7      | 2.092667  | -0.530070 | 1.642756  |
| 2      | 6      | 1.654223  | -1.464488 | 2.722497  |
| 3      | 6      | 0.722760  | -2.580814 | 2.258120  |
| 4      | 7      | -0.542619 | -2.075341 | 1.639681  |
| 5      | 6      | -1.476302 | -1.641420 | 2.722629  |
| 6      | 6      | -2.594378 | -0.708453 | 2.265465  |
| 7      | 7      | -2.091045 | 0.554766  | 1.641930  |
| 8      | 6      | -1.653439 | 1.492997  | 2.719149  |
| 9      | 6      | -0.722425 | 2.608941  | 2.252319  |
| 10     | 7      | 0.542496  | 2.102271  | 1.634954  |
| 11     | 6      | 1.476670  | 1.670282  | 2.717811  |
| 12     | 6      | 2.594561  | 0.736125  | 2.262294  |
| 13     | 6      | 3.172965  | -1.104075 | 0.767563  |
| 14     | 6      | 2.548312  | -2.071416 | -0.238927 |
| 15     | 8      | 1.401256  | -1.800550 | -0.720064 |
| 16     | 6      | -1.117685 | -3.151205 | 0.759218  |
| 17     | 6      | -2.098504 | -2.522158 | -0.232254 |
| 18     | 8      | -1.839540 | -1.368677 | -0.702663 |
| 19     | 6      | -3.167847 | 1.127498  | 0.761803  |
| 20     | 6      | -2.534266 | 2.088070  | -0.246942 |
| 21     | 8      | -1.386131 | 1.814724  | -0.718654 |
| 22     | 6      | 1.118030  | 3.172672  | 0.748944  |
| 23     | 6      | 2.089963  | 2.532000  | -0.245082 |
| 24     | 8      | 1.826929  | 1.376813  | -0.704351 |
| 25     | 1      | 1.152050  | -0.861933 | 3.482413  |
| 26     | 1      | 2.517510  | -1.920061 | 3.222713  |
| 27     | 1      | 1.222136  | -3.219578 | 1.527622  |
| 28     | 1      | 0.505015  | -3.210344 | 3.131095  |
| 29     | 1      | -0.872581 | -1.141816 | 3.483229  |
| 30     | 1      | -1.929646 | -2.507575 | 3.219845  |
| 31     | 1      | -3.239341 | -1.207761 | 1.540561  |
| 32     | 1      | -3.217206 | -0.489116 | 3.142977  |
| 33     | 1      | -1.151111 | 0.892883  | 3.480944  |
| 34     | 1      | -2.517560 | 1.948942  | 3.217594  |
| 35     | 1      | -1.222129 | 3.245790  | 1.520423  |
| 36     | 1      | -0.504944 | 3.240615  | 3.123906  |
| 37     | 1      | 0.873566  | 1.172758  | 3.480313  |
| 38     | 1      | 1.931217  | 2.537157  | 3.212782  |
| 39     | 1      | 3.238531  | 1.233493  | 1.535215  |
| 40     | 1      | 3.218039  | 0.519895  | 3.140097  |
| 41     | 1      | 3.483286  | -0.259436 | 0.140891  |
| 42     | 1      | -0.276377 | -3.451593 | 0.122878  |
| 43     | 1      | -3.481144 | 0.280777  | 0.139565  |
| 44     | 1      | 0.274955  | 3.476840  | 0.117003  |
| 45     | 8      | -0.034577 | -0.224708 | -2.461376 |
| 46     | 1      | 0.637226  | -0.910367 | -2.623939 |
| 47     | 1      | -0.885516 | -0.658750 | -2.646405 |
| 48     | 63     | -0.000077 | 0.013113  | 0.056944  |
| 49     | 7      | 3.140924  | 3.219436  | -0.645160 |
| 50     | 7      | -3.220774 | 3.139090  | -0.647950 |
| 51     | 7      | -3.148943 | -3.213742 | -0.622872 |
| 52     | 7      | 3.236197  | -3.122656 | -0.632652 |
| 53     | 1      | 3.401271  | 4.158421  | -0.303107 |
| 54     | 1      | -4.155094 | 3.406276  | -0.298275 |
| 55     | 1      | -3.407348 | -4.151956 | -0.275116 |
| 56     | 1      | 4.168924  | -3.391084 | -0.277653 |
| 57     | 6      | 2.849765  | -4.079855 | -1.661502 |
| 58     | 1      | 2.677294  | -3.572308 | -2.616044 |
| 59     | 6      | 4.104832  | 2.821588  | -1.663031 |
| 60     | 1      | 3.602852  | 2.629583  | -2.616751 |



|    |   |           |           |           |
|----|---|-----------|-----------|-----------|
| 61 | 6 | -2.831093 | 4.090638  | -1.680536 |
| 62 | 1 | -1.912360 | 4.615634  | -1.399356 |
| 63 | 6 | -4.118024 | -2.824545 | -1.639430 |
| 64 | 1 | -3.620291 | -2.637707 | -2.596448 |
| 65 | 1 | 4.628049  | 1.906369  | -1.367445 |
| 66 | 1 | 1.926407  | -4.597931 | -1.383065 |
| 67 | 1 | -4.641788 | -1.908660 | -1.347195 |
| 68 | 1 | -2.648517 | 3.577247  | -2.629980 |
| 69 | 6 | -5.129881 | -4.007384 | -1.769622 |
| 70 | 8 | -4.903024 | -4.992147 | -1.000817 |
| 71 | 8 | -6.044564 | -3.852537 | -2.609144 |
| 72 | 6 | 4.025241  | -5.100720 | -1.787800 |
| 73 | 8 | 5.003793  | -4.888577 | -1.007005 |
| 74 | 8 | 3.871117  | -6.007185 | -2.636331 |
| 75 | 6 | 5.120093  | 3.999759  | -1.806243 |
| 76 | 8 | 4.901264  | 4.991180  | -1.043854 |
| 77 | 8 | 6.030411  | 3.835242  | -2.649093 |
| 78 | 6 | -4.009116 | 5.105943  | -1.824200 |
| 79 | 8 | -4.992560 | 4.898770  | -1.048312 |
| 80 | 8 | -3.852183 | 6.005026  | -2.680417 |
| 81 | 6 | 1.655033  | 4.416566  | 1.469788  |
| 82 | 1 | 2.604070  | 4.236360  | 1.981245  |
| 83 | 1 | 1.803314  | 5.222745  | 0.746109  |
| 84 | 1 | 0.929390  | 4.778367  | 2.202221  |
| 85 | 6 | -4.402859 | 1.674642  | 1.490284  |
| 86 | 1 | -5.216875 | 1.815770  | 0.773997  |
| 87 | 1 | -4.757381 | 0.958051  | 2.235119  |
| 88 | 1 | -4.215840 | 2.629279  | 1.988725  |
| 89 | 6 | -1.643920 | -4.396229 | 1.485899  |
| 90 | 1 | -2.590560 | -4.219123 | 2.002784  |
| 91 | 1 | -1.792760 | -5.204487 | 0.764722  |
| 92 | 1 | -0.912234 | -4.753209 | 2.214521  |
| 93 | 6 | 4.408925  | -1.642987 | 1.500464  |
| 94 | 1 | 4.224315  | -2.595162 | 2.004462  |
| 95 | 1 | 5.224053  | -1.785603 | 0.785791  |
| 96 | 1 | 4.760321  | -0.920885 | 2.241329  |

E(RTPSSh) = -2546.5947156 Hartree

Zero-point correction = 0.782749 Hartree/particle

Sum of electronic and thermal Energies = -2545.758986 Hartree

Sum of electronic and thermal Enthalpies = -2545.758042 Hartree

Sum of electronic and thermal Free Energies = -2545.901914 Hartree

**Table S39.** [Gd(DOTMA-(gly)<sub>4</sub>(H<sub>2</sub>O)]<sup>-</sup> [SAP, Δ(λλλλ)], TPSSh/LCRECP/6-31G(d,p), aqueous solution (0 Imaginary Frequencies)

| Center Number | Atomic Number | Coordinates (Angstroms) |           |          |
|---------------|---------------|-------------------------|-----------|----------|
|               |               | X                       | Y         | Z        |
| 1             | 7             | 2.099857                | -0.495023 | 1.667631 |
| 2             | 6             | 1.678419                | -1.437343 | 2.747110 |
| 3             | 6             | 0.765489                | -2.568641 | 2.281997 |
| 4             | 7             | -0.507958               | -2.083713 | 1.664008 |
| 5             | 6             | -1.450038               | -1.667888 | 2.746651 |
| 6             | 6             | -2.582350               | -0.752385 | 2.289118 |
| 7             | 7             | -2.098931               | 0.518973  | 1.666656 |
| 8             | 6             | -1.678519               | 1.465149  | 2.743572 |
| 9             | 6             | -0.766045               | 2.596027  | 2.275909 |
| 10            | 7             | 0.506978                | 2.109708  | 1.659081 |
| 11            | 6             | 1.449466                | 1.695916  | 2.741742 |
| 12            | 6             | 2.581775                | 0.779264  | 2.286133 |

|    |   |           |           |           |
|----|---|-----------|-----------|-----------|
| 13 | 6 | 3.187044  | -1.050847 | 0.790340  |
| 14 | 6 | 2.574422  | -2.018929 | -0.222087 |
| 15 | 8 | 1.418175  | -1.766369 | -0.691353 |
| 16 | 6 | -1.064080 | -3.166399 | 0.780853  |
| 17 | 6 | -2.045458 | -2.549517 | -0.216962 |
| 18 | 8 | -1.804581 | -1.387178 | -0.675445 |
| 19 | 6 | -3.182649 | 1.073387  | 0.784310  |
| 20 | 6 | -2.560964 | 2.034507  | -0.230564 |
| 21 | 8 | -1.404208 | 1.778897  | -0.691002 |
| 22 | 6 | 1.063744  | 3.186735  | 0.770034  |
| 23 | 6 | 2.036868  | 2.557787  | -0.229671 |
| 24 | 8 | 1.793155  | 1.393313  | -0.675965 |
| 25 | 1 | 1.167085  | -0.843851 | 3.508201  |
| 26 | 1 | 2.549789  | -1.878834 | 3.245909  |
| 27 | 1 | 1.275176  | -3.197727 | 1.550227  |
| 28 | 1 | 0.558670  | -3.202983 | 3.154153  |
| 29 | 1 | -0.855662 | -1.160472 | 3.509549  |
| 30 | 1 | -1.890037 | -2.542556 | 3.240884  |
| 31 | 1 | -3.217672 | -1.261389 | 1.562449  |
| 32 | 1 | -3.210104 | -0.543961 | 3.165777  |
| 33 | 1 | -1.167076 | 0.874167  | 3.506589  |
| 34 | 1 | -2.550758 | 1.907019  | 3.240534  |
| 35 | 1 | -1.276035 | 3.223069  | 1.542622  |
| 36 | 1 | -0.559435 | 3.232589  | 3.146573  |
| 37 | 1 | 0.855603  | 1.190623  | 3.506484  |
| 38 | 1 | 1.890476  | 2.571447  | 3.233658  |
| 39 | 1 | 3.216273  | 1.286346  | 1.557440  |
| 40 | 1 | 3.209889  | 0.573990  | 3.163265  |
| 41 | 1 | 3.487988  | -0.199312 | 0.168599  |
| 42 | 1 | -0.215522 | -3.457005 | 0.149796  |
| 43 | 1 | -3.486519 | 0.219620  | 0.167206  |
| 44 | 1 | 0.213506  | 3.480842  | 0.143092  |
| 45 | 8 | -0.030112 | -0.208973 | -2.417566 |
| 46 | 1 | 0.651956  | -0.885628 | -2.575971 |
| 47 | 1 | -0.874669 | -0.659075 | -2.594371 |
| 48 | 7 | 3.066943  | 3.264712  | -0.649489 |
| 49 | 7 | -3.266283 | 3.065654  | -0.649950 |
| 50 | 7 | -3.075762 | -3.259884 | -0.626642 |
| 51 | 7 | 3.281395  | -3.050033 | -0.634461 |
| 52 | 1 | 3.305471  | 4.215576  | -0.324631 |
| 53 | 1 | -4.211640 | 3.312730  | -0.315387 |
| 54 | 1 | -3.312716 | -4.210004 | -0.296086 |
| 55 | 1 | 4.225649  | -3.298057 | -0.295202 |
| 56 | 6 | 2.913318  | -3.995261 | -1.680930 |
| 57 | 1 | 2.707362  | -3.470896 | -2.619550 |
| 58 | 6 | 4.018283  | 2.885575  | -1.686108 |
| 59 | 1 | 3.498818  | 2.658433  | -2.622530 |
| 60 | 6 | -2.894995 | 4.004502  | -1.700746 |
| 61 | 1 | -1.999893 | 4.569270  | -1.420245 |
| 62 | 6 | -4.031928 | -2.889600 | -1.662295 |
| 63 | 1 | -3.516385 | -2.666657 | -2.601927 |
| 64 | 1 | 4.583793  | 1.995997  | -1.389964 |
| 65 | 1 | 2.014045  | -4.553809 | -1.401748 |
| 66 | 1 | -4.598677 | -1.999986 | -1.368927 |
| 67 | 1 | -2.680118 | 3.474104  | -2.633889 |
| 68 | 6 | -4.993431 | -4.107882 | -1.839806 |
| 69 | 8 | -4.751911 | -5.095112 | -1.078635 |
| 70 | 8 | -5.888222 | -3.974599 | -2.704064 |
| 71 | 6 | 4.123041  | -4.968885 | -1.850467 |
| 72 | 8 | 5.103761  | -4.743069 | -1.076243 |
| 73 | 8 | 3.990007  | -5.856539 | -2.722078 |
| 74 | 6 | 4.983784  | 4.098581  | -1.875762 |

|    |    |           |           |           |
|----|----|-----------|-----------|-----------|
| 75 | 8  | 4.749908  | 5.092707  | -1.121394 |
| 76 | 8  | 5.874902  | 3.955196  | -2.742626 |
| 77 | 6  | -4.106203 | 4.972878  | -1.886931 |
| 78 | 8  | -5.091565 | 4.752768  | -1.117056 |
| 79 | 8  | -3.970037 | 5.852593  | -2.766467 |
| 80 | 6  | 1.589709  | 4.437219  | 1.487919  |
| 81 | 1  | 2.547089  | 4.270325  | 1.988180  |
| 82 | 1  | 1.717168  | 5.247793  | 0.765230  |
| 83 | 1  | 0.866579  | 4.785448  | 2.229450  |
| 84 | 6  | -4.423845 | 1.609962  | 1.510400  |
| 85 | 1  | -5.241997 | 1.731875  | 0.795334  |
| 86 | 1  | -4.765601 | 0.895487  | 2.263268  |
| 87 | 1  | -4.249415 | 2.572122  | 1.998799  |
| 88 | 6  | -1.579547 | -4.417706 | 1.504760  |
| 89 | 1  | -2.534881 | -4.253937 | 2.009865  |
| 90 | 1  | -1.706917 | -5.230640 | 0.784772  |
| 91 | 1  | -0.850769 | -4.760578 | 2.243093  |
| 92 | 6  | 4.429104  | -1.579059 | 1.520986  |
| 93 | 1  | 4.257179  | -2.538841 | 2.014882  |
| 94 | 1  | 5.248507  | -1.702198 | 0.807619  |
| 95 | 1  | 4.767397  | -0.859045 | 2.270018  |
| 96 | 64 | -0.000114 | 0.013810  | 0.092362  |

E(RTPSSh) = -2547.1848096 Hartree

Zero-point correction = 0.782524 Hartree/particle

Sum of electronic and thermal Energies = -2546.349186 Hartree

Sum of electronic and thermal Enthalpies = -2546.348242 Hartree

Sum of electronic and thermal Free Energies = -2546.492923 Hartree

**Table S40.** [Tb(DOTMA-(gly)<sub>4</sub>(H<sub>2</sub>O)]<sup>-</sup> [SAP, Δ(λλλλ)], TPSSh/LCRECP/6-31G(d,p), aqueous solution (0 Imaginary Frequencies)

| Center Number | Atomic Number | Coordinates (Angstroms) |           |           |
|---------------|---------------|-------------------------|-----------|-----------|
|               |               | X                       | Y         | Z         |
| 1             | 7             | 0.462196                | 2.108049  | 1.683115  |
| 2             | 6             | 1.411078                | 1.718875  | 2.768353  |
| 3             | 6             | 2.561342                | 0.826565  | 2.312074  |
| 4             | 7             | 2.099226                | -0.454109 | 1.692589  |
| 5             | 6             | 1.702667                | -1.404751 | 2.773040  |
| 6             | 6             | 0.813972                | -2.552931 | 2.305090  |
| 7             | 7             | -0.465617               | -2.086623 | 1.686460  |
| 8             | 6             | -1.415447               | -1.695844 | 2.770642  |
| 9             | 6             | -2.565171               | -0.804576 | 2.311376  |
| 10            | 7             | -2.101191               | 0.473735  | 1.689290  |
| 11            | 6             | -1.706798               | 1.427606  | 2.768122  |
| 12            | 6             | -0.817888               | 2.575516  | 2.299170  |
| 13            | 6             | 1.000196                | 3.191383  | 0.790339  |
| 14            | 6             | 1.972841                | 2.572192  | -0.214457 |
| 15            | 8             | 1.749655                | 1.396544  | -0.641535 |
| 16            | 6             | 3.193056                | -0.989462 | 0.811274  |
| 17            | 6             | 2.590933                | -1.954829 | -0.208442 |
| 18            | 8             | 1.423563                | -1.720653 | -0.659975 |
| 19            | 6             | -1.001852               | -3.175186 | 0.798708  |
| 20            | 6             | -1.980867               | -2.567569 | -0.205485 |
| 21            | 8             | -1.757888               | -1.394400 | -0.645279 |
| 22            | 6             | -3.190917               | 1.008016  | 0.802304  |
| 23            | 6             | -2.578531               | 1.967426  | -0.218215 |
| 24            | 8             | -1.410977               | 1.730141  | -0.660756 |
| 25            | 1             | 0.827482                | 1.201882  | 3.533222  |
| 26            | 1             | 1.831679                | 2.605071  | 3.258858  |

|    |   |           |           |           |
|----|---|-----------|-----------|-----------|
| 27 | 1 | 3.184592  | 1.346429  | 1.582652  |
| 28 | 1 | 3.194958  | 0.631081  | 3.187370  |
| 29 | 1 | 1.179793  | -0.823009 | 3.535385  |
| 30 | 1 | 2.584705  | -1.826950 | 3.269602  |
| 31 | 1 | 1.336361  | -3.169672 | 1.571703  |
| 32 | 1 | 0.616674  | -3.194227 | 3.174263  |
| 33 | 1 | -0.832345 | -1.176992 | 3.534590  |
| 34 | 1 | -1.835711 | -2.581320 | 3.262643  |
| 35 | 1 | -3.188117 | -1.326007 | 1.582760  |
| 36 | 1 | -3.199784 | -0.606668 | 3.185422  |
| 37 | 1 | -1.184825 | 0.847929  | 3.532693  |
| 38 | 1 | -2.590163 | 1.850101  | 3.262065  |
| 39 | 1 | -1.339658 | 3.190359  | 1.563782  |
| 40 | 1 | -0.621867 | 3.218696  | 3.167292  |
| 41 | 1 | 0.142852  | 3.475651  | 0.168926  |
| 42 | 1 | 3.484165  | -0.129844 | 0.196385  |
| 43 | 1 | -0.145461 | -3.456141 | 0.174270  |
| 44 | 1 | -3.484212 | 0.146584  | 0.191148  |
| 45 | 8 | -0.020612 | -0.173089 | -2.354613 |
| 46 | 1 | 0.660823  | -0.850714 | -2.511842 |
| 47 | 1 | -0.864841 | -0.620747 | -2.538343 |
| 48 | 7 | -3.300590 | 2.976455  | -0.661828 |
| 49 | 7 | -2.989083 | -3.294225 | -0.640287 |
| 50 | 7 | 3.315600  | -2.962505 | -0.646444 |
| 51 | 7 | 2.979783  | 3.296872  | -0.659156 |
| 52 | 1 | -4.255861 | 3.206317  | -0.343447 |
| 53 | 1 | -3.207831 | -4.254721 | -0.327569 |
| 54 | 1 | 4.270317  | -3.192584 | -0.324017 |
| 55 | 1 | 3.198519  | 4.258425  | -0.352300 |
| 56 | 6 | 3.919343  | 2.929258  | -1.710631 |
| 57 | 1 | 3.386424  | 2.671859  | -2.631512 |
| 58 | 6 | -2.940002 | 3.902831  | -1.727384 |
| 59 | 1 | -2.698115 | 3.358770  | -2.645912 |
| 60 | 6 | -3.932323 | -2.934507 | -1.691469 |
| 61 | 1 | -4.531614 | -2.066799 | -1.397119 |
| 62 | 6 | 2.960224  | -3.893070 | -1.710395 |
| 63 | 1 | 2.724701  | -3.352496 | -2.632683 |
| 64 | 1 | -2.064321 | 4.497551  | -1.447475 |
| 65 | 1 | 4.517665  | 2.061657  | -1.413739 |
| 66 | 1 | 2.082390  | -4.485335 | -1.432445 |
| 67 | 1 | -3.402415 | -2.681058 | -2.615196 |
| 68 | 6 | 4.196034  | -4.825112 | -1.920740 |
| 69 | 8 | 5.179058  | -4.591536 | -1.151773 |
| 70 | 8 | 4.078608  | -5.691830 | -2.815287 |
| 71 | 6 | 4.843834  | 4.167057  | -1.940278 |
| 72 | 8 | 4.598123  | 5.165276  | -1.195153 |
| 73 | 8 | 5.718745  | 4.036623  | -2.825472 |
| 74 | 6 | -4.174185 | 4.833787  | -1.950147 |
| 75 | 8 | -5.162578 | 4.605493  | -1.186565 |
| 76 | 8 | -4.050995 | 5.695900  | -2.848778 |
| 77 | 6 | -4.853541 | -4.176967 | -1.910248 |
| 78 | 8 | -4.602787 | -5.168050 | -1.157154 |
| 79 | 8 | -5.729920 | -4.056329 | -2.794941 |
| 80 | 6 | -4.439642 | 1.535409  | 1.522383  |
| 81 | 1 | -4.279274 | 2.505741  | 1.999289  |
| 82 | 1 | -5.259535 | 1.636931  | 0.806141  |
| 83 | 1 | -4.771132 | 0.824823  | 2.283565  |
| 84 | 6 | -1.509360 | -4.433148 | 1.516917  |
| 85 | 1 | -1.615571 | -5.248404 | 0.796144  |
| 86 | 1 | -0.785425 | -4.765242 | 2.264965  |
| 87 | 1 | -2.473533 | -4.282738 | 2.009161  |
| 88 | 6 | 4.441800  | -1.509317 | 1.536715  |

|    |    |           |           |          |
|----|----|-----------|-----------|----------|
| 89 | 1  | 4.283448  | -2.477819 | 2.017931 |
| 90 | 1  | 5.263805  | -1.611179 | 0.822999 |
| 91 | 1  | 4.768818  | -0.793957 | 2.295236 |
| 92 | 6  | 1.516821  | 4.448513  | 1.503628 |
| 93 | 1  | 2.482453  | 4.294965  | 1.992107 |
| 94 | 1  | 1.623876  | 5.261724  | 0.780618 |
| 95 | 1  | 0.797485  | 4.785621  | 2.254021 |
| 96 | 66 | -0.000247 | 0.013594  | 0.132652 |

E(RTPSSh) = -2547.7748475 Hartree

Zero-point correction = 0.782674 Hartree/particle

Sum of electronic and thermal Energies = -2546.939179 Hartree

Sum of electronic and thermal Enthalpies = -2546.938235 Hartree

Sum of electronic and thermal Free Energies = -2547.082011 Hartree

**Table S41.** [Dy(DOTMA-(gly)<sub>4</sub>(H<sub>2</sub>O)]<sup>-</sup> [SAP, Δ(λλλλ)], TPSSh/LCRECP/6-31G(d,p), aqueous solution (0 Imaginary Frequencies)

| Center Number | Atomic Number | Coordinates (Angstroms) |           |           |
|---------------|---------------|-------------------------|-----------|-----------|
|               |               | X                       | Y         | Z         |
| 1             | 7             | 0.462196                | 2.108049  | 1.683115  |
| 2             | 6             | 1.411078                | 1.718875  | 2.768353  |
| 3             | 6             | 2.561342                | 0.826565  | 2.312074  |
| 4             | 7             | 2.099226                | -0.454109 | 1.692589  |
| 5             | 6             | 1.702667                | -1.404751 | 2.773040  |
| 6             | 6             | 0.813972                | -2.552931 | 2.305090  |
| 7             | 7             | -0.465617               | -2.086623 | 1.686460  |
| 8             | 6             | -1.415447               | -1.695844 | 2.770642  |
| 9             | 6             | -2.565171               | -0.804576 | 2.311376  |
| 10            | 7             | -2.101191               | 0.473735  | 1.689290  |
| 11            | 6             | -1.706798               | 1.427606  | 2.768122  |
| 12            | 6             | -0.817888               | 2.575516  | 2.299170  |
| 13            | 6             | 1.000196                | 3.191383  | 0.790339  |
| 14            | 6             | 1.972841                | 2.572192  | -0.214457 |
| 15            | 8             | 1.749655                | 1.396544  | -0.641535 |
| 16            | 6             | 3.193056                | -0.989462 | 0.811274  |
| 17            | 6             | 2.590933                | -1.954829 | -0.208442 |
| 18            | 8             | 1.423563                | -1.720653 | -0.659975 |
| 19            | 6             | -1.001852               | -3.175186 | 0.798708  |
| 20            | 6             | -1.980867               | -2.567569 | -0.205485 |
| 21            | 8             | -1.757888               | -1.394400 | -0.645279 |
| 22            | 6             | -3.190917               | 1.008016  | 0.802304  |
| 23            | 6             | -2.578531               | 1.967426  | -0.218215 |
| 24            | 8             | -1.410977               | 1.730141  | -0.660756 |
| 25            | 1             | 0.827482                | 1.201882  | 3.533222  |
| 26            | 1             | 1.831679                | 2.605071  | 3.258858  |
| 27            | 1             | 3.184592                | 1.346429  | 1.582652  |
| 28            | 1             | 3.194958                | 0.631081  | 3.187370  |
| 29            | 1             | 1.179793                | -0.823009 | 3.535385  |
| 30            | 1             | 2.584705                | -1.826950 | 3.269602  |
| 31            | 1             | 1.336361                | -3.169672 | 1.571703  |
| 32            | 1             | 0.616674                | -3.194227 | 3.174263  |
| 33            | 1             | -0.832345               | -1.176992 | 3.534590  |
| 34            | 1             | -1.835711               | -2.581320 | 3.262643  |
| 35            | 1             | -3.188117               | -1.326007 | 1.582760  |
| 36            | 1             | -3.199784               | -0.606668 | 3.185422  |
| 37            | 1             | -1.184825               | 0.847929  | 3.532693  |
| 38            | 1             | -2.590163               | 1.850101  | 3.262065  |
| 39            | 1             | -1.339658               | 3.190359  | 1.563782  |
| 40            | 1             | -0.621867               | 3.218696  | 3.167292  |

|    |    |           |           |           |
|----|----|-----------|-----------|-----------|
| 41 | 1  | 0.142852  | 3.475651  | 0.168926  |
| 42 | 1  | 3.484165  | -0.129844 | 0.196385  |
| 43 | 1  | -0.145461 | -3.456141 | 0.174270  |
| 44 | 1  | -3.484212 | 0.146584  | 0.191148  |
| 45 | 8  | -0.020612 | -0.173089 | -2.354613 |
| 46 | 1  | 0.660823  | -0.850714 | -2.511842 |
| 47 | 1  | -0.864841 | -0.620747 | -2.538343 |
| 48 | 7  | -3.300590 | 2.976455  | -0.661828 |
| 49 | 7  | -2.989083 | -3.294225 | -0.640287 |
| 50 | 7  | 3.315600  | -2.962505 | -0.646444 |
| 51 | 7  | 2.979783  | 3.296872  | -0.659156 |
| 52 | 1  | -4.255861 | 3.206317  | -0.343447 |
| 53 | 1  | -3.207831 | -4.254721 | -0.327569 |
| 54 | 1  | 4.270317  | -3.192584 | -0.324017 |
| 55 | 1  | 3.198519  | 4.258425  | -0.352300 |
| 56 | 6  | 3.919343  | 2.929258  | -1.710631 |
| 57 | 1  | 3.386424  | 2.671859  | -2.631512 |
| 58 | 6  | -2.940002 | 3.902831  | -1.727384 |
| 59 | 1  | -2.698115 | 3.358770  | -2.645912 |
| 60 | 6  | -3.932323 | -2.934507 | -1.691469 |
| 61 | 1  | -4.531614 | -2.066799 | -1.397119 |
| 62 | 6  | 2.960224  | -3.893070 | -1.710395 |
| 63 | 1  | 2.724701  | -3.352496 | -2.632683 |
| 64 | 1  | -2.064321 | 4.497551  | -1.447475 |
| 65 | 1  | 4.517665  | 2.061657  | -1.413739 |
| 66 | 1  | 2.082390  | -4.485335 | -1.432445 |
| 67 | 1  | -3.402415 | -2.681058 | -2.615196 |
| 68 | 6  | 4.196034  | -4.825112 | -1.920740 |
| 69 | 8  | 5.179058  | -4.591536 | -1.151773 |
| 70 | 8  | 4.078608  | -5.691830 | -2.815287 |
| 71 | 6  | 4.843834  | 4.167057  | -1.940278 |
| 72 | 8  | 4.598123  | 5.165276  | -1.195153 |
| 73 | 8  | 5.718745  | 4.036623  | -2.825472 |
| 74 | 6  | -4.174185 | 4.833787  | -1.950147 |
| 75 | 8  | -5.162578 | 4.605493  | -1.186565 |
| 76 | 8  | -4.050995 | 5.695900  | -2.848778 |
| 77 | 6  | -4.853541 | -4.176967 | -1.910248 |
| 78 | 8  | -4.602787 | -5.168050 | -1.157154 |
| 79 | 8  | -5.729920 | -4.056329 | -2.794941 |
| 80 | 6  | -4.439642 | 1.535409  | 1.522383  |
| 81 | 1  | -4.279274 | 2.505741  | 1.999289  |
| 82 | 1  | -5.259535 | 1.636931  | 0.806141  |
| 83 | 1  | -4.771132 | 0.824823  | 2.283565  |
| 84 | 6  | -1.509360 | -4.433148 | 1.516917  |
| 85 | 1  | -1.615571 | -5.248404 | 0.796144  |
| 86 | 1  | -0.785425 | -4.765242 | 2.264965  |
| 87 | 1  | -2.473533 | -4.282738 | 2.009161  |
| 88 | 6  | 4.441800  | -1.509317 | 1.536715  |
| 89 | 1  | 4.283448  | -2.477819 | 2.017931  |
| 90 | 1  | 5.263805  | -1.611179 | 0.822999  |
| 91 | 1  | 4.768818  | -0.793957 | 2.295236  |
| 92 | 6  | 1.516821  | 4.448513  | 1.503628  |
| 93 | 1  | 2.482453  | 4.294965  | 1.992107  |
| 94 | 1  | 1.623876  | 5.261724  | 0.780618  |
| 95 | 1  | 0.797485  | 4.785621  | 2.254021  |
| 96 | 66 | -0.000247 | 0.013594  | 0.132652  |

-----  
E(RTPSSh) = -2548.3611382 Hartree

Zero-point correction = 0.782441 Hartree/particle

Sum of electronic and thermal Energies = -2547.525645 Hartree

Sum of electronic and thermal Enthalpies = -2547.524701 Hartree

Sum of electronic and thermal Free Energies = -2547.668697 Hartree

**Table S42.** [Ho(DOTMA-(gly)<sub>4</sub>(H<sub>2</sub>O)]<sup>-</sup> [SAP, Δ(λλλλ)], TPSSh/LCRECP/6-31G(d,p), aqueous solution (0 Imaginary Frequencies)

| Center Number | Atomic Number | Coordinates (Angstroms) |           |           |
|---------------|---------------|-------------------------|-----------|-----------|
|               |               | X                       | Y         | Z         |
| 1             | 7             | 0.421790                | 2.110654  | 1.692702  |
| 2             | 6             | 1.375666                | 1.741808  | 2.779863  |
| 3             | 6             | 2.542771                | 0.871355  | 2.324214  |
| 4             | 7             | 2.102852                | -0.416340 | 1.703914  |
| 5             | 6             | 1.726988                | -1.374594 | 2.784137  |
| 6             | 6             | 0.859137                | -2.537764 | 2.314139  |
| 7             | 7             | -0.427226               | -2.091688 | 1.695188  |
| 8             | 6             | -1.383384               | -1.721248 | 2.780102  |
| 9             | 6             | -2.549330               | -0.851802 | 2.319968  |
| 10            | 7             | -2.106891               | 0.433752  | 1.697875  |
| 11            | 6             | -1.734504               | 1.394857  | 2.777210  |
| 12            | 6             | -0.865826               | 2.557905  | 2.307636  |
| 13            | 6             | 0.942275                | 3.201017  | 0.798006  |
| 14            | 6             | 1.920840                | 2.594522  | -0.208255 |
| 15            | 8             | 1.717957                | 1.411996  | -0.626381 |
| 16            | 6             | 3.204236                | -0.931576 | 0.820116  |
| 17            | 6             | 2.615701                | -1.901533 | -0.202606 |
| 18            | 8             | 1.441026                | -1.687463 | -0.645523 |
| 19            | 6             | -0.944726               | -3.187273 | 0.805052  |
| 20            | 6             | -1.928088               | -2.592505 | -0.201951 |
| 21            | 8             | -1.724206               | -1.412479 | -0.632940 |
| 22            | 6             | -3.203355               | 0.948269  | 0.807592  |
| 23            | 6             | -2.603098               | 1.913550  | -0.214023 |
| 24            | 8             | -1.428344               | 1.695909  | -0.647587 |
| 25            | 1             | 0.800717                | 1.216138  | 3.545226  |
| 26            | 1             | 1.778884                | 2.636876  | 3.268840  |
| 27            | 1             | 3.155888                | 1.403222  | 1.594711  |
| 28            | 1             | 3.180401                | 0.686766  | 3.198946  |
| 29            | 1             | 1.196397                | -0.803551 | 3.549071  |
| 30            | 1             | 2.617971                | -1.781508 | 3.277415  |
| 31            | 1             | 1.393028                | -3.143279 | 1.579541  |
| 32            | 1             | 0.672112                | -3.184703 | 3.181402  |
| 33            | 1             | -0.809914               | -1.193671 | 3.545229  |
| 34            | 1             | -1.786965               | -2.615524 | 3.270139  |
| 35            | 1             | -3.161088               | -1.385081 | 1.590297  |
| 36            | 1             | -3.189236               | -0.665010 | 3.192587  |
| 37            | 1             | -1.205672               | 0.825606  | 3.544727  |
| 38            | 1             | -2.627373               | 1.801817  | 3.267019  |
| 39            | 1             | -1.398138               | 3.161807  | 1.570599  |
| 40            | 1             | -0.681042               | 3.206382  | 3.174269  |
| 41            | 1             | 0.079711                | 3.472544  | 0.178235  |
| 42            | 1             | 3.481854                | -0.065506 | 0.208124  |
| 43            | 1             | -0.082400               | -3.455663 | 0.183370  |
| 44            | 1             | -3.482221               | 0.080820  | 0.198282  |
| 45            | 8             | -0.015933               | -0.160315 | -2.329951 |
| 46            | 1             | 0.673897                | -0.829773 | -2.485785 |
| 47            | 1             | -0.854432               | -0.619176 | -2.512466 |
| 48            | 7             | -3.340897               | 2.906284  | -0.668258 |
| 49            | 7             | -2.919042               | -3.335174 | -0.648904 |
| 50            | 7             | 3.357376                | -2.891089 | -0.652979 |
| 51            | 7             | 2.910637                | 3.335551  | -0.664270 |
| 52            | 1             | -4.302555               | 3.119840  | -0.357702 |
| 53            | 1             | -3.121923               | -4.301654 | -0.343795 |
| 54            | 1             | 4.318389                | -3.105033 | -0.338025 |

|    |    |           |           |           |
|----|----|-----------|-----------|-----------|
| 55 | 1  | 3.111898  | 4.303617  | -0.365929 |
| 56 | 6  | 3.849447  | 2.979813  | -1.720532 |
| 57 | 1  | 3.314793  | 2.704100  | -2.635072 |
| 58 | 6  | -2.990896 | 3.832927  | -1.737152 |
| 59 | 1  | -2.732328 | 3.288055  | -2.650632 |
| 60 | 6  | -3.860600 | -2.987173 | -1.705591 |
| 61 | 1  | -4.478553 | -2.132677 | -1.411256 |
| 62 | 6  | 3.014271  | -3.819553 | -1.722858 |
| 63 | 1  | 2.763461  | -3.275923 | -2.639321 |
| 64 | 1  | -2.128787 | 4.446203  | -1.455186 |
| 65 | 1  | 4.468474  | 2.127419  | -1.422059 |
| 66 | 1  | 2.149527  | -4.430992 | -1.445451 |
| 67 | 1  | -3.328229 | -2.718455 | -2.623579 |
| 68 | 6  | 4.266658  | -4.725720 | -1.947642 |
| 69 | 8  | 5.249291  | -4.479434 | -1.182173 |
| 70 | 8  | 4.160826  | -5.587107 | -2.848735 |
| 71 | 6  | 4.745735  | 4.234957  | -1.966970 |
| 72 | 8  | 4.485397  | 5.233261  | -1.226976 |
| 73 | 8  | 5.615508  | 4.116250  | -2.858838 |
| 74 | 6  | -4.241103 | 4.738633  | -1.973960 |
| 75 | 8  | -5.230144 | 4.495971  | -1.215696 |
| 76 | 8  | -4.128129 | 5.597417  | -2.877096 |
| 77 | 6  | -4.756418 | -4.245467 | -1.938838 |
| 78 | 8  | -4.492687 | -5.236169 | -1.189710 |
| 79 | 8  | -5.628011 | -4.135934 | -2.829649 |
| 80 | 6  | -4.461606 | 1.458621  | 1.523418  |
| 81 | 1  | -4.318174 | 2.433685  | 1.996052  |
| 82 | 1  | -5.281959 | 1.543110  | 0.805515  |
| 83 | 1  | -4.782449 | 0.746085  | 2.287389  |
| 84 | 6  | -1.437026 | -4.453003 | 1.520251  |
| 85 | 1  | -1.526717 | -5.269615 | 0.798795  |
| 86 | 1  | -0.711978 | -4.774096 | 2.272056  |
| 87 | 1  | -2.405996 | -4.317670 | 2.007408  |
| 88 | 6  | 4.461458  | -1.435327 | 1.542331  |
| 89 | 1  | 4.319200  | -2.408948 | 2.018213  |
| 90 | 1  | 5.284798  | -1.519653 | 0.827886  |
| 91 | 1  | 4.776939  | -0.718818 | 2.304691  |
| 92 | 6  | 1.442797  | 4.466072  | 1.508831  |
| 93 | 1  | 2.412963  | 4.327811  | 1.992863  |
| 94 | 1  | 1.533634  | 5.280785  | 0.785325  |
| 95 | 1  | 0.721669  | 4.791993  | 2.262485  |
| 96 | 67 | -0.000406 | 0.013639  | 0.148922  |

E(RTPSSh) = -2548.9451695 Hartree

Zero-point correction = 0.781951 Hartree/particle

Sum of electronic and thermal Energies = -2548.110041 Hartree

Sum of electronic and thermal Enthalpies = -2548.109097 Hartree

Sum of electronic and thermal Free Energies = -2548.253789 Hartree

**Table S43.** [Tm(DOTMA-(gly)<sub>4</sub>(H<sub>2</sub>O)]<sup>-</sup> [SAP, Δ(λλλ)], TPSSh/LCRECP/6-31G(d,p), aqueous solution (0 Imaginary Frequencies)

| Center Number | Atomic Number | Coordinates (Angstroms) |           |          |
|---------------|---------------|-------------------------|-----------|----------|
|               |               | X                       | Y         | Z        |
| 1             | 7             | 0.383432                | 2.101856  | 1.701972 |
| 2             | 6             | 1.340905                | 1.758366  | 2.791895 |
| 3             | 6             | 2.521585                | 0.909481  | 2.335410 |
| 4             | 7             | 2.093047                | -0.381066 | 1.715770 |
| 5             | 6             | 1.738860                | -1.341074 | 2.799144 |
| 6             | 6             | 0.895140                | -2.518772 | 2.326594 |



|    |   |           |           |           |
|----|---|-----------|-----------|-----------|
| 7  | 7 | -0.393215 | -2.085368 | 1.705931  |
| 8  | 6 | -1.354455 | -1.738754 | 2.791705  |
| 9  | 6 | -2.533386 | -0.892087 | 2.327406  |
| 10 | 7 | -2.101958 | 0.395973  | 1.705938  |
| 11 | 6 | -1.752984 | 1.359987  | 2.787933  |
| 12 | 6 | -0.907260 | 2.537061  | 2.316262  |
| 13 | 6 | 0.889317  | 3.194254  | 0.799270  |
| 14 | 6 | 1.874607  | 2.595128  | -0.204811 |
| 15 | 8 | 1.691347  | 1.403646  | -0.607851 |
| 16 | 6 | 3.197989  | -0.884142 | 0.827773  |
| 17 | 6 | 2.618297  | -1.855947 | -0.198035 |
| 18 | 8 | 1.435918  | -1.657305 | -0.630602 |
| 19 | 6 | -0.895144 | -3.184302 | 0.809298  |
| 20 | 6 | -1.880084 | -2.598389 | -0.200955 |
| 21 | 8 | -1.689832 | -1.411494 | -0.622055 |
| 22 | 6 | -3.200664 | 0.897165  | 0.809013  |
| 23 | 6 | -2.606903 | 1.865896  | -0.213010 |
| 24 | 8 | -1.424507 | 1.662982  | -0.634702 |
| 25 | 1 | 0.777047  | 1.224263  | 3.560191  |
| 26 | 1 | 1.725628  | 2.663244  | 3.278333  |
| 27 | 1 | 3.123976  | 1.453012  | 1.605271  |
| 28 | 1 | 3.164399  | 0.731653  | 3.207929  |
| 29 | 1 | 1.196550  | -0.779924 | 3.563699  |
| 30 | 1 | 2.637870  | -1.728279 | 3.294357  |
| 31 | 1 | 1.442852  | -3.112362 | 1.592026  |
| 32 | 1 | 0.714350  | -3.171780 | 3.190810  |
| 33 | 1 | -0.793438 | -1.201523 | 3.559839  |
| 34 | 1 | -1.740121 | -2.642097 | 3.280176  |
| 35 | 1 | -3.132260 | -1.437908 | 1.595923  |
| 36 | 1 | -3.180926 | -0.712044 | 3.195988  |
| 37 | 1 | -1.213818 | 0.801365  | 3.556564  |
| 38 | 1 | -2.654684 | 1.747846  | 3.277704  |
| 39 | 1 | -1.452000 | 3.128862  | 1.578104  |
| 40 | 1 | -0.729788 | 3.191842  | 3.179840  |
| 41 | 1 | 0.021684  | 3.451572  | 0.180302  |
| 42 | 1 | 3.467584  | -0.012906 | 0.219346  |
| 43 | 1 | -0.026388 | -3.442040 | 0.191847  |
| 44 | 1 | -3.469109 | 0.024505  | 0.202254  |
| 45 | 8 | -0.012831 | -0.142773 | -2.312619 |
| 46 | 1 | 0.675638  | -0.812481 | -2.473194 |
| 47 | 1 | -0.852216 | -0.596949 | -2.502269 |
| 48 | 7 | -3.354966 | 2.844888  | -0.676678 |
| 49 | 7 | -2.855822 | -3.352069 | -0.658834 |
| 50 | 7 | 3.372268  | -2.829041 | -0.659791 |
| 51 | 7 | 2.848846  | 3.348441  | -0.670778 |
| 52 | 1 | -4.327709 | 3.054311  | -0.383617 |
| 53 | 1 | -3.056617 | -4.328751 | -0.369290 |
| 54 | 1 | 4.344839  | -3.038464 | -0.362182 |
| 55 | 1 | 3.043462  | 4.327841  | -0.390570 |
| 56 | 6 | 3.794091  | 3.006056  | -1.726173 |
| 57 | 1 | 3.265924  | 2.711339  | -2.638476 |
| 58 | 6 | -3.017624 | 3.775546  | -1.746668 |
| 59 | 1 | -2.742683 | 3.234799  | -2.657765 |
| 60 | 6 | -3.797702 | -3.019277 | -1.720693 |
| 61 | 1 | -4.435864 | -2.178949 | -1.428634 |
| 62 | 6 | 3.045375  | -3.758025 | -1.734845 |
| 63 | 1 | 2.779337  | -3.215620 | -2.647751 |
| 64 | 1 | -2.171356 | 4.409363  | -1.461998 |
| 65 | 1 | 4.435031  | 2.171734  | -1.422659 |
| 66 | 1 | 2.197135  | -4.392727 | -1.458671 |
| 67 | 1 | -3.266582 | -2.738757 | -2.635881 |
| 68 | 6 | 4.326822  | -4.628790 | -1.961464 |

|    |    |           |           |           |
|----|----|-----------|-----------|-----------|
| 69 | 8  | 5.296083  | -4.349828 | -1.188350 |
| 70 | 8  | 4.248899  | -5.487983 | -2.864338 |
| 71 | 6  | 4.655916  | 4.289046  | -1.974956 |
| 72 | 8  | 4.362522  | 5.274779  | -1.228699 |
| 73 | 8  | 5.525154  | 4.196593  | -2.867448 |
| 74 | 6  | -4.294395 | 4.649503  | -1.984689 |
| 75 | 8  | -5.272209 | 4.374025  | -1.221304 |
| 76 | 8  | -4.205641 | 5.509213  | -2.886650 |
| 77 | 6  | -4.662117 | -4.303975 | -1.953362 |
| 78 | 8  | -4.369907 | -5.279732 | -1.193408 |
| 79 | 8  | -5.530296 | -4.221879 | -2.847272 |
| 80 | 6  | -4.465475 | 1.399995  | 1.518594  |
| 81 | 1  | -4.330710 | 2.378775  | 1.986454  |
| 82 | 1  | -5.283051 | 1.476348  | 0.796565  |
| 83 | 1  | -4.784847 | 0.688994  | 2.284808  |
| 84 | 6  | -1.380106 | -4.456675 | 1.517894  |
| 85 | 1  | -1.457973 | -5.271196 | 0.792625  |
| 86 | 1  | -0.658250 | -4.774347 | 2.274399  |
| 87 | 1  | -2.354544 | -4.331556 | 1.997269  |
| 88 | 6  | 4.459360  | -1.382604 | 1.546563  |
| 89 | 1  | 4.323679  | -2.360479 | 2.016001  |
| 90 | 1  | 5.281923  | -1.458581 | 0.830248  |
| 91 | 1  | 4.771802  | -0.668898 | 2.312992  |
| 92 | 6  | 1.377861  | 4.468285  | 1.502374  |
| 93 | 1  | 2.351902  | 4.342556  | 1.982448  |
| 94 | 1  | 1.458338  | 5.279508  | 0.773663  |
| 95 | 1  | 0.656690  | 4.791374  | 2.257406  |
| 96 | 69 | -0.000706 | 0.014471  | 0.141891  |

E(RTPSSh) = -2550.0860564 Hartree

Zero-point correction = 0.782014 Hartree/particle

Sum of electronic and thermal Energies = -2549.251264 Hartree

Sum of electronic and thermal Enthalpies = -2549.250319 Hartree

Sum of electronic and thermal Free Energies = -2549.393187 Hartree

**Table S44.** [Yb(DOTMA-(gly)<sub>4</sub>(H<sub>2</sub>O)]<sup>-</sup> [SAP, Δ(λλλλ)], TPSSh/LCRECP/6-31G(d,p), aqueous solution (0 Imaginary Frequencies)

| Center Number | Atomic Number | Coordinates (Angstroms) |           |           |
|---------------|---------------|-------------------------|-----------|-----------|
|               |               | X                       | Y         | Z         |
| 1             | 7             | 0.310352                | 2.109248  | 1.709231  |
| 2             | 6             | 1.278930                | 1.802774  | 2.800005  |
| 3             | 6             | 2.487343                | 0.994346  | 2.342759  |
| 4             | 7             | 2.100283                | -0.310045 | 1.724941  |
| 5             | 6             | 1.782151                | -1.281163 | 2.808957  |
| 6             | 6             | 0.979196                | -2.486204 | 2.334464  |
| 7             | 7             | -0.322258               | -2.093791 | 1.713986  |
| 8             | 6             | -1.295594               | -1.784049 | 2.799612  |
| 9             | 6             | -2.501781               | -0.978059 | 2.333089  |
| 10            | 7             | -2.111106               | 0.323563  | 1.713029  |
| 11            | 6             | -1.799536               | 1.299188  | 2.795462  |
| 12            | 6             | -0.994047               | 2.503548  | 2.322206  |
| 13            | 6             | 0.780058                | 3.215189  | 0.803083  |
| 14            | 6             | 1.780592                | 2.644112  | -0.201808 |
| 15            | 8             | 1.637481                | 1.444052  | -0.595416 |
| 16            | 6             | 3.218931                | -0.776907 | 0.834217  |
| 17            | 6             | 2.667165                | -1.762579 | -0.193419 |
| 18            | 8             | 1.476052                | -1.602611 | -0.618134 |
| 19            | 6             | -0.786822               | -3.206248 | 0.813730  |
| 20            | 6             | -1.785830               | -2.648890 | -0.198454 |

|    |   |           |           |           |
|----|---|-----------|-----------|-----------|
| 21 | 8 | -1.635344 | -1.453168 | -0.610683 |
| 22 | 6 | -3.222828 | 0.788118  | 0.812145  |
| 23 | 6 | -2.656342 | 1.772331  | -0.210107 |
| 24 | 8 | -1.464971 | 1.608494  | -0.623481 |
| 25 | 1 | 0.734936  | 1.250608  | 3.569737  |
| 26 | 1 | 1.631688  | 2.721885  | 3.283811  |
| 27 | 1 | 3.069122  | 1.557528  | 1.610582  |
| 28 | 1 | 3.138029  | 0.838894  | 3.213676  |
| 29 | 1 | 1.221050  | -0.740160 | 3.574344  |
| 30 | 1 | 2.694905  | -1.636764 | 3.302555  |
| 31 | 1 | 1.547178  | -3.059015 | 1.598545  |
| 32 | 1 | 0.819894  | -3.147313 | 3.196727  |
| 33 | 1 | -0.755372 | -1.228336 | 3.569382  |
| 34 | 1 | -1.649642 | -2.701471 | 3.285628  |
| 35 | 1 | -3.079393 | -1.543768 | 1.599391  |
| 36 | 1 | -3.157941 | -0.820000 | 3.199437  |
| 37 | 1 | -1.242477 | 0.761015  | 3.565804  |
| 38 | 1 | -2.715545 | 1.655552  | 3.282439  |
| 39 | 1 | -1.558320 | 3.074514  | 1.582091  |
| 40 | 1 | -0.838749 | 3.166463  | 3.183814  |
| 41 | 1 | -0.096334 | 3.444842  | 0.185499  |
| 42 | 1 | 3.461703  | 0.103381  | 0.227436  |
| 43 | 1 | 0.091298  | -3.436168 | 0.198396  |
| 44 | 1 | -3.462627 | -0.093537 | 0.206264  |
| 45 | 8 | -0.008396 | -0.131958 | -2.294471 |
| 46 | 1 | 0.697302  | -0.783595 | -2.454574 |
| 47 | 1 | -0.835457 | -0.608268 | -2.483860 |
| 48 | 7 | -3.434083 | 2.723385  | -0.683025 |
| 49 | 7 | -2.731891 | -3.433058 | -0.667239 |
| 50 | 7 | 3.451127  | -2.706644 | -0.665317 |
| 51 | 7 | 2.725806  | 3.427304  | -0.678204 |
| 52 | 1 | -4.415389 | 2.901058  | -0.397435 |
| 53 | 1 | -2.899827 | -4.418327 | -0.385735 |
| 54 | 1 | 4.432249  | -2.884359 | -0.374949 |
| 55 | 1 | 2.887424  | 4.415129  | -0.406590 |
| 56 | 6 | 3.679017  | 3.109547  | -1.734236 |
| 57 | 1 | 3.158733  | 2.790228  | -2.642756 |
| 58 | 6 | -3.121201 | 3.661576  | -1.753974 |
| 59 | 1 | -2.822888 | 3.127752  | -2.661766 |
| 60 | 6 | -3.680222 | -3.126090 | -1.731246 |
| 61 | 1 | -4.348448 | -2.310462 | -1.436404 |
| 62 | 6 | 3.149648  | -3.641459 | -1.742864 |
| 63 | 1 | 2.860031  | -3.104643 | -2.651878 |
| 64 | 1 | -2.298386 | 4.324157  | -1.466053 |
| 65 | 1 | 4.349033  | 2.300026  | -1.426394 |
| 66 | 1 | 2.325291  | -4.306053 | -1.464621 |
| 67 | 1 | -3.155528 | -2.821400 | -2.642403 |
| 68 | 6 | 4.458569  | -4.467321 | -1.980546 |
| 69 | 8 | 5.422177  | -4.159029 | -1.211521 |
| 70 | 8 | 4.404191  | -5.324844 | -2.886664 |
| 71 | 6 | 4.496080  | 4.419205  | -1.994961 |
| 72 | 8 | 4.170300  | 5.400430  | -1.256269 |
| 73 | 8 | 5.366614  | 4.348735  | -2.888142 |
| 74 | 6 | -4.424700 | 4.492213  | -2.002188 |
| 75 | 8 | -5.397434 | 4.186919  | -1.243686 |
| 76 | 8 | -4.358501 | 5.351751  | -2.906192 |
| 77 | 6 | -4.498886 | -4.438332 | -1.975690 |
| 78 | 8 | -4.175801 | -5.408482 | -1.221095 |
| 79 | 8 | -5.366156 | -4.379839 | -2.872268 |
| 80 | 6 | -4.503928 | 1.254710  | 1.517226  |
| 81 | 1 | -4.399587 | 2.239208  | 1.980910  |
| 82 | 1 | -5.322019 | 1.302961  | 0.793398  |

|    |    |           |           |          |
|----|----|-----------|-----------|----------|
| 83 | 1  | -4.802713 | 0.537490  | 2.285932 |
| 84 | 6  | -1.236672 | -4.493558 | 1.518472 |
| 85 | 1  | -1.285198 | -5.309551 | 0.792339 |
| 86 | 1  | -0.510123 | -4.789351 | 2.279334 |
| 87 | 1  | -2.217530 | -4.398052 | 1.991589 |
| 88 | 6  | 4.495176  | -1.240776 | 1.549898 |
| 89 | 1  | 4.388376  | -2.224430 | 2.014777 |
| 90 | 1  | 5.319092  | -1.289169 | 0.832780 |
| 91 | 1  | 4.786669  | -0.521464 | 2.319334 |
| 92 | 6  | 1.233076  | 4.504248  | 1.502533 |
| 93 | 1  | 2.213353  | 4.408158  | 1.976773 |
| 94 | 1  | 1.284544  | 5.316967  | 0.772911 |
| 95 | 1  | 0.506713  | 4.805540  | 2.261580 |
| 96 | 70 | -0.001338 | 0.014745  | 0.154291 |

E(RTPSSh) = -2550.6693165 Hartree

Zero-point correction = 0.782274 Hartree/particle

Sum of electronic and thermal Energies = -2549.834377 Hartree

Sum of electronic and thermal Enthalpies = -2549.833433 Hartree

Sum of electronic and thermal Free Energies = -2549.975698 Hartree

**Table S45.** [Lu(DOTMA-(gly)<sub>4</sub>(H<sub>2</sub>O))<sup>-</sup>] [SAP, Δ(λλλλ)], TPSSh/LCRECP/6-31G(d,p), aqueous solution (0 Imaginary Frequencies)

| Center<br>Number | Atomic<br>Number | Coordinates (Angstroms) |           |           |
|------------------|------------------|-------------------------|-----------|-----------|
|                  |                  | X                       | Y         | Z         |
| 1                | 7                | 0.265920                | 2.111109  | 1.710223  |
| 2                | 6                | 1.241176                | 1.828352  | 2.801408  |
| 3                | 6                | 2.465826                | 1.045614  | 2.343312  |
| 4                | 7                | 2.103239                | -0.266204 | 1.726348  |
| 5                | 6                | 1.808622                | -1.243671 | 2.810976  |
| 6                | 6                | 1.031694                | -2.464821 | 2.335030  |
| 7                | 7                | -0.277067               | -2.096775 | 1.714947  |
| 8                | 6                | -1.256672               | -1.811011 | 2.801296  |
| 9                | 6                | -2.479325               | -1.031184 | 2.334020  |
| 10               | 7                | -2.113628               | 0.278055  | 1.714765  |
| 11               | 6                | -1.825277               | 1.259956  | 2.797749  |
| 12               | 6                | -1.045782               | 2.480623  | 2.323229  |
| 13               | 6                | 0.713315                | 3.224428  | 0.801581  |
| 14               | 6                | 1.723204                | 2.669767  | -0.202829 |
| 15               | 8                | 1.604319                | 1.464964  | -0.589882 |
| 16               | 6                | 3.228692                | -0.711387 | 0.833043  |
| 17               | 6                | 2.692119                | -1.705210 | -0.194533 |
| 18               | 8                | 1.496437                | -1.567057 | -0.614260 |
| 19               | 6                | -0.719483               | -3.216141 | 0.812056  |
| 20               | 6                | -1.726578               | -2.674788 | -0.200489 |
| 21               | 8                | -1.598328               | -1.474633 | -0.607620 |
| 22               | 6                | -3.233009               | 0.720600  | 0.812240  |
| 23               | 6                | -2.682898               | 1.713823  | -0.209835 |
| 24               | 8                | -1.486783               | 1.573098  | -0.617841 |
| 25               | 1                | 0.710515                | 1.265155  | 3.572420  |
| 26               | 1                | 1.573488                | 2.756011  | 3.283259  |
| 27               | 1                | 3.035004                | 1.620547  | 1.610196  |
| 28               | 1                | 3.120936                | 0.903217  | 3.213098  |
| 29               | 1                | 1.236022                | -0.716145 | 3.577211  |
| 30               | 1                | 2.729776                | -1.578832 | 3.303182  |
| 31               | 1                | 1.611748                | -3.024466 | 1.598202  |
| 32               | 1                | 0.885400                | -3.130820 | 3.195790  |
| 33               | 1                | -0.729824               | -1.243857 | 3.571944  |
| 34               | 1                | -1.589837               | -2.736965 | 3.285805  |

|    |    |           |           |           |
|----|----|-----------|-----------|-----------|
| 35 | 1  | -3.043994 | -1.608841 | 1.599344  |
| 36 | 1  | -3.140052 | -0.886601 | 3.199204  |
| 37 | 1  | -1.256676 | 0.735113  | 3.568817  |
| 38 | 1  | -2.749538 | 1.595850  | 3.283592  |
| 39 | 1  | -1.622155 | 3.038893  | 1.582590  |
| 40 | 1  | -0.903316 | 3.147917  | 3.183625  |
| 41 | 1  | -0.167768 | 3.436537  | 0.184510  |
| 42 | 1  | 3.454697  | 0.173662  | 0.226835  |
| 43 | 1  | 0.163430  | -3.428996 | 0.197544  |
| 44 | 1  | -3.455892 | -0.165738 | 0.206855  |
| 45 | 8  | -0.006084 | -0.117865 | -2.283816 |
| 46 | 1  | 0.712302  | -0.755095 | -2.445189 |
| 47 | 1  | -0.823863 | -0.610999 | -2.470543 |
| 48 | 7  | -3.477443 | 2.648281  | -0.687778 |
| 49 | 7  | -2.656397 | -3.474988 | -0.674389 |
| 50 | 7  | 3.491615  | -2.633710 | -0.671087 |
| 51 | 7  | 2.651405  | 3.469631  | -0.684847 |
| 52 | 1  | -4.462813 | 2.808035  | -0.405421 |
| 53 | 1  | -2.807406 | -4.463880 | -0.395662 |
| 54 | 1  | 4.476582  | -2.794716 | -0.383726 |
| 55 | 1  | 2.794549  | 4.461454  | -0.417304 |
| 56 | 6  | 3.612228  | 3.164978  | -1.737866 |
| 57 | 1  | 3.099583  | 2.835580  | -2.647163 |
| 58 | 6  | -3.178258 | 3.593079  | -1.756860 |
| 59 | 1  | -2.870494 | 3.065687  | -2.665284 |
| 60 | 6  | -3.611141 | -3.181413 | -1.736481 |
| 61 | 1  | -4.290919 | -2.376085 | -1.439809 |
| 62 | 6  | 3.202814  | -3.574817 | -1.746675 |
| 63 | 1  | 2.903658  | -3.044198 | -2.656255 |
| 64 | 1  | -2.366495 | 4.268264  | -1.466909 |
| 65 | 1  | 4.294310  | 2.366953  | -1.426590 |
| 66 | 1  | 2.389281  | -4.251613 | -1.466031 |
| 67 | 1  | -3.092867 | -2.868467 | -2.648540 |
| 68 | 6  | 4.523958  | -4.380805 | -1.985109 |
| 69 | 8  | 5.484612  | -4.054601 | -1.219790 |
| 70 | 8  | 4.480497  | -5.242074 | -2.888206 |
| 71 | 6  | 4.408799  | 4.487037  | -1.999487 |
| 72 | 8  | 4.063192  | 5.465366  | -1.265999 |
| 73 | 8  | 5.284574  | 4.427557  | -2.888293 |
| 74 | 6  | -4.494591 | 4.403152  | -2.005423 |
| 75 | 8  | -5.463747 | 4.079866  | -1.249803 |
| 76 | 8  | -4.440352 | 5.266065  | -2.906962 |
| 77 | 6  | -4.410491 | -4.505633 | -1.980410 |
| 78 | 8  | -4.069717 | -5.472021 | -1.228776 |
| 79 | 8  | -5.281672 | -4.458652 | -2.873805 |
| 80 | 6  | -4.522937 | 1.165393  | 1.515090  |
| 81 | 1  | -4.436736 | 2.152956  | 1.975960  |
| 82 | 1  | -5.341106 | 1.196810  | 0.790435  |
| 83 | 1  | -4.809130 | 0.444918  | 2.285530  |
| 84 | 6  | -1.148034 | -4.512271 | 1.513612  |
| 85 | 1  | -1.179630 | -5.327965 | 0.786216  |
| 86 | 1  | -0.418644 | -4.795816 | 2.276413  |
| 87 | 1  | -2.131988 | -4.434904 | 1.983575  |
| 88 | 6  | 4.513922  | -1.154456 | 1.545583  |
| 89 | 1  | 4.424937  | -2.141137 | 2.007805  |
| 90 | 1  | 5.337428  | -1.186499 | 0.827079  |
| 91 | 1  | 4.793722  | -0.432143 | 2.316545  |
| 92 | 6  | 1.144127  | 4.522528  | 1.498060  |
| 93 | 1  | 2.127548  | 4.445087  | 1.969161  |
| 94 | 1  | 1.178269  | 5.335056  | 0.767218  |
| 95 | 1  | 0.414610  | 4.811140  | 2.258995  |
| 96 | 71 | -0.001153 | 0.015517  | 0.159928  |

-----  
E(RTPSSh) = -2551.223034 Hartree  
Zero-point correction = 0.782361 Hartree/particle  
Sum of electronic and thermal Energies = -2550.388051 Hartree  
Sum of electronic and thermal Enthalpies = -2550.387107 Hartree  
Sum of electronic and thermal Free Energies = -2550.529304 Hartree  
-----

**Table S46.** [La(DOTMA-(gly)<sub>4</sub>(H<sub>2</sub>O)]<sup>-</sup> [TSAP, Δ(δδδδ)], TPSSh/LCRECP/6-31G(d,p), aqueous solution (0 Imaginary Frequencies)

| Center Number | Atomic Number | Coordinates (Angstroms) |           |           |
|---------------|---------------|-------------------------|-----------|-----------|
|               |               | X                       | Y         | Z         |
| 1             | 7             | -1.103298               | -1.857872 | 1.884380  |
| 2             | 6             | -0.127138               | -2.196801 | 2.956747  |
| 3             | 6             | 1.313925                | -2.340860 | 2.473001  |
| 4             | 7             | 1.873925                | -1.085634 | 1.886295  |
| 5             | 6             | 2.197301                | -0.113317 | 2.967407  |
| 6             | 6             | 2.345072                | 1.330112  | 2.491723  |
| 7             | 7             | 1.096238                | 1.887350  | 1.889247  |
| 8             | 6             | 0.120365                | 2.228950  | 2.960362  |
| 9             | 6             | -1.320790               | 2.368936  | 2.475952  |
| 10            | 7             | -1.874430               | 1.112895  | 1.884955  |
| 11            | 6             | -2.207476               | 0.142304  | 2.963357  |
| 12            | 6             | -2.353231               | -1.300742 | 2.486272  |
| 13            | 6             | -1.431119               | -3.044119 | 1.021245  |
| 14            | 6             | -2.223798               | -2.517906 | -0.186976 |
| 15            | 8             | -1.951239               | -1.363779 | -0.650500 |
| 16            | 6             | 3.073631                | -1.402740 | 1.038395  |
| 17            | 6             | 2.572778                | -2.167813 | -0.197150 |
| 18            | 8             | 1.425283                | -1.890148 | -0.676016 |
| 19            | 6             | 1.422990                | 3.067994  | 1.019597  |
| 20            | 6             | 2.207222                | 2.531363  | -0.190916 |
| 21            | 8             | 1.945952                | 1.368197  | -0.633479 |
| 22            | 6             | -3.061105               | 1.428513  | 1.019263  |
| 23            | 6             | -2.535429               | 2.199062  | -0.204362 |
| 24            | 8             | -1.376593               | 1.931760  | -0.656078 |
| 25            | 1             | -0.188900               | -1.409783 | 3.711264  |
| 26            | 1             | -0.406257               | -3.123092 | 3.473752  |
| 27            | 1             | 1.375516                | -3.123082 | 1.711233  |
| 28            | 1             | 1.920137                | -2.677204 | 3.324562  |
| 29            | 1             | 1.400661                | -0.177714 | 3.711515  |
| 30            | 1             | 3.117134                | -0.393767 | 3.495327  |
| 31            | 1             | 3.139169                | 1.397220  | 1.743289  |
| 32            | 1             | 2.666305                | 1.933915  | 3.350875  |
| 33            | 1             | 0.182617                | 1.444402  | 3.717587  |
| 34            | 1             | 0.398149                | 3.157635  | 3.474249  |
| 35            | 1             | -1.384627               | 3.153471  | 1.717006  |
| 36            | 1             | -1.929525               | 2.699998  | 3.327864  |
| 37            | 1             | -1.416556               | 0.206533  | 3.713718  |
| 38            | 1             | -3.131528               | 0.422989  | 3.484083  |
| 39            | 1             | -3.146146               | -1.367481 | 1.736396  |
| 40            | 1             | -2.675228               | -1.905921 | 3.344037  |
| 41            | 1             | -0.476275               | -3.390103 | 0.604896  |
| 42            | 1             | 3.429408                | -0.441092 | 0.647715  |
| 43            | 1             | 0.466692                | 3.415572  | 0.608208  |
| 44            | 1             | -3.409561               | 0.467254  | 0.620717  |
| 45            | 8             | -0.031286               | -0.379519 | -2.463817 |
| 46            | 1             | 0.610195                | -1.110188 | -2.533969 |
| 47            | 1             | -0.897496               | -0.787741 | -2.636402 |
| 48            | 7             | -3.313610               | 3.095973  | -0.770500 |

|    |    |           |           |           |
|----|----|-----------|-----------|-----------|
| 49 | 7  | 3.110524  | 3.304824  | -0.753967 |
| 50 | 7  | 3.356049  | -3.067033 | -0.749836 |
| 51 | 7  | -3.141667 | -3.287146 | -0.729795 |
| 52 | 1  | -4.254849 | 3.381480  | -0.441414 |
| 53 | 1  | 3.391432  | 4.249121  | -0.430390 |
| 54 | 1  | 4.287613  | -3.363815 | -0.401419 |
| 55 | 1  | -3.430604 | -4.225141 | -0.392758 |
| 56 | 6  | -3.945134 | -2.989089 | -1.908794 |
| 57 | 1  | -3.307009 | -2.832734 | -2.784707 |
| 58 | 6  | -3.019453 | 3.877707  | -1.964879 |
| 59 | 1  | -2.853563 | 3.222814  | -2.826419 |
| 60 | 6  | 3.907729  | 2.998618  | -1.934973 |
| 61 | 1  | 3.264247  | 2.824174  | -2.803395 |
| 62 | 6  | 3.081215  | -3.844003 | -1.952089 |
| 63 | 1  | 2.947820  | -3.186660 | -2.817559 |
| 64 | 1  | -4.537303 | -2.081214 | -1.755390 |
| 65 | 1  | -2.117257 | 4.480981  | -1.821124 |
| 66 | 1  | 4.508928  | 2.097878  | -1.774203 |
| 67 | 1  | 2.167485  | -4.434696 | -1.831581 |
| 68 | 6  | -4.263514 | 4.796952  | -2.202835 |
| 69 | 8  | -5.195296 | 4.654209  | -1.350377 |
| 70 | 8  | -4.198957 | 5.558088  | -3.191371 |
| 71 | 6  | 4.830562  | 4.239811  | -2.173786 |
| 72 | 8  | 4.677947  | 5.180170  | -1.332608 |
| 73 | 8  | 5.603916  | 4.165063  | -3.152156 |
| 74 | 6  | 4.319508  | -4.779316 | -2.158319 |
| 75 | 8  | 4.269735  | -5.540797 | -3.147034 |
| 76 | 8  | 5.231274  | -4.645819 | -1.283048 |
| 77 | 6  | -4.879675 | -4.226420 | -2.123132 |
| 78 | 8  | -4.727352 | -5.155391 | -1.269269 |
| 79 | 8  | -5.659474 | -4.159471 | -3.096513 |
| 80 | 6  | 2.110703  | 4.243645  | 1.728637  |
| 81 | 1  | 3.125364  | 3.994048  | 2.049763  |
| 82 | 1  | 2.159987  | 5.103861  | 1.055568  |
| 83 | 1  | 1.539070  | 4.566354  | 2.601366  |
| 84 | 6  | -4.233437 | 2.121886  | 1.728372  |
| 85 | 1  | -3.985613 | 3.142231  | 2.032356  |
| 86 | 1  | -5.099476 | 2.157711  | 1.061928  |
| 87 | 1  | -4.546203 | 1.561930  | 2.612227  |
| 88 | 6  | -2.109494 | -4.219891 | 1.738711  |
| 89 | 1  | -3.120858 | -3.971155 | 2.070626  |
| 90 | 1  | -2.164903 | -5.080197 | 1.066230  |
| 91 | 1  | -1.528352 | -4.542075 | 2.605168  |
| 92 | 6  | 4.233456  | -2.100149 | 1.764311  |
| 93 | 1  | 3.980068  | -3.121587 | 2.059906  |
| 94 | 1  | 5.110097  | -2.133751 | 1.111762  |
| 95 | 1  | 4.532628  | -1.544473 | 2.655428  |
| 96 | 57 | -0.000071 | 0.014789  | 0.146876  |

E(RTPSSh) = -2542.844013 Hartree

Zero-point correction = 0.780582 Hartree/particle

Sum of electronic and thermal Energies = -2542.009901 Hartree

Sum of electronic and thermal Enthalpies = -2542.008957 Hartree

Sum of electronic and thermal Free Energies = -2542.155485 Hartree

**Table S47.** [Ce(DOTMA-(gly)<sub>4</sub>(H<sub>2</sub>O)]<sup>-</sup> [TSAP, Δ(δδδδ)], TPSSh/LCRECP/6-31G(d,p), aqueous solution (0 Imaginary Frequencies)

| Center<br>Number | Atomic<br>Number | Coordinates (Angstroms) |   |   |
|------------------|------------------|-------------------------|---|---|
|                  |                  | X                       | Y | Z |

|    |   |           |           |           |
|----|---|-----------|-----------|-----------|
| 1  | 7 | -1.080883 | -1.864952 | 1.891583  |
| 2  | 6 | -0.104898 | -2.200902 | 2.964673  |
| 3  | 6 | 1.337429  | -2.328916 | 2.481620  |
| 4  | 7 | 1.879676  | -1.066191 | 1.894653  |
| 5  | 6 | 2.200043  | -0.094470 | 2.976700  |
| 6  | 6 | 2.331640  | 1.350432  | 2.501990  |
| 7  | 7 | 1.075563  | 1.890244  | 1.898597  |
| 8  | 6 | 0.099650  | 2.228045  | 2.970567  |
| 9  | 6 | -1.342801 | 2.352454  | 2.487065  |
| 10 | 7 | -1.879281 | 1.089685  | 1.894674  |
| 11 | 6 | -2.208247 | 0.117886  | 2.972835  |
| 12 | 6 | -2.338140 | -1.325893 | 2.494501  |
| 13 | 6 | -1.392810 | -3.047303 | 1.017645  |
| 14 | 6 | -2.187292 | -2.517325 | -0.187179 |
| 15 | 8 | -1.928254 | -1.353055 | -0.633936 |
| 16 | 6 | 3.075194  | -1.367252 | 1.035648  |
| 17 | 6 | 2.569084  | -2.134502 | -0.195883 |
| 18 | 8 | 1.410275  | -1.872178 | -0.656645 |
| 19 | 6 | 1.387171  | 3.067498  | 1.019105  |
| 20 | 6 | 2.174167  | 2.527120  | -0.187552 |
| 21 | 8 | 1.928744  | 1.353695  | -0.612324 |
| 22 | 6 | -3.063261 | 1.390943  | 1.020619  |
| 23 | 6 | -2.534467 | 2.163657  | -0.199722 |
| 24 | 8 | -1.366383 | 1.910451  | -0.635736 |
| 25 | 1 | -0.175057 | -1.417492 | 3.722275  |
| 26 | 1 | -0.377368 | -3.131893 | 3.476839  |
| 27 | 1 | 1.408204  | -3.110709 | 1.720296  |
| 28 | 1 | 1.948307  | -2.657238 | 3.332950  |
| 29 | 1 | 1.407104  | -0.167716 | 3.724029  |
| 30 | 1 | 3.124792  | -0.368160 | 3.499658  |
| 31 | 1 | 3.125765  | 1.427385  | 1.754622  |
| 32 | 1 | 2.644087  | 1.958549  | 3.361304  |
| 33 | 1 | 0.170330  | 1.446530  | 3.730266  |
| 34 | 1 | 0.370697  | 3.161041  | 3.480280  |
| 35 | 1 | -1.416056 | 3.137272  | 1.729319  |
| 36 | 1 | -1.955870 | 2.674685  | 3.339216  |
| 37 | 1 | -1.420391 | 0.189770  | 3.725788  |
| 38 | 1 | -3.136739 | 0.390972  | 3.489754  |
| 39 | 1 | -3.130678 | -1.400993 | 1.745075  |
| 40 | 1 | -2.652179 | -1.936509 | 3.351342  |
| 41 | 1 | -0.433094 | -3.378337 | 0.600357  |
| 42 | 1 | 3.415741  | -0.400758 | 0.643355  |
| 43 | 1 | 0.426268  | 3.400746  | 0.606637  |
| 44 | 1 | -3.398627 | 0.425402  | 0.621341  |
| 45 | 8 | -0.032388 | -0.327117 | -2.420345 |
| 46 | 1 | 0.613882  | -1.051284 | -2.509553 |
| 47 | 1 | -0.897283 | -0.740809 | -2.587601 |
| 48 | 7 | -3.317952 | 3.047272  | -0.779026 |
| 49 | 7 | 3.062916  | 3.306261  | -0.765312 |
| 50 | 7 | 3.357649  | -3.019298 | -0.763708 |
| 51 | 7 | -3.091926 | -3.291556 | -0.744225 |
| 52 | 1 | -4.266381 | 3.321934  | -0.461276 |
| 53 | 1 | 3.331947  | 4.258470  | -0.454645 |
| 54 | 1 | 4.297525  | -3.304950 | -0.428165 |
| 55 | 1 | -3.370783 | -4.237077 | -0.419247 |
| 56 | 6 | -3.896756 | -2.989145 | -1.921302 |
| 57 | 1 | -3.259090 | -2.817240 | -2.794650 |
| 58 | 6 | -3.020050 | 3.830136  | -1.971789 |
| 59 | 1 | -2.838062 | 3.175631  | -2.830385 |
| 60 | 6 | 3.861486  | 2.995957  | -1.944400 |
| 61 | 1 | 3.218489  | 2.803051  | -2.809280 |
| 62 | 6 | 3.076979  | -3.798037 | -1.963534 |



|    |    |           |           |           |
|----|----|-----------|-----------|-----------|
| 63 | 1  | 2.927477  | -3.141317 | -2.826881 |
| 64 | 1  | -4.498344 | -2.089073 | -1.759085 |
| 65 | 1  | -2.126153 | 4.443623  | -1.819808 |
| 66 | 1  | 4.474397  | 2.104937  | -1.774125 |
| 67 | 1  | 2.170569  | -4.397790 | -1.833274 |
| 68 | 6  | -4.271879 | 4.734954  | -2.224243 |
| 69 | 8  | -5.211073 | 4.582498  | -1.381648 |
| 70 | 8  | -4.205438 | 5.495584  | -3.212999 |
| 71 | 6  | 4.767831  | 4.246050  | -2.199888 |
| 72 | 8  | 4.603669  | 5.194753  | -1.370327 |
| 73 | 8  | 5.541117  | 4.169179  | -3.178082 |
| 74 | 6  | 4.322506  | -4.720357 | -2.184668 |
| 75 | 8  | 4.268607  | -5.482836 | -3.172320 |
| 76 | 8  | 5.243612  | -4.576424 | -1.320894 |
| 77 | 6  | -4.817972 | -4.234053 | -2.149831 |
| 78 | 8  | -4.655517 | -5.170823 | -1.306398 |
| 79 | 8  | -5.598204 | -4.164669 | -3.122585 |
| 80 | 6  | 2.064063  | 4.256092  | 1.716428  |
| 81 | 1  | 3.082626  | 4.020678  | 2.035884  |
| 82 | 1  | 2.101324  | 5.111521  | 1.036518  |
| 83 | 1  | 1.491685  | 4.578970  | 2.588619  |
| 84 | 6  | -4.247321 | 2.074283  | 1.719527  |
| 85 | 1  | -4.012686 | 3.098398  | 2.021275  |
| 86 | 1  | -5.109356 | 2.098347  | 1.047378  |
| 87 | 1  | -4.559583 | 1.514111  | 2.603445  |
| 88 | 6  | -2.060395 | -4.236672 | 1.722261  |
| 89 | 1  | -3.075808 | -4.002624 | 2.052498  |
| 90 | 1  | -2.103490 | -5.091745 | 1.042241  |
| 91 | 1  | -1.478651 | -4.559448 | 2.588097  |
| 92 | 6  | 4.249212  | -2.053720 | 1.748615  |
| 93 | 1  | 4.010417  | -3.079034 | 2.042977  |
| 94 | 1  | 5.120358  | -2.075040 | 1.088229  |
| 95 | 1  | 4.549667  | -1.497455 | 2.638951  |
| 96 | 58 | 0.000838  | 0.015141  | 0.176751  |

E(RTPSSh) = -2543.4959883 Hartree

Zero-point correction = 0.780687 Hartree/particle

Sum of electronic and thermal Energies = -2542.661835 Hartree

Sum of electronic and thermal Enthalpies = -2542.660891 Hartree

Sum of electronic and thermal Free Energies = -2542.807008 Hartree

**Table S48.** [Pr(DOTMA-(gly)<sub>4</sub>(H<sub>2</sub>O)]<sup>-</sup> [TSAP, Δ(δδδδ)], TPSSh/LCRECP/6-31G(d,p), aqueous solution (0 Imaginary Frequencies)

| Center Number | Atomic Number | Coordinates (Angstroms) |           |           |
|---------------|---------------|-------------------------|-----------|-----------|
|               |               | X                       | Y         | Z         |
| 1             | 7             | -1.071933               | -1.870342 | 1.902771  |
| 2             | 6             | -0.092654               | -2.204791 | 2.973695  |
| 3             | 6             | 1.350998                | -2.323848 | 2.490341  |
| 4             | 7             | 1.890567                | -1.060348 | 1.900694  |
| 5             | 6             | 2.214077                | -0.085861 | 2.979413  |
| 6             | 6             | 2.335355                | 1.359952  | 2.503058  |
| 7             | 7             | 1.075975                | 1.898238  | 1.903195  |
| 8             | 6             | 0.100425                | 2.235711  | 2.976043  |
| 9             | 6             | -1.344617               | 2.351441  | 2.496288  |
| 10            | 7             | -1.881520               | 1.087111  | 1.905679  |
| 11            | 6             | -2.208416               | 0.113673  | 2.983373  |
| 12            | 6             | -2.330113               | -1.331839 | 2.506155  |
| 13            | 6             | -1.382560               | -3.047935 | 1.024777  |
| 14            | 6             | -2.168911               | -2.509045 | -0.180434 |

|    |    |           |           |           |
|----|----|-----------|-----------|-----------|
| 15 | 8  | -1.908713 | -1.341588 | -0.616611 |
| 16 | 6  | 3.076902  | -1.360677 | 1.031302  |
| 17 | 6  | 2.552837  | -2.124542 | -0.193874 |
| 18 | 8  | 1.393014  | -1.852549 | -0.644124 |
| 19 | 6  | 1.383648  | 3.070447  | 1.018060  |
| 20 | 6  | 2.157727  | 2.520343  | -0.191399 |
| 21 | 8  | 1.901280  | 1.348065  | -0.611294 |
| 22 | 6  | -3.061743 | 1.386914  | 1.028475  |
| 23 | 6  | -2.524316 | 2.150515  | -0.192683 |
| 24 | 8  | -1.357299 | 1.888439  | -0.624486 |
| 25 | 1  | -0.167038 | -1.423442 | 3.732556  |
| 26 | 1  | -0.359202 | -3.139879 | 3.481231  |
| 27 | 1  | 1.426146  | -3.107526 | 1.731589  |
| 28 | 1  | 1.962679  | -2.647986 | 3.342563  |
| 29 | 1  | 1.425910  | -0.163734 | 3.730906  |
| 30 | 1  | 3.144897  | -0.353970 | 3.494167  |
| 31 | 1  | 3.127026  | 1.439858  | 1.753474  |
| 32 | 1  | 2.649062  | 1.969349  | 3.360818  |
| 33 | 1  | 0.177556  | 1.456890  | 3.737393  |
| 34 | 1  | 0.367628  | 3.173072  | 3.479402  |
| 35 | 1  | -1.423586 | 3.136124  | 1.739120  |
| 36 | 1  | -1.955800 | 2.672231  | 3.350157  |
| 37 | 1  | -1.422078 | 0.191185  | 3.736886  |
| 38 | 1  | -3.140651 | 0.381843  | 3.495794  |
| 39 | 1  | -3.123113 | -1.410720 | 1.757793  |
| 40 | 1  | -2.642177 | -1.942112 | 3.363809  |
| 41 | 1  | -0.422255 | -3.379119 | 0.609579  |
| 42 | 1  | 3.413896  | -0.394595 | 0.635462  |
| 43 | 1  | 0.421005  | 3.404310  | 0.610863  |
| 44 | 1  | -3.398130 | 0.420841  | 0.631981  |
| 45 | 8  | -0.049982 | -0.272696 | -2.373640 |
| 46 | 1  | 0.605229  | -0.984914 | -2.487603 |
| 47 | 1  | -0.912067 | -0.702321 | -2.515445 |
| 48 | 59 | 0.001450  | 0.016342  | 0.217832  |
| 49 | 7  | -3.297856 | 3.038795  | -0.780736 |
| 50 | 7  | 3.050029  | 3.288887  | -0.780194 |
| 51 | 7  | 3.324828  | -3.020721 | -0.769204 |
| 52 | 7  | -3.071372 | -3.277153 | -0.751682 |
| 53 | 1  | -4.238610 | 3.316932  | -0.457958 |
| 54 | 1  | 3.325201  | 4.232623  | -0.463784 |
| 55 | 1  | 4.259198  | -3.307719 | -0.434048 |
| 56 | 1  | -3.348035 | -4.217644 | -0.425042 |
| 57 | 6  | -3.867310 | -2.951958 | -1.928477 |
| 58 | 1  | -3.222763 | -2.778927 | -2.796408 |
| 59 | 6  | -2.977099 | 3.811202  | -1.974104 |
| 60 | 1  | -2.800206 | 3.148885  | -2.827756 |
| 61 | 6  | 3.835449  | 2.955899  | -1.961638 |
| 62 | 1  | 3.182784  | 2.771212  | -2.821042 |
| 63 | 6  | 3.010691  | -3.796925 | -1.962063 |
| 64 | 1  | 2.858946  | -3.138275 | -2.823419 |
| 65 | 1  | -4.455215 | -2.044376 | -1.758178 |
| 66 | 1  | -2.072152 | 4.406931  | -1.816951 |
| 67 | 1  | 4.428829  | 2.052224  | -1.788852 |
| 68 | 1  | 2.093966  | -4.376709 | -1.814641 |
| 69 | 6  | -4.200240 | 4.741478  | -2.249720 |
| 70 | 8  | -5.156365 | 4.629278  | -1.421697 |
| 71 | 8  | -4.102088 | 5.489275  | -3.248438 |
| 72 | 6  | 4.769877  | 4.175660  | -2.238700 |
| 73 | 8  | 4.650321  | 5.139231  | -1.420422 |
| 74 | 8  | 5.527942  | 4.067843  | -3.228650 |
| 75 | 6  | 4.224387  | -4.747430 | -2.210879 |
| 76 | 8  | 4.128512  | -5.505576 | -3.201637 |

|    |   |           |           |           |
|----|---|-----------|-----------|-----------|
| 77 | 8 | 5.171218  | -4.637169 | -1.372077 |
| 78 | 6 | -4.808373 | -4.171714 | -2.183798 |
| 79 | 8 | -4.681431 | -5.127725 | -1.357823 |
| 80 | 8 | -5.576907 | -4.070833 | -3.165994 |
| 81 | 6 | 2.067979  | 4.261176  | 1.704232  |
| 82 | 1 | 3.090425  | 4.028355  | 2.012816  |
| 83 | 1 | 2.094959  | 5.115856  | 1.022927  |
| 84 | 1 | 1.504786  | 4.583016  | 2.582599  |
| 85 | 6 | -4.247066 | 2.075686  | 1.719634  |
| 86 | 1 | -4.014000 | 3.102107  | 2.014445  |
| 87 | 1 | -5.108727 | 2.092933  | 1.046826  |
| 88 | 1 | -4.558243 | 1.521501  | 2.607544  |
| 89 | 6 | -2.055213 | -4.239278 | 1.721169  |
| 90 | 1 | -3.073838 | -4.007956 | 2.043165  |
| 91 | 1 | -2.089559 | -5.094457 | 1.040841  |
| 92 | 1 | -1.480040 | -4.559865 | 2.592063  |
| 93 | 6 | 4.258545  | -2.047448 | 1.730687  |
| 94 | 1 | 4.024156  | -3.072983 | 2.027602  |
| 95 | 1 | 5.123495  | -2.066505 | 1.062155  |
| 96 | 1 | 4.565517  | -1.490781 | 2.618400  |

E(RTPSSh) = -2544.1537075 Hartree

Zero-point correction = 0.781716 Hartree/particle

Sum of electronic and thermal Energies = -2543.318716 Hartree

Sum of electronic and thermal Enthalpies = -2543.317772 Hartree

Sum of electronic and thermal Free Energies = -2543.462370 Hartree

**Table S49.** [Nd(DOTMA-(gly)<sub>4</sub>(H<sub>2</sub>O)]<sup>-</sup> [TSAP, Δ(δδδδ)], TPSSh/LCRECP/6-31G(d,p), aqueous solution (0 Imaginary Frequencies)

| Center Number | Atomic Number | Coordinates (Angstroms) |           |           |
|---------------|---------------|-------------------------|-----------|-----------|
|               |               | X                       | Y         | Z         |
| 1             | 7             | -1.057838               | -1.873705 | 1.910346  |
| 2             | 6             | -0.079345               | -2.208310 | 2.981428  |
| 3             | 6             | 1.364594                | -2.317502 | 2.497996  |
| 4             | 7             | 1.892581                | -1.049094 | 1.908921  |
| 5             | 6             | 2.214572                | -0.076204 | 2.988941  |
| 6             | 6             | 2.326660                | 1.370285  | 2.513624  |
| 7             | 7             | 1.063041                | 1.897868  | 1.913355  |
| 8             | 6             | 0.088333                | 2.234531  | 2.986771  |
| 9             | 6             | -1.357029               | 2.340641  | 2.507045  |
| 10            | 7             | -1.882393               | 1.072083  | 1.915466  |
| 11            | 6             | -2.207535               | 0.098659  | 2.993161  |
| 12            | 6             | -2.320196               | -1.346855 | 2.514903  |
| 13            | 6             | -1.359438               | -3.048023 | 1.025248  |
| 14            | 6             | -2.143887               | -2.504875 | -0.178615 |
| 15            | 8             | -1.890883               | -1.330865 | -0.602013 |
| 16            | 6             | 3.076337                | -1.339137 | 1.033123  |
| 17            | 6             | 2.549026                | -2.099870 | -0.191972 |
| 18            | 8             | 1.381842                | -1.836681 | -0.629073 |
| 19            | 6             | 1.362159                | 3.067830  | 1.022565  |
| 20            | 6             | 2.134407                | 2.514451  | -0.185985 |
| 21            | 8             | 1.886670                | 1.335670  | -0.593206 |
| 22            | 6             | -3.060602               | 1.362974  | 1.032924  |
| 23            | 6             | -2.520460               | 2.124962  | -0.187415 |
| 24            | 8             | -1.347178               | 1.871540  | -0.607657 |
| 25            | 1             | -0.158659               | -1.430185 | 3.743126  |
| 26            | 1             | -0.342236               | -3.146784 | 3.484619  |
| 27            | 1             | 1.445217                | -3.100449 | 1.739070  |
| 28            | 1             | 1.979563                | -2.637192 | 3.349528  |

|    |   |           |           |           |
|----|---|-----------|-----------|-----------|
| 29 | 1 | 1.428205  | -0.159624 | 3.741776  |
| 30 | 1 | 3.147998  | -0.340933 | 3.500770  |
| 31 | 1 | 3.118354  | 1.456175  | 1.764734  |
| 32 | 1 | 2.635101  | 1.982251  | 3.371428  |
| 33 | 1 | 0.170644  | 1.458426  | 3.750387  |
| 34 | 1 | 0.351714  | 3.174969  | 3.486383  |
| 35 | 1 | -1.441539 | 3.125339  | 1.750491  |
| 36 | 1 | -1.971490 | 2.655989  | 3.360567  |
| 37 | 1 | -1.422930 | 0.180592  | 3.748049  |
| 38 | 1 | -3.142263 | 0.362775  | 3.503159  |
| 39 | 1 | -3.113327 | -1.430569 | 1.767202  |
| 40 | 1 | -2.627083 | -1.960822 | 3.371780  |
| 41 | 1 | -0.396237 | -3.371963 | 0.611292  |
| 42 | 1 | 3.406015  | -0.369709 | 0.639582  |
| 43 | 1 | 0.396762  | 3.395439  | 0.617093  |
| 44 | 1 | -3.390342 | 0.394142  | 0.637914  |
| 45 | 8 | -0.045372 | -0.244835 | -2.339299 |
| 46 | 1 | 0.608370  | -0.958199 | -2.455045 |
| 47 | 1 | -0.908094 | -0.672775 | -2.482604 |
| 48 | 7 | -3.297125 | 3.002899  | -0.786555 |
| 49 | 7 | 3.016235  | 3.285645  | -0.786677 |
| 50 | 7 | 3.324559  | -2.983955 | -0.780702 |
| 51 | 7 | -3.037324 | -3.274544 | -0.761413 |
| 52 | 1 | -4.243535 | 3.272996  | -0.473369 |
| 53 | 1 | 3.283485  | 4.235184  | -0.480696 |
| 54 | 1 | 4.264449  | -3.264329 | -0.455136 |
| 55 | 1 | -3.307830 | -4.220290 | -0.444519 |
| 56 | 6 | -3.830963 | -2.945814 | -1.938796 |
| 57 | 1 | -3.184395 | -2.760103 | -2.802564 |
| 58 | 6 | -2.975277 | 3.771103  | -1.982341 |
| 59 | 1 | -2.783043 | 3.105304  | -2.829916 |
| 60 | 6 | 3.797692  | 2.950670  | -1.970205 |
| 61 | 1 | 3.141627  | 2.750969  | -2.823622 |
| 62 | 6 | 3.008579  | -3.755357 | -1.976197 |
| 63 | 1 | 2.845386  | -3.092708 | -2.832395 |
| 64 | 1 | -4.427290 | -2.044782 | -1.763182 |
| 65 | 1 | -2.079103 | 4.378978  | -1.821485 |
| 66 | 1 | 4.402477  | 2.055430  | -1.793184 |
| 67 | 1 | 2.098005  | -4.343996 | -1.826045 |
| 68 | 6 | -4.207246 | 4.684613  | -2.274497 |
| 69 | 8 | -5.167985 | 4.567858  | -1.452444 |
| 70 | 8 | -4.110649 | 5.425236  | -3.278671 |
| 71 | 6 | 4.716420  | 4.178471  | -2.264062 |
| 72 | 8 | 4.591721  | 5.147403  | -1.452893 |
| 73 | 8 | 5.468915  | 4.070733  | -3.258229 |
| 74 | 6 | 4.228975  | -4.693479 | -2.239332 |
| 75 | 8 | 4.132921  | -5.446490 | -3.233939 |
| 76 | 8 | 5.180704  | -4.579503 | -1.406558 |
| 77 | 6 | -4.760570 | -4.171433 | -2.208134 |
| 78 | 8 | -4.629105 | -5.132827 | -1.389118 |
| 79 | 8 | -5.525715 | -4.069150 | -3.192777 |
| 80 | 6 | 2.043899  | 4.264457  | 1.700897  |
| 81 | 1 | 3.069358  | 4.038279  | 2.004298  |
| 82 | 1 | 2.062290  | 5.117000  | 1.016633  |
| 83 | 1 | 1.483894  | 4.586017  | 2.581412  |
| 84 | 6 | -4.252105 | 2.048372  | 1.716647  |
| 85 | 1 | -4.026205 | 3.077768  | 2.006541  |
| 86 | 1 | -5.111733 | 2.056781  | 1.041069  |
| 87 | 1 | -4.562620 | 1.497047  | 2.606586  |
| 88 | 6 | -2.029098 | -4.246424 | 1.712222  |
| 89 | 1 | -3.050985 | -4.022721 | 2.029182  |
| 90 | 1 | -2.054304 | -5.098676 | 1.027826  |

|    |    |           |           |          |
|----|----|-----------|-----------|----------|
| 91 | 1  | -1.457087 | -4.567401 | 2.585059 |
| 92 | 6  | 4.264967  | -2.022977 | 1.723335 |
| 93 | 1  | 4.038565  | -3.052112 | 2.013846 |
| 94 | 1  | 5.127583  | -2.031562 | 1.051578 |
| 95 | 1  | 4.571272  | -1.470371 | 2.613827 |
| 96 | 60 | 0.002159  | 0.016846  | 0.240085 |

E(RTPSSh) = -2544.7764488 Hartree

Zero-point correction = 0.781819 Hartree/particle

Sum of electronic and thermal Energies = -2543.941424 Hartree

Sum of electronic and thermal Enthalpies = -2543.940480 Hartree

Sum of electronic and thermal Free Energies = -2544.084912 Hartree

**Table S50.** [Sm(DOTMA-(gly)<sub>4</sub>(H<sub>2</sub>O)]<sup>-</sup> [TSAP, Δ(δδδδ)], TPSSh/LCRECP/6-31G(d,p), aqueous solution (0 Imaginary Frequencies)

| Center Number | Atomic Number | Coordinates (Angstroms) |           |           |
|---------------|---------------|-------------------------|-----------|-----------|
|               |               | X                       | Y         | Z         |
| 1             | 7             | -1.030977               | -1.881051 | 1.921819  |
| 2             | 6             | -0.054085               | -2.217618 | 2.992962  |
| 3             | 6             | 1.389959                | -2.308247 | 2.509087  |
| 4             | 7             | 1.896781                | -1.030603 | 1.922224  |
| 5             | 6             | 2.216497                | -0.061711 | 3.005631  |
| 6             | 6             | 2.311705                | 1.386150  | 2.533334  |
| 7             | 7             | 1.040565                | 1.895003  | 1.932940  |
| 8             | 6             | 0.067513                | 2.229650  | 3.007834  |
| 9             | 6             | -1.378053               | 2.318417  | 2.527926  |
| 10            | 7             | -1.882236               | 1.042805  | 1.933575  |
| 11            | 6             | -2.204310               | 0.068664  | 3.010737  |
| 12            | 6             | -2.300625               | -1.376005 | 2.529013  |
| 13            | 6             | -1.317806               | -3.049325 | 1.024627  |
| 14            | 6             | -2.097779               | -2.497565 | -0.176877 |
| 15            | 8             | -1.855327               | -1.312943 | -0.577537 |
| 16            | 6             | 3.076525                | -1.302986 | 1.036549  |
| 17            | 6             | 2.543558                | -2.055551 | -0.189900 |
| 18            | 8             | 1.363965                | -1.807069 | -0.603213 |
| 19            | 6             | 1.325404                | 3.062658  | 1.034893  |
| 20            | 6             | 2.092642                | 2.505256  | -0.173795 |
| 21            | 8             | 1.859945                | 1.315932  | -0.559355 |
| 22            | 6             | -3.057965               | 1.319618  | 1.043894  |
| 23            | 6             | -2.513602               | 2.078644  | -0.175075 |
| 24            | 8             | -1.330183               | 1.839363  | -0.575274 |
| 25            | 1             | -0.141969               | -1.446889 | 3.761270  |
| 26            | 1             | -0.310428               | -3.162974 | 3.486577  |
| 27            | 1             | 1.480564                | -3.088724 | 1.748737  |
| 28            | 1             | 2.011175                | -2.620756 | 3.358710  |
| 29            | 1             | 1.434056                | -0.155789 | 3.761423  |
| 30            | 1             | 3.154917                | -0.320773 | 3.511278  |
| 31            | 1             | 3.102844                | 1.483478  | 1.785250  |
| 32            | 1             | 2.610991                | 2.002141  | 3.391415  |
| 33            | 1             | 0.158920                | 1.458576  | 3.775589  |
| 34            | 1             | 0.323983                | 3.175451  | 3.500843  |
| 35            | 1             | -1.472678               | 3.103355  | 1.772774  |
| 36            | 1             | -1.998742               | 2.623321  | 3.380688  |
| 37            | 1             | -1.423223               | 0.157589  | 3.768557  |
| 38            | 1             | -3.143569               | 0.325188  | 3.516301  |
| 39            | 1             | -3.093594               | -1.467818 | 1.782027  |
| 40            | 1             | -2.598289               | -1.997755 | 3.383506  |
| 41            | 1             | -0.349965               | -3.362252 | 0.613795  |
| 42            | 1             | 3.396073                | -0.327881 | 0.649609  |

|    |    |           |           |           |
|----|----|-----------|-----------|-----------|
| 43 | 1  | 0.355386  | 3.381778  | 0.634482  |
| 44 | 1  | -3.378139 | 0.346716  | 0.651914  |
| 45 | 8  | -0.033095 | -0.192930 | -2.276261 |
| 46 | 1  | 0.617131  | -0.909175 | -2.394634 |
| 47 | 1  | -0.897256 | -0.616047 | -2.425202 |
| 48 | 7  | -3.294596 | 2.939190  | -0.793010 |
| 49 | 7  | 2.954769  | 3.281260  | -0.795974 |
| 50 | 7  | 3.324470  | -2.917065 | -0.803714 |
| 51 | 7  | -2.976739 | -3.267674 | -0.779974 |
| 52 | 1  | -4.250903 | 3.194274  | -0.497261 |
| 53 | 1  | 3.206899  | 4.240978  | -0.508938 |
| 54 | 1  | 4.273707  | -3.186342 | -0.495502 |
| 55 | 1  | -3.237897 | -4.221999 | -0.480575 |
| 56 | 6  | -3.765912 | -2.930977 | -1.958134 |
| 57 | 1  | -3.115762 | -2.724508 | -2.814431 |
| 58 | 6  | -2.971226 | 3.698550  | -1.994022 |
| 59 | 1  | -2.748768 | 3.026183  | -2.828816 |
| 60 | 6  | 3.726296  | 2.944180  | -1.985428 |
| 61 | 1  | 3.062625  | 2.715451  | -2.825505 |
| 62 | 6  | 3.005204  | -3.677907 | -2.005127 |
| 63 | 1  | 2.822269  | -3.007151 | -2.850991 |
| 64 | 1  | -4.374908 | -2.040350 | -1.773399 |
| 65 | 1  | -2.093060 | 4.330604  | -1.827106 |
| 66 | 1  | 4.354263  | 2.066192  | -1.802911 |
| 67 | 1  | 2.105531  | -4.282155 | -1.851752 |
| 68 | 6  | -4.220012 | 4.577714  | -2.318679 |
| 69 | 8  | -5.189366 | 4.451737  | -1.508113 |
| 70 | 8  | -4.126237 | 5.304250  | -3.333315 |
| 71 | 6  | 4.612131  | 4.187688  | -2.312631 |
| 72 | 8  | 4.477187  | 5.166429  | -1.514923 |
| 73 | 8  | 5.351956  | 4.081137  | -3.316342 |
| 74 | 6  | 4.236824  | -4.593575 | -2.294585 |
| 75 | 8  | 4.140656  | -5.335489 | -3.297394 |
| 76 | 8  | 5.196405  | -4.475055 | -1.471427 |
| 77 | 6  | -4.677695 | -4.164514 | -2.252022 |
| 78 | 8  | -4.538861 | -5.136096 | -1.446269 |
| 79 | 8  | -5.437509 | -4.057776 | -3.240218 |
| 80 | 6  | 2.005142  | 4.266939  | 1.701496  |
| 81 | 1  | 3.035742  | 4.050063  | 1.993859  |
| 82 | 1  | 2.009007  | 5.117206  | 1.014180  |
| 83 | 1  | 1.452355  | 4.586881  | 2.587188  |
| 84 | 6  | -4.258239 | 2.000509  | 1.716545  |
| 85 | 1  | -4.042975 | 3.034549  | 1.997688  |
| 86 | 1  | -5.115131 | 1.994932  | 1.037476  |
| 87 | 1  | -4.567153 | 1.454387  | 2.610303  |
| 88 | 6  | -1.984371 | -4.258722 | 1.694963  |
| 89 | 1  | -3.011493 | -4.046516 | 2.002657  |
| 90 | 1  | -1.994849 | -5.105688 | 1.003652  |
| 91 | 1  | -1.418715 | -4.581351 | 2.571352  |
| 92 | 6  | 4.274998  | -1.985351 | 1.710982  |
| 93 | 1  | 4.060219  | -3.020883 | 1.987042  |
| 94 | 1  | 5.134490  | -1.975406 | 1.035263  |
| 95 | 1  | 4.579658  | -1.442791 | 2.608232  |
| 96 | 62 | 0.004513  | 0.017584  | 0.277744  |

-----  
E(RTPSSh) = -2545.9989206 Hartree

Zero-point correction = 0.781851 Hartree/particle

Sum of electronic and thermal Energies = -2545.163921 Hartree

Sum of electronic and thermal Enthalpies = -2545.162977 Hartree

Sum of electronic and thermal Free Energies = -2545.307690 Hartree

**Table S51.** [Eu(DOTMA-(gly)<sub>4</sub>(H<sub>2</sub>O)]<sup>-</sup> [TSAP, Δ(δδδδ)], TPSSh/LCRECP/6-31G(d,p), aqueous solution (0 Imaginary Frequencies)

| Center Number | Atomic Number | Coordinates (Angstroms) |           |           |
|---------------|---------------|-------------------------|-----------|-----------|
|               |               | X                       | Y         | Z         |
| 1             | 7             | -1.007411               | -1.895922 | 1.929433  |
| 2             | 6             | -0.029610               | -2.233553 | 2.999084  |
| 3             | 6             | 1.414539                | -2.307948 | 2.514347  |
| 4             | 7             | 1.906367                | -1.021965 | 1.933855  |
| 5             | 6             | 2.220517                | -0.057483 | 3.022379  |
| 6             | 6             | 2.302706                | 1.392879  | 2.556392  |
| 7             | 7             | 1.026297                | 1.890902  | 1.958318  |
| 8             | 6             | 0.052733                | 2.217222  | 3.035132  |
| 9             | 6             | -1.393207               | 2.292977  | 2.555322  |
| 10            | 7             | -1.882095               | 1.014240  | 1.955385  |
| 11            | 6             | -2.198580               | 0.034320  | 3.028607  |
| 12            | 6             | -2.282120               | -1.408216 | 2.539421  |
| 13            | 6             | -1.282926               | -3.059736 | 1.023342  |
| 14            | 6             | -2.059417               | -2.503656 | -0.177791 |
| 15            | 8             | -1.828358               | -1.311012 | -0.561676 |
| 16            | 6             | 3.085926                | -1.277947 | 1.043705  |
| 17            | 6             | 2.554545                | -2.020130 | -0.189231 |
| 18            | 8             | 1.367425                | -1.784250 | -0.588753 |
| 19            | 6             | 1.300054                | 3.062432  | 1.062291  |
| 20            | 6             | 2.060713                | 2.511938  | -0.153185 |
| 21            | 8             | 1.845973                | 1.315649  | -0.527626 |
| 22            | 6             | -3.058404               | 1.282988  | 1.064452  |
| 23            | 6             | -2.516117               | 2.042806  | -0.154335 |
| 24            | 8             | -1.325136               | 1.820888  | -0.541958 |
| 25            | 1             | -0.124305               | -1.469800 | 3.773511  |
| 26            | 1             | -0.278938               | -3.185011 | 3.484493  |
| 27            | 1             | 1.512628                | -3.083446 | 1.749870  |
| 28            | 1             | 2.040100                | -2.618189 | 3.361585  |
| 29            | 1             | 1.439508                | -0.162044 | 3.778352  |
| 30            | 1             | 3.161768                | -0.312077 | 3.525095  |
| 31            | 1             | 3.092567                | 1.500736  | 1.808440  |
| 32            | 1             | 2.596025                | 2.008780  | 3.416543  |
| 33            | 1             | 0.151790                | 1.447026  | 3.802865  |
| 34            | 1             | 0.301769                | 3.165349  | 3.527482  |
| 35            | 1             | -1.495825               | 3.079878  | 1.803252  |
| 36            | 1             | -2.018081               | 2.587531  | 3.408665  |
| 37            | 1             | -1.419130               | 0.126209  | 3.787788  |
| 38            | 1             | -3.140634               | 0.281864  | 3.533476  |
| 39            | 1             | -3.074230               | -1.503665 | 1.791949  |
| 40            | 1             | -2.573507               | -2.038129 | 3.390094  |
| 41            | 1             | -0.311458               | -3.364897 | 0.615682  |
| 42            | 1             | 3.399392                | -0.297151 | 0.666824  |
| 43            | 1             | 0.326064                | 3.379321  | 0.670183  |
| 44            | 1             | -3.373283               | 0.308034  | 0.673732  |
| 45            | 8             | -0.026260               | -0.159074 | -2.240518 |
| 46            | 1             | 0.626408                | -0.871873 | -2.365935 |
| 47            | 1             | -0.889184               | -0.585230 | -2.388590 |
| 48            | 7             | -3.306019               | 2.885371  | -0.785464 |
| 49            | 7             | 2.897794                | 3.300625  | -0.793233 |
| 50            | 7             | 3.344256                | -2.859035 | -0.822606 |
| 51            | 7             | -2.923275               | -3.277361 | -0.797545 |
| 52            | 1             | -4.271574               | 3.121088  | -0.503819 |
| 53            | 1             | 3.128676                | 4.270090  | -0.521237 |
| 54            | 1             | 4.301162                | -3.115576 | -0.526950 |
| 55            | 1             | -3.174257               | -4.238762 | -0.511762 |
| 56            | 6             | -3.706858               | -2.938554 | -1.978877 |

|    |    |           |           |           |
|----|----|-----------|-----------|-----------|
| 57 | 1  | -3.052483 | -2.715181 | -2.827696 |
| 58 | 6  | -2.988766 | 3.634464  | -1.994525 |
| 59 | 1  | -2.732734 | 2.955512  | -2.814121 |
| 60 | 6  | 3.648282  | 2.975678  | -1.999404 |
| 61 | 1  | 2.970446  | 2.710200  | -2.816935 |
| 62 | 6  | 3.031174  | -3.603821 | -2.035682 |
| 63 | 1  | 2.826924  | -2.921613 | -2.867349 |
| 64 | 1  | -4.329188 | -2.058065 | -1.790300 |
| 65 | 1  | -2.133703 | 4.297130  | -1.826138 |
| 66 | 1  | 4.314254  | 2.124713  | -1.823509 |
| 67 | 1  | 2.146400  | -4.230730 | -1.886802 |
| 68 | 6  | -4.259476 | 4.468416  | -2.351772 |
| 69 | 8  | -5.234063 | 4.330207  | -1.549501 |
| 70 | 8  | -4.175516 | 5.175898  | -3.380642 |
| 71 | 6  | 4.477466  | 4.246474  | -2.367557 |
| 72 | 8  | 4.333877  | 5.228046  | -1.574821 |
| 73 | 8  | 5.186800  | 4.155749  | -3.394588 |
| 74 | 6  | 4.280171  | -4.486454 | -2.352385 |
| 75 | 8  | 4.192450  | -5.209909 | -3.369314 |
| 76 | 8  | 5.243207  | -4.363332 | -1.533907 |
| 77 | 6  | -4.599516 | -4.181214 | -2.292972 |
| 78 | 8  | -4.453437 | -5.159356 | -1.496455 |
| 79 | 8  | -5.354292 | -4.073653 | -3.284871 |
| 80 | 6  | 1.980752  | 4.267146  | 1.727564  |
| 81 | 1  | 3.016085  | 4.054674  | 2.005858  |
| 82 | 1  | 1.971365  | 5.121392  | 1.045294  |
| 83 | 1  | 1.436822  | 4.578627  | 2.621752  |
| 84 | 6  | -4.263031 | 1.959043  | 1.734449  |
| 85 | 1  | -4.054842 | 2.996069  | 2.009639  |
| 86 | 1  | -5.120451 | 1.943845  | 1.056223  |
| 87 | 1  | -4.567255 | 1.415422  | 2.631382  |
| 88 | 6  | -1.946950 | -4.277208 | 1.681683  |
| 89 | 1  | -2.978386 | -4.073899 | 1.980651  |
| 90 | 1  | -1.944780 | -5.120910 | 0.986328  |
| 91 | 1  | -1.387040 | -4.599701 | 2.561802  |
| 92 | 6  | 4.289405  | -1.961200 | 1.708507  |
| 93 | 1  | 4.082517  | -3.002455 | 1.968423  |
| 94 | 1  | 5.149302  | -1.934276 | 1.033798  |
| 95 | 1  | 4.588929  | -1.429921 | 2.614217  |
| 96 | 63 | 0.009644  | 0.016577  | 0.304796  |

E(RTPSSh) = -2546.5959563 Hartree

Zero-point correction = 0.781668 Hartree/particle

Sum of electronic and thermal Energies = -2545.761098 Hartree

Sum of electronic and thermal Enthalpies = -2545.760154 Hartree

Sum of electronic and thermal Free Energies = -2545.905674 Hartree

**Table S52.** [Gd(DOTMA-(gly)<sub>4</sub>(H<sub>2</sub>O)]<sup>-</sup> [TSAP, Δ(δδδδ)], TPSSh/LCRECP/6-31G(d,p), aqueous solution (0 Imaginary Frequencies)

| Center Number | Atomic Number | Coordinates (Angstroms) |           |           |
|---------------|---------------|-------------------------|-----------|-----------|
|               |               | X                       | Y         | Z         |
| 1             | 7             | 1.004271                | -1.898560 | -1.936043 |
| 2             | 6             | 0.028477                | -2.236341 | -3.007393 |
| 3             | 6             | -1.416892               | -2.303715 | -2.525066 |
| 4             | 7             | -1.903672               | -1.015602 | -1.943989 |
| 5             | 6             | -2.216976               | -0.050783 | -3.032452 |
| 6             | 6             | -2.293629               | 1.399742  | -2.565699 |
| 7             | 7             | -1.015827               | 1.892029  | -1.964858 |
| 8             | 6             | -0.041163               | 2.219586  | -3.040526 |



|    |   |           |           |           |
|----|---|-----------|-----------|-----------|
| 9  | 6 | 1.405041  | 2.288364  | -2.560096 |
| 10 | 7 | 1.888231  | 1.007269  | -1.959633 |
| 11 | 6 | 2.206050  | 0.027492  | -3.032681 |
| 12 | 6 | 2.282332  | -1.415708 | -2.543757 |
| 13 | 6 | 1.274439  | -3.060102 | -1.026343 |
| 14 | 6 | 2.043079  | -2.499470 | 0.177190  |
| 15 | 8 | 1.817125  | -1.301430 | 0.547263  |
| 16 | 6 | -3.081486 | -1.268617 | -1.051655 |
| 17 | 6 | -2.545624 | -2.006156 | 0.181697  |
| 18 | 8 | -1.352581 | -1.777694 | 0.567871  |
| 19 | 6 | -1.287234 | 3.060069  | -1.064460 |
| 20 | 6 | -2.045180 | 2.502188  | 0.148902  |
| 21 | 8 | -1.836361 | 1.300476  | 0.508615  |
| 22 | 6 | 3.060631  | 1.272373  | -1.063512 |
| 23 | 6 | 2.510109  | 2.027789  | 0.153813  |
| 24 | 8 | 1.313828  | 1.809769  | 0.526486  |
| 25 | 1 | 0.127788  | -1.475071 | -3.783776 |
| 26 | 1 | 0.275484  | -3.190347 | -3.489017 |
| 27 | 1 | -1.519933 | -3.079349 | -1.761408 |
| 28 | 1 | -2.042939 | -2.610129 | -3.373295 |
| 29 | 1 | -1.437023 | -0.157815 | -3.789248 |
| 30 | 1 | -3.159913 | -0.302559 | -3.533448 |
| 31 | 1 | -3.084362 | 1.510473  | -1.819133 |
| 32 | 1 | -2.582630 | 2.017715  | -3.425795 |
| 33 | 1 | -0.142744 | 1.452428  | -3.811045 |
| 34 | 1 | -0.286995 | 3.170564  | -3.528978 |
| 35 | 1 | 1.511006  | 3.074947  | -1.808201 |
| 36 | 1 | 2.031747  | 2.579872  | -3.413116 |
| 37 | 1 | 1.429536  | 0.122663  | -3.794560 |
| 38 | 1 | 3.151092  | 0.272182  | -3.533355 |
| 39 | 1 | 3.072622  | -1.514629 | -1.794835 |
| 40 | 1 | 2.572556  | -2.046883 | -3.393846 |
| 41 | 1 | 0.300749  | -3.364694 | -0.623968 |
| 42 | 1 | -3.394799 | -0.286894 | -0.677527 |
| 43 | 1 | -0.312592 | 3.375554  | -0.673284 |
| 44 | 1 | 3.374002  | 0.296272  | -0.674877 |
| 45 | 8 | 0.024108  | -0.141880 | 2.207017  |
| 46 | 1 | -0.625595 | -0.857842 | 2.330175  |
| 47 | 1 | 0.888840  | -0.566743 | 2.349089  |
| 48 | 7 | 3.297595  | 2.862701  | 0.798083  |
| 49 | 7 | -2.874197 | 3.289373  | 0.801221  |
| 50 | 7 | -3.336883 | -2.833206 | 0.828529  |
| 51 | 7 | 2.894669  | -3.273974 | 0.812609  |
| 52 | 1 | 4.267300  | 3.094602  | 0.527749  |
| 53 | 1 | -3.099246 | 4.263344  | 0.540690  |
| 54 | 1 | -4.299107 | -3.082371 | 0.543750  |
| 55 | 1 | 3.141748  | -4.239487 | 0.537110  |
| 56 | 6 | 3.669877  | -2.931333 | 1.998432  |
| 57 | 1 | 3.009551  | -2.700028 | 2.840556  |
| 58 | 6 | 2.971772  | 3.607790  | 2.007357  |
| 59 | 1 | 2.704226  | 2.926386  | 2.821233  |
| 60 | 6 | -3.621985 | 2.956999  | 2.007061  |
| 61 | 1 | -2.942682 | 2.678470  | 2.819025  |
| 62 | 6 | -3.021304 | -3.570442 | 2.045603  |
| 63 | 1 | -2.801722 | -2.883188 | 2.869145  |
| 64 | 1 | 4.298074  | -2.055065 | 1.809893  |
| 65 | 1 | 2.121777  | 4.275554  | 1.833566  |
| 66 | 1 | -4.294657 | 2.112583  | 1.825245  |
| 67 | 1 | -2.145475 | -4.209337 | 1.894821  |
| 68 | 6 | 4.243028  | 4.433638  | 2.381288  |
| 69 | 8 | 5.225028  | 4.293917  | 1.588361  |
| 70 | 8 | 4.152226  | 5.136883  | 3.412488  |

|    |    |           |           |           |
|----|----|-----------|-----------|-----------|
| 71 | 6  | -4.440690 | 4.229710  | 2.391848  |
| 72 | 8  | -4.292581 | 5.218812  | 1.609365  |
| 73 | 8  | -5.147325 | 4.132869  | 3.420184  |
| 74 | 6  | -4.277805 | -4.435106 | 2.381857  |
| 75 | 8  | -4.190560 | -5.147580 | 3.406521  |
| 76 | 8  | -5.245390 | -4.310613 | 1.568959  |
| 77 | 6  | 4.553404  | -4.176580 | 2.327934  |
| 78 | 8  | 4.406673  | -5.160021 | 1.538069  |
| 79 | 8  | 5.300827  | -4.066305 | 3.325047  |
| 80 | 6  | -1.970043 | 4.266827  | -1.723716 |
| 81 | 1  | -3.006168 | 4.055265  | -1.999705 |
| 82 | 1  | -1.958758 | 5.118912  | -1.038788 |
| 83 | 1  | -1.428464 | 4.580909  | -2.618479 |
| 84 | 6  | 4.267763  | 1.951297  | -1.725933 |
| 85 | 1  | 4.060645  | 2.989399  | -1.997798 |
| 86 | 1  | 5.122577  | 1.933452  | -1.044494 |
| 87 | 1  | 4.575148  | 1.411025  | -2.623862 |
| 88 | 6  | 1.943454  | -4.278538 | -1.677802 |
| 89 | 1  | 2.977496  | -4.076086 | -1.968108 |
| 90 | 1  | 1.934910  | -5.121674 | -0.981820 |
| 91 | 1  | 1.390650  | -4.601174 | -2.562388 |
| 92 | 6  | -4.285500 | -1.955245 | -1.712007 |
| 93 | 1  | -4.078967 | -2.997839 | -1.966697 |
| 94 | 1  | -5.145043 | -1.924796 | -1.037018 |
| 95 | 1  | -4.585220 | -1.428308 | -2.620243 |
| 96 | 64 | -0.008244 | 0.015899  | -0.333447 |

E(RTPSSh) = -2547.1861739 Hartree

Zero-point correction = 0.781926 Hartree/particle

Sum of electronic and thermal Energies = -2546.351198 Hartree

Sum of electronic and thermal Enthalpies = -2546.350253 Hartree

Sum of electronic and thermal Free Energies = -2546.495205 Hartree

**Table S53.** [Tb(DOTMA-(gly)<sub>4</sub>(H<sub>2</sub>O)]<sup>-</sup> [TSAP, Δ(δδδδ)], TPSSh/LCRECP/6-31G(d,p), aqueous solution (0 Imaginary Frequencies)

| Center Number | Atomic Number | Coordinates (Angstroms) |           |           |
|---------------|---------------|-------------------------|-----------|-----------|
|               |               | X                       | Y         | Z         |
| 1             | 7             | 0.987420                | -1.901001 | -1.939571 |
| 2             | 6             | 0.012399                | -2.239763 | -3.010797 |
| 3             | 6             | -1.431718               | -2.298918 | -2.527162 |
| 4             | 7             | -1.905882               | -1.006087 | -1.947920 |
| 5             | 6             | -2.217982               | -0.044537 | -3.039015 |
| 6             | 6             | -2.287099               | 1.406032  | -2.574414 |
| 7             | 7             | -1.005318               | 1.888103  | -1.975249 |
| 8             | 6             | -0.032439               | 2.213112  | -3.052775 |
| 9             | 6             | 1.412972                | 2.274178  | -2.572015 |
| 10            | 7             | 1.883785                | 0.990112  | -1.969454 |
| 11            | 6             | 2.199574                | 0.009616  | -3.041906 |
| 12            | 6             | 2.268794                | -1.431593 | -2.549313 |
| 13            | 6             | 1.250305                | -3.061185 | -1.025547 |
| 14            | 6             | 2.019733                | -2.499264 | 0.176125  |
| 15            | 8             | 1.798851                | -1.298113 | 0.539573  |
| 16            | 6             | -3.083388               | -1.249567 | -1.052173 |
| 17            | 6             | -2.547538               | -1.984485 | 0.182073  |
| 18            | 8             | -1.352049               | -1.759405 | 0.563387  |
| 19            | 6             | -1.268785               | 3.058060  | -1.074467 |
| 20            | 6             | -2.024071               | 2.503650  | 0.141489  |
| 21            | 8             | -1.822459               | 1.299291  | 0.496992  |
| 22            | 6             | 3.057430                | 1.248755  | -1.072453 |

|    |   |           |           |           |
|----|---|-----------|-----------|-----------|
| 23 | 6 | 2.509410  | 2.005055  | 0.144723  |
| 24 | 8 | 1.310515  | 1.794087  | 0.513663  |
| 25 | 1 | 0.114861  | -1.482318 | -3.790483 |
| 26 | 1 | 0.256758  | -3.196581 | -3.488104 |
| 27 | 1 | -1.538555 | -3.072536 | -1.761958 |
| 28 | 1 | -2.062010 | -2.602225 | -3.373320 |
| 29 | 1 | -1.440191 | -0.156920 | -3.797285 |
| 30 | 1 | -3.162960 | -0.294537 | -3.537028 |
| 31 | 1 | -3.076376 | 1.521984  | -1.827083 |
| 32 | 1 | -2.572714 | 2.025949  | -3.434184 |
| 33 | 1 | -0.138419 | 1.447856  | -3.824619 |
| 34 | 1 | -0.275318 | 3.165893  | -3.539139 |
| 35 | 1 | 1.523338  | 3.060869  | -1.820825 |
| 36 | 1 | 2.043526  | 2.559887  | -3.424109 |
| 37 | 1 | 1.424779  | 0.106989  | -3.805258 |
| 38 | 1 | 3.146266  | 0.250806  | -3.541111 |
| 39 | 1 | 3.058820  | -1.532880 | -1.800407 |
| 40 | 1 | 2.554050  | -2.068449 | -3.396801 |
| 41 | 1 | 0.274858  | -3.359888 | -0.623503 |
| 42 | 1 | -3.391352 | -0.265189 | -0.681122 |
| 43 | 1 | -0.291735 | 3.370411  | -0.687273 |
| 44 | 1 | 3.366571  | 0.271177  | -0.684665 |
| 45 | 8 | 0.021147  | -0.122149 | 2.188347  |
| 46 | 1 | -0.625862 | -0.838791 | 2.320046  |
| 47 | 1 | 0.887015  | -0.540964 | 2.339572  |
| 48 | 7 | 3.299859  | 2.833597  | 0.793159  |
| 49 | 7 | -2.843572 | 3.294765  | 0.800675  |
| 50 | 7 | -3.339603 | -2.805924 | 0.834671  |
| 51 | 7 | 2.867148  | -3.274043 | 0.816433  |
| 52 | 1 | 4.272857  | 3.057877  | 0.528121  |
| 53 | 1 | -3.061268 | 4.271925  | 0.545785  |
| 54 | 1 | -4.304585 | -3.050703 | 0.555204  |
| 55 | 1 | 3.109125  | -4.242574 | 0.546836  |
| 56 | 6 | 3.641609  | -2.929801 | 2.002258  |
| 57 | 1 | 2.980653  | -2.690162 | 2.841533  |
| 58 | 6 | 2.976408  | 3.574175  | 2.005846  |
| 59 | 1 | 2.695965  | 2.890274  | 2.813197  |
| 60 | 6 | -3.582632 | 2.965744  | 2.012813  |
| 61 | 1 | -2.898141 | 2.674014  | 2.815662  |
| 62 | 6 | -3.024359 | -3.537394 | 2.055285  |
| 63 | 1 | -2.794897 | -2.846329 | 2.872869  |
| 64 | 1 | 4.275554  | -2.058382 | 1.810671  |
| 65 | 1 | 2.135584  | 4.253492  | 1.832155  |
| 66 | 1 | -4.268202 | 2.131090  | 1.833999  |
| 67 | 1 | -2.154801 | -4.184859 | 1.904806  |
| 68 | 6 | 4.255596  | 4.381813  | 2.392287  |
| 69 | 8 | 5.239333  | 4.237275  | 1.602349  |
| 70 | 8 | 4.168540  | 5.077390  | 3.428987  |
| 71 | 6 | -4.380546 | 4.246937  | 2.412785  |
| 72 | 8 | -4.230273 | 5.237101  | 1.632019  |
| 73 | 8 | -5.074910 | 4.154973  | 3.449892  |
| 74 | 6 | -4.286701 | -4.388776 | 2.403442  |
| 75 | 8 | -4.201462 | -5.093515 | 3.433583  |
| 76 | 8 | -5.256319 | -4.262756 | 1.593167  |
| 77 | 6 | 4.516471  | -4.178889 | 2.340355  |
| 78 | 8 | 4.364130  | -5.166036 | 1.556162  |
| 79 | 8 | 5.263217  | -4.067756 | 3.337852  |
| 80 | 6 | -1.950177 | 4.267169  | -1.731070 |
| 81 | 1 | -2.988659 | 4.059819  | -2.001243 |
| 82 | 1 | -1.931654 | 5.119510  | -1.046628 |
| 83 | 1 | -1.412200 | 4.578656  | -2.628911 |
| 84 | 6 | 4.268124  | 1.923519  | -1.732727 |

|    |    |           |           |           |
|----|----|-----------|-----------|-----------|
| 85 | 1  | 4.066337  | 2.963308  | -2.002042 |
| 86 | 1  | 5.122277  | 1.899794  | -1.050644 |
| 87 | 1  | 4.573716  | 1.384057  | -2.631766 |
| 88 | 6  | 1.914973  | -4.285219 | -1.671000 |
| 89 | 1  | 2.950624  | -4.088951 | -1.959736 |
| 90 | 1  | 1.900779  | -5.125459 | -0.971621 |
| 91 | 1  | 1.362687  | -4.608892 | -2.555525 |
| 92 | 6  | -4.292291 | -1.933465 | -1.706445 |
| 93 | 1  | -4.091606 | -2.978236 | -1.956799 |
| 94 | 1  | -5.149838 | -1.895629 | -1.029293 |
| 95 | 1  | -4.591918 | -1.409340 | -2.616341 |
| 96 | 65 | -0.010325 | 0.016241  | -0.336397 |

E(RTPSSh) = -2547.7756483 Hartree

Zero-point correction = 0.781873 Hartree/particle

Sum of electronic and thermal Energies = -2546.940698 Hartree

Sum of electronic and thermal Enthalpies = -2546.939754 Hartree

Sum of electronic and thermal Free Energies = -2547.084962 Hartree

**Table S54.** [Dy(DOTMA-(gly)<sub>4</sub>(H<sub>2</sub>O)]<sup>-</sup> [TSAP, Δ(δδδδ)], TPSSh/LCRECP/6-31G(d,p), aqueous solution (0 Imaginary Frequencies)

| Center Number | Atomic Number | Coordinates (Angstroms) |           |           |
|---------------|---------------|-------------------------|-----------|-----------|
|               |               | X                       | Y         | Z         |
| 1             | 7             | 0.963223                | -1.918700 | -1.948641 |
| 2             | 6             | -0.011133               | -2.248593 | -3.023373 |
| 3             | 6             | -1.457079               | -2.282927 | -2.543986 |
| 4             | 7             | -1.909270               | -0.980935 | -1.966850 |
| 5             | 6             | -2.205140               | -0.016081 | -3.060096 |
| 6             | 6             | -2.256673               | 1.434394  | -2.593633 |
| 7             | 7             | -0.969152               | 1.896273  | -1.990466 |
| 8             | 6             | 0.008556                | 2.212677  | -3.066366 |
| 9             | 6             | 1.453378                | 2.248699  | -2.582140 |
| 10            | 7             | 1.898963                | 0.955716  | -1.978745 |
| 11            | 6             | 2.203596                | -0.028542 | -3.051140 |
| 12            | 6             | 2.253263                | -1.469345 | -2.555519 |
| 13            | 6             | 1.206970                | -3.079286 | -1.030183 |
| 14            | 6             | 1.973370                | -2.521204 | 0.174405  |
| 15            | 8             | 1.768579                | -1.313510 | 0.525546  |
| 16            | 6             | -3.092249               | -1.205130 | -1.073586 |
| 17            | 6             | -2.567206               | -1.936073 | 0.167249  |
| 18            | 8             | -1.364548               | -1.734617 | 0.539416  |
| 19            | 6             | -1.218208               | 3.068081  | -1.088310 |
| 20            | 6             | -1.973774               | 2.518928  | 0.129404  |
| 21            | 8             | -1.798854               | 1.306000  | 0.469208  |
| 22            | 6             | 3.073420                | 1.195453  | -1.077505 |
| 23            | 6             | 2.528770                | 1.953190  | 0.139551  |
| 24            | 8             | 1.322668                | 1.761919  | 0.495269  |
| 25            | 1             | 0.105892                | -1.496411 | -3.805603 |
| 26            | 1             | 0.221442                | -3.211207 | -3.494936 |
| 27            | 1             | -1.578469               | -3.053179 | -1.777659 |
| 28            | 1             | -2.091630               | -2.575650 | -3.390485 |
| 29            | 1             | -1.426242               | -0.138549 | -3.815855 |
| 30            | 1             | -3.151646               | -0.254738 | -3.560833 |
| 31            | 1             | -3.045748               | 1.559043  | -1.847641 |
| 32            | 1             | -2.530905               | 2.061050  | -3.452040 |
| 33            | 1             | -0.108018               | 1.454058  | -3.843079 |
| 34            | 1             | -0.220134               | 3.171938  | -3.546897 |
| 35            | 1             | 1.574821                | 3.032352  | -1.829582 |
| 36            | 1             | 2.092509                | 2.523429  | -3.431274 |

|    |    |           |           |           |
|----|----|-----------|-----------|-----------|
| 37 | 1  | 1.431117  | 0.078061  | -3.815531 |
| 38 | 1  | 3.153919  | 0.200832  | -3.549114 |
| 39 | 1  | 3.039291  | -1.579015 | -1.803696 |
| 40 | 1  | 2.531594  | -2.113106 | -3.399881 |
| 41 | 1  | 0.225636  | -3.367300 | -0.634970 |
| 42 | 1  | -3.392284 | -0.215168 | -0.711480 |
| 43 | 1  | -0.237115 | 3.372855  | -0.705827 |
| 44 | 1  | 3.370146  | 0.212977  | -0.692767 |
| 45 | 8  | 0.012785  | -0.106473 | 2.157081  |
| 46 | 1  | -0.640222 | -0.817656 | 2.287971  |
| 47 | 1  | 0.874732  | -0.532149 | 2.310740  |
| 48 | 66 | -0.009020 | 0.012938  | -0.362202 |
| 49 | 7  | 3.327739  | 2.763426  | 0.800420  |
| 50 | 7  | -2.767250 | 3.322497  | 0.805137  |
| 51 | 7  | -3.375324 | -2.729287 | 0.834753  |
| 52 | 7  | 2.801609  | -3.304236 | 0.829416  |
| 53 | 1  | 4.308703  | 2.967834  | 0.548865  |
| 54 | 1  | -2.960389 | 4.308490  | 0.565043  |
| 55 | 1  | -4.349931 | -2.948209 | 0.567406  |
| 56 | 1  | 3.024239  | -4.281761 | 0.575671  |
| 57 | 6  | 3.563212  | -2.965697 | 2.025199  |
| 58 | 1  | 2.894172  | -2.691472 | 2.847147  |
| 59 | 6  | 3.007333  | 3.500939  | 2.015846  |
| 60 | 1  | 2.700851  | 2.817029  | 2.813636  |
| 61 | 6  | -3.501125 | 2.999203  | 2.021973  |
| 62 | 1  | -2.816379 | 2.675760  | 2.812302  |
| 63 | 6  | -3.074968 | -3.445573 | 2.068069  |
| 64 | 1  | -2.810276 | -2.746319 | 2.867710  |
| 65 | 1  | 4.228922  | -2.118306 | 1.833077  |
| 66 | 1  | 2.185378  | 4.202070  | 1.838416  |
| 67 | 1  | -4.214078 | 2.188331  | 1.840426  |
| 68 | 1  | -2.232694 | -4.129523 | 1.923367  |
| 69 | 6  | 4.301256  | 4.273667  | 2.424096  |
| 70 | 8  | 5.290564  | 4.110426  | 1.644774  |
| 71 | 8  | 4.219057  | 4.963110  | 3.465229  |
| 72 | 6  | -4.255113 | 4.298406  | 2.448359  |
| 73 | 8  | -4.081331 | 5.294842  | 1.680490  |
| 74 | 8  | -4.942432 | 4.212662  | 3.490637  |
| 75 | 6  | -4.365032 | -4.240664 | 2.447223  |
| 76 | 8  | -4.298010 | -4.920299 | 3.495403  |
| 77 | 8  | -5.335232 | -4.100965 | 1.639852  |
| 78 | 6  | 4.391085  | -4.236358 | 2.399219  |
| 79 | 8  | 4.224417  | -5.229137 | 1.624962  |
| 80 | 8  | 5.119356  | -4.134337 | 3.411175  |
| 81 | 6  | -1.893601 | 4.282761  | -1.741708 |
| 82 | 1  | -2.935914 | 4.084566  | -2.003681 |
| 83 | 1  | -1.862333 | 5.135856  | -1.058708 |
| 84 | 1  | -1.359386 | 4.588248  | -2.643947 |
| 85 | 6  | 4.293836  | 1.859627  | -1.730838 |
| 86 | 1  | 4.104367  | 2.902494  | -1.997093 |
| 87 | 1  | 5.145013  | 1.824377  | -1.045537 |
| 88 | 1  | 4.597226  | 1.319945  | -2.630541 |
| 89 | 6  | 1.864935  | -4.311275 | -1.667561 |
| 90 | 1  | 2.904662  | -4.125593 | -1.948493 |
| 91 | 1  | 1.837337  | -5.149589 | -0.966265 |
| 92 | 1  | 1.316375  | -4.631848 | -2.555588 |
| 93 | 6  | -4.305519 | -1.883013 | -1.726702 |
| 94 | 1  | -4.115011 | -2.932502 | -1.964813 |
| 95 | 1  | -5.165899 | -1.828852 | -1.054300 |
| 96 | 1  | -4.595201 | -1.365223 | -2.643507 |

---

E(RTPSSh) = -2548.3617554 Hartree

Zero-point correction = 0.781867 Hartree/particle  
Sum of electronic and thermal Energies = -2547.526848 Hartree  
Sum of electronic and thermal Enthalpies = -2547.525903 Hartree  
Sum of electronic and thermal Free Energies = -2547.670990 Hartree

**Table S55.** [Ho(DOTMA-(gly)<sub>4</sub>(H<sub>2</sub>O)]<sup>-</sup> [TSAP, Δ(δδδδ)], TPSSh/LCRECP/6-31G(d,p), aqueous solution (0 Imaginary Frequencies)

| Center Number | Atomic Number | Coordinates (Angstroms) |           |           |
|---------------|---------------|-------------------------|-----------|-----------|
|               |               | X                       | Y         | Z         |
| 1             | 7             | 0.982834                | -1.896760 | -1.945957 |
| 2             | 6             | 0.012559                | -2.240717 | -3.019174 |
| 3             | 6             | -1.431155               | -2.296584 | -2.536809 |
| 4             | 7             | -1.898352               | -1.001796 | -1.956728 |
| 5             | 6             | -2.215245               | -0.043441 | -3.048646 |
| 6             | 6             | -2.281281               | 1.406167  | -2.583343 |
| 7             | 7             | -0.997465               | 1.880931  | -1.982983 |
| 8             | 6             | -0.027722               | 2.210730  | -3.061343 |
| 9             | 6             | 1.416758                | 2.268607  | -2.580080 |
| 10            | 7             | 1.880032                | 0.982674  | -1.976034 |
| 11            | 6             | 2.201576                | 0.005068  | -3.048828 |
| 12            | 6             | 2.267059                | -1.435062 | -2.555116 |
| 13            | 6             | 1.242045                | -3.052010 | -1.025256 |
| 14            | 6             | 2.004615                | -2.479047 | 0.174383  |
| 15            | 8             | 1.784089                | -1.272362 | 0.520060  |
| 16            | 6             | -3.071367               | -1.243627 | -1.055438 |
| 17            | 6             | -2.524414               | -1.971957 | 0.176795  |
| 18            | 8             | -1.323174               | -1.747843 | 0.541156  |
| 19            | 6             | -1.258871               | 3.046356  | -1.076141 |
| 20            | 6             | -2.008952               | 2.480586  | 0.136804  |
| 21            | 8             | -1.808430               | 1.271006  | 0.474908  |
| 22            | 6             | 3.048501                | 1.239653  | -1.072374 |
| 23            | 6             | 2.488090                | 1.990450  | 0.141493  |
| 24            | 8             | 1.283761                | 1.779706  | 0.492607  |
| 25            | 1             | 0.116910                | -1.486329 | -3.801625 |
| 26            | 1             | 0.258676                | -3.199637 | -3.491379 |
| 27            | 1             | -1.540534               | -3.070543 | -1.772346 |
| 28            | 1             | -2.063462               | -2.596465 | -3.382593 |
| 29            | 1             | -1.440164               | -0.156693 | -3.809625 |
| 30            | 1             | -3.162317               | -0.294437 | -3.542214 |
| 31            | 1             | -3.070701               | 1.523488  | -1.836429 |
| 32            | 1             | -2.563788               | 2.029064  | -3.441894 |
| 33            | 1             | -0.134621               | 1.448217  | -3.835833 |
| 34            | 1             | -0.271695               | 3.165509  | -3.543230 |
| 35            | 1             | 1.528694                | 3.055664  | -1.829555 |
| 36            | 1             | 2.050231                | 2.550873  | -3.431068 |
| 37            | 1             | 1.430238                | 0.103111  | -3.815643 |
| 38            | 1             | 3.150822                | 0.247157  | -3.542745 |
| 39            | 1             | 3.056214                | -1.537585 | -1.805509 |
| 40            | 1             | 2.550324                | -2.075172 | -3.400734 |
| 41            | 1             | 0.265580                | -3.349650 | -0.625606 |
| 42            | 1             | -3.380046               | -0.259054 | -0.686286 |
| 43            | 1             | -0.281497               | 3.358206  | -0.690163 |
| 44            | 1             | 3.357434                | 0.261886  | -0.685687 |
| 45            | 8             | 0.020443                | -0.097553 | 2.150583  |
| 46            | 1             | -0.617726               | -0.821390 | 2.285346  |
| 47            | 1             | 0.891173                | -0.506419 | 2.300914  |
| 48            | 7             | 3.270636                | 2.814924  | 0.804193  |
| 49            | 7             | -2.823986               | 3.264446  | 0.809713  |
| 50            | 7             | -3.310210               | -2.787127 | 0.844178  |

|    |    |           |           |           |
|----|----|-----------|-----------|-----------|
| 51 | 7  | 2.846346  | -3.246895 | 0.829865  |
| 52 | 1  | 4.247711  | 3.038248  | 0.553470  |
| 53 | 1  | -3.040368 | 4.245383  | 0.568395  |
| 54 | 1  | -4.279634 | -3.030152 | 0.578337  |
| 55 | 1  | 3.087501  | -4.219551 | 0.574173  |
| 56 | 6  | 3.615599  | -2.890042 | 2.015456  |
| 57 | 1  | 2.951108  | -2.639775 | 2.848794  |
| 58 | 6  | 2.932657  | 3.551279  | 2.015564  |
| 59 | 1  | 2.640433  | 2.864729  | 2.816441  |
| 60 | 6  | -3.559621 | 2.921687  | 2.020186  |
| 61 | 1  | -2.873031 | 2.618960  | 2.817120  |
| 62 | 6  | -2.983793 | -3.511264 | 2.066284  |
| 63 | 1  | -2.741104 | -2.815468 | 2.875958  |
| 64 | 1  | 4.252197  | -2.022175 | 1.816901  |
| 65 | 1  | 2.095562  | 4.232994  | 1.833606  |
| 66 | 1  | -4.247296 | 2.090566  | 1.833325  |
| 67 | 1  | -2.119610 | -4.164540 | 1.910207  |
| 68 | 6  | 4.208483  | 4.354647  | 2.421789  |
| 69 | 8  | 5.202366  | 4.210163  | 1.644599  |
| 70 | 8  | 4.109234  | 5.046886  | 3.459601  |
| 71 | 6  | -4.353765 | 4.199433  | 2.438496  |
| 72 | 8  | -4.202807 | 5.199291  | 1.670286  |
| 73 | 8  | -5.045880 | 4.095620  | 3.475963  |
| 74 | 6  | -4.246608 | -4.353162 | 2.435749  |
| 75 | 8  | -4.153703 | -5.049211 | 3.471057  |
| 76 | 8  | -5.224274 | -4.228998 | 1.634869  |
| 77 | 6  | 4.486019  | -4.137127 | 2.372375  |
| 78 | 8  | 4.333826  | -5.133494 | 1.599855  |
| 79 | 8  | 5.228998  | -4.015608 | 3.371402  |
| 80 | 6  | -1.945138 | 4.257587  | -1.723513 |
| 81 | 1  | -2.984089 | 4.049933  | -1.991592 |
| 82 | 1  | -1.926132 | 5.105917  | -1.034113 |
| 83 | 1  | -1.410422 | 4.575165  | -2.621207 |
| 84 | 6  | 4.261484  | 1.919846  | -1.722652 |
| 85 | 1  | 4.059146  | 2.960112  | -1.989656 |
| 86 | 1  | 5.111341  | 1.895747  | -1.035230 |
| 87 | 1  | 4.573744  | 1.383965  | -2.621574 |
| 88 | 6  | 1.912251  | -4.278561 | -1.659964 |
| 89 | 1  | 2.948999  | -4.082372 | -1.944739 |
| 90 | 1  | 1.896013  | -5.114608 | -0.955617 |
| 91 | 1  | 1.364678  | -4.608276 | -2.545215 |
| 92 | 6  | -4.281574 | -1.933883 | -1.700501 |
| 93 | 1  | -4.079649 | -2.979317 | -1.947022 |
| 94 | 1  | -5.135898 | -1.895059 | -1.019346 |
| 95 | 1  | -4.586673 | -1.414460 | -2.611311 |
| 96 | 67 | -0.009968 | 0.016223  | -0.358846 |

E(RTPSSh) = -2548.9457093 Hartree

Zero-point correction = 0.782121 Hartree/particle

Sum of electronic and thermal Energies = -2548.110619 Hartree

Sum of electronic and thermal Enthalpies = -2548.109675 Hartree

Sum of electronic and thermal Free Energies = -2548.254636 Hartree

**Table S56.** [Tm(DOTMA-(gly)<sub>4</sub>(H<sub>2</sub>O))<sup>-</sup>] [TSAP, Δ(δδδδ)], TPSSh/LCRECP/6-31G(d,p), aqueous solution (0 Imaginary Frequencies)

| Center Number | Atomic Number | Coordinates (Angstroms) |           |           |
|---------------|---------------|-------------------------|-----------|-----------|
|               |               | X                       | Y         | Z         |
| 1             | 7             | 0.921450                | -1.915423 | -1.961735 |
| 2             | 6             | -0.055751               | -2.236628 | -3.035756 |

|    |   |           |           |           |
|----|---|-----------|-----------|-----------|
| 3  | 6 | -1.499120 | -2.246174 | -2.552251 |
| 4  | 7 | -1.919367 | -0.937130 | -1.968567 |
| 5  | 6 | -2.216536 | 0.029729  | -3.058761 |
| 6  | 6 | -2.236805 | 1.478219  | -2.588859 |
| 7  | 7 | -0.937056 | 1.906884  | -1.988752 |
| 8  | 6 | 0.037964  | 2.217055  | -3.068497 |
| 9  | 6 | 1.483118  | 2.227689  | -2.588527 |
| 10 | 7 | 1.902277  | 0.925477  | -1.987579 |
| 11 | 6 | 2.200120  | -0.056489 | -3.063456 |
| 12 | 6 | 2.220395  | -1.497437 | -2.570866 |
| 13 | 6 | 1.146615  | -3.075486 | -1.038023 |
| 14 | 6 | 1.915280  | -2.515942 | 0.162982  |
| 15 | 8 | 1.734906  | -1.297393 | 0.489722  |
| 16 | 6 | -3.094539 | -1.145727 | -1.061396 |
| 17 | 6 | -2.556417 | -1.884074 | 0.167733  |
| 18 | 8 | -1.342613 | -1.699013 | 0.512141  |
| 19 | 6 | -1.162274 | 3.074637  | -1.074776 |
| 20 | 6 | -1.917904 | 2.518129  | 0.138055  |
| 21 | 8 | -1.756620 | 1.296959  | 0.454052  |
| 22 | 6 | 3.075819  | 1.145385  | -1.080638 |
| 23 | 6 | 2.528460  | 1.899913  | 0.135782  |
| 24 | 8 | 1.313062  | 1.727485  | 0.468591  |
| 25 | 1 | 0.071428  | -1.489482 | -3.821935 |
| 26 | 1 | 0.163004  | -3.204823 | -3.502384 |
| 27 | 1 | -1.632812 | -3.017139 | -1.788586 |
| 28 | 1 | -2.143839 | -2.522501 | -3.396561 |
| 29 | 1 | -1.450549 | -0.105007 | -3.825607 |
| 30 | 1 | -3.174031 | -0.193979 | -3.545123 |
| 31 | 1 | -3.020187 | 1.616967  | -1.839278 |
| 32 | 1 | -2.500352 | 2.114697  | -3.443333 |
| 33 | 1 | -0.093346 | 1.464290  | -3.848901 |
| 34 | 1 | -0.179708 | 3.182514  | -3.541450 |
| 35 | 1 | 1.620240  | 3.008279  | -1.835434 |
| 36 | 1 | 2.126558  | 2.490820  | -3.438001 |
| 37 | 1 | 1.435121  | 0.066299  | -3.833275 |
| 38 | 1 | 3.158263  | 0.159880  | -3.551981 |
| 39 | 1 | 3.005040  | -1.624446 | -1.820270 |
| 40 | 1 | 2.482699  | -2.147883 | -3.415186 |
| 41 | 1 | 0.161340  | -3.350023 | -0.644288 |
| 42 | 1 | -3.377515 | -0.153085 | -0.694071 |
| 43 | 1 | -0.175169 | 3.361227  | -0.694907 |
| 44 | 1 | 3.360954  | 0.157583  | -0.702105 |
| 45 | 8 | 0.019206  | -0.078550 | 2.111548  |
| 46 | 1 | -0.626046 | -0.795822 | 2.246731  |
| 47 | 1 | 0.885129  | -0.496845 | 2.262322  |
| 48 | 7 | 3.330033  | 2.689096  | 0.818310  |
| 49 | 7 | -2.698535 | 3.318492  | 0.831904  |
| 50 | 7 | -3.358617 | -2.668741 | 0.851692  |
| 51 | 7 | 2.721988  | -3.303817 | 0.838315  |
| 52 | 1 | 4.316977  | 2.882395  | 0.582102  |
| 53 | 1 | -2.884853 | 4.309394  | 0.607237  |
| 54 | 1 | -4.340106 | -2.879246 | 0.602859  |
| 55 | 1 | 2.927941  | -4.289179 | 0.601466  |
| 56 | 6 | 3.487159  | -2.958136 | 2.029864  |
| 57 | 1 | 2.820717  | -2.665554 | 2.847668  |
| 58 | 6 | 3.000635  | 3.423091  | 2.033500  |
| 59 | 1 | 2.677558  | 2.737653  | 2.823387  |
| 60 | 6 | -3.435359 | 2.980366  | 2.042982  |
| 61 | 1 | -2.752305 | 2.646274  | 2.830342  |
| 62 | 6 | -3.038106 | -3.396482 | 2.073279  |
| 63 | 1 | -2.758157 | -2.704759 | 2.874348  |
| 64 | 1 | 4.162519  | -2.121161 | 1.826948  |



|    |    |           |           |           |
|----|----|-----------|-----------|-----------|
| 65 | 1  | 2.187347  | 4.132419  | 1.849163  |
| 66 | 1  | -4.148495 | 2.172511  | 1.849666  |
| 67 | 1  | -2.200126 | -4.080829 | 1.907895  |
| 68 | 6  | 4.295735  | 4.181838  | 2.463648  |
| 69 | 8  | 5.294765  | 4.013015  | 1.698109  |
| 70 | 8  | 4.204861  | 4.866998  | 3.506967  |
| 71 | 6  | -4.188350 | 4.274696  | 2.485557  |
| 72 | 8  | -4.011966 | 5.281373  | 1.731869  |
| 73 | 8  | -4.877113 | 4.175639  | 3.525767  |
| 74 | 6  | -4.323689 | -4.190923 | 2.468599  |
| 75 | 8  | -4.237986 | -4.884730 | 3.506024  |
| 76 | 8  | -5.309900 | -4.035528 | 1.683882  |
| 77 | 6  | 4.299146  | -4.233477 | 2.422574  |
| 78 | 8  | 4.116750  | -5.236893 | 1.665941  |
| 79 | 8  | 5.031541  | -4.124256 | 3.430816  |
| 80 | 6  | -1.825061 | 4.305216  | -1.710204 |
| 81 | 1  | -2.871292 | 4.124222  | -1.968802 |
| 82 | 1  | -1.778759 | 5.149341  | -1.016942 |
| 83 | 1  | -1.291557 | 4.614129  | -2.611695 |
| 84 | 6  | 4.305976  | 1.802799  | -1.722229 |
| 85 | 1  | 4.129330  | 2.850317  | -1.978569 |
| 86 | 1  | 5.153542  | 1.751169  | -1.033493 |
| 87 | 1  | 4.607085  | 1.268834  | -2.626168 |
| 88 | 6  | 1.793747  | -4.318367 | -1.665184 |
| 89 | 1  | 2.837704  | -4.147181 | -1.939165 |
| 90 | 1  | 1.750491  | -5.152873 | -0.960155 |
| 91 | 1  | 1.247633  | -4.636056 | -2.555784 |
| 92 | 6  | -4.324557 | -1.809187 | -1.697117 |
| 93 | 1  | -4.149428 | -2.860202 | -1.939984 |
| 94 | 1  | -5.173728 | -1.746815 | -1.011277 |
| 95 | 1  | -4.622308 | -1.286319 | -2.608463 |
| 96 | 69 | -0.008761 | 0.018839  | -0.389646 |

E(RTPSSh) = -2550.108215 Hartree

Zero-point correction = 0.782127 Hartree/particle

Sum of electronic and thermal Energies = -2549.273182 Hartree

Sum of electronic and thermal Enthalpies = -2549.272238 Hartree

Sum of electronic and thermal Free Energies = -2549.416688 Hartree

**Table S57.** [Yb(DOTMA-(gly)<sub>4</sub>(H<sub>2</sub>O)]<sup>-</sup> [TSAP, Δ(δδδδ)], TPSSh/LCRECP/6-31G(d,p), aqueous solution (0 Imaginary Frequencies)

| Center Number | Atomic Number | Coordinates (Angstroms) |           |           |
|---------------|---------------|-------------------------|-----------|-----------|
|               |               | X                       | Y         | Z         |
| 1             | 7             | 0.743136                | -1.973706 | -1.955866 |
| 2             | 6             | -0.256741               | -2.209884 | -3.029996 |
| 3             | 6             | -1.693306               | -2.098844 | -2.540867 |
| 4             | 7             | -1.990397               | -0.758514 | -1.953083 |
| 5             | 6             | -2.212566               | 0.228227  | -3.042882 |
| 6             | 6             | -2.106508               | 1.671291  | -2.570595 |
| 7             | 7             | -0.770019               | 1.976001  | -1.976899 |
| 8             | 6             | 0.218945                | 2.203040  | -3.063320 |
| 9             | 6             | 1.660384                | 2.091849  | -2.587878 |
| 10            | 7             | 1.960328                | 0.757394  | -1.987987 |
| 11            | 6             | 2.175175                | -0.243466 | -3.065060 |
| 12            | 6             | 2.073573                | -1.678548 | -2.567593 |
| 13            | 6             | 0.865148                | -3.147164 | -1.027967 |
| 14            | 6             | 1.685936                | -2.653190 | 0.167154  |
| 15            | 8             | 1.611927                | -1.421191 | 0.488699  |
| 16            | 6             | -3.173868               | -0.865461 | -1.036460 |

|    |   |           |           |           |
|----|---|-----------|-----------|-----------|
| 17 | 6 | -2.691861 | -1.658068 | 0.181820  |
| 18 | 8 | -1.463354 | -1.575258 | 0.517661  |
| 19 | 6 | -0.885125 | 3.155311  | -1.054986 |
| 20 | 6 | -1.690093 | 2.660985  | 0.153312  |
| 21 | 8 | -1.641935 | 1.426123  | 0.455595  |
| 22 | 6 | 3.148713  | 0.873744  | -1.079044 |
| 23 | 6 | 2.666650  | 1.675207  | 0.134882  |
| 24 | 8 | 1.438768  | 1.609095  | 0.462547  |
| 25 | 1 | -0.072511 | -1.470809 | -3.812947 |
| 26 | 1 | -0.117709 | -3.190279 | -3.502322 |
| 27 | 1 | -1.888003 | -2.857207 | -1.777468 |
| 28 | 1 | -2.365554 | -2.313651 | -3.381398 |
| 29 | 1 | -1.463588 | 0.034497  | -3.814245 |
| 30 | 1 | -3.187285 | 0.083437  | -3.525271 |
| 31 | 1 | -2.870759 | 1.874510  | -1.815969 |
| 32 | 1 | -2.314202 | 2.333180  | -3.420982 |
| 33 | 1 | 0.025015  | 1.460461  | -3.840925 |
| 34 | 1 | 0.077478  | 3.181464  | -3.539111 |
| 35 | 1 | 1.864092  | 2.857344  | -1.834204 |
| 36 | 1 | 2.324951  | 2.295609  | -3.437177 |
| 37 | 1 | 1.421585  | -0.062124 | -3.835244 |
| 38 | 1 | 3.147125  | -0.106455 | -3.555476 |
| 39 | 1 | 2.844722  | -1.868527 | -1.816062 |
| 40 | 1 | 2.274212  | -2.355219 | -3.407970 |
| 41 | 1 | -0.140085 | -3.329935 | -0.630453 |
| 42 | 1 | -3.363015 | 0.146787  | -0.661255 |
| 43 | 1 | 0.124689  | 3.346587  | -0.674029 |
| 44 | 1 | 3.346003  | -0.135516 | -0.700391 |
| 45 | 8 | 0.014148  | -0.061437 | 2.115863  |
| 46 | 1 | -0.681808 | -0.727866 | 2.258660  |
| 47 | 1 | 0.847292  | -0.538832 | 2.274178  |
| 48 | 7 | 3.531206  | 2.393961  | 0.815918  |
| 49 | 7 | -2.395712 | 3.523051  | 0.851213  |
| 50 | 7 | -3.549439 | -2.384074 | 0.860752  |
| 51 | 7 | 2.425900  | -3.504297 | 0.839730  |
| 52 | 1 | 4.537120  | 2.508192  | 0.589926  |
| 53 | 1 | -2.501345 | 4.532929  | 0.639769  |
| 54 | 1 | -4.551123 | -2.523495 | 0.623463  |
| 55 | 1 | 2.557735  | -4.509106 | 0.612110  |
| 56 | 6 | 3.232148  | -3.226090 | 2.022290  |
| 57 | 1 | 2.603438  | -2.883939 | 2.850765  |
| 58 | 6 | 3.270240  | 3.164598  | 2.025477  |
| 59 | 1 | 2.895144  | 2.517166  | 2.824463  |
| 60 | 6 | -3.173439 | 3.250031  | 2.053526  |
| 61 | 1 | -2.531512 | 2.863267  | 2.851393  |
| 62 | 6 | -3.284420 | -3.164442 | 2.063480  |
| 63 | 1 | -2.958646 | -2.516809 | 2.884011  |
| 64 | 1 | 3.972088  | -2.447124 | 1.813442  |
| 65 | 1 | 2.519531  | 3.939157  | 1.838306  |
| 66 | 1 | -3.949636 | 2.504443  | 1.853169  |
| 67 | 1 | -2.498067 | -3.903576 | 1.881397  |
| 68 | 6 | 4.635257  | 3.811382  | 2.434468  |
| 69 | 8 | 5.604512  | 3.531466  | 1.661707  |
| 70 | 8 | 4.615470  | 4.521696  | 3.461947  |
| 71 | 6 | -3.817545 | 4.612234  | 2.476153  |
| 72 | 8 | -3.527539 | 5.590733  | 1.718979  |
| 73 | 8 | -4.535909 | 4.581546  | 3.497803  |
| 74 | 6 | -4.633499 | -3.870728 | 2.427949  |
| 75 | 8 | -4.607658 | -4.608561 | 3.435001  |
| 76 | 8 | -5.596745 | -3.600616 | 1.644221  |
| 77 | 6 | 3.938555  | -4.573531 | 2.392306  |
| 78 | 8 | 3.650842  | -5.545806 | 1.626180  |

|    |    |           |           |           |
|----|----|-----------|-----------|-----------|
| 79 | 8  | 4.694162  | -4.537748 | 3.385833  |
| 80 | 6  | -1.432970 | 4.445367  | -1.681748 |
| 81 | 1  | -2.489758 | 4.360168  | -1.947246 |
| 82 | 1  | -1.318245 | 5.274056  | -0.977740 |
| 83 | 1  | -0.869223 | 4.718064  | -2.576804 |
| 84 | 6  | 4.432174  | 1.422332  | -1.718785 |
| 85 | 1  | 4.346064  | 2.480446  | -1.978539 |
| 86 | 1  | 5.268733  | 1.302969  | -1.024890 |
| 87 | 1  | 4.693328  | 0.862427  | -2.619755 |
| 88 | 6  | 1.396344  | -4.445276 | -1.652075 |
| 89 | 1  | 2.448801  | -4.367308 | -1.936521 |
| 90 | 1  | 1.289652  | -5.266800 | -0.938445 |
| 91 | 1  | 0.816442  | -4.723630 | -2.534780 |
| 92 | 6  | -4.462904 | -1.413661 | -1.664694 |
| 93 | 1  | -4.381346 | -2.472928 | -1.921481 |
| 94 | 1  | -5.294342 | -1.289161 | -0.965583 |
| 95 | 1  | -4.728637 | -0.856387 | -2.565744 |
| 96 | 70 | -0.010768 | 0.023529  | -0.370722 |

E(RTPSSh) = -2550.6691996 Hartree

Zero-point correction = 0.781801 Hartree/particle

Sum of electronic and thermal Energies = -2549.834625 Hartree

Sum of electronic and thermal Enthalpies = -2549.833681 Hartree

Sum of electronic and thermal Free Energies = -2549.977647 Hartree

**Table S58.** [Lu(DOTMA-(gly)<sub>4</sub>(H<sub>2</sub>O)]<sup>-</sup> [TSAP, Δ(δδδ)], TPSSh/LCRECP/6-31G(d,p), aqueous solution (0 Imaginary Frequencies)

| Center<br>Number | Atomic<br>Number | Coordinates (Angstroms) |           |           |
|------------------|------------------|-------------------------|-----------|-----------|
|                  |                  | X                       | Y         | Z         |
| 1                | 7                | -0.722692               | 1.977754  | -1.959643 |
| 2                | 6                | 0.278238                | 2.205533  | -3.034352 |
| 3                | 6                | 1.713074                | 2.079627  | -2.544781 |
| 4                | 7                | 1.994788                | 0.736274  | -1.956402 |
| 5                | 6                | 2.209767                | -0.252298 | -3.045790 |
| 6                | 6                | 2.087932                | -1.693336 | -2.572107 |
| 7                | 7                | 0.747865                | -1.981801 | -1.978349 |
| 8                | 6                | -0.242143               | -2.201917 | -3.065045 |
| 9                | 6                | -1.681934               | -2.075181 | -2.589544 |
| 10               | 7                | -1.966202               | -0.737002 | -1.990438 |
| 11               | 6                | -2.173681               | 0.264420  | -3.068142 |
| 12               | 6                | -2.056699               | 1.697964  | -2.570629 |
| 13               | 6                | -0.832494               | 3.151028  | -1.030332 |
| 14               | 6                | -1.654630               | 2.661260  | 0.165127  |
| 15               | 8                | -1.593228               | 1.426771  | 0.480463  |
| 16               | 6                | 3.177468                | 0.832338  | -1.037842 |
| 17               | 6                | 2.698337                | 1.627756  | 0.179332  |
| 18               | 8                | 1.467066                | 1.557591  | 0.508492  |
| 19               | 6                | 0.851080                | -3.159747 | -1.053402 |
| 20               | 6                | 1.659556                | -2.667918 | 0.153183  |
| 21               | 8                | 1.623614                | -1.430843 | 0.448347  |
| 22               | 6                | -3.153654               | -0.840849 | -1.079016 |
| 23               | 6                | -2.674608               | -1.645002 | 0.133876  |
| 24               | 8                | -1.444239               | -1.591271 | 0.454635  |
| 25               | 1                | 0.086910                | 1.469038  | -3.818010 |
| 26               | 1                | 0.148541                | 3.187868  | -3.505332 |
| 27               | 1                | 1.915013                | 2.835903  | -1.781221 |
| 28               | 1                | 2.388533                | 2.286843  | -3.384582 |
| 29               | 1                | 1.464481                | -0.051758 | -3.818949 |
| 30               | 1                | 3.187101                | -0.117381 | -3.525764 |

|    |   |           |           |           |
|----|---|-----------|-----------|-----------|
| 31 | 1 | 2.849548  | -1.903735 | -1.816829 |
| 32 | 1 | 2.288263  | -2.359000 | -3.421255 |
| 33 | 1 | -0.041007 | -1.462796 | -3.844061 |
| 34 | 1 | -0.109859 | -3.182810 | -3.538399 |
| 35 | 1 | -1.893359 | -2.837824 | -1.835153 |
| 36 | 1 | -2.349448 | -2.271980 | -3.438122 |
| 37 | 1 | -1.423413 | 0.075618  | -3.839720 |
| 38 | 1 | -3.148038 | 0.136570  | -3.556265 |
| 39 | 1 | -2.825114 | 1.895618  | -1.818298 |
| 40 | 1 | -2.250403 | 2.377483  | -3.410288 |
| 41 | 1 | 0.174930  | 3.324950  | -0.634630 |
| 42 | 1 | 3.357797  | -0.181587 | -0.663087 |
| 43 | 1 | -0.160550 | -3.340653 | -0.672430 |
| 44 | 1 | -3.340840 | 0.170542  | -0.701107 |
| 45 | 8 | -0.014895 | 0.055072  | 2.104839  |
| 46 | 1 | 0.685728  | 0.716741  | 2.246610  |
| 47 | 1 | -0.844819 | 0.539416  | 2.258946  |
| 48 | 7 | -3.543076 | -2.353405 | 0.820569  |
| 49 | 7 | 2.355706  | -3.533252 | 0.856342  |
| 50 | 7 | 3.560005  | 2.343381  | 0.863868  |
| 51 | 7 | -2.382878 | 3.517225  | 0.844014  |
| 52 | 1 | -4.551191 | -2.457488 | 0.599345  |
| 53 | 1 | 2.451568  | -4.545138 | 0.649688  |
| 54 | 1 | 4.564128  | 2.473055  | 0.631167  |
| 55 | 1 | -2.504795 | 4.524337  | 0.620708  |
| 56 | 6 | -3.188218 | 3.243355  | 2.028213  |
| 57 | 1 | -2.560371 | 2.892434  | 2.853714  |
| 58 | 6 | -3.284972 | -3.124677 | 2.030339  |
| 59 | 1 | -2.899565 | -2.479933 | 2.826580  |
| 60 | 6 | 3.135177  | -3.262602 | 2.058064  |
| 61 | 1 | 2.496570  | -2.865915 | 2.853717  |
| 62 | 6 | 3.297873  | 3.124594  | 2.066686  |
| 63 | 1 | 2.963088  | 2.478908  | 2.885165  |
| 64 | 1 | -3.936728 | 2.472645  | 1.819359  |
| 65 | 1 | -2.543496 | -3.907634 | 1.841347  |
| 66 | 1 | 3.919080  | -2.525841 | 1.855099  |
| 67 | 1 | 2.519293  | 3.871455  | 1.882827  |
| 68 | 6 | -4.655101 | -3.755948 | 2.446500  |
| 69 | 8 | -5.624509 | -3.467661 | 1.677017  |
| 70 | 8 | -4.638552 | -4.463864 | 3.475678  |
| 71 | 6 | 3.765102  | -4.629368 | 2.487354  |
| 72 | 8 | 3.466404  | -5.608136 | 1.733916  |
| 73 | 8 | 4.482326  | -4.601423 | 3.509870  |
| 74 | 6 | 4.652372  | 3.817252  | 2.437289  |
| 75 | 8 | 4.629789  | 4.553753  | 3.445365  |
| 76 | 8 | 5.615877  | 3.538943  | 1.656773  |
| 77 | 6 | -3.879488 | 4.596857  | 2.404794  |
| 78 | 8 | -3.583976 | 5.568572  | 1.640946  |
| 79 | 8 | -4.632314 | 4.565541  | 3.400544  |
| 80 | 6 | 1.387921  | -4.456507 | -1.675722 |
| 81 | 1 | 2.445631  | -4.381795 | -1.940762 |
| 82 | 1 | 1.265295  | -5.281850 | -0.969103 |
| 83 | 1 | 0.822242  | -4.726973 | -2.570256 |
| 84 | 6 | -4.443584 | -1.378895 | -1.714623 |
| 85 | 1 | -4.367715 | -2.438053 | -1.973364 |
| 86 | 1 | -5.277122 | -1.251286 | -1.018552 |
| 87 | 1 | -4.702184 | -0.817654 | -2.615513 |
| 88 | 6 | -1.354591 | 4.454390  | -1.651191 |
| 89 | 1 | -2.408548 | 4.385939  | -1.932552 |
| 90 | 1 | -1.238705 | 5.274045  | -0.936839 |
| 91 | 1 | -0.774887 | 4.728816  | -2.535281 |
| 92 | 6 | 4.472152  | 1.370983  | -1.662735 |

|    |    |          |           |           |
|----|----|----------|-----------|-----------|
| 93 | 1  | 4.400089 | 2.431329  | -1.917913 |
| 94 | 1  | 5.301169 | 1.238360  | -0.962237 |
| 95 | 1  | 4.734883 | 0.812902  | -2.564192 |
| 96 | 71 | 0.010271 | -0.024211 | -0.377916 |

E(RTPSSh) = -2551.2227829 Hartree

Zero-point correction = 0.782063 Hartree/particle

Sum of electronic and thermal Energies = -2550.388021 Hartree

Sum of electronic and thermal Enthalpies = -2550.387077 Hartree

Sum of electronic and thermal Free Energies = -2550.530756 Hartree

**Table S59.** [La(DOTA-(gly)<sub>4</sub>(H<sub>2</sub>O))<sup>-</sup>] [SAP, Δ(λλλλ)], TPSSh/LCRECP/6-31G(d,p), aqueous solution (0 Imaginary Frequencies)

| Center Number | Atomic Number | Coordinates (Angstroms) |           |           |
|---------------|---------------|-------------------------|-----------|-----------|
|               |               | X                       | Y         | Z         |
| 1             | 7             | 0.557447                | 2.097087  | 1.714084  |
| 2             | 6             | 1.472982                | 1.641656  | 2.800937  |
| 3             | 6             | 2.585585                | 0.704094  | 2.337715  |
| 4             | 7             | 2.070047                | -0.555499 | 1.718586  |
| 5             | 6             | 1.623713                | -1.487480 | 2.795804  |
| 6             | 6             | 0.678853                | -2.588645 | 2.321499  |
| 7             | 7             | -0.578973               | -2.056635 | 1.714203  |
| 8             | 6             | -1.499209               | -1.602491 | 2.798708  |
| 9             | 6             | -2.610664               | -0.664496 | 2.332747  |
| 10            | 7             | -2.089768               | 0.590973  | 1.711676  |
| 11            | 6             | -1.648421               | 1.526237  | 2.787930  |
| 12            | 6             | -0.702523               | 2.627838  | 2.316343  |
| 13            | 6             | 1.188505                | 3.166099  | 0.899726  |
| 14            | 6             | 2.172016                | 2.604023  | -0.118297 |
| 15            | 8             | 1.938497                | 1.475728  | -0.652390 |
| 16            | 6             | 3.151858                | -1.164918 | 0.902877  |
| 17            | 6             | 2.617099                | -2.144335 | -0.132417 |
| 18            | 8             | 1.497122                | -1.910640 | -0.690553 |
| 19            | 6             | -1.206188               | -3.128372 | 0.898761  |
| 20            | 6             | -2.199209               | -2.571613 | -0.112593 |
| 21            | 8             | -1.971929               | -1.443566 | -0.650573 |
| 22            | 6             | -3.159887               | 1.201541  | 0.882159  |
| 23            | 6             | -2.602827               | 2.169143  | -0.153927 |
| 24            | 8             | -1.477535               | 1.926585  | -0.693419 |
| 25            | 1             | 0.863879                | 1.145224  | 3.559854  |
| 26            | 1             | 1.934559                | 2.509621  | 3.293325  |
| 27            | 1             | 3.220500                | 1.202542  | 1.604154  |
| 28            | 1             | 3.222360                | 0.474178  | 3.203337  |
| 29            | 1             | 1.137294                | -0.889552 | 3.569792  |
| 30            | 1             | 2.495307                | -1.958913 | 3.271632  |
| 31            | 1             | 1.170470                | -3.214562 | 1.575271  |
| 32            | 1             | 0.448986                | -3.237425 | 3.178247  |
| 33            | 1             | -0.892429               | -1.105989 | 3.559378  |
| 34            | 1             | -1.960525               | -2.471801 | 3.288618  |
| 35            | 1             | -3.246583               | -1.163139 | 1.600299  |
| 36            | 1             | -3.246979               | -0.431715 | 3.197995  |
| 37            | 1             | -1.165097               | 0.930577  | 3.565666  |
| 38            | 1             | -2.522720               | 1.997927  | 3.258764  |
| 39            | 1             | -1.192542               | 3.253166  | 1.568521  |
| 40            | 1             | -0.477311               | 3.277107  | 3.174174  |
| 41            | 1             | 0.396539                | 3.648031  | 0.317289  |
| 42            | 1             | 3.624850                | -0.360110 | 0.330951  |
| 43            | 1             | -0.412806               | -3.602059 | 0.311326  |
| 44            | 1             | -3.634407               | 0.396036  | 0.312613  |

|    |    |           |           |           |
|----|----|-----------|-----------|-----------|
| 45 | 8  | 0.136162  | -0.459643 | -2.608038 |
| 46 | 1  | 0.695234  | -1.254987 | -2.660444 |
| 47 | 1  | -0.676888 | -0.669165 | -3.093229 |
| 48 | 7  | -3.350605 | 3.198861  | -0.488794 |
| 49 | 7  | -3.233422 | -3.323381 | -0.425828 |
| 50 | 7  | 3.376383  | -3.169368 | -0.450813 |
| 51 | 7  | 3.206383  | 3.351962  | -0.440731 |
| 52 | 1  | -4.270260 | 3.436500  | -0.068628 |
| 53 | 1  | -3.454068 | -4.247452 | -0.005966 |
| 54 | 1  | 4.293034  | -3.398562 | -0.016805 |
| 55 | 1  | 3.432737  | 4.275672  | -0.023911 |
| 56 | 6  | 4.204120  | 3.081802  | -1.467760 |
| 57 | 1  | 3.730426  | 2.959162  | -2.447065 |
| 58 | 6  | -3.083449 | 4.179702  | -1.532877 |
| 59 | 1  | -2.970973 | 3.690426  | -2.505694 |
| 60 | 6  | -4.239318 | -3.059550 | -1.446572 |
| 61 | 1  | -4.794738 | -2.143730 | -1.220130 |
| 62 | 6  | 3.134062  | -4.160817 | -1.491244 |
| 63 | 1  | 3.039249  | -3.681297 | -2.470894 |
| 64 | 1  | -2.161034 | 4.730703  | -1.323141 |
| 65 | 1  | 4.757318  | 2.164234  | -1.242826 |
| 66 | 1  | 2.211148  | -4.715365 | -1.294269 |
| 67 | 1  | -3.773084 | -2.937788 | -2.429596 |
| 68 | 6  | 4.367899  | -5.125922 | -1.467826 |
| 69 | 8  | 5.248950  | -4.831505 | -0.601192 |
| 70 | 8  | 4.341322  | -6.061261 | -2.294528 |
| 71 | 6  | 5.171651  | 4.313242  | -1.474160 |
| 72 | 8  | 4.880179  | 5.217241  | -0.630744 |
| 73 | 8  | 6.107796  | 4.263090  | -2.299611 |
| 74 | 6  | -4.310049 | 5.153187  | -1.543830 |
| 75 | 8  | -5.208107 | 4.879230  | -0.688188 |
| 76 | 8  | -4.262253 | 6.076059  | -2.384074 |
| 77 | 6  | -5.201486 | -4.295432 | -1.442573 |
| 78 | 8  | -4.898919 | -5.195905 | -0.599237 |
| 79 | 8  | -6.144294 | -4.251628 | -2.260590 |
| 80 | 57 | -0.007600 | 0.011505  | -0.037303 |
| 81 | 1  | -1.667111 | -3.898649 | 1.531088  |
| 82 | 1  | -3.929057 | 1.680124  | 1.502610  |
| 83 | 1  | 1.659423  | 3.931186  | 1.531212  |
| 84 | 1  | 3.919458  | -1.631230 | 1.534379  |

E(RTPSSh) = -2385.5681949 Hartree

Zero-point correction = 0.667502 Hartree/particle

Sum of electronic and thermal Energies = -2384.852552 Hartree

Sum of electronic and thermal Enthalpies = -2384.851608 Hartree

Sum of electronic and thermal Free Energies = -2384.988373 Hartree

**Table S60.** [Ce(DOTA-(gly)<sub>4</sub>(H<sub>2</sub>O)]<sup>-</sup> [SAP, Δ(λλλλ)], TPSSh/LCRECP/6-31G(d,p), aqueous solution (0 Imaginary Frequencies)

| Center Number | Atomic Number | Coordinates (Angstroms) |           |          |
|---------------|---------------|-------------------------|-----------|----------|
|               |               | X                       | Y         | Z        |
| 1             | 7             | 0.620739                | 2.076249  | 1.749507 |
| 2             | 6             | 1.527594                | 1.601488  | 2.835605 |
| 3             | 6             | 2.610713                | 0.630549  | 2.371346 |
| 4             | 7             | 2.055289                | -0.613175 | 1.754246 |
| 5             | 6             | 1.585754                | -1.532909 | 2.832084 |
| 6             | 6             | 0.610976                | -2.607057 | 2.356680 |
| 7             | 7             | -0.631244               | -2.038009 | 1.750189 |
| 8             | 6             | -1.541212               | -1.564125 | 2.835039 |

|    |   |           |           |           |
|----|---|-----------|-----------|-----------|
| 9  | 6 | -2.623731 | -0.593089 | 2.369114  |
| 10 | 7 | -2.064341 | 0.646923  | 1.749709  |
| 11 | 6 | -1.598390 | 1.570127  | 2.826158  |
| 12 | 6 | -0.622855 | 2.644549  | 2.352329  |
| 13 | 6 | 1.278582  | 3.121480  | 0.925303  |
| 14 | 6 | 2.230644  | 2.524087  | -0.102344 |
| 15 | 8 | 1.961122  | 1.395619  | -0.619198 |
| 16 | 6 | 3.113132  | -1.253909 | 0.931188  |
| 17 | 6 | 2.541864  | -2.199108 | -0.116139 |
| 18 | 8 | 1.422942  | -1.925730 | -0.658315 |
| 19 | 6 | -1.286107 | -3.086793 | 0.926686  |
| 20 | 6 | -2.248896 | -2.496069 | -0.094214 |
| 21 | 8 | -1.984619 | -1.369112 | -0.618367 |
| 22 | 6 | -3.112933 | 1.287748  | 0.915487  |
| 23 | 6 | -2.523951 | 2.223192  | -0.132218 |
| 24 | 8 | -1.399362 | 1.945751  | -0.656204 |
| 25 | 1 | 0.908406  | 1.126661  | 3.600097  |
| 26 | 1 | 2.015754  | 2.458829  | 3.320702  |
| 27 | 1 | 3.258129  | 1.109415  | 1.635506  |
| 28 | 1 | 3.242679  | 0.382414  | 3.235432  |
| 29 | 1 | 1.115912  | -0.922676 | 3.606770  |
| 30 | 1 | 2.444873  | -2.027976 | 3.306562  |
| 31 | 1 | 1.085265  | -3.244852 | 1.609134  |
| 32 | 1 | 0.362923  | -3.251003 | 3.211948  |
| 33 | 1 | -0.923362 | -1.088797 | 3.600242  |
| 34 | 1 | -2.028531 | -2.422550 | 3.318756  |
| 35 | 1 | -3.272533 | -1.072217 | 1.634738  |
| 36 | 1 | -3.254668 | -0.342368 | 3.233228  |
| 37 | 1 | -1.130826 | 0.962191  | 3.604092  |
| 38 | 1 | -2.459675 | 2.065601  | 3.296441  |
| 39 | 1 | -1.096111 | 3.281633  | 1.603513  |
| 40 | 1 | -0.378283 | 3.289099  | 3.208329  |
| 41 | 1 | 0.497117  | 3.628417  | 0.350152  |
| 42 | 1 | 3.616368  | -0.461322 | 0.368299  |
| 43 | 1 | -0.503487 | -3.585708 | 0.345932  |
| 44 | 1 | -3.617481 | 0.494514  | 0.354783  |
| 45 | 8 | 0.065348  | -0.395281 | -2.536165 |
| 46 | 1 | 0.631607  | -1.182648 | -2.621996 |
| 47 | 1 | -0.784694 | -0.635903 | -2.937576 |
| 48 | 7 | -3.246020 | 3.261460  | -0.495400 |
| 49 | 7 | -3.295564 | -3.218272 | -0.433325 |
| 50 | 7 | 3.269957  | -3.236934 | -0.464392 |
| 51 | 7 | 3.276053  | 3.243084  | -0.453029 |
| 52 | 1 | -4.166523 | 3.524314  | -0.092718 |
| 53 | 1 | -3.544148 | -4.142956 | -0.030971 |
| 54 | 1 | 4.186869  | -3.496951 | -0.049700 |
| 55 | 1 | 3.529653  | 4.167933  | -0.055144 |
| 56 | 6 | 4.240618  | 2.941198  | -1.502762 |
| 57 | 1 | 3.736924  | 2.803466  | -2.464817 |
| 58 | 6 | -2.953058 | 4.207490  | -1.564488 |
| 59 | 1 | -2.826900 | 3.687058  | -2.519189 |
| 60 | 6 | -4.268589 | -2.923072 | -1.477191 |
| 61 | 1 | -4.819776 | -2.005096 | -1.248818 |
| 62 | 6 | 2.991733  | -4.191545 | -1.530013 |
| 63 | 1 | 2.882383  | -3.679363 | -2.491324 |
| 64 | 1 | -2.030471 | 4.758525  | -1.355290 |
| 65 | 1 | 4.790783  | 2.022475  | -1.274701 |
| 66 | 1 | 2.065249  | -4.739290 | -1.330307 |
| 67 | 1 | -3.772358 | -2.787991 | -2.443548 |
| 68 | 6 | 4.210385  | -5.174669 | -1.564742 |
| 69 | 8 | 5.107822  | -4.931615 | -0.699076 |
| 70 | 8 | 4.157100  | -6.073324 | -2.430151 |

|    |    |           |           |           |
|----|----|-----------|-----------|-----------|
| 71 | 6  | 5.220850  | 4.160888  | -1.562268 |
| 72 | 8  | 4.973271  | 5.078597  | -0.719581 |
| 73 | 8  | 6.123806  | 4.089242  | -2.422476 |
| 74 | 6  | -4.171220 | 5.189339  | -1.627015 |
| 75 | 8  | -5.079996 | 4.957900  | -0.770062 |
| 76 | 8  | -4.107240 | 6.077506  | -2.502943 |
| 77 | 6  | -5.245163 | -4.146421 | -1.524558 |
| 78 | 8  | -4.986504 | -5.060507 | -0.681250 |
| 79 | 8  | -6.155636 | -4.080495 | -2.377043 |
| 80 | 58 | -0.004181 | 0.012694  | 0.028128  |
| 81 | 1  | -1.778942 | -3.842442 | 1.552441  |
| 82 | 1  | -3.863419 | 1.800045  | 1.531777  |
| 83 | 1  | 1.782129  | 3.871849  | 1.549118  |
| 84 | 1  | 3.862702  | -1.756488 | 1.556374  |

E(RTPSSh) = -2386.2199658 Hartree

Zero-point correction = 0.667579 Hartree/particle

Sum of electronic and thermal Energies = -2385.504316 Hartree

Sum of electronic and thermal Enthalpies = -2385.503372 Hartree

Sum of electronic and thermal Free Energies = -2385.639620 Hartree

**Table S61.** [Pr(DOTA-(gly)<sub>4</sub>(H<sub>2</sub>O)]<sup>-</sup> [SAP, Δ(λλλλ)], TPSSh/LCRECP/6-31G(d,p), aqueous solution (0 Imaginary Frequencies)

| Center Number | Atomic Number | Coordinates (Angstroms) |           |           |
|---------------|---------------|-------------------------|-----------|-----------|
|               |               | X                       | Y         | Z         |
| 1             | 7             | 0.629835                | 2.070053  | 1.761120  |
| 2             | 6             | 1.538916                | 1.599392  | 2.847257  |
| 3             | 6             | 2.616965                | 0.623450  | 2.382739  |
| 4             | 7             | 2.052927                | -0.617441 | 1.768109  |
| 5             | 6             | 1.581418                | -1.534742 | 2.847107  |
| 6             | 6             | 0.604823                | -2.606683 | 2.370752  |
| 7             | 7             | -0.634334               | -2.032568 | 1.762449  |
| 8             | 6             | -1.546488               | -1.561789 | 2.846863  |
| 9             | 6             | -2.623792               | -0.586364 | 2.379286  |
| 10            | 7             | -2.055858               | 0.650807  | 1.762199  |
| 11            | 6             | -1.588515               | 1.572196  | 2.839784  |
| 12            | 6             | -0.610625               | 2.644126  | 2.365214  |
| 13            | 6             | 1.288200                | 3.107485  | 0.927328  |
| 14            | 6             | 2.226398                | 2.499081  | -0.106533 |
| 15            | 8             | 1.947401                | 1.367094  | -0.611688 |
| 16            | 6             | 3.103483                | -1.264846 | 0.941171  |
| 17            | 6             | 2.519334                | -2.197365 | -0.109883 |
| 18            | 8             | 1.397779                | -1.912625 | -0.640680 |
| 19            | 6             | -1.289581               | -3.075405 | 0.931670  |
| 20            | 6             | -2.239431               | -2.476915 | -0.096247 |
| 21            | 8             | -1.963143               | -1.349055 | -0.614829 |
| 22            | 6             | -3.097879               | 1.297557  | 0.924341  |
| 23            | 6             | -2.497096               | 2.223342  | -0.124653 |
| 24            | 8             | -1.369356               | 1.937088  | -0.636839 |
| 25            | 1             | 0.921038                | 1.129929  | 3.616124  |
| 26            | 1             | 2.030657                | 2.458115  | 3.326049  |
| 27            | 1             | 3.264654                | 1.098468  | 1.644500  |
| 28            | 1             | 3.249985                | 0.373179  | 3.245375  |
| 29            | 1             | 1.111886                | -0.922745 | 3.620620  |
| 30            | 1             | 2.439231                | -2.031010 | 3.322569  |
| 31            | 1             | 1.078516                | -3.245970 | 1.624086  |
| 32            | 1             | 0.353082                | -3.249856 | 3.225403  |
| 33            | 1             | -0.930116               | -1.090954 | 3.616024  |
| 34            | 1             | -2.037485               | -2.421034 | 3.325190  |



|    |    |           |           |           |
|----|----|-----------|-----------|-----------|
| 35 | 1  | -3.272058 | -1.062223 | 1.642121  |
| 36 | 1  | -3.256784 | -0.333260 | 3.241114  |
| 37 | 1  | -1.121804 | 0.962785  | 3.617094  |
| 38 | 1  | -2.448844 | 2.069054  | 3.310185  |
| 39 | 1  | -1.082700 | 3.282811  | 1.617045  |
| 40 | 1  | -0.362432 | 3.287811  | 3.220676  |
| 41 | 1  | 0.505677  | 3.617795  | 0.356807  |
| 42 | 1  | 3.614932  | -0.475190 | 0.381789  |
| 43 | 1  | -0.505908 | -3.577982 | 0.355606  |
| 44 | 1  | -3.608878 | 0.507267  | 0.365483  |
| 45 | 8  | -0.017993 | -0.372852 | -2.488074 |
| 46 | 1  | 0.608338  | -1.108108 | -2.609939 |
| 47 | 1  | -0.885725 | -0.729273 | -2.741739 |
| 48 | 7  | -3.211446 | 3.262304  | -0.500478 |
| 49 | 7  | -3.285854 | -3.191471 | -0.449393 |
| 50 | 7  | 3.238190  | -3.236281 | -0.473280 |
| 51 | 7  | 3.269419  | 3.211834  | -0.475272 |
| 52 | 1  | -4.134037 | 3.531771  | -0.106676 |
| 53 | 1  | -3.544941 | -4.116459 | -0.053237 |
| 54 | 1  | 4.156212  | -3.506454 | -0.067544 |
| 55 | 1  | 3.532022  | 4.138045  | -0.085857 |
| 56 | 6  | 4.221479  | 2.899917  | -1.533568 |
| 57 | 1  | 3.707090  | 2.759292  | -2.489500 |
| 58 | 6  | -2.907189 | 4.200284  | -1.573577 |
| 59 | 1  | -2.775929 | 3.673308  | -2.523973 |
| 60 | 6  | -4.245975 | -2.887986 | -1.503010 |
| 61 | 1  | -4.795646 | -1.968553 | -1.277020 |
| 62 | 6  | 2.945866  | -4.179383 | -1.545399 |
| 63 | 1  | 2.832207  | -3.657666 | -2.501054 |
| 64 | 1  | -1.984439 | 4.749817  | -1.361193 |
| 65 | 1  | 4.770291  | 1.980246  | -1.306204 |
| 66 | 1  | 2.017554  | -4.723254 | -1.343478 |
| 67 | 1  | -3.738571 | -2.751756 | -2.463366 |
| 68 | 6  | 4.158245  | -5.169454 | -1.598045 |
| 69 | 8  | 5.062113  | -4.941406 | -0.734923 |
| 70 | 8  | 4.094792  | -6.058369 | -2.472797 |
| 71 | 6  | 5.205797  | 4.115549  | -1.609363 |
| 72 | 8  | 4.971191  | 5.037641  | -0.767654 |
| 73 | 8  | 6.098826  | 4.037100  | -2.479200 |
| 74 | 6  | -4.121849 | 5.185609  | -1.650767 |
| 75 | 8  | -5.036791 | 4.962815  | -0.798021 |
| 76 | 8  | -4.049771 | 6.067753  | -2.532099 |
| 77 | 6  | -5.226834 | -4.107428 | -1.564544 |
| 78 | 8  | -4.982086 | -5.023524 | -0.719141 |
| 79 | 8  | -6.126336 | -4.036851 | -2.428021 |
| 80 | 59 | -0.000816 | 0.014038  | 0.065037  |
| 81 | 1  | -1.792440 | -3.829101 | 1.551602  |
| 82 | 1  | -3.844666 | 1.818645  | 1.537631  |
| 83 | 1  | 1.802899  | 3.856319  | 1.543677  |
| 84 | 1  | 3.848076  | -1.778946 | 1.562846  |

-----  
E(RTPSSh) = -2386.855262 Hartree  
Zero-point correction = 0.668001 Hartree/particle  
Sum of electronic and thermal Energies = -2386.139418 Hartree  
Sum of electronic and thermal Enthalpies = -2386.138473 Hartree  
Sum of electronic and thermal Free Energies = -2386.273313 Hartree

**Table S62.** [Nd(DOTA-(gly)<sub>4</sub>(H<sub>2</sub>O))]<sup>-</sup> [SAP, Δ(λλλλ)], TPSSh/LCRECP/6-31G(d,p), aqueous solution (0 Imaginary Frequencies)

-----  
Center      Atomic      Coordinates (Angstroms)

| Number | Number | X         | Y         | Z         |
|--------|--------|-----------|-----------|-----------|
| 1      | 7      | 0.636359  | 2.061983  | 1.770181  |
| 2      | 6      | 1.545300  | 1.592297  | 2.856914  |
| 3      | 6      | 2.618900  | 0.612162  | 2.391926  |
| 4      | 7      | 2.046946  | -0.625000 | 1.777473  |
| 5      | 6      | 1.575387  | -1.541768 | 2.856778  |
| 6      | 6      | 0.595346  | -2.609626 | 2.379251  |
| 7      | 7      | -0.639835 | -2.028075 | 1.770243  |
| 8      | 6      | -1.552379 | -1.558604 | 2.854862  |
| 9      | 6      | -2.625073 | -0.578944 | 2.386692  |
| 10     | 7      | -2.049344 | 0.654958  | 1.770562  |
| 11     | 6      | -1.582273 | 1.575311  | 2.849136  |
| 12     | 6      | -0.600670 | 2.643300  | 2.374265  |
| 13     | 6      | 1.298199  | 3.092814  | 0.930959  |
| 14     | 6      | 2.227037  | 2.473688  | -0.104583 |
| 15     | 8      | 1.939425  | 1.339467  | -0.600051 |
| 16     | 6      | 3.090539  | -1.276690 | 0.945374  |
| 17     | 6      | 2.494921  | -2.199200 | -0.107622 |
| 18     | 8      | 1.370593  | -1.905472 | -0.627829 |
| 19     | 6      | -1.298040 | -3.064142 | 0.933578  |
| 20     | 6      | -2.238072 | -2.454993 | -0.096526 |
| 21     | 8      | -1.952157 | -1.324965 | -0.605910 |
| 22     | 6      | -3.084803 | 1.306178  | 0.928189  |
| 23     | 6      | -2.473154 | 2.222637  | -0.122221 |
| 24     | 8      | -1.343315 | 1.927560  | -0.624747 |
| 25     | 1      | 0.927079  | 1.126449  | 3.627721  |
| 26     | 1      | 2.039984  | 2.451014  | 3.332529  |
| 27     | 1      | 3.267992  | 1.084405  | 1.653083  |
| 28     | 1      | 3.251725  | 0.358315  | 3.253601  |
| 29     | 1      | 1.108384  | -0.929270 | 3.631453  |
| 30     | 1      | 2.432697  | -2.040685 | 3.330278  |
| 31     | 1      | 1.067074  | -3.250383 | 1.632567  |
| 32     | 1      | 0.339459  | -3.252506 | 3.232825  |
| 33     | 1      | -0.936093 | -1.091580 | 3.626430  |
| 34     | 1      | -2.046604 | -2.417939 | 3.329594  |
| 35     | 1      | -3.274392 | -1.051800 | 1.648456  |
| 36     | 1      | -3.258298 | -0.322708 | 3.247364  |
| 37     | 1      | -1.118457 | 0.965001  | 3.627498  |
| 38     | 1      | -2.442232 | 2.074670  | 3.317438  |
| 39     | 1      | -1.070281 | 3.283426  | 1.625745  |
| 40     | 1      | -0.348917 | 3.286604  | 3.228883  |
| 41     | 1      | 0.517014  | 3.606912  | 0.362184  |
| 42     | 1      | 3.606716  | -0.488842 | 0.387973  |
| 43     | 1      | -0.515306 | -3.570178 | 0.359428  |
| 44     | 1      | -3.600556 | 0.517961  | 0.370968  |
| 45     | 8      | -0.030494 | -0.336361 | -2.449764 |
| 46     | 1      | 0.596791  | -1.068661 | -2.583855 |
| 47     | 1      | -0.902148 | -0.700396 | -2.679350 |
| 48     | 7      | -3.179886 | 3.262684  | -0.508872 |
| 49     | 7      | -3.285761 | -3.161443 | -0.461013 |
| 50     | 7      | 3.206057  | -3.238847 | -0.483345 |
| 51     | 7      | 3.271072  | 3.178877  | -0.484295 |
| 52     | 1      | -4.103540 | 3.539086  | -0.121955 |
| 53     | 1      | -3.552324 | -4.087599 | -0.071981 |
| 54     | 1      | 4.125793  | -3.515914 | -0.085835 |
| 55     | 1      | 3.540002  | 4.106658  | -0.102514 |
| 56     | 6      | 4.215205  | 2.857615  | -1.546970 |
| 57     | 1      | 3.694245  | 2.712692  | -2.498669 |
| 58     | 6      | -2.865687 | 4.193589  | -1.585317 |
| 59     | 1      | -2.732041 | 3.661193  | -2.532344 |
| 60     | 6      | -4.237975 | -2.847961 | -1.518967 |

|    |    |           |           |           |
|----|----|-----------|-----------|-----------|
| 61 | 1  | -4.785638 | -1.927789 | -1.291150 |
| 62 | 6  | 2.903088  | -4.173575 | -1.559893 |
| 63 | 1  | 2.784952  | -3.645079 | -2.511254 |
| 64 | 1  | -1.941759 | 4.740421  | -1.371117 |
| 65 | 1  | 4.763308  | 1.938017  | -1.317595 |
| 66 | 1  | 1.974386  | -4.715819 | -1.355424 |
| 67 | 1  | -3.724186 | -2.708551 | -2.475432 |
| 68 | 6  | 4.111928  | -5.167282 | -1.626746 |
| 69 | 8  | 5.021387  | -4.948387 | -0.767045 |
| 70 | 8  | 4.040913  | -6.049800 | -2.507330 |
| 71 | 6  | 5.202210  | 4.070329  | -1.635962 |
| 72 | 8  | 4.975855  | 4.997199  | -0.797150 |
| 73 | 8  | 6.089078  | 3.985480  | -2.511416 |
| 74 | 6  | -4.075905 | 5.183683  | -1.673334 |
| 75 | 8  | -4.995592 | 4.969121  | -0.823484 |
| 76 | 8  | -3.996545 | 6.061018  | -2.558769 |
| 77 | 6  | -5.223066 | -4.063478 | -1.592824 |
| 78 | 8  | -4.987501 | -4.984154 | -0.749693 |
| 79 | 8  | -6.116377 | -3.985980 | -2.462016 |
| 80 | 60 | 0.000210  | 0.014265  | 0.091733  |
| 81 | 1  | -1.809332 | -3.816153 | 1.548580  |
| 82 | 1  | -3.828879 | 1.835482  | 1.537664  |
| 83 | 1  | 1.820991  | 3.839571  | 1.542912  |
| 84 | 1  | 3.832571  | -1.799702 | 1.562624  |

E(RTPSSh) = -2387.4782215 Hartree

Zero-point correction = 0.668374 Hartree/particle

Sum of electronic and thermal Energies = -2386.762193 Hartree

Sum of electronic and thermal Enthalpies = -2386.761249 Hartree

Sum of electronic and thermal Free Energies = -2386.894987 Hartree

**Table S63.** [Sm(DOTA-(gly)<sub>4</sub>(H<sub>2</sub>O)]<sup>-</sup> [SAP, Δ(λλλλ)], TPSSh/LCRECP/6-31G(d,p), aqueous solution (0 Imaginary Frequencies)

| Center Number | Atomic Number | Coordinates (Angstroms) |           |           |
|---------------|---------------|-------------------------|-----------|-----------|
|               |               | X                       | Y         | Z         |
| 1             | 7             | 0.641598                | 2.048986  | 1.784322  |
| 2             | 6             | 1.552417                | 1.584347  | 2.871796  |
| 3             | 6             | 2.620941                | 0.600150  | 2.405710  |
| 4             | 7             | 2.037644                | -0.631387 | 1.791313  |
| 5             | 6             | 1.570597                | -1.549009 | 2.871735  |
| 6             | 6             | 0.587116                | -2.612222 | 2.392909  |
| 7             | 7             | -0.642879               | -2.020182 | 1.784014  |
| 8             | 6             | -1.555929               | -1.555993 | 2.870447  |
| 9             | 6             | -2.624059               | -0.572566 | 2.402074  |
| 10            | 7             | -2.038258               | 0.656538  | 1.786529  |
| 11            | 6             | -1.574384               | 1.576983  | 2.866344  |
| 12            | 6             | -0.589742               | 2.640563  | 2.389715  |
| 13            | 6             | 1.306346                | 3.070021  | 0.935389  |
| 14            | 6             | 2.220720                | 2.434470  | -0.102305 |
| 15            | 8             | 1.923899                | 1.293812  | -0.577159 |
| 16            | 6             | 3.070345                | -1.287600 | 0.949495  |
| 17            | 6             | 2.456731                | -2.194156 | -0.106111 |
| 18            | 8             | 1.326222                | -1.888545 | -0.606365 |
| 19            | 6             | -1.305080               | -3.046230 | 0.938491  |
| 20            | 6             | -2.228944               | -2.421014 | -0.095602 |
| 21            | 8             | -1.931847               | -1.284738 | -0.585290 |
| 22            | 6             | -3.064857               | 1.312511  | 0.937191  |
| 23            | 6             | -2.437488               | 2.213496  | -0.116300 |
| 24            | 8             | -1.303144               | 1.906721  | -0.601166 |

|    |    |           |           |           |
|----|----|-----------|-----------|-----------|
| 25 | 1  | 0.935558  | 1.122691  | 3.646233  |
| 26 | 1  | 2.049424  | 2.444799  | 3.341579  |
| 27 | 1  | 3.271378  | 1.069252  | 1.666017  |
| 28 | 1  | 3.253844  | 0.341187  | 3.265652  |
| 29 | 1  | 1.107166  | -0.937423 | 3.649305  |
| 30 | 1  | 2.429282  | -2.049975 | 3.340372  |
| 31 | 1  | 1.056331  | -3.254043 | 1.645499  |
| 32 | 1  | 0.326322  | -3.255429 | 3.244604  |
| 33 | 1  | -0.940299 | -1.093172 | 3.645090  |
| 34 | 1  | -2.052030 | -2.417067 | 3.339841  |
| 35 | 1  | -3.274441 | -1.042371 | 1.662716  |
| 36 | 1  | -3.257618 | -0.312149 | 3.261102  |
| 37 | 1  | -1.113238 | 0.967079  | 3.646649  |
| 38 | 1  | -2.435078 | 2.078142  | 3.331153  |
| 39 | 1  | -1.057424 | 3.282026  | 1.641077  |
| 40 | 1  | -0.332168 | 3.283847  | 3.242432  |
| 41 | 1  | 0.526125  | 3.588446  | 0.369576  |
| 42 | 1  | 3.592361  | -0.501684 | 0.395210  |
| 43 | 1  | -0.523817 | -3.558612 | 0.368331  |
| 44 | 1  | -3.587824 | 0.526658  | 0.383768  |
| 45 | 8  | -0.041686 | -0.264728 | -2.379109 |
| 46 | 1  | 0.579874  | -0.997153 | -2.536353 |
| 47 | 1  | -0.919516 | -0.624907 | -2.591833 |
| 48 | 7  | -3.134239 | 3.252670  | -0.522630 |
| 49 | 7  | -3.273879 | -3.118364 | -0.483431 |
| 50 | 7  | 3.157116  | -3.232606 | -0.503719 |
| 51 | 7  | 3.261921  | 3.131271  | -0.504197 |
| 52 | 1  | -4.060589 | 3.537658  | -0.148187 |
| 53 | 1  | -3.549613 | -4.047943 | -0.108351 |
| 54 | 1  | 4.080175  | -3.519407 | -0.120273 |
| 55 | 1  | 3.538053  | 4.062867  | -0.136613 |
| 56 | 6  | 4.194371  | 2.795139  | -1.572622 |
| 57 | 1  | 3.663818  | 2.641933  | -2.517689 |
| 58 | 6  | -2.805404 | 4.171502  | -1.605089 |
| 59 | 1  | -2.665623 | 3.629573  | -2.545790 |
| 60 | 6  | -4.212711 | -2.789739 | -1.548833 |
| 61 | 1  | -4.759325 | -1.869735 | -1.317984 |
| 62 | 6  | 2.837090  | -4.155169 | -1.585885 |
| 63 | 1  | 2.711663  | -3.617109 | -2.530896 |
| 64 | 1  | -1.881228 | 4.716680  | -1.387794 |
| 65 | 1  | 4.742320  | 1.876548  | -1.338957 |
| 66 | 1  | 1.908050  | -4.694964 | -1.376631 |
| 67 | 1  | -3.687884 | -2.643425 | -2.498232 |
| 68 | 6  | 4.040513  | -5.154119 | -1.674406 |
| 69 | 8  | 4.959570  | -4.947272 | -0.821849 |
| 70 | 8  | 3.956934  | -6.028417 | -2.561961 |
| 71 | 6  | 5.183897  | 4.004254  | -1.683722 |
| 72 | 8  | 4.967714  | 4.940350  | -0.852444 |
| 73 | 8  | 6.062468  | 3.908415  | -2.566331 |
| 74 | 6  | -4.010737 | 5.165892  | -1.713361 |
| 75 | 8  | -4.938954 | 4.962703  | -0.869952 |
| 76 | 8  | -3.920227 | 6.035034  | -2.605750 |
| 77 | 6  | -5.201735 | -4.000791 | -1.644823 |
| 78 | 8  | -4.978896 | -4.929789 | -0.807283 |
| 79 | 8  | -6.085286 | -3.912450 | -2.522793 |
| 80 | 62 | 0.001496  | 0.014439  | 0.137504  |
| 81 | 1  | -1.830123 | -3.794692 | 1.546031  |
| 82 | 1  | -3.804365 | 1.854749  | 1.540648  |
| 83 | 1  | 1.841086  | 3.814471  | 1.539570  |
| 84 | 1  | 3.809240  | -1.824161 | 1.558675  |

-----  
E(RTPSSh) = -2388.7008851 Hartree

Zero-point correction = 0.668914 Hartree/particle  
Sum of electronic and thermal Energies = -2387.984561 Hartree  
Sum of electronic and thermal Enthalpies = -2387.983617 Hartree  
Sum of electronic and thermal Free Energies = -2388.116192 Hartree

**Table S64.** [Eu(DOTA-(gly)<sub>4</sub>(H<sub>2</sub>O))]<sup>-</sup> [SAP, Δ(λλλλ)], TPSSh/LCRECP/6-31G(d,p), aqueous solution (0 Imaginary Frequencies)

| Center Number | Atomic Number | Coordinates (Angstroms) |           |           |
|---------------|---------------|-------------------------|-----------|-----------|
|               |               | X                       | Y         | Z         |
| 1             | 7             | 0.604309                | 2.055480  | 1.793150  |
| 2             | 6             | 1.523889                | 1.610713  | 2.881564  |
| 3             | 6             | 2.608894                | 0.645531  | 2.415128  |
| 4             | 7             | 2.044446                | -0.594774 | 1.801448  |
| 5             | 6             | 1.595639                | -1.520447 | 2.882629  |
| 6             | 6             | 0.631860                | -2.600529 | 2.402546  |
| 7             | 7             | -0.606835               | -2.027925 | 1.793193  |
| 8             | 6             | -1.528854               | -1.582795 | 2.879988  |
| 9             | 6             | -2.613382               | -0.618713 | 2.410385  |
| 10            | 7             | -2.046453               | 0.619354  | 1.795707  |
| 11            | 6             | -1.601127               | 1.547965  | 2.876287  |
| 12            | 6             | -0.635802               | 2.628162  | 2.398491  |
| 13            | 6             | 1.251538                | 3.084312  | 0.940310  |
| 14            | 6             | 2.168848                | 2.458583  | -0.100441 |
| 15            | 8             | 1.889599                | 1.308688  | -0.563618 |
| 16            | 6             | 3.085310                | -1.234435 | 0.957386  |
| 17            | 6             | 2.481456                | -2.143690 | -0.101070 |
| 18            | 8             | 1.341959                | -1.854471 | -0.590679 |
| 19            | 6             | -1.251112               | -3.062602 | 0.944758  |
| 20            | 6             | -2.176917               | -2.448875 | -0.093998 |
| 21            | 8             | -1.897014               | -1.303305 | -0.572675 |
| 22            | 6             | -3.081276               | 1.258688  | 0.944007  |
| 23            | 6             | -2.463396               | 2.162917  | -0.111830 |
| 24            | 8             | -1.320658               | 1.872032  | -0.586630 |
| 25            | 1             | 0.916171                | 1.139238  | 3.657335  |
| 26            | 1             | 2.005044                | 2.481403  | 3.348893  |
| 27            | 1             | 3.250253                | 1.125582  | 1.674524  |
| 28            | 1             | 3.247132                | 0.396981  | 3.274114  |
| 29            | 1             | 1.121195                | -0.917654 | 3.660449  |
| 30            | 1             | 2.463785                | -2.005425 | 3.350584  |
| 31            | 1             | 1.112770                | -3.233205 | 1.654766  |
| 32            | 1             | 0.381044                | -3.249070 | 3.253093  |
| 33            | 1             | -0.922577               | -1.109586 | 3.655756  |
| 34            | 1             | -2.009275               | -2.453659 | 3.347566  |
| 35            | 1             | -3.254011               | -1.099642 | 1.669647  |
| 36            | 1             | -3.252953               | -0.368765 | 3.267974  |
| 37            | 1             | -1.129357               | 0.946894  | 3.657106  |
| 38            | 1             | -2.471378               | 2.033307  | 3.339994  |
| 39            | 1             | -1.114766               | 3.260610  | 1.649335  |
| 40            | 1             | -0.388158               | 3.276697  | 3.250058  |
| 41            | 1             | 0.462380                | 3.592075  | 0.377532  |
| 42            | 1             | 3.597923                | -0.440409 | 0.406175  |
| 43            | 1             | -0.460741               | -3.565082 | 0.378658  |
| 44            | 1             | -3.594447               | 0.464661  | 0.393369  |
| 45            | 8             | -0.041188               | -0.240392 | -2.345816 |
| 46            | 1             | 0.598376                | -0.955682 | -2.509562 |
| 47            | 1             | -0.911472               | -0.626299 | -2.545247 |
| 48            | 7             | -3.174987               | 3.186977  | -0.530399 |
| 49            | 7             | -3.203883               | -3.163390 | -0.497525 |
| 50            | 7             | 3.197344                | -3.166252 | -0.511763 |

|    |    |           |           |           |
|----|----|-----------|-----------|-----------|
| 51 | 7  | 3.192974  | 3.171673  | -0.517063 |
| 52 | 1  | -4.108221 | 3.459209  | -0.163479 |
| 53 | 1  | -3.466608 | -4.100089 | -0.130529 |
| 54 | 1  | 4.127702  | -3.439829 | -0.136236 |
| 55 | 1  | 3.455690  | 4.110495  | -0.157983 |
| 56 | 6  | 4.123673  | 2.843901  | -1.589623 |
| 57 | 1  | 3.589599  | 2.677859  | -2.530565 |
| 58 | 6  | -2.854129 | 4.104746  | -1.616180 |
| 59 | 1  | -2.702008 | 3.560005  | -2.553361 |
| 60 | 6  | -4.139621 | -2.844570 | -1.568659 |
| 61 | 1  | -4.701559 | -1.933789 | -1.338466 |
| 62 | 6  | 2.885924  | -4.087187 | -1.597859 |
| 63 | 1  | 2.747955  | -3.545642 | -2.539150 |
| 64 | 1  | -1.939109 | 4.664486  | -1.397432 |
| 65 | 1  | 4.686796  | 1.934926  | -1.354755 |
| 66 | 1  | 1.966245  | -4.642234 | -1.387474 |
| 67 | 1  | -3.610074 | -2.686968 | -2.513672 |
| 68 | 6  | 4.103827  | -5.067297 | -1.698277 |
| 69 | 8  | 5.025377  | -4.849618 | -0.851155 |
| 70 | 8  | 4.027482  | -5.939157 | -2.588856 |
| 71 | 6  | 5.094210  | 4.067075  | -1.713528 |
| 72 | 8  | 4.867227  | 5.005799  | -0.888129 |
| 73 | 8  | 5.970418  | 3.978025  | -2.599176 |
| 74 | 6  | -4.073102 | 5.081032  | -1.735719 |
| 75 | 8  | -5.003630 | 4.867375  | -0.897474 |
| 76 | 8  | -3.989372 | 5.948073  | -2.630789 |
| 77 | 6  | -5.109533 | -4.070001 | -1.676778 |
| 78 | 8  | -4.876259 | -5.000676 | -0.843956 |
| 79 | 8  | -5.989985 | -3.989660 | -2.558564 |
| 80 | 63 | 0.000840  | 0.014857  | 0.159795  |
| 81 | 1  | -1.769854 | -3.817705 | 1.549423  |
| 82 | 1  | -3.827635 | 1.794106  | 1.545046  |
| 83 | 1  | 1.779561  | 3.836229  | 1.541062  |
| 84 | 1  | 3.830682  | -1.764636 | 1.564184  |

E(RTPSSh) = -2389.2980601 Hartree

Zero-point correction = 0.669019 Hartree/particle

Sum of electronic and thermal Energies = -2388.581684 Hartree

Sum of electronic and thermal Enthalpies = -2388.580739 Hartree

Sum of electronic and thermal Free Energies = -2388.713252 Hartree

**Table S65.** [Gd(DOTA-(gly)<sub>4</sub>(H<sub>2</sub>O)]<sup>-</sup> [SAP, Δ(λλλλ)], TPSSh/LCRECP/6-31G(d,p), aqueous solution (0 Imaginary Frequencies)

| Center Number | Atomic Number | Coordinates (Angstroms) |           |           |
|---------------|---------------|-------------------------|-----------|-----------|
|               |               | X                       | Y         | Z         |
| 1             | 7             | 0.565235                | 2.062205  | 1.800227  |
| 2             | 6             | 1.493808                | 1.637795  | 2.889083  |
| 3             | 6             | 2.595647                | 0.692523  | 2.422344  |
| 4             | 7             | 2.051251                | -0.556514 | 1.808808  |
| 5             | 6             | 1.621722                | -1.490400 | 2.890654  |
| 6             | 6             | 0.678418                | -2.587713 | 2.409842  |
| 7             | 7             | -0.569145               | -2.035723 | 1.800051  |
| 8             | 6             | -1.500016               | -1.610688 | 2.887267  |
| 9             | 6             | -2.601337               | -0.666541 | 2.417212  |
| 10            | 7             | -2.054481               | 0.580513  | 1.803052  |
| 11            | 6             | -1.628625               | 1.517096  | 2.884470  |
| 12            | 6             | -0.683581               | 2.614508  | 2.406181  |
| 13            | 6             | 1.193553                | 3.099421  | 0.943454  |
| 14            | 6             | 2.116448                | 2.484702  | -0.098649 |

|    |   |           |           |           |
|----|---|-----------|-----------|-----------|
| 15 | 8 | 1.856093  | 1.326742  | -0.552651 |
| 16 | 6 | 3.100589  | -1.178268 | 0.962093  |
| 17 | 6 | 2.507708  | -2.092717 | -0.097722 |
| 18 | 8 | 1.359915  | -1.821883 | -0.578654 |
| 19 | 6 | -1.194442 | -3.079045 | 0.948250  |
| 20 | 6 | -2.125359 | -2.477036 | -0.092433 |
| 21 | 8 | -1.864418 | -1.322991 | -0.561757 |
| 22 | 6 | -3.097710 | 1.202125  | 0.948649  |
| 23 | 6 | -2.490380 | 2.111761  | -0.108336 |
| 24 | 8 | -1.339769 | 1.838866  | -0.574652 |
| 25 | 1 | 0.895706  | 1.156277  | 3.666175  |
| 26 | 1 | 1.958551  | 2.518482  | 3.354219  |
| 27 | 1 | 3.228041  | 1.183929  | 1.681510  |
| 28 | 1 | 3.238723  | 0.454571  | 3.280644  |
| 29 | 1 | 1.136368  | -0.896762 | 3.668799  |
| 30 | 1 | 2.499393  | -1.958669 | 3.357790  |
| 31 | 1 | 1.171134  | -3.211142 | 1.662017  |
| 32 | 1 | 0.438294  | -3.241245 | 3.259568  |
| 33 | 1 | -0.903312 | -1.127326 | 3.664212  |
| 34 | 1 | -1.964076 | -2.491372 | 3.352912  |
| 35 | 1 | -3.232633 | -1.158720 | 1.675883  |
| 36 | 1 | -3.246077 | -0.427478 | 3.273954  |
| 37 | 1 | -1.146089 | 0.925017  | 3.665596  |
| 38 | 1 | -2.508435 | 1.985676  | 3.347307  |
| 39 | 1 | -1.174233 | 3.238164  | 1.657258  |
| 40 | 1 | -0.446296 | 3.267630  | 3.257094  |
| 41 | 1 | 0.395046  | 3.593903  | 0.382217  |
| 42 | 1 | 3.601192  | -0.375624 | 0.412481  |
| 43 | 1 | -0.394838 | -3.568668 | 0.384007  |
| 44 | 1 | -3.598885 | 0.399521  | 0.399572  |
| 45 | 8 | -0.037165 | -0.222221 | -2.318847 |
| 46 | 1 | 0.615808  | -0.925303 | -2.482925 |
| 47 | 1 | -0.900405 | -0.626491 | -2.513144 |
| 48 | 7 | -3.217281 | 3.120989  | -0.536482 |
| 49 | 7 | -3.135832 | -3.208138 | -0.507341 |
| 50 | 7 | 3.239476  | -3.099747 | -0.518434 |
| 51 | 7 | 3.124934  | 3.213647  | -0.525755 |
| 52 | 1 | -4.157524 | 3.378246  | -0.176735 |
| 53 | 1 | -3.382728 | -4.152378 | -0.148504 |
| 54 | 1 | 4.177147  | -3.358119 | -0.150148 |
| 55 | 1 | 3.371939  | 4.159746  | -0.174700 |
| 56 | 6 | 4.056290  | 2.895319  | -1.600624 |
| 57 | 1 | 3.520914  | 2.713790  | -2.537969 |
| 58 | 6 | -2.905549 | 4.039582  | -1.624264 |
| 59 | 1 | -2.738695 | 3.493709  | -2.558279 |
| 60 | 6 | -4.071586 | -2.899731 | -1.581572 |
| 61 | 1 | -4.651322 | -2.000871 | -1.348843 |
| 62 | 6 | 2.937949  | -4.021406 | -1.606765 |
| 63 | 1 | 2.785673  | -3.478538 | -2.545086 |
| 64 | 1 | -2.001542 | 4.615761  | -1.402516 |
| 65 | 1 | 4.636488  | 1.998015  | -1.362572 |
| 66 | 1 | 2.029223  | -4.593190 | -1.393765 |
| 67 | 1 | -3.540115 | -2.726789 | -2.522816 |
| 68 | 6 | 4.171968  | -4.979967 | -1.718159 |
| 69 | 8 | 5.095143  | -4.748869 | -0.876427 |
| 70 | 8 | 4.104563  | -5.850184 | -2.611009 |
| 71 | 6 | 5.004569  | 4.134454  | -1.737265 |
| 72 | 8 | 4.763357  | 5.075640  | -0.918799 |
| 73 | 8 | 5.879494  | 4.053524  | -2.624941 |
| 74 | 6 | -4.140016 | 4.994647  | -1.755309 |
| 75 | 8 | -5.072708 | 4.767732  | -0.923045 |
| 76 | 8 | -4.064399 | 5.860140  | -2.652586 |

|    |    |           |           |           |
|----|----|-----------|-----------|-----------|
| 77 | 6  | -5.018309 | -4.141995 | -1.702490 |
| 78 | 8  | -4.770724 | -5.074476 | -0.875892 |
| 79 | 8  | -5.896834 | -4.070963 | -2.586935 |
| 80 | 64 | 0.000273  | 0.015155  | 0.177742  |
| 81 | 1  | -1.703979 | -3.842710 | 1.549902  |
| 82 | 1  | -3.852259 | 1.728667  | 1.547224  |
| 83 | 1  | 1.712206  | 3.860353  | 1.540917  |
| 84 | 1  | 3.854082  | -1.699614 | 1.566448  |

E(RTPSSh) = -2389.8881476 Hartree

Zero-point correction = 0.669060 Hartree/particle

Sum of electronic and thermal Energies = -2389.171748 Hartree

Sum of electronic and thermal Enthalpies = -2389.170804 Hartree

Sum of electronic and thermal Free Energies = -2389.303648 Hartree

**Table S66.** [Tb(DOTA-(gly)<sub>4</sub>(H<sub>2</sub>O)]<sup>-</sup> [SAP, Δ(λλλλ)], TPSSh/LCRECP/6-31G(d,p), aqueous solution (0 Imaginary Frequencies)

| Center Number | Atomic Number | Coordinates (Angstroms) |           |           |
|---------------|---------------|-------------------------|-----------|-----------|
|               |               | X                       | Y         | Z         |
| 1             | 7             | -0.532165               | -2.065134 | 1.808101  |
| 2             | 6             | -1.466916               | -1.657363 | 2.898053  |
| 3             | 6             | -2.582797               | -0.729119 | 2.431570  |
| 4             | 7             | -2.054962               | 0.526274  | 1.816978  |
| 5             | 6             | -1.642130               | 1.467340  | 2.899029  |
| 6             | 6             | -0.715693               | 2.578053  | 2.417209  |
| 7             | 7             | 0.538173                | 2.041834  | 1.806758  |
| 8             | 6             | 1.475832                | 1.633708  | 2.894588  |
| 9             | 6             | 2.590904                | 0.706517  | 2.424264  |
| 10            | 7             | 2.060262                | -0.547236 | 1.809998  |
| 11            | 6             | 1.651918                | -1.490440 | 2.892350  |
| 12            | 6             | 0.723370                | -2.601434 | 2.414170  |
| 13            | 6             | -1.146109               | -3.108735 | 0.948669  |
| 14            | 6             | -2.073141               | -2.501625 | -0.093725 |
| 15            | 8             | -1.827932               | -1.336814 | -0.538363 |
| 16            | 6             | -3.110858               | 1.132653  | 0.967408  |
| 17            | 6             | -2.526110               | 2.049364  | -0.094432 |
| 18            | 8             | -1.371631               | 1.792189  | -0.567083 |
| 19            | 6             | 1.148744                | 3.091141  | 0.951772  |
| 20            | 6             | 2.082369                | 2.496369  | -0.090114 |
| 21            | 8             | 1.834943                | 1.335599  | -0.550134 |
| 22            | 6             | 3.109452                | -1.153984 | 0.952304  |
| 23            | 6             | 2.509116                | -2.067144 | -0.105106 |
| 24            | 8             | 1.351974                | -1.807945 | -0.562967 |
| 25            | 1             | -0.876070               | -1.167122 | 3.675312  |
| 26            | 1             | -1.917224               | -2.545910 | 3.362334  |
| 27            | 1             | -3.208647               | -1.230174 | 1.691652  |
| 28            | 1             | -3.228840               | -0.499237 | 3.289763  |
| 29            | 1             | -1.148277               | 0.881762  | 3.677993  |
| 30            | 1             | -2.527644               | 1.921851  | 3.364848  |
| 31            | 1             | -1.217965               | 3.194162  | 1.669665  |
| 32            | 1             | -0.483611               | 3.235518  | 3.266068  |
| 33            | 1             | 0.886945                | 1.141848  | 3.672226  |
| 34            | 1             | 1.925797                | 2.522332  | 3.358898  |
| 35            | 1             | 3.214999                | 1.208118  | 1.683154  |
| 36            | 1             | 3.239404                | 0.475969  | 3.280436  |
| 37            | 1             | 1.161481                | -0.906005 | 3.674367  |
| 38            | 1             | 2.539879                | -1.945058 | 3.353430  |
| 39            | 1             | 1.223085                | -3.218151 | 1.665491  |
| 40            | 1             | 0.494599                | -3.258054 | 3.264638  |



|    |    |           |           |           |
|----|----|-----------|-----------|-----------|
| 41 | 1  | -0.340947 | -3.593552 | 0.388662  |
| 42 | 1  | -3.602149 | 0.322757  | 0.420174  |
| 43 | 1  | 0.342329  | 3.571549  | 0.389463  |
| 44 | 1  | 3.600660  | -0.344500 | 0.404475  |
| 45 | 8  | 0.030348  | 0.200195  | -2.287880 |
| 46 | 1  | -0.624489 | 0.901214  | -2.453054 |
| 47 | 1  | 0.891735  | 0.604671  | -2.489076 |
| 48 | 7  | 3.246219  | -3.065193 | -0.541833 |
| 49 | 7  | 3.080966  | 3.237917  | -0.514944 |
| 50 | 7  | -3.269237 | 3.043726  | -0.524960 |
| 51 | 7  | -3.069523 | -3.241661 | -0.530042 |
| 52 | 1  | 4.192915  | -3.310104 | -0.190597 |
| 53 | 1  | 3.315684  | 4.188599  | -0.165067 |
| 54 | 1  | -4.213249 | 3.289813  | -0.164499 |
| 55 | 1  | -3.302940 | -4.194533 | -0.188303 |
| 56 | 6  | -4.000101 | -2.928922 | -1.607248 |
| 57 | 1  | -3.462664 | -2.729934 | -2.539831 |
| 58 | 6  | 2.939622  | -3.982711 | -1.632012 |
| 59 | 1  | 2.756259  | -3.434533 | -2.561534 |
| 60 | 6  | 4.014906  | 2.934916  | -1.592323 |
| 61 | 1  | 4.609850  | 2.047056  | -1.355766 |
| 62 | 6  | -2.974860 | 3.962906  | -1.617373 |
| 63 | 1  | -2.807286 | 3.416434  | -2.550961 |
| 64 | 1  | 2.046613  | -4.574151 | -1.405833 |
| 65 | 1  | -4.596374 | -2.043511 | -1.364356 |
| 66 | 1  | -2.077030 | 4.550775  | -1.401946 |
| 67 | 1  | 3.480533  | 2.745902  | -2.528794 |
| 68 | 6  | -4.223258 | 4.900719  | -1.743677 |
| 69 | 8  | -5.148784 | 4.659804  | -0.907322 |
| 70 | 8  | -4.163159 | 5.766512  | -2.641330 |
| 71 | 6  | -4.927120 | -4.182043 | -1.760472 |
| 72 | 8  | -4.673954 | -5.127268 | -0.950357 |
| 73 | 8  | -5.799318 | -4.106613 | -2.651335 |
| 74 | 6  | 4.187436  | -4.917890 | -1.778675 |
| 75 | 8  | 5.123817  | -4.680781 | -0.953459 |
| 76 | 8  | 4.117144  | -5.780043 | -2.679609 |
| 77 | 6  | 4.941763  | 4.190401  | -1.729368 |
| 78 | 8  | 4.684124  | 5.126434  | -0.909909 |
| 79 | 8  | 5.816693  | 4.124824  | -2.617788 |
| 80 | 65 | 0.000115  | -0.014821 | 0.196065  |
| 81 | 1  | 1.652377  | 3.860971  | 1.550491  |
| 82 | 1  | 3.870894  | -1.673927 | 1.547866  |
| 83 | 1  | -1.657861 | -3.876155 | 1.543730  |
| 84 | 1  | -3.870531 | 1.648157  | 1.568979  |

E(RTPSSh) = -2390.4784054 Hartree

Zero-point correction = 0.669136 Hartree/particle

Sum of electronic and thermal Energies = -2389.761947 Hartree

Sum of electronic and thermal Enthalpies = -2389.761003 Hartree

Sum of electronic and thermal Free Energies = -2389.894084 Hartree

**Table S67.** [Dy(DOTA-(gly)<sub>4</sub>(H<sub>2</sub>O)]<sup>-</sup> [SAP, Δ(λλλλ)], TPSSh/LCRECP/6-31G(d,p), aqueous solution (0 Imaginary Frequencies)

| Center Number | Atomic Number | Coordinates (Angstroms) |           |          |
|---------------|---------------|-------------------------|-----------|----------|
|               |               | X                       | Y         | Z        |
| 1             | 7             | 0.507766                | 2.066079  | 1.815528 |
| 2             | 6             | 1.447456                | 1.671507  | 2.906039 |
| 3             | 6             | 2.573361                | 0.756094  | 2.439263 |
| 4             | 7             | 2.057368                | -0.503587 | 1.823861 |

|    |   |           |           |           |
|----|---|-----------|-----------|-----------|
| 5  | 6 | 1.657649  | -1.450087 | 2.905940  |
| 6  | 6 | 0.744118  | -2.570591 | 2.423055  |
| 7  | 7 | -0.514218 | -2.045949 | 1.812213  |
| 8  | 6 | -1.457104 | -1.651884 | 2.900593  |
| 9  | 6 | -2.582085 | -0.737263 | 2.430287  |
| 10 | 7 | -2.063286 | 0.521478  | 1.816599  |
| 11 | 6 | -1.668259 | 1.469003  | 2.900001  |
| 12 | 6 | -0.752502 | 2.590261  | 2.422021  |
| 13 | 6 | 1.110269  | 3.113818  | 0.953092  |
| 14 | 6 | 2.039632  | 2.511460  | -0.089631 |
| 15 | 8 | 1.805487  | 1.341185  | -0.525725 |
| 16 | 6 | 3.117091  | -1.098222 | 0.970985  |
| 17 | 6 | 2.536824  | -2.015928 | -0.092057 |
| 18 | 8 | 1.376648  | -1.768833 | -0.556307 |
| 19 | 6 | -1.113124 | -3.098644 | 0.953332  |
| 20 | 6 | -2.047975 | -2.507986 | -0.089375 |
| 21 | 8 | -1.810128 | -1.341746 | -0.540804 |
| 22 | 6 | -3.116328 | 1.117369  | 0.956199  |
| 23 | 6 | -2.520223 | 2.032805  | -0.101234 |
| 24 | 8 | -1.357642 | 1.783926  | -0.550921 |
| 25 | 1 | 0.862599  | 1.175126  | 3.683981  |
| 26 | 1 | 1.887033  | 2.566064  | 3.368982  |
| 27 | 1 | 3.194065  | 1.264335  | 1.699919  |
| 28 | 1 | 3.221817  | 0.531890  | 3.297089  |
| 29 | 1 | 1.157533  | -0.870919 | 3.685749  |
| 30 | 1 | 2.549105  | -1.894153 | 3.370429  |
| 31 | 1 | 1.253540  | -3.180985 | 1.675670  |
| 32 | 1 | 0.517943  | -3.231124 | 3.271075  |
| 33 | 1 | -0.874522 | -1.154465 | 3.679489  |
| 34 | 1 | -1.896503 | -2.546837 | 3.362802  |
| 35 | 1 | -3.200569 | -1.245469 | 1.688962  |
| 36 | 1 | -3.233501 | -0.513341 | 3.285951  |
| 37 | 1 | -1.171705 | 0.890176  | 3.682375  |
| 38 | 1 | -2.562239 | 1.912695  | 3.360022  |
| 39 | 1 | -1.259129 | 3.201912  | 1.673842  |
| 40 | 1 | -0.529866 | 3.249157  | 3.272290  |
| 41 | 1 | 0.299826  | 3.590726  | 0.394007  |
| 42 | 1 | 3.600883  | -0.282849 | 0.425292  |
| 43 | 1 | -0.301311 | -3.571140 | 0.392195  |
| 44 | 1 | -3.600019 | 0.302982  | 0.409046  |
| 45 | 8 | -0.026347 | -0.179761 | -2.262552 |
| 46 | 1 | 0.632938  | -0.876156 | -2.429689 |
| 47 | 1 | -0.885215 | -0.589914 | -2.463224 |
| 48 | 7 | -3.264620 | 3.021737  | -0.546065 |
| 49 | 7 | -3.037196 | -3.256533 | -0.523375 |
| 50 | 7 | 3.287665  | -3.000245 | -0.531856 |
| 51 | 7 | 3.026317  | 3.259241  | -0.534537 |
| 52 | 1 | -4.216709 | 3.256866  | -0.202742 |
| 53 | 1 | -3.263629 | -4.211932 | -0.180722 |
| 54 | 1 | 4.236826  | -3.237248 | -0.178702 |
| 55 | 1 | 3.249735  | 4.217334  | -0.200781 |
| 56 | 6 | 3.955615  | 2.949929  | -1.613882 |
| 57 | 1 | 3.416264  | 2.737494  | -2.542378 |
| 58 | 6 | -2.961248 | 3.937848  | -1.638374 |
| 59 | 1 | -2.764045 | 3.387613  | -2.563823 |
| 60 | 6 | -3.969682 | -2.956367 | -1.602858 |
| 61 | 1 | -4.574517 | -2.075961 | -1.363606 |
| 62 | 6 | 2.997244  | -3.917161 | -1.627280 |
| 63 | 1 | 2.817591  | -3.367930 | -2.556994 |
| 64 | 1 | -2.077485 | 4.541594  | -1.408400 |
| 65 | 1 | 4.563858  | 2.073703  | -1.367381 |
| 66 | 1 | 2.107820  | -4.516805 | -1.409487 |

|    |    |           |           |           |
|----|----|-----------|-----------|-----------|
| 67 | 1  | -3.433455 | -2.756619 | -2.536033 |
| 68 | 6  | 4.255882  | -4.839465 | -1.766208 |
| 69 | 8  | 5.183986  | -4.591368 | -0.934846 |
| 70 | 8  | 4.200186  | -5.701642 | -2.667577 |
| 71 | 6  | 4.866460  | 4.213130  | -1.780931 |
| 72 | 8  | 4.604900  | 5.161675  | -0.977399 |
| 73 | 8  | 5.735871  | 4.141268  | -2.674800 |
| 74 | 6  | -4.219533 | 4.856566  | -1.798943 |
| 75 | 8  | -5.159361 | 4.611102  | -0.980128 |
| 76 | 8  | -4.152974 | 5.715575  | -2.703148 |
| 77 | 6  | -4.883164 | -4.220380 | -1.751187 |
| 78 | 8  | -4.618253 | -5.159161 | -0.937210 |
| 79 | 8  | -5.755883 | -4.157890 | -2.641960 |
| 80 | 66 | -0.000018 | 0.014903  | 0.211512  |
| 81 | 1  | -1.612636 | -3.873893 | 1.548477  |
| 82 | 1  | -3.882964 | 1.632640  | 1.549129  |
| 83 | 1  | 1.617210  | 3.886533  | 1.545378  |
| 84 | 1  | 3.881896  | -1.609808 | 1.569368  |

E(RTPSSh) = -2391.0648857 Hartree

Zero-point correction = 0.669280 Hartree/particle

Sum of electronic and thermal Energies = -2390.348330 Hartree

Sum of electronic and thermal Enthalpies = -2390.347386 Hartree

Sum of electronic and thermal Free Energies = -2390.480645 Hartree

**Table S68.** [Ho(DOTA-(gly)<sub>4</sub>(H<sub>2</sub>O)]<sup>-</sup> [SAP, Δ(λλλλ)], TPSSh/LCRECP/6-31G(d,p), aqueous solution (0 Imaginary Frequencies)

| Center Number | Atomic Number | Coordinates (Angstroms) |           |           |
|---------------|---------------|-------------------------|-----------|-----------|
|               |               | X                       | Y         | Z         |
| 1             | 7             | 0.486760                | 2.065896  | 1.822604  |
| 2             | 6             | 1.430503                | 1.682961  | 2.913589  |
| 3             | 6             | 2.564852                | 0.778565  | 2.446583  |
| 4             | 7             | 2.058680                | -0.484480 | 1.830376  |
| 5             | 6             | 1.670946                | -1.435856 | 2.912263  |
| 6             | 6             | 0.768246                | -2.564347 | 2.428390  |
| 7             | 7             | -0.493584               | -2.049027 | 1.817268  |
| 8             | 6             | -1.440959               | -1.667599 | 2.906030  |
| 9             | 6             | -2.574211               | -0.763688 | 2.435760  |
| 10            | 7             | -2.065202               | 0.499108  | 1.822670  |
| 11            | 6             | -1.682400               | 1.450427  | 2.906902  |
| 12            | 6             | -0.777357               | 2.580159  | 2.429230  |
| 13            | 6             | 1.079668                | 3.116709  | 0.957261  |
| 14            | 6             | 2.010549                | 2.517679  | -0.085636 |
| 15            | 8             | 1.785854                | 1.342504  | -0.513305 |
| 16            | 6             | 3.121106                | -1.068756 | 0.973883  |
| 17            | 6             | 2.543904                | -1.986961 | -0.089966 |
| 18            | 8             | 1.378546                | -1.748627 | -0.545925 |
| 19            | 6             | -1.082491               | -3.103951 | 0.954355  |
| 20            | 6             | -2.017881               | -2.515865 | -0.088866 |
| 21            | 8             | -1.788033               | -1.344745 | -0.531898 |
| 22            | 6             | -3.120947               | 1.085498  | 0.959171  |
| 23            | 6             | -2.527661               | 2.002549  | -0.098006 |
| 24            | 8             | -1.360150               | 1.762526  | -0.539592 |
| 25            | 1             | 0.850943                | 1.181268  | 3.692107  |
| 26            | 1             | 1.860746                | 2.582596  | 3.375419  |
| 27            | 1             | 3.181173                | 1.292864  | 1.707778  |
| 28            | 1             | 3.215279                | 0.559066  | 3.304078  |
| 29            | 1             | 1.165848                | -0.862630 | 3.693265  |
| 30            | 1             | 2.567605                | -1.871090 | 3.375068  |

|    |    |           |           |           |
|----|----|-----------|-----------|-----------|
| 31 | 1  | 1.283574  | -3.169833 | 1.681072  |
| 32 | 1  | 0.546941  | -3.227505 | 3.275595  |
| 33 | 1  | -0.864089 | -1.165574 | 3.686241  |
| 34 | 1  | -1.871253 | -2.568016 | 3.366171  |
| 35 | 1  | -3.187842 | -1.277379 | 1.694175  |
| 36 | 1  | -3.228107 | -0.545403 | 3.290934  |
| 37 | 1  | -1.181021 | 0.876757  | 3.690010  |
| 38 | 1  | -2.581668 | 1.884809  | 3.365466  |
| 39 | 1  | -1.289587 | 3.187435  | 1.681313  |
| 40 | 1  | -0.559964 | 3.240993  | 3.279284  |
| 41 | 1  | 0.264785  | 3.586865  | 0.398987  |
| 42 | 1  | 3.597869  | -0.248508 | 0.429376  |
| 43 | 1  | -0.266006 | -3.569363 | 0.394156  |
| 44 | 1  | -3.597682 | 0.266782  | 0.412439  |
| 45 | 8  | -0.022329 | -0.160842 | -2.239053 |
| 46 | 1  | 0.639067  | -0.855014 | -2.407203 |
| 47 | 1  | -0.879815 | -0.573997 | -2.439604 |
| 48 | 7  | -3.277754 | 2.983443  | -0.550836 |
| 49 | 7  | -2.999038 | -3.269638 | -0.531723 |
| 50 | 7  | 3.300876  | -2.962348 | -0.538806 |
| 51 | 7  | 2.988587  | 3.271573  | -0.539106 |
| 52 | 1  | -4.234488 | 3.210536  | -0.215064 |
| 53 | 1  | -3.219140 | -4.228978 | -0.195831 |
| 54 | 1  | 4.254621  | -3.191731 | -0.192870 |
| 55 | 1  | 3.203983  | 4.234027  | -0.212719 |
| 56 | 6  | 3.916377  | 2.964029  | -1.620317 |
| 57 | 1  | 3.375258  | 2.739929  | -2.545021 |
| 58 | 6  | -2.975905 | 3.898084  | -1.644863 |
| 59 | 1  | -2.766541 | 3.346032  | -2.566533 |
| 60 | 6  | -3.929973 | -2.970406 | -1.612872 |
| 61 | 1  | -4.542268 | -2.095918 | -1.370911 |
| 62 | 6  | 3.012689  | -3.876865 | -1.636880 |
| 63 | 1  | 2.821861  | -3.325043 | -2.562821 |
| 64 | 1  | -2.099970 | 4.511762  | -1.411210 |
| 65 | 1  | 4.534324  | 2.095561  | -1.370467 |
| 66 | 1  | 2.130690  | -4.486460 | -1.416520 |
| 67 | 1  | -3.392017 | -2.761504 | -2.543041 |
| 68 | 6  | 4.279665  | -4.785788 | -1.788077 |
| 69 | 8  | 5.210581  | -4.531869 | -0.961621 |
| 70 | 8  | 4.226814  | -5.644528 | -2.692863 |
| 71 | 6  | 4.813866  | 4.235045  | -1.799838 |
| 72 | 8  | 4.545515  | 5.186729  | -1.002287 |
| 73 | 8  | 5.680803  | 4.165403  | -2.696277 |
| 74 | 6  | -4.242312 | 4.803263  | -1.818225 |
| 75 | 8  | -5.185449 | 4.551494  | -1.005157 |
| 76 | 8  | -4.178008 | 5.659269  | -2.725428 |
| 77 | 6  | -4.833240 | -4.240559 | -1.771542 |
| 78 | 8  | -4.562866 | -5.182456 | -0.962969 |
| 79 | 8  | -5.704247 | -4.179215 | -2.664032 |
| 80 | 67 | 0.000161  | 0.014988  | 0.226151  |
| 81 | 1  | -1.578689 | -3.884025 | 1.545857  |
| 82 | 1  | -3.892379 | 1.596777  | 1.549232  |
| 83 | 1  | 1.582740  | 3.893885  | 1.546895  |
| 84 | 1  | 3.890697  | -1.576970 | 1.568902  |

-----  
E (RTPSSh) = -2391.6490573 Hartree

Zero-point correction = 0.669478 Hartree/particle

Sum of electronic and thermal Energies = -2390.932377 Hartree

Sum of electronic and thermal Enthalpies = -2390.931433 Hartree

Sum of electronic and thermal Free Energies = -2391.064576 Hartree

**Table S69.** [Er(DOTA-(gly)<sub>4</sub>(H<sub>2</sub>O))]<sup>-</sup> [SAP, Δ(λλλ)], TPSSh/LCRECP/6-31G(d,p), aqueous solution (0 Imaginary Frequencies)

| Center Number | Atomic Number | Coordinates (Angstroms) |           |           |
|---------------|---------------|-------------------------|-----------|-----------|
|               |               | X                       | Y         | Z         |
| 1             | 7             | 0.474576                | 2.064306  | 1.828349  |
| 2             | 6             | 1.420770                | 1.689301  | 2.919769  |
| 3             | 6             | 2.559605                | 0.791030  | 2.452649  |
| 4             | 7             | 2.057847                | -0.473369 | 1.836117  |
| 5             | 6             | 1.678117                | -1.427476 | 2.918158  |
| 6             | 6             | 0.781517                | -2.560233 | 2.433721  |
| 7             | 7             | -0.481691               | -2.049123 | 1.822402  |
| 8             | 6             | -1.431572               | -1.675875 | 2.911580  |
| 9             | 6             | -2.569292               | -0.778109 | 2.441214  |
| 10            | 7             | -2.064844               | 0.486346  | 1.828297  |
| 11            | 6             | -1.690024               | 1.440017  | 2.912993  |
| 12            | 6             | -0.791044               | 2.574177  | 2.435122  |
| 13            | 6             | 1.062206                | 3.115577  | 0.959853  |
| 14            | 6             | 1.992147                | 2.515859  | -0.083085 |
| 15            | 8             | 1.771938                | 1.336878  | -0.502447 |
| 16            | 6             | 3.120543                | -1.052116 | 0.976257  |
| 17            | 6             | 2.542633                | -1.968755 | -0.088132 |
| 18            | 8             | 1.373128                | -1.734798 | -0.535913 |
| 19            | 6             | -1.065245               | -3.104238 | 0.956122  |
| 20            | 6             | -1.998869               | -2.515386 | -0.087798 |
| 21            | 8             | -1.772734               | -1.340448 | -0.522799 |
| 22            | 6             | -3.121077               | 1.067432  | 0.961824  |
| 23            | 6             | -2.527140               | 1.983389  | -0.095500 |
| 24            | 8             | -1.355821               | 1.747609  | -0.529173 |
| 25            | 1             | 0.844624                | 1.185029  | 3.699184  |
| 26            | 1             | 1.845612                | 2.592245  | 3.380112  |
| 27            | 1             | 3.173589                | 1.308487  | 1.714101  |
| 28            | 1             | 3.211172                | 0.573767  | 3.309788  |
| 29            | 1             | 1.170524                | -0.857926 | 3.700255  |
| 30            | 1             | 2.578092                | -1.857540 | 3.379341  |
| 31            | 1             | 1.300019                | -3.163116 | 1.686490  |
| 32            | 1             | 0.562453                | -3.224859 | 3.280300  |
| 33            | 1             | -0.858242               | -1.171402 | 3.692852  |
| 34            | 1             | -1.856498               | -2.579677 | 3.370061  |
| 35            | 1             | -3.180297               | -1.294826 | 1.699544  |
| 36            | 1             | -3.224612               | -0.562465 | 3.295908  |
| 37            | 1             | -1.186141               | 0.869751  | 3.697004  |
| 38            | 1             | -2.592582               | 1.869082  | 3.370080  |
| 39            | 1             | -1.306343               | 3.178989  | 1.687314  |
| 40            | 1             | -0.575972               | 3.236275  | 3.284714  |
| 41            | 1             | 0.244863                | 3.582218  | 0.402314  |
| 42            | 1             | 3.593912                | -0.229277 | 0.432773  |
| 43            | 1             | -0.246224               | -3.566474 | 0.397082  |
| 44            | 1             | -3.594483               | 0.246292  | 0.415907  |
| 45            | 8             | -0.020265               | -0.144625 | -2.217689 |
| 46            | 1             | 0.640889                | -0.838827 | -2.386688 |
| 47            | 1             | -0.877875               | -0.557867 | -2.417597 |
| 48            | 7             | -3.279055               | 2.959129  | -0.556221 |
| 49            | 7             | -2.974867               | -3.270675 | -0.539072 |
| 50            | 7             | 3.301616                | -2.938494 | -0.545471 |
| 51            | 7             | 2.965075                | 3.271427  | -0.544536 |
| 52            | 1             | -4.239031               | 3.182462  | -0.227246 |
| 53            | 1             | -3.192277               | -4.232879 | -0.209527 |
| 54            | 1             | 4.258720                | -3.164276 | -0.206344 |
| 55            | 1             | 3.177033                | 4.236885  | -0.224843 |
| 56            | 6             | 3.890958                | 2.961403  | -1.626727 |

|    |    |           |           |           |
|----|----|-----------|-----------|-----------|
| 57 | 1  | 3.348007  | 2.729423  | -2.548399 |
| 58 | 6  | -2.975167 | 3.871377  | -1.651731 |
| 59 | 1  | -2.757074 | 3.317066  | -2.570000 |
| 60 | 6  | -3.903389 | -2.969078 | -1.621699 |
| 61 | 1  | -4.519422 | -2.097892 | -1.377294 |
| 62 | 6  | 3.011590  | -3.850316 | -1.645364 |
| 63 | 1  | 2.812579  | -3.296012 | -2.568089 |
| 64 | 1  | -2.103939 | 4.490531  | -1.414874 |
| 65 | 1  | 4.513352  | 2.097052  | -1.373588 |
| 66 | 1  | 2.134025  | -4.465284 | -1.422209 |
| 67 | 1  | -3.363228 | -2.753706 | -2.549110 |
| 68 | 6  | 4.282410  | -4.752020 | -1.807425 |
| 69 | 8  | 5.216973  | -4.495781 | -0.985797 |
| 70 | 8  | 4.228633  | -5.607955 | -2.714802 |
| 71 | 6  | 4.782443  | 4.235185  | -1.816666 |
| 72 | 8  | 4.512272  | 5.190631  | -1.024244 |
| 73 | 8  | 5.647080  | 4.163830  | -2.715188 |
| 74 | 6  | -4.245263 | 4.769184  | -1.836398 |
| 75 | 8  | -5.192353 | 4.515026  | -1.028689 |
| 76 | 8  | -4.179624 | 5.622592  | -2.745950 |
| 77 | 6  | -4.801655 | -4.241651 | -1.789677 |
| 78 | 8  | -4.530068 | -5.186841 | -0.985361 |
| 79 | 8  | -5.670345 | -4.178810 | -2.684294 |
| 80 | 68 | 0.000170  | 0.015217  | 0.238934  |
| 81 | 1  | -1.561423 | -3.886596 | 1.544528  |
| 82 | 1  | -3.894918 | 1.578140  | 1.549128  |
| 83 | 1  | 1.564641  | 3.895201  | 1.546692  |
| 84 | 1  | 3.892624  | -1.560077 | 1.568175  |

E(RTPSSh) = -2392.2322841 Hartree

Zero-point correction = 0.669681 Hartree/particle

Sum of electronic and thermal Energies = -2391.515490 Hartree

Sum of electronic and thermal Enthalpies = -2391.514546 Hartree

Sum of electronic and thermal Free Energies = -2391.647366 Hartree

**Table S70.** [Tm(DOTA-(gly)<sub>4</sub>(H<sub>2</sub>O)]<sup>-</sup> [SAP, Δ(λλλλ)], TPSSh/LCRECP/6-31G(d,p), aqueous solution (0 Imaginary Frequencies)

| Center Number | Atomic Number | Coordinates (Angstroms) |           |           |
|---------------|---------------|-------------------------|-----------|-----------|
|               |               | X                       | Y         | Z         |
| 1             | 7             | 0.462736                | 2.062804  | 1.833815  |
| 2             | 6             | 1.411567                | 1.695193  | 2.925467  |
| 3             | 6             | 2.554695                | 0.803116  | 2.457747  |
| 4             | 7             | 2.057592                | -0.462800 | 1.840872  |
| 5             | 6             | 1.685686                | -1.419776 | 2.923043  |
| 6             | 6             | 0.795155                | -2.556638 | 2.437821  |
| 7             | 7             | -0.469661               | -2.049960 | 1.826456  |
| 8             | 6             | -1.422312               | -1.685239 | 2.916071  |
| 9             | 6             | -2.564205               | -0.793220 | 2.445697  |
| 10            | 7             | -2.064418               | 0.473187  | 1.833312  |
| 11            | 6             | -1.697432               | 1.428955  | 2.918788  |
| 12            | 6             | -0.804615               | 2.567643  | 2.440922  |
| 13            | 6             | 1.044744                | 3.115166  | 0.962883  |
| 14            | 6             | 1.973808                | 2.515747  | -0.080665 |
| 15            | 8             | 1.758332                | 1.333448  | -0.492824 |
| 16            | 6             | 3.120822                | -1.035804 | 0.977945  |
| 17            | 6             | 2.542703                | -1.951004 | -0.087208 |
| 18            | 8             | 1.369547                | -1.721238 | -0.527706 |
| 19            | 6             | -1.047406               | -3.105246 | 0.956617  |
| 20            | 6             | -1.979965               | -2.515830 | -0.087542 |

|    |    |           |           |           |
|----|----|-----------|-----------|-----------|
| 21 | 8  | -1.758178 | -1.337198 | -0.514727 |
| 22 | 6  | -3.121268 | 1.049064  | 0.964216  |
| 23 | 6  | -2.527184 | 1.964369  | -0.093228 |
| 24 | 8  | -1.352438 | 1.733191  | -0.519927 |
| 25 | 1  | 0.838749  | 1.188298  | 3.705643  |
| 26 | 1  | 1.831161  | 2.601248  | 3.384414  |
| 27 | 1  | 3.165871  | 1.323896  | 1.719204  |
| 28 | 1  | 3.207801  | 0.588200  | 3.314262  |
| 29 | 1  | 1.175718  | -0.853797 | 3.706197  |
| 30 | 1  | 2.588954  | -1.844711 | 3.382465  |
| 31 | 1  | 1.316897  | -3.156521 | 1.690419  |
| 32 | 1  | 0.578578  | -3.223084 | 3.283567  |
| 33 | 1  | -0.852485 | -1.178994 | 3.698775  |
| 34 | 1  | -1.842129 | -2.592601 | 3.372153  |
| 35 | 1  | -3.172374 | -1.312761 | 1.703653  |
| 36 | 1  | -3.221144 | -0.580505 | 3.299839  |
| 37 | 1  | -1.191102 | 0.861703  | 3.703424  |
| 38 | 1  | -2.603255 | 1.852519  | 3.374467  |
| 39 | 1  | -1.323145 | 3.169858  | 1.693239  |
| 40 | 1  | -0.592120 | 3.231012  | 3.290118  |
| 41 | 1  | 0.224793  | 3.578616  | 0.406588  |
| 42 | 1  | 3.590868  | -0.210270 | 0.435748  |
| 43 | 1  | -0.225674 | -3.563616 | 0.398446  |
| 44 | 1  | -3.591363 | 0.225563  | 0.419050  |
| 45 | 8  | -0.017889 | -0.131025 | -2.199442 |
| 46 | 1  | 0.641170  | -0.827018 | -2.369188 |
| 47 | 1  | -0.876292 | -0.541777 | -2.400849 |
| 48 | 7  | -3.281259 | 2.934934  | -0.561178 |
| 49 | 7  | -2.950655 | -3.272953 | -0.546900 |
| 50 | 7  | 3.303793  | -2.915123 | -0.552580 |
| 51 | 7  | 2.941158  | 3.273728  | -0.549743 |
| 52 | 1  | -4.243899 | 3.154906  | -0.237796 |
| 53 | 1  | -3.165492 | -4.237657 | -0.222993 |
| 54 | 1  | 4.263526  | -3.138097 | -0.218972 |
| 55 | 1  | 3.149699  | 4.241668  | -0.235440 |
| 56 | 6  | 3.864926  | 2.962494  | -1.633412 |
| 57 | 1  | 3.320017  | 2.723736  | -2.552187 |
| 58 | 6  | -2.975717 | 3.845295  | -1.657816 |
| 59 | 1  | -2.750811 | 3.289226  | -2.573373 |
| 60 | 6  | -3.877492 | -2.968851 | -1.630291 |
| 61 | 1  | -4.496481 | -2.100477 | -1.383370 |
| 62 | 6  | 3.012073  | -3.824575 | -1.654013 |
| 63 | 1  | 2.807129  | -3.268148 | -2.574169 |
| 64 | 1  | -2.108246 | 4.468771  | -1.418517 |
| 65 | 1  | 4.491913  | 2.102091  | -1.378163 |
| 66 | 1  | 2.137699  | -4.443372 | -1.428951 |
| 67 | 1  | -3.335786 | -2.747832 | -2.555485 |
| 68 | 6  | 4.285601  | -4.721022 | -1.824456 |
| 69 | 8  | 5.223092  | -4.463143 | -1.006702 |
| 70 | 8  | 4.230886  | -5.574911 | -2.733667 |
| 71 | 6  | 4.750160  | 4.239259  | -1.832404 |
| 72 | 8  | 4.478234  | 5.197349  | -1.043783 |
| 73 | 8  | 5.612243  | 4.167401  | -2.733345 |
| 74 | 6  | -4.248731 | 4.737068  | -1.851371 |
| 75 | 8  | -5.198805 | 4.480764  | -1.047853 |
| 76 | 8  | -4.182258 | 5.588327  | -2.762873 |
| 77 | 6  | -4.771571 | -4.243309 | -1.806221 |
| 78 | 8  | -4.498201 | -5.191684 | -1.006266 |
| 79 | 8  | -5.638991 | -4.178725 | -2.701933 |
| 80 | 69 | 0.000523  | 0.015269  | 0.250596  |
| 81 | 1  | -1.543039 | -3.890406 | 1.541767  |
| 82 | 1  | -3.897500 | 1.559045  | 1.549013  |

|    |   |          |           |          |
|----|---|----------|-----------|----------|
| 83 | 1 | 1.546554 | 3.896940  | 1.547412 |
| 84 | 1 | 3.895318 | -1.543495 | 1.566958 |

E(RTPSSh) = -2392.8121598 Hartree

Zero-point correction = 0.669890 Hartree/particle

Sum of electronic and thermal Energies = -2392.095245 Hartree

Sum of electronic and thermal Enthalpies = -2392.094301 Hartree

Sum of electronic and thermal Free Energies = -2392.226685 Hartree

**Table S71.** [Yb(DOTA-(gly)<sub>4</sub>(H<sub>2</sub>O)]<sup>-</sup> [SAP, Δ(λλλλ)], TPSSh/LCRECP/6-31G(d,p), aqueous solution (0 Imaginary Frequencies)

| Center Number | Atomic Number | Coordinates (Angstroms) |           |           |
|---------------|---------------|-------------------------|-----------|-----------|
|               |               | X                       | Y         | Z         |
| 1             | 7             | 0.450005                | 2.061915  | 1.839164  |
| 2             | 6             | 1.401813                | 1.702374  | 2.930705  |
| 3             | 6             | 2.549706                | 0.817261  | 2.462175  |
| 4             | 7             | 2.057872                | -0.450552 | 1.845420  |
| 5             | 6             | 1.694239                | -1.410116 | 2.927856  |
| 6             | 6             | 0.810815                | -2.551914 | 2.442019  |
| 7             | 7             | -0.455933               | -2.050717 | 1.830583  |
| 8             | 6             | -1.411388               | -1.694971 | 2.920504  |
| 9             | 6             | -2.558142               | -0.809623 | 2.450141  |
| 10            | 7             | -2.063903               | 0.459097  | 1.838542  |
| 11            | 6             | -1.704813               | 1.416711  | 2.924768  |
| 12            | 6             | -0.819226               | 2.560718  | 2.446865  |
| 13            | 6             | 1.025490                | 3.115771  | 0.965812  |
| 14            | 6             | 1.953960                | 2.517317  | -0.078445 |
| 15            | 8             | 1.743831                | 1.331583  | -0.483229 |
| 16            | 6             | 3.121841                | -1.017627 | 0.979633  |
| 17            | 6             | 2.543778                | -1.932016 | -0.085827 |
| 18            | 8             | 1.366910                | -1.706925 | -0.518964 |
| 19            | 6             | -1.027176               | -3.106795 | 0.957559  |
| 20            | 6             | -1.959472               | -2.517755 | -0.086595 |
| 21            | 8             | -1.743051               | -1.335238 | -0.505897 |
| 22            | 6             | -3.122001               | 1.029549  | 0.967497  |
| 23            | 6             | -2.528474               | 1.944840  | -0.089866 |
| 24            | 8             | -1.350121               | 1.718901  | -0.509291 |
| 25            | 1             | 0.833055                | 1.192413  | 3.711855  |
| 26            | 1             | 1.815700                | 2.611740  | 3.388243  |
| 27            | 1             | 3.157497                | 1.341596  | 1.723359  |
| 28            | 1             | 3.204677                | 0.605287  | 3.317951  |
| 29            | 1             | 1.181100                | -0.848025 | 3.711746  |
| 30            | 1             | 2.600900                | -1.829070 | 3.386060  |
| 31            | 1             | 1.336221                | -3.148527 | 1.694563  |
| 32            | 1             | 0.597248                | -3.220126 | 3.287086  |
| 33            | 1             | -0.845536               | -1.186268 | 3.704504  |
| 34            | 1             | -1.825396               | -2.606009 | 3.374537  |
| 35            | 1             | -3.163087               | -1.332273 | 1.707641  |
| 36            | 1             | -3.216764               | -0.600457 | 3.303816  |
| 37            | 1             | -1.195088               | 0.852773  | 3.709608  |
| 38            | 1             | -2.613857               | 1.834005  | 3.379799  |
| 39            | 1             | -1.341547               | 3.160114  | 1.699559  |
| 40            | 1             | -0.609636               | 3.225270  | 3.295808  |
| 41            | 1             | 0.202569                | 3.575367  | 0.410802  |
| 42            | 1             | 3.588122                | -0.189440 | 0.438325  |
| 43            | 1             | -0.202520               | -3.560562 | 0.400013  |
| 44            | 1             | -3.588545               | 0.203701  | 0.422920  |
| 45            | 8             | -0.016920               | -0.118787 | -2.181834 |
| 46            | 1             | 0.642123                | -0.814751 | -2.351944 |



|    |    |           |           |           |
|----|----|-----------|-----------|-----------|
| 47 | 1  | -0.875336 | -0.530328 | -2.381749 |
| 48 | 7  | -3.285195 | 2.909748  | -0.564992 |
| 49 | 7  | -2.924174 | -3.277542 | -0.553822 |
| 50 | 7  | 3.307119  | -2.890491 | -0.558841 |
| 51 | 7  | 2.915146  | 3.278244  | -0.555234 |
| 52 | 1  | -4.250826 | 3.125395  | -0.247514 |
| 53 | 1  | -3.134827 | -4.245276 | -0.235992 |
| 54 | 1  | 4.269689  | -3.110080 | -0.230925 |
| 55 | 1  | 3.119309  | 4.249000  | -0.246684 |
| 56 | 6  | 3.836818  | 2.966843  | -1.640690 |
| 57 | 1  | 3.290022  | 2.719957  | -2.556171 |
| 58 | 6  | -2.978915 | 3.818533  | -1.662793 |
| 59 | 1  | -2.745844 | 3.260970  | -2.575378 |
| 60 | 6  | -3.849616 | -2.972603 | -1.638233 |
| 61 | 1  | -4.473851 | -2.108783 | -1.388577 |
| 62 | 6  | 3.014188  | -3.798084 | -1.661554 |
| 63 | 1  | 2.802736  | -3.239966 | -2.579211 |
| 64 | 1  | -2.116378 | 4.447774  | -1.420730 |
| 65 | 1  | 4.470012  | 2.111643  | -1.383238 |
| 66 | 1  | 2.143518  | -4.421292 | -1.434301 |
| 67 | 1  | -3.306595 | -2.744124 | -2.560841 |
| 68 | 6  | 4.290933  | -4.688399 | -1.840367 |
| 69 | 8  | 5.231342  | -4.427910 | -1.026760 |
| 70 | 8  | 4.235673  | -5.540552 | -2.751139 |
| 71 | 6  | 4.713613  | 4.247877  | -1.849532 |
| 72 | 8  | 4.439149  | 5.208162  | -1.064439 |
| 73 | 8  | 5.572470  | 4.176829  | -2.753605 |
| 74 | 6  | -4.256032 | 4.702333  | -1.865902 |
| 75 | 8  | -5.208793 | 4.443090  | -1.066489 |
| 76 | 8  | -4.189793 | 5.551033  | -2.779791 |
| 77 | 6  | -4.736394 | -4.250954 | -1.823098 |
| 78 | 8  | -4.459679 | -5.202045 | -1.027499 |
| 79 | 8  | -5.602055 | -4.186402 | -2.720479 |
| 80 | 70 | 0.000806  | 0.015604  | 0.261071  |
| 81 | 1  | -1.521184 | -3.895126 | 1.539728  |
| 82 | 1  | -3.900659 | 1.537998  | 1.550316  |
| 83 | 1  | 1.526013  | 3.900071  | 1.547972  |
| 84 | 1  | 3.899029  | -1.524281 | 1.565902  |

E(RTPSSh) = -2393.3956217 Hartree

Zero-point correction = 0.670108 Hartree/particle

Sum of electronic and thermal Energies = -2392.678578 Hartree

Sum of electronic and thermal Enthalpies = -2392.677634 Hartree

Sum of electronic and thermal Free Energies = -2392.809527 Hartree

**Table S72.** [Lu(DOTA-(gly)<sub>4</sub>(H<sub>2</sub>O)]<sup>-</sup> [SAP, Δ(λλλλ)], TPSSh/LCRECP/6-31G(d,p), aqueous solution (0 Imaginary Frequencies)

| Center Number | Atomic Number | Coordinates (Angstroms) |           |          |
|---------------|---------------|-------------------------|-----------|----------|
|               |               | X                       | Y         | Z        |
| 1             | 7             | 0.425905                | 2.064065  | 1.842674 |
| 2             | 6             | 1.382555                | 1.718367  | 2.934361 |
| 3             | 6             | 2.539977                | 0.846342  | 2.465576 |
| 4             | 7             | 2.060512                | -0.426120 | 1.849041 |
| 5             | 6             | 1.710322                | -1.389867 | 2.932022 |
| 6             | 6             | 0.840412                | -2.541548 | 2.446012 |
| 7             | 7             | -0.431134               | -2.053282 | 1.834459 |
| 8             | 6             | -1.390796               | -1.711112 | 2.924876 |
| 9             | 6             | -2.547352               | -0.839098 | 2.454554 |
| 10            | 7             | -2.066013               | 0.434364  | 1.842922 |

|    |   |           |           |           |
|----|---|-----------|-----------|-----------|
| 11 | 6 | -1.719870 | 1.396228  | 2.929462  |
| 12 | 6 | -0.847863 | 2.550045  | 2.450994  |
| 13 | 6 | 0.988880  | 3.122491  | 0.966703  |
| 14 | 6 | 1.920799  | 2.530443  | -0.077837 |
| 15 | 8 | 1.722943  | 1.340405  | -0.476120 |
| 16 | 6 | 3.128673  | -0.981653 | 0.981057  |
| 17 | 6 | 2.556325  | -1.899358 | -0.084344 |
| 18 | 8 | 1.374967  | -1.685906 | -0.511340 |
| 19 | 6 | -0.990310 | -3.113997 | 0.959380  |
| 20 | 6 | -1.925463 | -2.531590 | -0.085610 |
| 21 | 8 | -1.720715 | -1.344794 | -0.498974 |
| 22 | 6 | -3.129057 | 0.992970  | 0.970350  |
| 23 | 6 | -2.542092 | 1.911888  | -0.087205 |
| 24 | 8 | -1.359395 | 1.698072  | -0.500671 |
| 25 | 1 | 0.820547  | 1.202802  | 3.716711  |
| 26 | 1 | 1.785572  | 2.633493  | 3.390081  |
| 27 | 1 | 3.141880  | 1.377246  | 1.726627  |
| 28 | 1 | 3.197629  | 0.641026  | 3.320874  |
| 29 | 1 | 1.191087  | -0.834200 | 3.716471  |
| 30 | 1 | 2.622583  | -1.797646 | 3.389176  |
| 31 | 1 | 1.372637  | -3.132303 | 1.698724  |
| 32 | 1 | 0.633673  | -3.212298 | 3.290708  |
| 33 | 1 | -0.831312 | -1.196508 | 3.709589  |
| 34 | 1 | -1.793665 | -2.627745 | 3.377646  |
| 35 | 1 | -3.146546 | -1.368433 | 1.712113  |
| 36 | 1 | -3.208418 | -0.636700 | 3.307917  |
| 37 | 1 | -1.203779 | 0.838712  | 3.714724  |
| 38 | 1 | -2.634292 | 1.802420  | 3.383747  |
| 39 | 1 | -1.377241 | 3.143702  | 1.704080  |
| 40 | 1 | -0.644597 | 3.217048  | 3.299493  |
| 41 | 1 | 0.160469  | 3.573126  | 0.412611  |
| 42 | 1 | 3.586756  | -0.148522 | 0.440431  |
| 43 | 1 | -0.160425 | -3.559656 | 0.403132  |
| 44 | 1 | -3.587459 | 0.162008  | 0.426719  |
| 45 | 8 | -0.015881 | -0.108629 | -2.167530 |
| 46 | 1 | 0.650542  | -0.797342 | -2.338231 |
| 47 | 1 | -0.870246 | -0.530047 | -2.364311 |
| 48 | 7 | -3.307462 | 2.866938  | -0.568211 |
| 49 | 7 | -2.880218 | -3.299782 | -0.559170 |
| 50 | 7 | 3.327510  | -2.848509 | -0.563167 |
| 51 | 7 | 2.871928  | 3.299819  | -0.561019 |
| 52 | 1 | -4.276794 | 3.072371  | -0.255295 |
| 53 | 1 | -3.081097 | -4.271148 | -0.245948 |
| 54 | 1 | 4.293933  | -3.058428 | -0.240162 |
| 55 | 1 | 3.066012  | 4.274132  | -0.257234 |
| 56 | 6 | 3.793930  | 2.994129  | -1.647817 |
| 57 | 1 | 3.247328  | 2.737512  | -2.560740 |
| 58 | 6 | -3.007157 | 3.775989  | -1.667445 |
| 59 | 1 | -2.764493 | 3.218449  | -2.577550 |
| 60 | 6 | -3.805646 | -3.000968 | -1.645317 |
| 61 | 1 | -4.440262 | -2.145130 | -1.394369 |
| 62 | 6 | 3.039561  | -3.756716 | -1.666698 |
| 63 | 1 | 2.818548  | -3.198873 | -2.582277 |
| 64 | 1 | -2.152618 | 4.415541  | -1.424053 |
| 65 | 1 | 4.437310  | 2.147060  | -1.388742 |
| 66 | 1 | 2.176441  | -4.389580 | -1.437339 |
| 67 | 1 | -3.262431 | -2.763056 | -2.565429 |
| 68 | 6 | 4.324989  | -4.633015 | -1.852829 |
| 69 | 8 | 5.265997  | -4.364154 | -1.042656 |
| 70 | 8 | 4.274861  | -5.483736 | -2.765202 |
| 71 | 6 | 4.655837  | 4.283949  | -1.864379 |
| 72 | 8 | 4.373040  | 5.244232  | -1.082268 |

|    |    |           |           |           |
|----|----|-----------|-----------|-----------|
| 73 | 8  | 5.512790  | 4.218654  | -2.770679 |
| 74 | 6  | -4.293308 | 4.644823  | -1.877963 |
| 75 | 8  | -5.246116 | 4.377270  | -1.081371 |
| 76 | 8  | -4.233022 | 5.491419  | -2.794207 |
| 77 | 6  | -4.677484 | -4.288493 | -1.837758 |
| 78 | 8  | -4.392546 | -5.239375 | -1.044826 |
| 79 | 8  | -5.541001 | -4.230139 | -2.737583 |
| 80 | 71 | 0.000846  | 0.016094  | 0.269455  |
| 81 | 1  | -1.478713 | -3.907315 | 1.539456  |
| 82 | 1  | -3.912811 | 1.495382  | 1.551532  |
| 83 | 1  | 1.483312  | 3.912380  | 1.546450  |
| 84 | 1  | 3.911121  | -1.482597 | 1.565199  |

-----  
E(RTPSSh) = -2393.9493149 Hartree

Zero-point correction = 0.670236 Hartree/particle

Sum of electronic and thermal Energies = -2393.232197 Hartree

Sum of electronic and thermal Enthalpies = -2393.231253 Hartree

Sum of electronic and thermal Free Energies = -2393.362962 Hartree

**Table S73.** [La(DOTA-(gly)<sub>4</sub>(H<sub>2</sub>O)]<sup>-</sup> [TSAP, Δ(δδδδ)], TPSSh/LCRECP/6-31G(d,p), aqueous solution (0 Imaginary Frequencies)

| Center Number | Atomic Number | Coordinates (Angstroms) |           |           |
|---------------|---------------|-------------------------|-----------|-----------|
|               |               | X                       | Y         | Z         |
| 1             | 7             | -1.202542               | -1.752912 | 2.012427  |
| 2             | 6             | -0.274710               | -2.202297 | 3.087460  |
| 3             | 6             | 1.151324                | -2.422170 | 2.591993  |
| 4             | 7             | 1.769325                | -1.191199 | 2.014448  |
| 5             | 6             | 2.198971                | -0.269923 | 3.103447  |
| 6             | 6             | 2.426797                | 1.159493  | 2.621833  |
| 7             | 7             | 1.205245                | 1.779370  | 2.027188  |
| 8             | 6             | 0.277201                | 2.225589  | 3.102563  |
| 9             | 6             | -1.148831               | 2.444437  | 2.606894  |
| 10            | 7             | -1.763143               | 1.215830  | 2.020249  |
| 11            | 6             | -2.200383               | 0.289952  | 3.101002  |
| 12            | 6             | -2.425678               | -1.136340 | 2.609150  |
| 13            | 6             | -1.613344               | -2.907770 | 1.176996  |
| 14            | 6             | -2.347741               | -2.411375 | -0.062626 |
| 15            | 8             | -2.010605               | -1.294022 | -0.571563 |
| 16            | 6             | 2.937757                | -1.587554 | 1.191438  |
| 17            | 6             | 2.467737                | -2.298168 | -0.071734 |
| 18            | 8             | 1.354152                | -1.961598 | -0.590933 |
| 19            | 6             | 1.615253                | 2.931338  | 1.188666  |
| 20            | 6             | 2.340894                | 2.426692  | -0.054412 |
| 21            | 8             | 2.017180                | 1.298268  | -0.543097 |
| 22            | 6             | -2.920899               | 1.617044  | 1.185330  |
| 23            | 6             | -2.426879               | 2.330080  | -0.069059 |
| 24            | 8             | -1.302500               | 2.001347  | -0.564790 |
| 25            | 1             | -0.287383               | -1.446523 | 3.875685  |
| 26            | 1             | -0.636408               | -3.133531 | 3.545360  |
| 27            | 1             | 1.162633                | -3.193242 | 1.817215  |
| 28            | 1             | 1.760697                | -2.801751 | 3.423900  |
| 29            | 1             | 1.428636                | -0.286840 | 3.877314  |
| 30            | 1             | 3.121537                | -0.635000 | 3.576129  |
| 31            | 1             | 3.211884                | 1.176518  | 1.861695  |
| 32            | 1             | 2.790902                | 1.763287  | 3.464595  |
| 33            | 1             | 0.290199                | 1.468027  | 3.889292  |
| 34            | 1             | 0.637142                | 3.156375  | 3.563006  |
| 35            | 1             | -1.160831               | 3.220368  | 1.837142  |
| 36            | 1             | -1.760673               | 2.816978  | 3.440197  |

|    |    |           |           |           |
|----|----|-----------|-----------|-----------|
| 37 | 1  | -1.435143 | 0.302450  | 3.880127  |
| 38 | 1  | -3.126296 | 0.651501  | 3.569925  |
| 39 | 1  | -3.208919 | -1.148515 | 1.846867  |
| 40 | 1  | -2.791283 | -1.746766 | 3.446366  |
| 41 | 1  | -0.716390 | -3.434709 | 0.835736  |
| 42 | 1  | 3.469199  | -0.684444 | 0.875127  |
| 43 | 1  | 0.718342  | 3.461297  | 0.852234  |
| 44 | 1  | -3.453062 | 0.717017  | 0.861346  |
| 45 | 8  | -0.049268 | -0.379968 | -2.372991 |
| 46 | 1  | 0.567688  | -1.129140 | -2.460461 |
| 47 | 1  | -0.930567 | -0.755469 | -2.542653 |
| 48 | 7  | -3.208776 | 3.242980  | -0.600204 |
| 49 | 7  | 3.260449  | 3.203578  | -0.582025 |
| 50 | 7  | 3.254313  | -3.212673 | -0.590283 |
| 51 | 7  | -3.284215 | -3.180518 | -0.569308 |
| 52 | 1  | -4.121166 | 3.554406  | -0.211693 |
| 53 | 1  | 3.569911  | 4.117545  | -0.196186 |
| 54 | 1  | 4.155916  | -3.535018 | -0.183930 |
| 55 | 1  | -3.607144 | -4.083351 | -0.166332 |
| 56 | 6  | -4.064951 | -2.948004 | -1.777694 |
| 57 | 1  | -3.415154 | -2.888220 | -2.656756 |
| 58 | 6  | -2.987569 | 3.990914  | -1.831162 |
| 59 | 1  | -2.893059 | 3.314035  | -2.686249 |
| 60 | 6  | 4.025678  | 2.968583  | -1.799679 |
| 61 | 1  | 3.361595  | 2.874111  | -2.664780 |
| 62 | 6  | 3.048458  | -3.962042 | -1.823218 |
| 63 | 1  | 2.989169  | -3.287954 | -2.683830 |
| 64 | 1  | -4.624560 | -2.010209 | -1.703923 |
| 65 | 1  | -2.070042 | 4.584384  | -1.765418 |
| 66 | 1  | 4.610475  | 2.046710  | -1.718827 |
| 67 | 1  | 2.118513  | -4.537480 | -1.776807 |
| 68 | 6  | -4.233225 | 4.924958  | -2.001460 |
| 69 | 8  | -5.098187 | 4.822570  | -1.076232 |
| 70 | 8  | -4.232099 | 5.655405  | -3.014515 |
| 71 | 6  | 4.972305  | 4.205515  | -1.963825 |
| 72 | 8  | 4.860457  | 5.079230  | -1.048014 |
| 73 | 8  | 5.720609  | 4.189977  | -2.963758 |
| 74 | 6  | 4.281383  | -4.919010 | -1.958832 |
| 75 | 8  | 4.289101  | -5.657894 | -2.965336 |
| 76 | 8  | 5.127835  | -4.821962 | -1.016109 |
| 77 | 6  | -5.043878 | -4.164852 | -1.901199 |
| 78 | 8  | -4.931918 | -5.025640 | -0.973194 |
| 79 | 8  | -5.812138 | -4.148009 | -2.885426 |
| 80 | 57 | 0.004254  | 0.016772  | 0.230246  |
| 81 | 1  | -2.226097 | -3.620530 | 1.745192  |
| 82 | 1  | 3.640766  | -2.210572 | 1.760684  |
| 83 | 1  | 2.235304  | 3.642632  | 1.750992  |
| 84 | 1  | -3.628392 | 2.242254  | 1.746663  |

E(RTPSSh) = -2385.5707722 Hartree

Zero-point correction = 0.667737 Hartree/particle

Sum of electronic and thermal Energies = -2384.855077 Hartree

Sum of electronic and thermal Enthalpies = -2384.854133 Hartree

Sum of electronic and thermal Free Energies = -2384.990321 Hartree

**Table S74.** [Ce(DOTA-(gly)<sub>4</sub>(H<sub>2</sub>O))<sup>-</sup>] [TSAP, Δ(δδδδ)], TPSSh/LCRECP/6-31G(d,p), aqueous solution (0 Imaginary Frequencies)

| Center Number | Atomic Number | Coordinates (Angstroms) |   |   |
|---------------|---------------|-------------------------|---|---|
|               |               | X                       | Y | Z |

|    |   |           |           |           |
|----|---|-----------|-----------|-----------|
| 1  | 7 | -1.187570 | -1.759659 | 2.020346  |
| 2  | 6 | -0.260260 | -2.206846 | 3.096473  |
| 3  | 6 | 1.168148  | -2.412725 | 2.602879  |
| 4  | 7 | 1.771833  | -1.174581 | 2.025529  |
| 5  | 6 | 2.198482  | -0.253042 | 3.115144  |
| 6  | 6 | 2.412692  | 1.178219  | 2.633758  |
| 7  | 7 | 1.184489  | 1.783001  | 2.037079  |
| 8  | 6 | 0.255397  | 2.227794  | 3.111845  |
| 9  | 6 | -1.172211 | 2.432507  | 2.615755  |
| 10 | 7 | -1.771064 | 1.196729  | 2.028151  |
| 11 | 6 | -2.207081 | 0.270319  | 3.108637  |
| 12 | 6 | -2.418242 | -1.157774 | 2.616600  |
| 13 | 6 | -1.584842 | -2.911793 | 1.174826  |
| 14 | 6 | -2.318277 | -2.409189 | -0.062566 |
| 15 | 8 | -1.993194 | -1.279634 | -0.553065 |
| 16 | 6 | 2.938166  | -1.557905 | 1.193620  |
| 17 | 6 | 2.462124  | -2.268506 | -0.066988 |
| 18 | 8 | 1.336701  | -1.944689 | -0.569121 |
| 19 | 6 | 1.582570  | 2.931404  | 1.187879  |
| 20 | 6 | 2.309840  | 2.418579  | -0.050755 |
| 21 | 8 | 1.999413  | 1.278044  | -0.520156 |
| 22 | 6 | -2.925432 | 1.585119  | 1.182497  |
| 23 | 6 | -2.423240 | 2.298854  | -0.067913 |
| 24 | 8 | -1.287548 | 1.981600  | -0.545391 |
| 25 | 1 | -0.280835 | -1.454015 | 3.887453  |
| 26 | 1 | -0.616303 | -3.142622 | 3.549436  |
| 27 | 1 | 1.188026  | -3.183833 | 1.828418  |
| 28 | 1 | 1.781344  | -2.785289 | 3.435064  |
| 29 | 1 | 1.430538  | -0.277123 | 3.891315  |
| 30 | 1 | 3.125375  | -0.611966 | 3.583970  |
| 31 | 1 | 3.198655  | 1.202991  | 1.874864  |
| 32 | 1 | 2.768674  | 1.786992  | 3.476298  |
| 33 | 1 | 0.275038  | 1.473553  | 3.901731  |
| 34 | 1 | 0.609109  | 3.163332  | 3.567346  |
| 35 | 1 | -1.191640 | 3.208588  | 1.846411  |
| 36 | 1 | -1.789265 | 2.797768  | 3.448340  |
| 37 | 1 | -1.445444 | 0.289777  | 3.891247  |
| 38 | 1 | -3.137959 | 0.625792  | 3.572246  |
| 39 | 1 | -3.200853 | -1.177426 | 1.853939  |
| 40 | 1 | -2.777647 | -1.772917 | 3.452960  |
| 41 | 1 | -0.682133 | -3.427861 | 0.832332  |
| 42 | 1 | 3.458913  | -0.649322 | 0.875432  |
| 43 | 1 | 0.680566  | 3.450267  | 0.848014  |
| 44 | 1 | -3.446324 | 0.679664  | 0.855612  |
| 45 | 8 | -0.051255 | -0.336615 | -2.328280 |
| 46 | 1 | 0.567129  | -1.082929 | -2.428302 |
| 47 | 1 | -0.933155 | -0.714696 | -2.490155 |
| 48 | 7 | -3.207581 | 3.200571  | -0.613997 |
| 49 | 7 | 3.217111  | 3.198777  | -0.594049 |
| 50 | 7 | 3.253675  | -3.169637 | -0.600713 |
| 51 | 7 | -3.240813 | -3.183243 | -0.586336 |
| 52 | 1 | -4.128283 | 3.504136  | -0.238922 |
| 53 | 1 | 3.517495  | 4.121782  | -0.222585 |
| 54 | 1 | 4.165072  | -3.481727 | -0.207949 |
| 55 | 1 | -3.555453 | -4.095430 | -0.197455 |
| 56 | 6 | -4.018515 | -2.944067 | -1.795478 |
| 57 | 1 | -3.365497 | -2.866128 | -2.670731 |
| 58 | 6 | -2.976404 | 3.948630  | -1.843107 |
| 59 | 1 | -2.865186 | 3.271446  | -2.695941 |
| 60 | 6 | 3.982941  | 2.953975  | -1.809474 |
| 61 | 1 | 3.318653  | 2.840757  | -2.672167 |
| 62 | 6 | 3.042371  | -3.916154 | -1.834527 |

|    |    |           |           |           |
|----|----|-----------|-----------|-----------|
| 63 | 1  | 2.962275  | -3.239137 | -2.691123 |
| 64 | 1  | -4.589048 | -2.013681 | -1.712509 |
| 65 | 1  | -2.064761 | 4.549763  | -1.766224 |
| 66 | 1  | 4.576862  | 2.039135  | -1.716378 |
| 67 | 1  | 2.121551  | -4.505281 | -1.778786 |
| 68 | 6  | -4.227529 | 4.871969  | -2.030852 |
| 69 | 8  | -5.103886 | 4.762698  | -1.117180 |
| 70 | 8  | -4.219116 | 5.601583  | -3.044438 |
| 71 | 6  | 4.916945  | 4.197852  | -1.992446 |
| 72 | 8  | 4.795925  | 5.084163  | -1.089971 |
| 73 | 8  | 5.665622  | 4.174687  | -2.991904 |
| 74 | 6  | 4.287172  | -4.854645 | -1.990280 |
| 75 | 8  | 4.293164  | -5.588292 | -3.000530 |
| 76 | 8  | 5.143518  | -4.750128 | -1.057301 |
| 77 | 6  | -4.982874 | -4.170502 | -1.938493 |
| 78 | 8  | -4.864317 | -5.041533 | -1.020861 |
| 79 | 8  | -5.747492 | -4.150092 | -2.925376 |
| 80 | 58 | 0.003111  | 0.016163  | 0.262136  |
| 81 | 1  | -2.194158 | -3.634140 | 1.734413  |
| 82 | 1  | 3.650566  | -2.176968 | 1.755348  |
| 83 | 1  | 2.198267  | 3.652737  | 1.742004  |
| 84 | 1  | -3.643108 | 2.206068  | 1.735432  |

E(RTPSSh) = -2386.2222416 Hartree

Zero-point correction = 0.667943 Hartree/particle

Sum of electronic and thermal Energies = -2385.506442 Hartree

Sum of electronic and thermal Enthalpies = -2385.505498 Hartree

Sum of electronic and thermal Free Energies = -2385.641236 Hartree

**Table S75.** [Pr(DOTA-(gly)<sub>4</sub>(H<sub>2</sub>O)]<sup>-</sup> [TSAP, Δ(δδδδ)], TPSSh/LCRECP/6-31G(d,p), aqueous solution (0 Imaginary Frequencies)

| Center Number | Atomic Number | Coordinates (Angstroms) |           |           |
|---------------|---------------|-------------------------|-----------|-----------|
|               |               | X                       | Y         | Z         |
| 1             | 7             | -1.153351               | -1.774704 | 2.030664  |
| 2             | 6             | -0.220761               | -2.209662 | 3.106945  |
| 3             | 6             | 1.210782                | -2.388991 | 2.613273  |
| 4             | 7             | 1.787932                | -1.139078 | 2.034168  |
| 5             | 6             | 2.203900                | -0.212330 | 3.123155  |
| 6             | 6             | 2.390847                | 1.222111  | 2.641006  |
| 7             | 7             | 1.150263                | 1.800371  | 2.043477  |
| 8             | 6             | 0.216991                | 2.234872  | 3.118588  |
| 9             | 6             | -1.214335               | 2.412292  | 2.623800  |
| 10            | 7             | -1.787697               | 1.163990  | 2.037157  |
| 11            | 6             | -2.211112               | 0.233379  | 3.118760  |
| 12            | 6             | -2.395775               | -1.198383 | 2.627762  |
| 13            | 6             | -1.527889               | -2.928373 | 1.177317  |
| 14            | 6             | -2.266387               | -2.427956 | -0.057589 |
| 15            | 8             | -1.964283               | -1.284707 | -0.531657 |
| 16            | 6             | 2.954372                | -1.499478 | 1.192649  |
| 17            | 6             | 2.477745                | -2.216249 | -0.063847 |
| 18            | 8             | 1.338733                | -1.914519 | -0.549634 |
| 19            | 6             | 1.525116                | 2.948540  | 1.183637  |
| 20            | 6             | 2.258860                | 2.434408  | -0.050400 |
| 21            | 8             | 1.971067                | 1.280338  | -0.501413 |
| 22            | 6             | -2.943988               | 1.528735  | 1.183933  |
| 23            | 6             | -2.443751               | 2.246988  | -0.064243 |
| 24            | 8             | -1.296447               | 1.950256  | -0.527389 |
| 25            | 1             | -0.255083               | -1.459035 | 3.899634  |
| 26            | 1             | -0.561687               | -3.152513 | 3.556799  |

|    |    |           |           |           |
|----|----|-----------|-----------|-----------|
| 27 | 1  | 1.244922  | -3.160448 | 1.839763  |
| 28 | 1  | 1.832411  | -2.748229 | 3.444988  |
| 29 | 1  | 1.439342  | -0.250277 | 3.902210  |
| 30 | 1  | 3.138688  | -0.555978 | 3.587684  |
| 31 | 1  | 3.176391  | 1.261264  | 1.882430  |
| 32 | 1  | 2.734104  | 1.839372  | 3.482550  |
| 33 | 1  | 0.251320  | 1.484163  | 3.911417  |
| 34 | 1  | 0.556129  | 3.178237  | 3.568904  |
| 35 | 1  | -1.248962 | 3.187423  | 1.854138  |
| 36 | 1  | -1.838600 | 2.765582  | 3.456092  |
| 37 | 1  | -1.451588 | 0.267505  | 3.903002  |
| 38 | 1  | -3.149065 | 0.574058  | 3.579125  |
| 39 | 1  | -3.178459 | -1.233083 | 1.865825  |
| 40 | 1  | -2.742133 | -1.820921 | 3.464080  |
| 41 | 1  | -0.615534 | -3.425915 | 0.833123  |
| 42 | 1  | 3.455168  | -0.581139 | 0.870636  |
| 43 | 1  | 0.613119  | 3.447209  | 0.840331  |
| 44 | 1  | -3.446107 | 0.613210  | 0.855885  |
| 45 | 8  | -0.048724 | -0.297575 | -2.286995 |
| 46 | 1  | 0.576768  | -1.036679 | -2.395706 |
| 47 | 1  | -0.927461 | -0.684290 | -2.446425 |
| 48 | 7  | -3.239328 | 3.130481  | -0.623363 |
| 49 | 7  | 3.147822  | 3.224806  | -0.608588 |
| 50 | 7  | 3.280203  | -3.099258 | -0.610986 |
| 51 | 7  | -3.168699 | -3.214964 | -0.596482 |
| 52 | 1  | -4.169534 | 3.418218  | -0.259374 |
| 53 | 1  | 3.430908  | 4.158935  | -0.251522 |
| 54 | 1  | 4.202165  | -3.394915 | -0.230215 |
| 55 | 1  | -3.464799 | -4.139192 | -0.221647 |
| 56 | 6  | -3.944483 | -2.977360 | -1.807234 |
| 57 | 1  | -3.288139 | -2.871952 | -2.677104 |
| 58 | 6  | -3.009109 | 3.877693  | -1.853193 |
| 59 | 1  | -2.875103 | 3.199239  | -2.701707 |
| 60 | 6  | 3.915505  | 2.977207  | -1.822314 |
| 61 | 1  | 3.251609  | 2.838783  | -2.681617 |
| 62 | 6  | 3.067619  | -3.847730 | -1.843424 |
| 63 | 1  | 2.965225  | -3.171146 | -2.697981 |
| 64 | 1  | -4.537333 | -2.061921 | -1.715134 |
| 65 | 1  | -2.110388 | 4.497016  | -1.768875 |
| 66 | 1  | 4.527234  | 2.075479  | -1.717519 |
| 67 | 1  | 2.158374  | -4.453539 | -1.777703 |
| 68 | 6  | -4.275844 | 4.775588  | -2.058824 |
| 69 | 8  | -5.159293 | 4.654441  | -1.153502 |
| 70 | 8  | -4.270901 | 5.499913  | -3.076197 |
| 71 | 6  | 4.824946  | 4.236043  | -2.025385 |
| 72 | 8  | 4.688413  | 5.133028  | -1.135733 |
| 73 | 8  | 5.572012  | 4.212675  | -3.026020 |
| 74 | 6  | 4.327378  | -4.763144 | -2.015461 |
| 75 | 8  | 4.334768  | -5.494972 | -3.026991 |
| 76 | 8  | 5.192622  | -4.644504 | -1.092410 |
| 77 | 6  | -4.878858 | -4.223978 | -1.973018 |
| 78 | 8  | -4.745670 | -5.104287 | -1.066310 |
| 79 | 8  | -5.637471 | -4.208052 | -2.964581 |
| 80 | 59 | 0.002160  | 0.017614  | 0.290184  |
| 81 | 1  | -2.126434 | -3.664850 | 1.729961  |
| 82 | 1  | 3.682607  | -2.106801 | 1.746723  |
| 83 | 1  | 2.129186  | 3.685868  | 1.729317  |
| 84 | 1  | -3.675917 | 2.138901  | 1.730041  |

-----  
E(RTPSSh) = -2386.8571702 Hartree

Zero-point correction = 0.668228 Hartree/particle

Sum of electronic and thermal Energies = -2386.141211 Hartree

Sum of electronic and thermal Enthalpies = -2386.140267 Hartree  
 Sum of electronic and thermal Free Energies = -2386.275453 Hartree

**Table S76.** [Nd(DOTA-(gly)<sub>4</sub>(H<sub>2</sub>O))]<sup>-</sup> [TSAP, Δ(δδδδ)], TPSSh/LCRECP/6-31G(d,p), aqueous solution (0 Imaginary Frequencies)

| Center Number | Atomic Number | Coordinates (Angstroms) |           |           |
|---------------|---------------|-------------------------|-----------|-----------|
|               |               | X                       | Y         | Z         |
| 1             | 7             | -1.138647               | -1.778470 | 2.037905  |
| 2             | 6             | -0.205658               | -2.213666 | 3.113458  |
| 3             | 6             | 1.226368                | -2.382741 | 2.618850  |
| 4             | 7             | 1.791988                | -1.127498 | 2.040033  |
| 5             | 6             | 2.207571                | -0.201703 | 3.129700  |
| 6             | 6             | 2.384524                | 1.233949  | 2.648477  |
| 7             | 7             | 1.138955                | 1.801720  | 2.051104  |
| 8             | 6             | 0.206449                | 2.235319  | 3.127039  |
| 9             | 6             | -1.226031               | 2.402938  | 2.633283  |
| 10            | 7             | -1.788847               | 1.149845  | 2.046673  |
| 11            | 6             | -2.209835               | 0.218796  | 3.128616  |
| 12            | 6             | -2.385328               | -1.213532 | 2.636924  |
| 13            | 6             | -1.505027               | -2.928527 | 1.176400  |
| 14            | 6             | -2.243555               | -2.420820 | -0.055160 |
| 15            | 8             | -1.949586               | -1.268959 | -0.513897 |
| 16            | 6             | 2.955136                | -1.478474 | 1.190353  |
| 17            | 6             | 2.471500                | -2.192741 | -0.064569 |
| 18            | 8             | 1.324128                | -1.898324 | -0.535589 |
| 19            | 6             | 1.505194                | 2.947191  | 1.184021  |
| 20            | 6             | 2.237812                | 2.426667  | -0.047778 |
| 21            | 8             | 1.958005                | 1.264839  | -0.483998 |
| 22            | 6             | -2.943764               | 1.505962  | 1.188123  |
| 23            | 6             | -2.439343               | 2.222282  | -0.059086 |
| 24            | 8             | -1.285163               | 1.932912  | -0.509914 |
| 25            | 1             | -0.244380               | -1.466256 | 3.909047  |
| 26            | 1             | -0.542391               | -3.160057 | 3.558926  |
| 27            | 1             | 1.265120                | -3.153321 | 1.844758  |
| 28            | 1             | 1.852177                | -2.737620 | 3.449228  |
| 29            | 1             | 1.445819                | -0.245147 | 3.911287  |
| 30            | 1             | 3.145806                | -0.541563 | 3.589974  |
| 31            | 1             | 3.169773                | 1.278866  | 1.890013  |
| 32            | 1             | 2.722755                | 1.854197  | 3.489763  |
| 33            | 1             | 0.246253                | 1.487005  | 3.921941  |
| 34            | 1             | 0.541872                | 3.181782  | 3.573490  |
| 35            | 1             | -1.266302               | 3.177777  | 1.863665  |
| 36            | 1             | -1.853265               | 2.751224  | 3.465371  |
| 37            | 1             | -1.451676               | 0.257383  | 3.914031  |
| 38            | 1             | -3.150340               | 0.555170  | 3.586832  |
| 39            | 1             | -3.168610               | -1.252907 | 1.875913  |
| 40            | 1             | -2.725793               | -1.840116 | 3.472559  |
| 41            | 1             | -0.589468               | -3.418408 | 0.829938  |
| 42            | 1             | 3.448809                | -0.556574 | 0.867874  |
| 43            | 1             | 0.589831                | 3.439001  | 0.840033  |
| 44            | 1             | -3.439712               | 0.587121  | 0.860307  |
| 45            | 8             | -0.048145               | -0.257888 | -2.250508 |
| 46            | 1             | 0.573780                | -0.998339 | -2.369581 |
| 47            | 1             | -0.928879               | -0.639246 | -2.412017 |
| 48            | 7             | -3.236717               | 3.096465  | -0.629898 |
| 49            | 7             | 3.117963                | 3.217699  | -0.618597 |
| 50            | 7             | 3.274991                | -3.066125 | -0.625113 |
| 51            | 7             | -3.137620               | -3.208293 | -0.606510 |
| 52            | 1             | -4.172995               | 3.377559  | -0.276330 |



|    |    |           |           |           |
|----|----|-----------|-----------|-----------|
| 53 | 1  | 3.394764  | 4.158177  | -0.273319 |
| 54 | 1  | 4.202999  | -3.356809 | -0.255012 |
| 55 | 1  | -3.427234 | -4.139531 | -0.243840 |
| 56 | 6  | -3.912464 | -2.962494 | -1.816267 |
| 57 | 1  | -3.255013 | -2.841607 | -2.683266 |
| 58 | 6  | -3.001952 | 3.838933  | -1.861766 |
| 59 | 1  | -2.852278 | 3.157059  | -2.704875 |
| 60 | 6  | 3.883429  | 2.962543  | -1.832184 |
| 61 | 1  | 3.217754  | 2.809228  | -2.687569 |
| 62 | 6  | 3.055381  | -3.811884 | -1.857981 |
| 63 | 1  | 2.941354  | -3.133268 | -2.709443 |
| 64 | 1  | -4.512934 | -2.053051 | -1.714750 |
| 65 | 1  | -2.110704 | 4.468247  | -1.772113 |
| 66 | 1  | 4.502737  | 2.066974  | -1.719433 |
| 67 | 1  | 2.150462  | -4.423382 | -1.785930 |
| 68 | 6  | -4.275922 | 4.722279  | -2.085149 |
| 69 | 8  | -5.166337 | 4.598064  | -1.187076 |
| 70 | 8  | -4.269063 | 5.439794  | -3.107298 |
| 71 | 6  | 4.782051  | 4.226284  | -2.052395 |
| 72 | 8  | 4.640675  | 5.132294  | -1.172670 |
| 73 | 8  | 5.526484  | 4.197490  | -3.054820 |
| 74 | 6  | 4.319254  | -4.718931 | -2.044408 |
| 75 | 8  | 4.321747  | -5.448141 | -3.057794 |
| 76 | 8  | 5.192440  | -4.596961 | -1.129268 |
| 77 | 6  | -4.836265 | -4.214715 | -1.998777 |
| 78 | 8  | -4.696893 | -5.104880 | -1.102641 |
| 79 | 8  | -5.593645 | -4.192981 | -2.991113 |
| 80 | 60 | 0.002926  | 0.018480  | 0.314767  |
| 81 | 1  | -2.101204 | -3.671861 | 1.722309  |
| 82 | 1  | 3.689812  | -2.084641 | 1.737069  |
| 83 | 1  | 2.107654  | 3.690441  | 1.723323  |
| 84 | 1  | -3.680680 | 2.114732  | 1.728980  |

E (RTPSSh) = -2387.4797495 Hartree

Zero-point correction = 0.668445 Hartree/particle

Sum of electronic and thermal Energies = -2386.763680 Hartree

Sum of electronic and thermal Enthalpies = -2386.762736 Hartree

Sum of electronic and thermal Free Energies = -2386.897563 Hartree

**Table S77.** [Sm(DOTA-(gly)<sub>4</sub>(H<sub>2</sub>O))]<sup>-</sup> [TSAP, Δ(δδδδ)], TPSSh/LCRECP/6-31G(d,p), aqueous solution (0 Imaginary Frequencies)

| Center Number | Atomic Number | Coordinates (Angstroms) |           |           |
|---------------|---------------|-------------------------|-----------|-----------|
|               |               | X                       | Y         | Z         |
| 1             | 7             | -1.118796               | -1.785883 | 2.045588  |
| 2             | 6             | -0.187411               | -2.227856 | 3.119247  |
| 3             | 6             | 1.244732                | -2.383196 | 2.623098  |
| 4             | 7             | 1.795192                | -1.119448 | 2.048144  |
| 5             | 6             | 2.212455                | -0.199398 | 3.141589  |
| 6             | 6             | 2.377628                | 1.238482  | 2.665068  |
| 7             | 7             | 1.125773                | 1.793680  | 2.068588  |
| 8             | 6             | 0.196040                | 2.226753  | 3.146754  |
| 9             | 6             | -1.237265               | 2.383555  | 2.654264  |
| 10            | 7             | -1.785314               | 1.125472  | 2.064294  |
| 11            | 6             | -2.206502               | 0.193472  | 3.144884  |
| 12            | 6             | -2.370956               | -1.237928 | 2.649034  |
| 13            | 6             | -1.476093               | -2.926338 | 1.167991  |
| 14            | 6             | -2.212699               | -2.399504 | -0.055881 |
| 15            | 8             | -1.924970               | -1.234731 | -0.486381 |
| 16            | 6             | 2.952866                | -1.457250 | 1.186390  |

|    |   |           |           |           |
|----|---|-----------|-----------|-----------|
| 17 | 6 | 2.456589  | -2.160878 | -0.068845 |
| 18 | 8 | 1.296650  | -1.873716 | -0.514293 |
| 19 | 6 | 1.482057  | 2.935683  | 1.193043  |
| 20 | 6 | 2.209517  | 2.404964  | -0.036891 |
| 21 | 8 | 1.940339  | 1.231708  | -0.449044 |
| 22 | 6 | -2.935957 | 1.473320  | 1.197099  |
| 23 | 6 | -2.420337 | 2.186741  | -0.046421 |
| 24 | 8 | -1.254527 | 1.908084  | -0.473951 |
| 25 | 1 | -0.231269 | -1.488125 | 3.921842  |
| 26 | 1 | -0.520621 | -3.180213 | 3.554380  |
| 27 | 1 | 1.288856  | -3.150348 | 1.846002  |
| 28 | 1 | 1.876317  | -2.734832 | 3.450323  |
| 29 | 1 | 1.454816  | -0.251319 | 3.926772  |
| 30 | 1 | 3.154929  | -0.537119 | 3.594585  |
| 31 | 1 | 3.162750  | 1.292161  | 1.907197  |
| 32 | 1 | 2.708967  | 1.860941  | 3.507276  |
| 33 | 1 | 0.242202  | 1.480797  | 3.943641  |
| 34 | 1 | 0.528314  | 3.176308  | 3.588763  |
| 35 | 1 | -1.284212 | 3.159840  | 1.886594  |
| 36 | 1 | -1.869186 | 2.723086  | 3.486258  |
| 37 | 1 | -1.451249 | 0.235397  | 3.933033  |
| 38 | 1 | -3.150472 | 0.525084  | 3.599273  |
| 39 | 1 | -3.155406 | -1.281209 | 1.889555  |
| 40 | 1 | -2.703216 | -1.872237 | 3.481966  |
| 41 | 1 | -0.557445 | -3.406566 | 0.816846  |
| 42 | 1 | 3.440164  | -0.530989 | 0.867645  |
| 43 | 1 | 0.563244  | 3.421470  | 0.850439  |
| 44 | 1 | -3.425539 | 0.551851  | 0.867976  |
| 45 | 8 | -0.040255 | -0.196935 | -2.184762 |
| 46 | 1 | 0.568540  | -0.946791 | -2.312742 |
| 47 | 1 | -0.927021 | -0.560537 | -2.353641 |
| 48 | 7 | -3.216779 | 3.047826  | -0.637637 |
| 49 | 7 | 3.075247  | 3.195579  | -0.629454 |
| 50 | 7 | 3.258847  | -3.018079 | -0.654788 |
| 51 | 7 | -3.099525 | -3.179444 | -0.628395 |
| 52 | 1 | -4.163604 | 3.318270  | -0.304365 |
| 53 | 1 | 3.342644  | 4.145851  | -0.304029 |
| 54 | 1 | 4.195713  | -3.304417 | -0.303431 |
| 55 | 1 | -3.384655 | -4.120579 | -0.287849 |
| 56 | 6 | -3.873820 | -2.910978 | -1.833707 |
| 57 | 1 | -3.215838 | -2.768678 | -2.697008 |
| 58 | 6 | -2.969587 | 3.782654  | -1.871674 |
| 59 | 1 | -2.791402 | 3.095615  | -2.704940 |
| 60 | 6 | 3.832498  | 2.928661  | -1.845673 |
| 61 | 1 | 3.160871  | 2.749798  | -2.691357 |
| 62 | 6 | 3.026009  | -3.753495 | -1.891456 |
| 63 | 1 | 2.895737  | -3.067704 | -2.734809 |
| 64 | 1 | -4.478508 | -2.006665 | -1.713493 |
| 65 | 1 | -2.091037 | 4.427863  | -1.770272 |
| 66 | 1 | 4.465903  | 2.044385  | -1.722530 |
| 67 | 1 | 2.126342  | -4.371741 | -1.812391 |
| 68 | 6 | -4.253483 | 4.642170  | -2.128907 |
| 69 | 8 | -5.158964 | 4.512056  | -1.246851 |
| 70 | 8 | -4.238780 | 5.349266  | -3.158197 |
| 71 | 6 | 4.710549  | 4.200860  | -2.098018 |
| 72 | 8 | 4.564361  | 5.120889  | -1.233738 |
| 73 | 8 | 5.445760  | 4.164241  | -3.106952 |
| 74 | 6 | 4.293640  | -4.649554 | -2.104746 |
| 75 | 8 | 4.285990  | -5.370804 | -3.123684 |
| 76 | 8 | 5.180015  | -4.527571 | -1.202324 |
| 77 | 6 | -4.791297 | -4.163569 | -2.044255 |
| 78 | 8 | -4.646275 | -5.073114 | -1.168639 |

|    |    |           |           |           |
|----|----|-----------|-----------|-----------|
| 79 | 8  | -5.549514 | -4.123485 | -3.035299 |
| 80 | 62 | 0.006433  | 0.017458  | 0.356208  |
| 81 | 1  | -2.071533 | -3.679608 | 1.700753  |
| 82 | 1  | 3.693902  | -2.066977 | 1.720254  |
| 83 | 1  | 2.085725  | 3.684185  | 1.723489  |
| 84 | 1  | -3.678755 | 2.082065  | 1.729726  |

E(RTPSSh) = -2388.7016232 Hartree

Zero-point correction = 0.668791 Hartree/particle

Sum of electronic and thermal Energies = -2387.985379 Hartree

Sum of electronic and thermal Enthalpies = -2387.984435 Hartree

Sum of electronic and thermal Free Energies = -2388.118854 Hartree

**Table S78.** [Eu(DOTA-(gly)<sub>4</sub>(H<sub>2</sub>O)]<sup>-</sup> [TSAP, Δ(δδδδ)], TPSSh/LCRECP/6-31G(d,p), aqueous solution (0 Imaginary Frequencies)

| Center Number | Atomic Number | Coordinates (Angstroms) |           |           |
|---------------|---------------|-------------------------|-----------|-----------|
|               |               | X                       | Y         | Z         |
| 1             | 7             | -1.112840               | -1.790117 | 2.048511  |
| 2             | 6             | -0.183723               | -2.238775 | 3.121101  |
| 3             | 6             | 1.248337                | -2.390316 | 2.624778  |
| 4             | 7             | 1.794889                | -1.123132 | 2.053805  |
| 5             | 6             | 2.214882                | -0.208254 | 3.150281  |
| 6             | 6             | 2.377872                | 1.230896  | 2.677849  |
| 7             | 7             | 1.124382                | 1.783798  | 2.082622  |
| 8             | 6             | 0.196749                | 2.216988  | 3.162330  |
| 9             | 6             | -1.236503               | 2.372834  | 2.670462  |
| 10            | 7             | -1.780317               | 1.114832  | 2.076514  |
| 11            | 6             | -2.204309               | 0.181415  | 3.154506  |
| 12            | 6             | -2.366627               | -1.248259 | 2.654031  |
| 13            | 6             | -1.467880               | -2.923986 | 1.161697  |
| 14            | 6             | -2.200976               | -2.385068 | -0.058700 |
| 15            | 8             | -1.913485               | -1.214409 | -0.473839 |
| 16            | 6             | 2.949324                | -1.456232 | 1.186269  |
| 17            | 6             | 2.445688                | -2.150961 | -0.070714 |
| 18            | 8             | 1.279717                | -1.865931 | -0.502164 |
| 19            | 6             | 1.478493                | 2.924638  | 1.204873  |
| 20            | 6             | 2.200449                | 2.389588  | -0.026239 |
| 21            | 8             | 1.935774                | 1.211148  | -0.426675 |
| 22            | 6             | -2.927565               | 1.463069  | 1.205246  |
| 23            | 6             | -2.404212               | 2.174844  | -0.035731 |
| 24            | 8             | -1.232410               | 1.900946  | -0.450024 |
| 25            | 1             | -0.228562               | -1.503560 | 3.927841  |
| 26            | 1             | -0.517722               | -3.193642 | 3.550006  |
| 27            | 1             | 1.293558                | -3.154784 | 1.845168  |
| 28            | 1             | 1.881291                | -2.743049 | 3.450420  |
| 29            | 1             | 1.458882                | -0.263346 | 3.936888  |
| 30            | 1             | 3.158450                | -0.547740 | 3.599597  |
| 31            | 1             | 3.162957                | 1.287911  | 1.920261  |
| 32            | 1             | 2.707385                | 1.852458  | 3.521362  |
| 33            | 1             | 0.243923                | 1.470661  | 3.958856  |
| 34            | 1             | 0.529644                | 3.166474  | 3.603922  |
| 35            | 1             | -1.284760               | 3.151340  | 1.905191  |
| 36            | 1             | -1.869915               | 2.708006  | 3.503023  |
| 37            | 1             | -1.450641               | 0.221631  | 3.944308  |
| 38            | 1             | -3.149326               | 0.512150  | 3.607262  |
| 39            | 1             | -3.151189               | -1.290207 | 1.894639  |
| 40            | 1             | -2.697057               | -1.886775 | 3.484402  |
| 41            | 1             | -0.548580               | -3.401416 | 0.808772  |
| 42            | 1             | 3.436384                | -0.528655 | 0.871451  |

|    |    |           |           |           |
|----|----|-----------|-----------|-----------|
| 43 | 1  | 0.559160  | 3.411044  | 0.864910  |
| 44 | 1  | -3.416789 | 0.542117  | 0.874544  |
| 45 | 8  | -0.034303 | -0.167278 | -2.153862 |
| 46 | 1  | 0.568926  | -0.920821 | -2.286549 |
| 47 | 1  | -0.923780 | -0.523948 | -2.323561 |
| 48 | 7  | -3.199023 | 3.029353  | -0.638314 |
| 49 | 7  | 3.056782  | 3.180717  | -0.631346 |
| 50 | 7  | 3.246772  | -2.998504 | -0.671811 |
| 51 | 7  | -3.084777 | -3.159155 | -0.643295 |
| 52 | 1  | -4.151795 | 3.293689  | -0.317134 |
| 53 | 1  | 3.318250  | 4.136358  | -0.316784 |
| 54 | 1  | 4.188343  | -3.282960 | -0.331236 |
| 55 | 1  | -3.369942 | -4.104613 | -0.314403 |
| 56 | 6  | -3.857544 | -2.877797 | -1.846690 |
| 57 | 1  | -3.198661 | -2.726276 | -2.707721 |
| 58 | 6  | -2.944622 | 3.759245  | -1.873882 |
| 59 | 1  | -2.749264 | 3.069087  | -2.700667 |
| 60 | 6  | 3.804809  | 2.910723  | -1.852646 |
| 61 | 1  | 3.126843  | 2.715255  | -2.689506 |
| 62 | 6  | 3.007575  | -3.724841 | -1.912670 |
| 63 | 1  | 2.867430  | -3.032932 | -2.749428 |
| 64 | 1  | -4.462715 | -1.975063 | -1.717538 |
| 65 | 1  | -2.074211 | 4.414377  | -1.766001 |
| 66 | 1  | 4.450347  | 2.035553  | -1.727319 |
| 67 | 1  | 2.111800  | -4.348434 | -1.831676 |
| 68 | 6  | -4.234305 | 4.603670  | -2.151599 |
| 69 | 8  | -5.148359 | 4.470106  | -1.278941 |
| 70 | 8  | -4.215180 | 5.303848  | -3.185511 |
| 71 | 6  | 4.664726  | 4.190949  | -2.126359 |
| 72 | 8  | 4.517779  | 5.116664  | -1.268295 |
| 73 | 8  | 5.388369  | 4.154204  | -3.143579 |
| 74 | 6  | 4.278329  | -4.612312 | -2.143419 |
| 75 | 8  | 4.266423  | -5.325306 | -3.168045 |
| 76 | 8  | 5.171290  | -4.492403 | -1.247211 |
| 77 | 6  | -4.774165 | -4.128644 | -2.071618 |
| 78 | 8  | -4.628489 | -5.047798 | -1.206161 |
| 79 | 8  | -5.532104 | -4.078172 | -3.062330 |
| 80 | 63 | 0.009383  | 0.016121  | 0.378065  |
| 81 | 1  | -2.065355 | -3.680994 | 1.686745  |
| 82 | 1  | 3.691401  | -2.070734 | 1.713122  |
| 83 | 1  | 2.085616  | 3.672788  | 1.731808  |
| 84 | 1  | -3.671523 | 2.073471  | 1.734296  |

E(RTPSSh) = -2389.2984991 Hartree

Zero-point correction = 0.668880 Hartree/particle

Sum of electronic and thermal Energies = -2388.582213 Hartree

Sum of electronic and thermal Enthalpies = -2388.581269 Hartree

Sum of electronic and thermal Free Energies = -2388.715821 Hartree

**Table S79.** [Gd(DOTA-(gly)<sub>4</sub>(H<sub>2</sub>O)]<sup>-</sup> [TSAP, Δ(δδδδ)], TPSSh/LCRECP/6-31G(d,p), aqueous solution (0 Imaginary Frequencies)

| Center Number | Atomic Number | Coordinates (Angstroms) |           |          |
|---------------|---------------|-------------------------|-----------|----------|
|               |               | X                       | Y         | Z        |
| 1             | 7             | -1.109892               | -1.796873 | 2.049431 |
| 2             | 6             | -0.184094               | -2.251781 | 3.122055 |
| 3             | 6             | 1.248537                | -2.399823 | 2.627353 |
| 4             | 7             | 1.792556                | -1.129376 | 2.061359 |
| 5             | 6             | 2.213620                | -0.219675 | 3.161512 |
| 6             | 6             | 2.375200                | 1.220846  | 2.693653 |

|    |   |           |           |           |
|----|---|-----------|-----------|-----------|
| 7  | 7 | 1.120895  | 1.772178  | 2.098696  |
| 8  | 6 | 0.193808  | 2.204262  | 3.179138  |
| 9  | 6 | -1.238799 | 2.359850  | 2.686252  |
| 10 | 7 | -1.778199 | 1.102571  | 2.086853  |
| 11 | 6 | -2.206234 | 0.167013  | 3.161155  |
| 12 | 6 | -2.365961 | -1.260722 | 2.655269  |
| 13 | 6 | -1.461774 | -2.924636 | 1.153802  |
| 14 | 6 | -2.189846 | -2.374826 | -0.064448 |
| 15 | 8 | -1.902277 | -1.198933 | -0.465072 |
| 16 | 6 | 2.945332  | -1.457945 | 1.190245  |
| 17 | 6 | 2.437085  | -2.143005 | -0.069959 |
| 18 | 8 | 1.266081  | -1.860491 | -0.489709 |
| 19 | 6 | 1.474036  | 2.913014  | 1.220758  |
| 20 | 6 | 2.191172  | 2.375836  | -0.012097 |
| 21 | 8 | 1.931494  | 1.193165  | -0.403435 |
| 22 | 6 | -2.921242 | 1.452158  | 1.210789  |
| 23 | 6 | -2.389253 | 2.163572  | -0.026521 |
| 24 | 8 | -1.211938 | 1.893932  | -0.427982 |
| 25 | 1 | -0.230799 | -1.520847 | 3.932622  |
| 26 | 1 | -0.519319 | -3.208979 | 3.544694  |
| 27 | 1 | 1.295674  | -3.161415 | 1.845101  |
| 28 | 1 | 1.881551  | -2.754044 | 3.452246  |
| 29 | 1 | 1.458135  | -0.278032 | 3.948423  |
| 30 | 1 | 3.157631  | -0.560918 | 3.608492  |
| 31 | 1 | 3.160854  | 1.281181  | 1.936972  |
| 32 | 1 | 2.702382  | 1.841105  | 3.538965  |
| 33 | 1 | 0.240862  | 1.456678  | 3.974518  |
| 34 | 1 | 0.526732  | 3.153172  | 3.621850  |
| 35 | 1 | -1.287272 | 3.141093  | 1.923845  |
| 36 | 1 | -1.874507 | 2.690282  | 3.518888  |
| 37 | 1 | -1.455105 | 0.205066  | 3.953516  |
| 38 | 1 | -3.152821 | 0.496638  | 3.611343  |
| 39 | 1 | -3.149409 | -1.300825 | 1.894666  |
| 40 | 1 | -2.696070 | -1.903514 | 3.482391  |
| 41 | 1 | -0.541469 | -3.399719 | 0.800642  |
| 42 | 1 | 3.433296  | -0.529155 | 0.880818  |
| 43 | 1 | 0.554672  | 3.401027  | 0.883530  |
| 44 | 1 | -3.409893 | 0.532052  | 0.877233  |
| 45 | 8 | -0.026740 | -0.143906 | -2.126135 |
| 46 | 1 | 0.572098  | -0.900301 | -2.262506 |
| 47 | 1 | -0.918277 | -0.495338 | -2.296360 |
| 48 | 7 | -3.181289 | 3.013338  | -0.639187 |
| 49 | 7 | 3.038065  | 3.168706  | -0.627902 |
| 50 | 7 | 3.238594  | -2.979652 | -0.685356 |
| 51 | 7 | -3.069743 | -3.143701 | -0.661357 |
| 52 | 1 | -4.139362 | 3.272519  | -0.329659 |
| 53 | 1 | 3.292108  | 4.129531  | -0.323088 |
| 54 | 1 | 4.184980  | -3.260507 | -0.354981 |
| 55 | 1 | -3.355084 | -4.093062 | -0.343530 |
| 56 | 6 | -3.839214 | -2.850979 | -1.864204 |
| 57 | 1 | -3.178169 | -2.691214 | -2.722084 |
| 58 | 6 | -2.918120 | 3.740388  | -1.874655 |
| 59 | 1 | -2.707830 | 3.048552  | -2.696343 |
| 60 | 6 | 3.775370  | 2.898587  | -1.855740 |
| 61 | 1 | 3.090404  | 2.684728  | -2.682260 |
| 62 | 6 | 2.996539  | -3.693873 | -1.932731 |
| 63 | 1 | 2.844325  | -2.993846 | -2.760594 |
| 64 | 1 | -4.445225 | -1.949858 | -1.728108 |
| 65 | 1 | -2.054201 | 4.402794  | -1.759308 |
| 66 | 1 | 4.436053  | 2.034783  | -1.730207 |
| 67 | 1 | 2.107085  | -4.326535 | -1.852480 |
| 68 | 6 | -4.211073 | 4.573556  | -2.170674 |

|    |    |           |           |           |
|----|----|-----------|-----------|-----------|
| 69 | 8  | -5.134085 | 4.436157  | -1.308095 |
| 70 | 8  | -4.185402 | 5.269826  | -3.207063 |
| 71 | 6  | 4.612092  | 4.189225  | -2.151733 |
| 72 | 8  | 4.464736  | 5.118849  | -1.297987 |
| 73 | 8  | 5.320571  | 4.155548  | -3.179645 |
| 74 | 6  | 4.273713  | -4.566996 | -2.182857 |
| 75 | 8  | 4.261635  | -5.266948 | -3.216377 |
| 76 | 8  | 5.171334  | -4.450168 | -1.290918 |
| 77 | 6  | -4.754411 | -4.100343 | -2.103453 |
| 78 | 8  | -4.609527 | -5.027820 | -1.246763 |
| 79 | 8  | -5.510322 | -4.040861 | -3.095148 |
| 80 | 64 | 0.011763  | 0.013071  | 0.398213  |
| 81 | 1  | -2.062028 | -3.684802 | 1.670985  |
| 82 | 1  | 3.687091  | -2.077671 | 1.711390  |
| 83 | 1  | 2.084497  | 3.659708  | 1.745874  |
| 84 | 1  | -3.666713 | 2.063747  | 1.736282  |

E(RTPSSh) = -2389.8883268 Hartree

Zero-point correction = 0.668996 Hartree/particle

Sum of electronic and thermal Energies = -2389.171989 Hartree

Sum of electronic and thermal Enthalpies = -2389.171045 Hartree

Sum of electronic and thermal Free Energies = -2389.305377 Hartree

**Table S80.** [Tb(DOTA-(gly)<sub>4</sub>(H<sub>2</sub>O))<sup>-</sup>] [TSAP,  $\Delta(\delta\delta\delta\delta)$ ], TPSSh/LCRECP/6-31G(d,p), aqueous solution (0 Imaginary Frequencies)

| Center<br>Number | Atomic<br>Number | Coordinates (Angstroms) |           |           |
|------------------|------------------|-------------------------|-----------|-----------|
|                  |                  | X                       | Y         | Z         |
| 1                | 7                | -1.106082               | -1.797955 | 2.051189  |
| 2                | 6                | -0.182641               | -2.254266 | 3.124950  |
| 3                | 6                | 1.250566                | -2.397648 | 2.631740  |
| 4                | 7                | 1.789202                | -1.124738 | 2.066133  |
| 5                | 6                | 2.209944                | -0.216191 | 3.167114  |
| 6                | 6                | 2.367241                | 1.224529  | 2.699508  |
| 7                | 7                | 1.111153                | 1.769949  | 2.102659  |
| 8                | 6                | 0.184213                | 2.203294  | 3.182474  |
| 9                | 6                | -1.248031               | 2.354137  | 2.688237  |
| 10               | 7                | -1.780804               | 1.094361  | 2.088096  |
| 11               | 6                | -2.210672               | 0.159904  | 3.162347  |
| 12               | 6                | -2.365175               | -1.267905 | 2.656152  |
| 13               | 6                | -1.453756               | -2.923260 | 1.150996  |
| 14               | 6                | -2.178283               | -2.367393 | -0.066132 |
| 15               | 8                | -1.890845               | -1.188149 | -0.457223 |
| 16               | 6                | 2.940862                | -1.449908 | 1.192493  |
| 17               | 6                | 2.428494                | -2.131343 | -0.067596 |
| 18               | 8                | 1.253860                | -1.850741 | -0.479040 |
| 19               | 6                | 1.462011                | 2.908506  | 1.220874  |
| 20               | 6                | 2.178918                | 2.365070  | -0.008952 |
| 21               | 8                | 1.921104                | 1.178954  | -0.391069 |
| 22               | 6                | -2.921097               | 1.440570  | 1.207227  |
| 23               | 6                | -2.382262               | 2.149892  | -0.027817 |
| 24               | 8                | -1.201748               | 1.880504  | -0.420093 |
| 25               | 1                | -0.232336               | -1.525381 | 3.937247  |
| 26               | 1                | -0.517184               | -3.213122 | 3.544300  |
| 27               | 1                | 1.300856                | -3.159029 | 1.849492  |
| 28               | 1                | 1.884893                | -2.749373 | 3.456632  |
| 29               | 1                | 1.455407                | -0.276996 | 3.954810  |
| 30               | 1                | 3.155180                | -0.556029 | 3.612501  |
| 31               | 1                | 3.153759                | 1.287439  | 1.943957  |
| 32               | 1                | 2.690660                | 1.846845  | 3.544678  |

|    |    |           |           |           |
|----|----|-----------|-----------|-----------|
| 33 | 1  | 0.232762  | 1.457638  | 3.979632  |
| 34 | 1  | 0.515538  | 3.153886  | 3.622680  |
| 35 | 1  | -1.298238 | 3.135226  | 1.925790  |
| 36 | 1  | -1.886621 | 2.681963  | 3.519625  |
| 37 | 1  | -1.462081 | 0.200202  | 3.957059  |
| 38 | 1  | -3.159339 | 0.488222  | 3.609033  |
| 39 | 1  | -3.147840 | -1.310393 | 1.894880  |
| 40 | 1  | -2.693375 | -1.912894 | 3.482253  |
| 41 | 1  | -0.532293 | -3.396540 | 0.798825  |
| 42 | 1  | 3.428106  | -0.520388 | 0.884562  |
| 43 | 1  | 0.542176  | 3.394407  | 0.882299  |
| 44 | 1  | -3.407675 | 0.519667  | 0.873264  |
| 45 | 8  | -0.020497 | -0.124972 | -2.099761 |
| 46 | 1  | 0.570337  | -0.887314 | -2.237488 |
| 47 | 1  | -0.914726 | -0.465235 | -2.277375 |
| 48 | 7  | -3.169517 | 2.999047  | -0.647296 |
| 49 | 7  | 3.025114  | 3.153929  | -0.630690 |
| 50 | 7  | 3.228040  | -2.963785 | -0.690870 |
| 51 | 7  | -3.056021 | -3.132343 | -0.670958 |
| 52 | 1  | -4.129983 | 3.258326  | -0.345540 |
| 53 | 1  | 3.278008  | 4.117357  | -0.333419 |
| 54 | 1  | 4.177525  | -3.242890 | -0.367815 |
| 55 | 1  | -3.341793 | -4.084084 | -0.360644 |
| 56 | 6  | -3.822681 | -2.831235 | -1.873513 |
| 57 | 1  | -3.159661 | -2.665814 | -2.728797 |
| 58 | 6  | -2.896360 | 3.725070  | -1.881163 |
| 59 | 1  | -2.680265 | 3.032512  | -2.700726 |
| 60 | 6  | 3.762744  | 2.874661  | -1.856252 |
| 61 | 1  | 3.077982  | 2.653962  | -2.681119 |
| 62 | 6  | 2.980302  | -3.673863 | -1.939489 |
| 63 | 1  | 2.820338  | -2.971152 | -2.763619 |
| 64 | 1  | -4.428646 | -1.930825 | -1.732647 |
| 65 | 1  | -2.032704 | 4.386703  | -1.759596 |
| 66 | 1  | 4.423675  | 2.012067  | -1.723867 |
| 67 | 1  | 2.093506  | -4.309818 | -1.855971 |
| 68 | 6  | -4.186231 | 4.559116  | -2.187785 |
| 69 | 8  | -5.116615 | 4.421908  | -1.333121 |
| 70 | 8  | -4.151469 | 5.255688  | -3.223729 |
| 71 | 6  | 4.599034  | 4.163202  | -2.162265 |
| 72 | 8  | 4.450482  | 5.099847  | -1.316429 |
| 73 | 8  | 5.308280  | 4.121482  | -3.189382 |
| 74 | 6  | 4.258905  | -4.541481 | -2.201330 |
| 75 | 8  | 4.242267  | -5.238227 | -3.236927 |
| 76 | 8  | 5.162247  | -4.424039 | -1.315230 |
| 77 | 6  | -4.737508 | -4.078818 | -2.123320 |
| 78 | 8  | -4.593594 | -5.012629 | -1.273340 |
| 79 | 8  | -5.492074 | -4.012217 | -3.115577 |
| 80 | 65 | 0.010808  | 0.012014  | 0.411526  |
| 81 | 1  | -2.055625 | -3.685403 | 1.663310  |
| 82 | 1  | 3.683505  | -2.071450 | 1.710172  |
| 83 | 1  | 2.072570  | 3.657376  | 1.742696  |
| 84 | 1  | -3.668915 | 2.053051  | 1.728275  |

-----  
E (RTPSSh) = -2390.4781089 Hartree  
Zero-point correction = 0.669161 Hartree/particle  
Sum of electronic and thermal Energies = -2389.761678 Hartree  
Sum of electronic and thermal Enthalpies = -2389.760733 Hartree  
Sum of electronic and thermal Free Energies = -2389.894718 Hartree

**Table S81.** [Dy(DOTA-(gly)<sub>4</sub>(H<sub>2</sub>O))<sup>-</sup>] [TSAP, Δ(δδδδ)], TPSSh/LCRECP/6-31G(d,p), aqueous solution (0 Imaginary Frequencies)

| Center<br>Number | Atomic<br>Number | Coordinates (Angstroms) |           |           |
|------------------|------------------|-------------------------|-----------|-----------|
|                  |                  | X                       | Y         | Z         |
| 1                | 7                | -1.110806               | -1.793172 | 2.053889  |
| 2                | 6                | -0.191656               | -2.255525 | 3.128503  |
| 3                | 6                | 1.241312                | -2.401958 | 2.636563  |
| 4                | 7                | 1.781367                | -1.129504 | 2.071379  |
| 5                | 6                | 2.207190                | -0.224401 | 3.172986  |
| 6                | 6                | 2.367656                | 1.215793  | 2.705802  |
| 7                | 7                | 1.112388                | 1.762156  | 2.108001  |
| 8                | 6                | 0.188122                | 2.200957  | 3.187689  |
| 9                | 6                | -1.243245               | 2.355028  | 2.692895  |
| 10               | 7                | -1.776592               | 1.096030  | 2.091669  |
| 11               | 6                | -2.212855               | 0.164236  | 3.165385  |
| 12               | 6                | -2.369969               | -1.262627 | 2.658245  |
| 13               | 6                | -1.459850               | -2.914151 | 1.149046  |
| 14               | 6                | -2.178150               | -2.349056 | -0.067141 |
| 15               | 8                | -1.886842               | -1.167149 | -0.447701 |
| 16               | 6                | 2.929574                | -1.457139 | 1.194384  |
| 17               | 6                | 2.408749                | -2.132448 | -0.065261 |
| 18               | 8                | 1.230924                | -1.849524 | -0.466410 |
| 19               | 6                | 1.466179                | 2.896945  | 1.222594  |
| 20               | 6                | 2.178767                | 2.344560  | -0.005478 |
| 21               | 8                | 1.917781                | 1.156036  | -0.377969 |
| 22               | 6                | -2.912443               | 1.445211  | 1.206383  |
| 23               | 6                | -2.363549               | 2.149681  | -0.026653 |
| 24               | 8                | -1.180495               | 1.876319  | -0.408557 |
| 25               | 1                | -0.240148               | -1.528212 | 3.942327  |
| 26               | 1                | -0.530463               | -3.214176 | 3.544846  |
| 27               | 1                | 1.290634                | -3.163398 | 1.854341  |
| 28               | 1                | 1.874981                | -2.754479 | 3.461560  |
| 29               | 1                | 1.453615                | -0.283592 | 3.961771  |
| 30               | 1                | 3.152065                | -0.567924 | 3.616260  |
| 31               | 1                | 3.154877                | 1.277297  | 1.950900  |
| 32               | 1                | 2.691077                | 1.838093  | 3.550920  |
| 33               | 1                | 0.234369                | 1.456441  | 3.986085  |
| 34               | 1                | 0.523040                | 3.151212  | 3.625837  |
| 35               | 1                | -1.291474               | 3.136694  | 1.930935  |
| 36               | 1                | -1.882313               | 2.683082  | 3.523763  |
| 37               | 1                | -1.466182               | 0.202215  | 3.962061  |
| 38               | 1                | -3.161658               | 0.496021  | 3.609159  |
| 39               | 1                | -3.152135               | -1.302991 | 1.896366  |
| 40               | 1                | -2.699595               | -1.908190 | 3.483268  |
| 41               | 1                | -0.539340               | -3.389627 | 0.797636  |
| 42               | 1                | 3.420285                | -0.529211 | 0.887502  |
| 43               | 1                | 0.547961                | 3.385411  | 0.883643  |
| 44               | 1                | -3.401669               | 0.526000  | 0.871950  |
| 45               | 8                | -0.017692               | -0.108990 | -2.077183 |
| 46               | 1                | 0.564409                | -0.877690 | -2.216621 |
| 47               | 1                | -0.915664               | -0.439087 | -2.255096 |
| 48               | 7                | -3.143223               | 2.999434  | -0.654658 |
| 49               | 7                | 3.025302                | 3.126781  | -0.634913 |
| 50               | 7                | 3.202887                | -2.962543 | -0.698231 |
| 51               | 7                | -3.054920               | -3.107482 | -0.681226 |
| 52               | 1                | -4.105483               | 3.261877  | -0.361539 |
| 53               | 1                | 3.280897                | 4.091805  | -0.345268 |
| 54               | 1                | 4.154755                | -3.243321 | -0.383551 |
| 55               | 1                | -3.344403               | -4.060636 | -0.378413 |
| 56               | 6                | -3.817686               | -2.796029 | -1.883670 |
| 57               | 1                | -3.152224               | -2.628203 | -2.736600 |
| 58               | 6                | -2.857707               | 3.721975  | -1.887795 |



|    |    |           |           |           |
|----|----|-----------|-----------|-----------|
| 59 | 1  | -2.637332 | 3.026951  | -2.704124 |
| 60 | 6  | 3.759985  | 2.836730  | -1.859761 |
| 61 | 1  | 3.073144  | 2.611692  | -2.681704 |
| 62 | 6  | 2.945651  | -3.667705 | -1.947763 |
| 63 | 1  | 2.780570  | -2.961848 | -2.768217 |
| 64 | 1  | -4.420516 | -1.894194 | -1.738700 |
| 65 | 1  | -1.992849 | 4.380959  | -1.760628 |
| 66 | 1  | 4.419063  | 1.973525  | -1.722268 |
| 67 | 1  | 2.059005  | -4.303316 | -1.860373 |
| 68 | 6  | -4.142274 | 4.559573  | -2.206735 |
| 69 | 8  | -5.080593 | 4.426015  | -1.360234 |
| 70 | 8  | -4.096182 | 5.254801  | -3.243148 |
| 71 | 6  | 4.598796  | 4.120953  | -2.176845 |
| 72 | 8  | 4.453359  | 5.064448  | -1.338136 |
| 73 | 8  | 5.306605  | 4.069613  | -3.204522 |
| 74 | 6  | 4.221899  | -4.535119 | -2.221960 |
| 75 | 8  | 4.197001  | -5.228863 | -3.259370 |
| 76 | 8  | 5.132065  | -4.420308 | -1.342532 |
| 77 | 6  | -4.736494 | -4.038852 | -2.143016 |
| 78 | 8  | -4.596863 | -4.978630 | -1.298910 |
| 79 | 8  | -5.489258 | -3.963349 | -3.135957 |
| 80 | 66 | 0.010484  | 0.011491  | 0.425251  |
| 81 | 1  | -2.066781 | -3.675537 | 1.656415  |
| 82 | 1  | 3.670433  | -2.084061 | 1.708092  |
| 83 | 1  | 2.081089  | 3.644636  | 1.740925  |
| 84 | 1  | -3.659286 | 2.062360  | 1.723252  |

E(RTPSSh) = -2391.0642526 Hartree

Zero-point correction = 0.669323 Hartree/particle

Sum of electronic and thermal Energies = -2390.347727 Hartree

Sum of electronic and thermal Enthalpies = -2390.346783 Hartree

Sum of electronic and thermal Free Energies = -2390.480435 Hartree

**Table S82.** [Ho(DOTA-(gly)<sub>4</sub>(H<sub>2</sub>O))<sup>-</sup> [TSAP, Δ(δδδδ)], TPSSh/LCRECP/6-31G(d,p), aqueous solution (0 Imaginary Frequencies)

| Center Number | Atomic Number | Coordinates (Angstroms) |           |           |
|---------------|---------------|-------------------------|-----------|-----------|
|               |               | X                       | Y         | Z         |
| 1             | 7             | -1.109895               | -1.790774 | 2.057366  |
| 2             | 6             | -0.193486               | -2.256302 | 3.132723  |
| 3             | 6             | 1.239455                | -2.402260 | 2.641634  |
| 4             | 7             | 1.777462                | -1.129092 | 2.076173  |
| 5             | 6             | 2.206427                | -0.225928 | 3.177918  |
| 6             | 6             | 2.366129                | 1.213999  | 2.710643  |
| 7             | 7             | 1.109951                | 1.758178  | 2.112685  |
| 8             | 6             | 0.187661                | 2.199669  | 3.192761  |
| 9             | 6             | -1.243426               | 2.353374  | 2.698039  |
| 10            | 7             | -1.774489               | 1.093852  | 2.095908  |
| 11            | 6             | -2.214269               | 0.163533  | 3.169218  |
| 12            | 6             | -2.370378               | -1.262806 | 2.661198  |
| 13            | 6             | -1.457622               | -2.908739 | 1.148561  |
| 14            | 6             | -2.171216               | -2.337047 | -0.066914 |
| 15            | 8             | -1.879916               | -1.151741 | -0.437234 |
| 16            | 6             | 2.922778                | -1.456543 | 1.195594  |
| 17            | 6             | 2.394843                | -2.127599 | -0.063048 |
| 18            | 8             | 1.213541                | -1.844596 | -0.454311 |
| 19            | 6             | 1.463352                | 2.890435  | 1.223998  |
| 20            | 6             | 2.172080                | 2.331515  | -0.003039 |
| 21            | 8             | 1.910868                | 1.140098  | -0.366091 |
| 22            | 6             | -2.907251               | 1.443204  | 1.206920  |

|    |    |           |           |           |
|----|----|-----------|-----------|-----------|
| 23 | 6  | -2.350893 | 2.143914  | -0.024522 |
| 24 | 8  | -1.164970 | 1.869464  | -0.396816 |
| 25 | 1  | -0.242430 | -1.530363 | 3.947779  |
| 26 | 1  | -0.533876 | -3.215457 | 3.546564  |
| 27 | 1  | 1.289542  | -3.163950 | 1.859734  |
| 28 | 1  | 1.873648  | -2.753619 | 3.466662  |
| 29 | 1  | 1.454373  | -0.285292 | 3.968176  |
| 30 | 1  | 3.152049  | -0.570500 | 3.618719  |
| 31 | 1  | 3.153314  | 1.275830  | 1.955758  |
| 32 | 1  | 2.688669  | 1.837286  | 3.555310  |
| 33 | 1  | 0.233915  | 1.456189  | 3.992148  |
| 34 | 1  | 0.523832  | 3.150330  | 3.629003  |
| 35 | 1  | -1.291989 | 3.135496  | 1.936592  |
| 36 | 1  | -1.883424 | 2.680050  | 3.528672  |
| 37 | 1  | -1.469420 | 0.201249  | 3.967650  |
| 38 | 1  | -3.163960 | 0.496228  | 3.610346  |
| 39 | 1  | -3.151976 | -1.303090 | 1.898753  |
| 40 | 1  | -2.699713 | -1.909737 | 3.485206  |
| 41 | 1  | -0.536971 | -3.384376 | 0.798046  |
| 42 | 1  | 3.414413  | -0.529056 | 0.889187  |
| 43 | 1  | 0.545398  | 3.379486  | 0.885506  |
| 44 | 1  | -3.397222 | 0.524517  | 0.872449  |
| 45 | 8  | -0.015624 | -0.094624 | -2.056095 |
| 46 | 1  | 0.559527  | -0.868188 | -2.197292 |
| 47 | 1  | -0.916437 | -0.416955 | -2.233822 |
| 48 | 7  | -3.125426 | 2.992142  | -0.660721 |
| 49 | 7  | 3.016173  | 3.109612  | -0.640643 |
| 50 | 7  | 3.184817  | -2.954651 | -0.704915 |
| 51 | 7  | -3.044231 | -3.091956 | -0.690366 |
| 52 | 1  | -4.089708 | 3.255639  | -0.375501 |
| 53 | 1  | 3.272145  | 4.076668  | -0.358367 |
| 54 | 1  | 4.139320  | -3.235447 | -0.398303 |
| 55 | 1  | -3.334301 | -4.047311 | -0.394942 |
| 56 | 6  | -3.803129 | -2.773070 | -1.893351 |
| 57 | 1  | -3.134995 | -2.600536 | -2.743267 |
| 58 | 6  | -2.830097 | 3.711320  | -1.893536 |
| 59 | 1  | -2.604246 | 3.013964  | -2.706358 |
| 60 | 6  | 3.747281  | 2.811307  | -1.865664 |
| 61 | 1  | 3.058012  | 2.580161  | -2.683836 |
| 62 | 6  | 2.918855  | -3.656306 | -1.954633 |
| 63 | 1  | 2.747686  | -2.948190 | -2.771902 |
| 64 | 1  | -4.406231 | -1.872002 | -1.744933 |
| 65 | 1  | -1.965623 | 4.369845  | -1.761567 |
| 66 | 1  | 4.407225  | 1.949426  | -1.724098 |
| 67 | 1  | 2.033158  | -4.292569 | -1.862708 |
| 68 | 6  | -4.111471 | 4.549164  | -2.224405 |
| 69 | 8  | -5.056490 | 4.418151  | -1.385044 |
| 70 | 8  | -4.056592 | 5.241951  | -3.262042 |
| 71 | 6  | 4.584463  | 4.093645  | -2.194473 |
| 72 | 8  | 4.441213  | 5.042938  | -1.361997 |
| 73 | 8  | 5.288913  | 4.035318  | -3.224096 |
| 74 | 6  | 4.193621  | -4.522176 | -2.240663 |
| 75 | 8  | 4.161150  | -5.213528 | -3.279439 |
| 76 | 8  | 5.110393  | -4.408599 | -1.367998 |
| 77 | 6  | -4.721206 | -4.014340 | -2.163002 |
| 78 | 8  | -4.583627 | -4.959344 | -1.324434 |
| 79 | 8  | -5.471219 | -3.932697 | -3.157503 |
| 80 | 67 | 0.010399  | 0.011564  | 0.438265  |
| 81 | 1  | -2.067678 | -3.670561 | 1.651453  |
| 82 | 1  | 3.663641  | -2.086679 | 1.705312  |
| 83 | 1  | 2.081176  | 3.638143  | 1.738773  |
| 84 | 1  | -3.654219 | 2.063340  | 1.719975  |

-----  
 E(RTPSSh) = -2391.6480766 Hartree  
 Zero-point correction = 0.669492 Hartree/particle  
 Sum of electronic and thermal Energies = -2390.931451 Hartree  
 Sum of electronic and thermal Enthalpies = -2390.930507 Hartree  
 Sum of electronic and thermal Free Energies = -2391.063757 Hartree

**Table S83.** [Er(DOTA-(gly)<sub>4</sub>(H<sub>2</sub>O))<sup>-</sup> [TSAP, Δ(δδδδ)], TPSSh/LCRECP/6-31G(d,p), aqueous solution (0 Imaginary Frequencies)

| Center<br>Number | Atomic<br>Number | Coordinates (Angstroms) |           |           |
|------------------|------------------|-------------------------|-----------|-----------|
|                  |                  | X                       | Y         | Z         |
| 1                | 7                | -1.103969               | -1.789551 | 2.062889  |
| 2                | 6                | -0.188452               | -2.254840 | 3.138842  |
| 3                | 6                | 1.244598                | -2.396983 | 2.647968  |
| 4                | 7                | 1.777153                | -1.122132 | 2.081292  |
| 5                | 6                | 2.207126                | -0.219110 | 3.182484  |
| 6                | 6                | 2.362231                | 1.220683  | 2.714248  |
| 7                | 7                | 1.103626                | 1.759052  | 2.116116  |
| 8                | 6                | 0.182395                | 2.201387  | 3.196512  |
| 9                | 6                | -1.248962               | 2.350714  | 2.702179  |
| 10               | 7                | -1.774909               | 1.088902  | 2.100442  |
| 11               | 6                | -2.215077               | 0.159647  | 3.174234  |
| 12               | 6                | -2.366775               | -1.266928 | 2.666404  |
| 13               | 6                | -1.448008               | -2.906313 | 1.151495  |
| 14               | 6                | -2.157876               | -2.331282 | -0.064249 |
| 15               | 8                | -1.870066               | -1.142154 | -0.425364 |
| 16               | 6                | 2.920195                | -1.447123 | 1.197096  |
| 17               | 6                | 2.386645                | -2.116108 | -0.059983 |
| 18               | 8                | 1.201356                | -1.836045 | -0.441687 |
| 19               | 6                | 1.453549                | 2.889234  | 1.223535  |
| 20               | 6                | 2.159239                | 2.325087  | -0.002580 |
| 21               | 8                | 1.900550                | 1.130122  | -0.355741 |
| 22               | 6                | -2.906109               | 1.434943  | 1.208388  |
| 23               | 6                | -2.345223               | 2.132220  | -0.022595 |
| 24               | 8                | -1.156012               | 1.859791  | -0.385925 |
| 25               | 1                | -0.239340               | -1.529675 | 3.954490  |
| 26               | 1                | -0.527613               | -3.214999 | 3.551291  |
| 27               | 1                | 1.296952                | -3.159214 | 1.866766  |
| 28               | 1                | 1.880597                | -2.745204 | 3.472884  |
| 29               | 1                | 1.456811                | -0.280100 | 3.974304  |
| 30               | 1                | 3.154396                | -0.561977 | 3.621000  |
| 31               | 1                | 3.149013                | 1.284397  | 1.959124  |
| 32               | 1                | 2.682542                | 1.846308  | 3.557984  |
| 33               | 1                | 0.230845                | 1.459519  | 3.997291  |
| 34               | 1                | 0.517401                | 3.153556  | 3.630274  |
| 35               | 1                | -1.300001               | 3.132476  | 1.940540  |
| 36               | 1                | -1.890414               | 2.675244  | 3.532478  |
| 37               | 1                | -1.471608               | 0.199624  | 3.973873  |
| 38               | 1                | -3.166196               | 0.491028  | 3.613196  |
| 39               | 1                | -3.147984               | -1.309625 | 1.903707  |
| 40               | 1                | -2.693893               | -1.915496 | 3.489963  |
| 41               | 1                | -0.526263               | -3.380882 | 0.802720  |
| 42               | 1                | 3.410555                | -0.519111 | 0.890551  |
| 43               | 1                | 0.534586                | 3.376696  | 0.885821  |
| 44               | 1                | -3.395067               | 0.515365  | 0.875190  |
| 45               | 8                | -0.014466               | -0.081962 | -2.036319 |
| 46               | 1                | 0.556257                | -0.858474 | -2.178968 |
| 47               | 1                | -0.917110               | -0.399536 | -2.213175 |
| 48               | 7                | -3.117824               | 2.975657  | -0.667280 |

|    |    |           |           |           |
|----|----|-----------|-----------|-----------|
| 49 | 7  | 2.998622  | 3.100955  | -0.648883 |
| 50 | 7  | 3.174318  | -2.938803 | -0.710016 |
| 51 | 7  | -3.024125 | -3.086007 | -0.697061 |
| 52 | 1  | -4.084551 | 3.237664  | -0.389153 |
| 53 | 1  | 3.252837  | 4.070619  | -0.374163 |
| 54 | 1  | 4.132041  | -3.217173 | -0.411292 |
| 55 | 1  | -3.311485 | -4.044414 | -0.408833 |
| 56 | 6  | -3.778318 | -2.763508 | -1.902092 |
| 57 | 1  | -3.106692 | -2.584049 | -2.747834 |
| 58 | 6  | -2.816419 | 3.690978  | -1.900899 |
| 59 | 1  | -2.584043 | 2.991094  | -2.709690 |
| 60 | 6  | 3.726603  | 2.795998  | -1.874152 |
| 61 | 1  | 3.035311  | 2.557383  | -2.688434 |
| 62 | 6  | 2.901256  | -3.638344 | -1.959424 |
| 63 | 1  | 2.722241  | -2.928872 | -2.773836 |
| 64 | 1  | -4.385668 | -1.865612 | -1.751902 |
| 65 | 1  | -1.954214 | 4.351864  | -1.766008 |
| 66 | 1  | 4.389241  | 1.936842  | -1.728691 |
| 67 | 1  | 2.018076  | -4.277342 | -1.862549 |
| 68 | 6  | -4.097537 | 4.524717  | -2.242920 |
| 69 | 8  | -5.047644 | 4.394442  | -1.409238 |
| 70 | 8  | -4.037531 | 5.213772  | -3.282767 |
| 71 | 6  | 4.559372  | 4.078157  | -2.214685 |
| 72 | 8  | 4.416354  | 5.032890  | -1.388445 |
| 73 | 8  | 5.260555  | 4.014345  | -3.246223 |
| 74 | 6  | 4.176466  | -4.499737 | -2.256851 |
| 75 | 8  | 4.138078  | -5.189222 | -3.296655 |
| 76 | 8  | 5.099536  | -4.384866 | -1.391039 |
| 77 | 6  | -4.690123 | -4.006972 | -2.182930 |
| 78 | 8  | -4.553057 | -4.955751 | -1.348572 |
| 79 | 8  | -5.435199 | -3.923094 | -3.180926 |
| 80 | 68 | 0.010093  | 0.012507  | 0.450496  |
| 81 | 1  | -2.059709 | -3.669117 | 1.650864  |
| 82 | 1  | 3.662660  | -2.078340 | 1.703083  |
| 83 | 1  | 2.072762  | 3.638574  | 1.734203  |
| 84 | 1  | -3.654230 | 2.056705  | 1.717744  |

E(RTPSSh) = -2392.2309506 Hartree

Zero-point correction = 0.669633 Hartree/particle

Sum of electronic and thermal Energies = -2391.514239 Hartree

Sum of electronic and thermal Enthalpies = -2391.513295 Hartree

Sum of electronic and thermal Free Energies = -2391.646308 Hartree

**Table S84.** [Tm(DOTA-(gly)<sub>4</sub>(H<sub>2</sub>O)]<sup>-</sup> [TSAP, Δ(δδδδ)], TPSSh/LCRECP/6-31G(d,p), aqueous solution (0 Imaginary Frequencies)

| Center Number | Atomic Number | Coordinates (Angstroms) |           |          |
|---------------|---------------|-------------------------|-----------|----------|
|               |               | X                       | Y         | Z        |
| 1             | 7             | -1.094948               | -1.790110 | 2.069052 |
| 2             | 6             | -0.179157               | -2.252268 | 3.145838 |
| 3             | 6             | 1.254368                | -2.387702 | 2.655258 |
| 4             | 7             | 1.778894                | -1.110419 | 2.086756 |
| 5             | 6             | 2.207304                | -0.205857 | 3.187018 |
| 6             | 6             | 2.354733                | 1.233952  | 2.717183 |
| 7             | 7             | 1.092691                | 1.763799  | 2.118739 |
| 8             | 6             | 0.171369                | 2.205055  | 3.199261 |
| 9             | 6             | -1.260601               | 2.346582  | 2.705219 |
| 10            | 7             | -1.778673               | 1.081189  | 2.104289 |
| 11            | 6             | -2.217065               | 0.152297  | 3.178860 |
| 12            | 6             | -2.361143               | -1.275122 | 2.671881 |

|    |   |           |           |           |
|----|---|-----------|-----------|-----------|
| 13 | 6 | -1.432837 | -2.907176 | 1.155971  |
| 14 | 6 | -2.140141 | -2.331519 | -0.060669 |
| 15 | 8 | -1.858980 | -1.138341 | -0.413696 |
| 16 | 6 | 2.920858  | -1.430888 | 1.199701  |
| 17 | 6 | 2.384181  | -2.099588 | -0.055926 |
| 18 | 8 | 1.194702  | -1.825643 | -0.429235 |
| 19 | 6 | 1.436863  | 2.892533  | 1.222172  |
| 20 | 6 | 2.141090  | 2.324673  | -0.002806 |
| 21 | 8 | 1.887803  | 1.125757  | -0.346299 |
| 22 | 6 | -2.909104 | 1.421110  | 1.209075  |
| 23 | 6 | -2.345543 | 2.115719  | -0.021891 |
| 24 | 8 | -1.152708 | 1.848008  | -0.376833 |
| 25 | 1 | -0.233673 | -1.527568 | 3.961715  |
| 26 | 1 | -0.514754 | -3.213995 | 3.557485  |
| 27 | 1 | 1.310740  | -3.150830 | 1.875220  |
| 28 | 1 | 1.892783  | -2.730931 | 3.480347  |
| 29 | 1 | 1.458673  | -0.269828 | 3.980257  |
| 30 | 1 | 3.156892  | -0.544498 | 3.623722  |
| 31 | 1 | 3.141012  | 1.300934  | 1.961825  |
| 32 | 1 | 2.671507  | 1.862808  | 3.559794  |
| 33 | 1 | 0.223711  | 1.465168  | 4.001676  |
| 34 | 1 | 0.502866  | 3.159628  | 3.630332  |
| 35 | 1 | -1.315902 | 3.127654  | 1.943171  |
| 36 | 1 | -1.904162 | 2.667791  | 3.535119  |
| 37 | 1 | -1.475186 | 0.196589  | 3.979808  |
| 38 | 1 | -3.170416 | 0.480278  | 3.615455  |
| 39 | 1 | -3.141893 | -1.322399 | 1.908987  |
| 40 | 1 | -2.684650 | -1.925493 | 3.495399  |
| 41 | 1 | -0.508976 | -3.379106 | 0.809474  |
| 42 | 1 | 3.408133  | -0.501427 | 0.892904  |
| 43 | 1 | 0.515969  | 3.376514  | 0.885010  |
| 44 | 1 | -3.395193 | 0.499489  | 0.877598  |
| 45 | 8 | -0.013352 | -0.073194 | -2.020128 |
| 46 | 1 | 0.553208  | -0.852688 | -2.162842 |
| 47 | 1 | -0.917350 | -0.386716 | -2.196964 |
| 48 | 7 | -3.118089 | 2.952881  | -0.674639 |
| 49 | 7 | 2.974562  | 3.099952  | -0.657304 |
| 50 | 7 | 3.171895  | -2.916504 | -0.713024 |
| 51 | 7 | -2.997899 | -3.088527 | -0.702140 |
| 52 | 1 | -4.087512 | 3.211647  | -0.403105 |
| 53 | 1 | 3.225208  | 4.072524  | -0.389888 |
| 54 | 1 | 4.133090  | -3.190253 | -0.421324 |
| 55 | 1 | -3.279930 | -4.050503 | -0.420707 |
| 56 | 6 | -3.747509 | -2.764857 | -1.909769 |
| 57 | 1 | -3.072374 | -2.575593 | -2.750563 |
| 58 | 6 | -2.812330 | 3.664986  | -1.909086 |
| 59 | 1 | -2.572358 | 2.963098  | -2.713888 |
| 60 | 6 | 3.700618  | 2.789512  | -1.882379 |
| 61 | 1 | 3.008187  | 2.542195  | -2.693052 |
| 62 | 6 | 2.893997  | -3.614948 | -1.962020 |
| 63 | 1 | 2.705660  | -2.904773 | -2.773708 |
| 64 | 1 | -4.362550 | -1.872468 | -1.758038 |
| 65 | 1 | -1.953595 | 4.329826  | -1.771487 |
| 66 | 1 | 4.367294  | 1.934221  | -1.732601 |
| 67 | 1 | 2.014911  | -4.258828 | -1.860382 |
| 68 | 6 | -4.094709 | 4.492360  | -2.261640 |
| 69 | 8 | -5.049112 | 4.361458  | -1.433006 |
| 70 | 8 | -4.031259 | 5.177809  | -3.303672 |
| 71 | 6 | 4.527081  | 4.072710  | -2.234138 |
| 72 | 8 | 4.382291  | 5.032597  | -1.414236 |
| 73 | 8 | 5.225506  | 4.004617  | -3.267289 |
| 74 | 6 | 4.171698  | -4.468861 | -2.270073 |

|    |    |           |           |           |
|----|----|-----------|-----------|-----------|
| 75 | 8  | 4.129533  | -5.156774 | -3.310774 |
| 76 | 8  | 5.100358  | -4.350273 | -1.410775 |
| 77 | 6  | -4.648200 | -4.013556 | -2.203017 |
| 78 | 8  | -4.508423 | -4.966180 | -1.373535 |
| 79 | 8  | -5.388144 | -3.929453 | -3.204798 |
| 80 | 69 | 0.009325  | 0.013462  | 0.461491  |
| 81 | 1  | -2.044542 | -3.671871 | 1.652422  |
| 82 | 1  | 3.666087  | -2.061228 | 1.702654  |
| 83 | 1  | 2.055674  | 3.644936  | 1.728753  |
| 84 | 1  | -3.659696 | 2.043044  | 1.714530  |

E(RTPSSh) = -2392.8104773 Hartree

Zero-point correction = 0.669742 Hartree/particle

Sum of electronic and thermal Energies = -2392.093690 Hartree

Sum of electronic and thermal Enthalpies = -2392.092746 Hartree

Sum of electronic and thermal Free Energies = -2392.225725 Hartree

**Table S85.** [Yb(DOTA-(gly)<sub>4</sub>(H<sub>2</sub>O))<sup>-</sup>] [TSAP,  $\Delta(\delta\delta\delta\delta)$ ], TPSSh/LCRECP/6-31G(d,p), aqueous solution (0 Imaginary Frequencies)

| Center<br>Number | Atomic<br>Number | Coordinates (Angstroms) |           |           |
|------------------|------------------|-------------------------|-----------|-----------|
|                  |                  | X                       | Y         | Z         |
| 1                | 7                | -1.083885               | -1.789656 | 2.078282  |
| 2                | 6                | -0.167210               | -2.245994 | 3.156426  |
| 3                | 6                | 1.266837                | -2.373360 | 2.666182  |
| 4                | 7                | 1.781403                | -1.093724 | 2.094220  |
| 5                | 6                | 2.207029                | -0.185553 | 3.192233  |
| 6                | 6                | 2.345028                | 1.253705  | 2.718825  |
| 7                | 7                | 1.078952                | 1.772537  | 2.119406  |
| 8                | 6                | 0.156886                | 2.212720  | 3.199406  |
| 9                | 6                | -1.275742               | 2.344085  | 2.705395  |
| 10               | 7                | -1.784412               | 1.073714  | 2.107224  |
| 11               | 6                | -2.219334               | 0.145940  | 3.183840  |
| 12               | 6                | -2.354043               | -1.283039 | 2.679518  |
| 13               | 6                | -1.414265               | -2.908574 | 1.165117  |
| 14               | 6                | -2.119206               | -2.334787 | -0.053531 |
| 15               | 8                | -1.847075               | -1.137208 | -0.398856 |
| 16               | 6                | 2.922444                | -1.409223 | 1.204451  |
| 17               | 6                | 2.383044                | -2.079720 | -0.048811 |
| 18               | 8                | 1.188891                | -1.813668 | -0.413377 |
| 19               | 6                | 1.415859                | 2.899177  | 1.217577  |
| 20               | 6                | 2.119618                | 2.326917  | -0.005349 |
| 21               | 8                | 1.872793                | 1.123500  | -0.337681 |
| 22               | 6                | -2.914841               | 1.404823  | 1.208966  |
| 23               | 6                | -2.350045               | 2.096173  | -0.022950 |
| 24               | 8                | -1.153363               | 1.834303  | -0.369359 |
| 25               | 1                | -0.226277               | -1.520635 | 3.971409  |
| 26               | 1                | -0.497885               | -3.209090 | 3.568799  |
| 27               | 1                | 1.328117                | -3.138162 | 1.888168  |
| 28               | 1                | 1.908283                | -2.709816 | 3.491677  |
| 29               | 1                | 1.459987                | -0.252290 | 3.986784  |
| 30               | 1                | 3.159219                | -0.518162 | 3.627849  |
| 31               | 1                | 3.130673                | 1.323829  | 1.963102  |
| 32               | 1                | 2.657520                | 1.887359  | 3.559390  |
| 33               | 1                | 0.213981                | 1.475751  | 4.004217  |
| 34               | 1                | 0.483646                | 3.170520  | 3.626852  |
| 35               | 1                | -1.336068               | 3.123130  | 1.941658  |
| 36               | 1                | -1.921850               | 2.662602  | 3.534310  |
| 37               | 1                | -1.478746               | 0.196564  | 3.985643  |
| 38               | 1                | -3.175109               | 0.469763  | 3.618179  |

|    |    |           |           |           |
|----|----|-----------|-----------|-----------|
| 39 | 1  | -3.133987 | -1.336657 | 1.916228  |
| 40 | 1  | -2.673481 | -1.934599 | 3.503661  |
| 41 | 1  | -0.487764 | -3.377427 | 0.821815  |
| 42 | 1  | 3.405201  | -0.478010 | 0.896144  |
| 43 | 1  | 0.492299  | 3.377633  | 0.880127  |
| 44 | 1  | -3.396611 | 0.480026  | 0.880345  |
| 45 | 8  | -0.013273 | -0.067125 | -2.003621 |
| 46 | 1  | 0.549535  | -0.849611 | -2.144856 |
| 47 | 1  | -0.918514 | -0.376642 | -2.180796 |
| 48 | 7  | -3.124220 | 2.924455  | -0.684820 |
| 49 | 7  | 2.946209  | 3.101688  | -0.668921 |
| 50 | 7  | 3.171536  | -2.890117 | -0.712727 |
| 51 | 7  | -2.965252 | -3.096708 | -0.704479 |
| 52 | 1  | -4.096634 | 3.178965  | -0.419654 |
| 53 | 1  | 3.192722  | 4.077577  | -0.409566 |
| 54 | 1  | 4.137054  | -3.157142 | -0.428780 |
| 55 | 1  | -3.239144 | -4.063114 | -0.430096 |
| 56 | 6  | -3.708338 | -2.775416 | -1.916817 |
| 57 | 1  | -3.028331 | -2.573744 | -2.750770 |
| 58 | 6  | -2.816470 | 3.632330  | -1.921231 |
| 59 | 1  | -2.568973 | 2.927946  | -2.721562 |
| 60 | 6  | 3.671621  | 2.785428  | -1.892918 |
| 61 | 1  | 2.978960  | 2.529565  | -2.700734 |
| 62 | 6  | 2.890064  | -3.587876 | -1.961342 |
| 63 | 1  | 2.689757  | -2.877346 | -2.769847 |
| 64 | 1  | -4.335420 | -1.891328 | -1.765794 |
| 65 | 1  | -1.962108 | 4.302594  | -1.782864 |
| 66 | 1  | 4.342080  | 1.934012  | -1.738151 |
| 67 | 1  | 2.017250  | -4.239434 | -1.854731 |
| 68 | 6  | -4.101855 | 4.450769  | -2.283720 |
| 69 | 8  | -5.059517 | 4.317989  | -1.459108 |
| 70 | 8  | -4.037321 | 5.131812  | -3.328528 |
| 71 | 6  | 4.492070  | 4.069606  | -2.255184 |
| 72 | 8  | 4.344194  | 5.034768  | -1.442032 |
| 73 | 8  | 5.189417  | 3.996993  | -3.288726 |
| 74 | 6  | 4.172586  | -4.430324 | -2.281020 |
| 75 | 8  | 4.128681  | -5.115560 | -3.323363 |
| 76 | 8  | 5.106406  | -4.306321 | -1.428074 |
| 77 | 6  | -4.591469 | -4.033165 | -2.224589 |
| 78 | 8  | -4.448375 | -4.988112 | -1.398352 |
| 79 | 8  | -5.322820 | -3.952698 | -3.232924 |
| 80 | 70 | 0.007533  | 0.015465  | 0.472145  |
| 81 | 1  | -2.025450 | -3.675053 | 1.659526  |
| 82 | 1  | 3.671361  | -2.037241 | 1.704828  |
| 83 | 1  | 2.033110  | 3.656202  | 1.719151  |
| 84 | 1  | -3.668708 | 2.026374  | 1.710023  |

E(RTPSSh) = -2393.393626 Hartree

Zero-point correction = 0.669830 Hartree/particle

Sum of electronic and thermal Energies = -2392.676781 Hartree

Sum of electronic and thermal Enthalpies = -2392.675837 Hartree

Sum of electronic and thermal Free Energies = -2392.808797 Hartree

**Table S86.** [Lu(DOTA-(gly)<sub>4</sub>(H<sub>2</sub>O))<sup>-</sup>] [TSAP,  $\Delta(\delta\delta\delta\delta)$ ], TPSSh/LCRECP/6-31G(d,p), aqueous solution (0 Imaginary Frequencies)

| Center Number | Atomic Number | Coordinates (Angstroms) |           |          |
|---------------|---------------|-------------------------|-----------|----------|
|               |               | X                       | Y         | Z        |
| 1             | 7             | -1.067987               | -1.793740 | 2.084429 |
| 2             | 6             | -0.149079               | -2.243147 | 3.163420 |

|    |   |           |           |           |
|----|---|-----------|-----------|-----------|
| 3  | 6 | 1.285747  | -2.358996 | 2.673532  |
| 4  | 7 | 1.787871  | -1.075417 | 2.099368  |
| 5  | 6 | 2.208673  | -0.163817 | 3.196217  |
| 6  | 6 | 2.334064  | 1.275703  | 2.721004  |
| 7  | 7 | 1.062828  | 1.781357  | 2.121122  |
| 8  | 6 | 0.139124  | 2.217315  | 3.201277  |
| 9  | 6 | -1.294598 | 2.335861  | 2.708070  |
| 10 | 7 | -1.791120 | 1.060193  | 2.110885  |
| 11 | 6 | -2.220455 | 0.131230  | 3.188523  |
| 12 | 6 | -2.342981 | -1.298962 | 2.685292  |
| 13 | 6 | -1.388433 | -2.914355 | 1.170211  |
| 14 | 6 | -2.093159 | -2.343220 | -0.049561 |
| 15 | 8 | -1.832293 | -1.140903 | -0.387812 |
| 16 | 6 | 2.928732  | -1.382612 | 1.206842  |
| 17 | 6 | 2.388604  | -2.055243 | -0.044745 |
| 18 | 8 | 1.189220  | -1.800468 | -0.400704 |
| 19 | 6 | 1.389668  | 2.907428  | 1.215164  |
| 20 | 6 | 2.094244  | 2.334213  | -0.006680 |
| 21 | 8 | 1.858454  | 1.125714  | -0.328859 |
| 22 | 6 | -2.922256 | 1.380848  | 1.210073  |
| 23 | 6 | -2.358153 | 2.072349  | -0.021818 |
| 24 | 8 | -1.156784 | 1.820921  | -0.359983 |
| 25 | 1 | -0.214312 | -1.517914 | 3.978021  |
| 26 | 1 | -0.472751 | -3.208621 | 3.575684  |
| 27 | 1 | 1.353864  | -3.124641 | 1.896936  |
| 28 | 1 | 1.930603  | -2.687914 | 3.499352  |
| 29 | 1 | 1.463354  | -0.235986 | 3.991911  |
| 30 | 1 | 3.164127  | -0.488834 | 3.630322  |
| 31 | 1 | 3.118954  | 1.351869  | 1.965102  |
| 32 | 1 | 2.640584  | 1.913762  | 3.560382  |
| 33 | 1 | 0.202953  | 1.482580  | 4.007618  |
| 34 | 1 | 0.459096  | 3.178601  | 3.625932  |
| 35 | 1 | -1.362330 | 3.113969  | 1.944024  |
| 36 | 1 | -1.943541 | 2.648628  | 3.536900  |
| 37 | 1 | -1.481113 | 0.188865  | 3.990995  |
| 38 | 1 | -3.179202 | 0.448395  | 3.621134  |
| 39 | 1 | -3.122370 | -1.359900 | 1.921999  |
| 40 | 1 | -2.656356 | -1.953257 | 3.509545  |
| 41 | 1 | -0.458217 | -3.377269 | 0.829112  |
| 42 | 1 | 3.405007  | -0.448351 | 0.897902  |
| 43 | 1 | 0.462275  | 3.378518  | 0.878101  |
| 44 | 1 | -3.397287 | 0.452092  | 0.883032  |
| 45 | 8 | -0.012671 | -0.060316 | -1.989801 |
| 46 | 1 | 0.553447  | -0.840385 | -2.130720 |
| 47 | 1 | -0.916926 | -0.374533 | -2.163642 |
| 48 | 7 | -3.136862 | 2.889919  | -0.691425 |
| 49 | 7 | 2.910346  | 3.112472  | -0.678827 |
| 50 | 7 | 3.180652  | -2.856128 | -0.715723 |
| 51 | 7 | -2.927215 | -3.111225 | -0.708526 |
| 52 | 1 | -4.113110 | 3.135717  | -0.431935 |
| 53 | 1 | 3.147688  | 4.092577  | -0.426692 |
| 54 | 1 | 4.150482  | -3.114322 | -0.438241 |
| 55 | 1 | -3.191203 | -4.082106 | -0.440114 |
| 56 | 6 | -3.666865 | -2.793662 | -1.923972 |
| 57 | 1 | -2.984438 | -2.579300 | -2.752753 |
| 58 | 6 | -2.830697 | 3.596082  | -1.929232 |
| 59 | 1 | -2.572759 | 2.891151  | -2.725773 |
| 60 | 6 | 3.635127  | 2.795992  | -1.903167 |
| 61 | 1 | 2.942652  | 2.528058  | -2.707209 |
| 62 | 6 | 2.898450  | -3.554146 | -1.964028 |
| 63 | 1 | 2.686819  | -2.843967 | -2.769977 |
| 64 | 1 | -4.306476 | -1.918641 | -1.772772 |



|    |    |           |           |           |
|----|----|-----------|-----------|-----------|
| 65 | 1  | -1.983834 | 4.275558  | -1.789869 |
| 66 | 1  | 4.314944  | 1.952619  | -1.745318 |
| 67 | 1  | 2.032563  | -4.214238 | -1.853699 |
| 68 | 6  | -4.122836 | 4.399956  | -2.300451 |
| 69 | 8  | -5.082614 | 4.260830  | -1.479352 |
| 70 | 8  | -4.060757 | 5.077442  | -3.347697 |
| 71 | 6  | 4.441112  | 4.086403  | -2.275881 |
| 72 | 8  | 4.285808  | 5.054976  | -1.468200 |
| 73 | 8  | 5.136053  | 4.014590  | -3.311082 |
| 74 | 6  | 4.187178  | -4.383576 | -2.292895 |
| 75 | 8  | 4.143583  | -5.067360 | -3.336183 |
| 76 | 8  | 5.124791  | -4.252108 | -1.445265 |
| 77 | 6  | -4.531573 | -4.061333 | -2.243311 |
| 78 | 8  | -4.381690 | -5.018113 | -1.420441 |
| 79 | 8  | -5.257237 | -3.985444 | -3.256073 |
| 80 | 71 | 0.007043  | 0.016729  | 0.481936  |
| 81 | 1  | -1.996696 | -3.684779 | 1.662128  |
| 82 | 1  | 3.682688  | -2.006948 | 1.704267  |
| 83 | 1  | 2.003535  | 3.670053  | 1.712406  |
| 84 | 1  | -3.681081 | 1.999187  | 1.707624  |

E(RTPSSh) = -2393.9470345 Hartree

Zero-point correction = 0.669892 Hartree/particle

Sum of electronic and thermal Energies = -2393.230156 Hartree

Sum of electronic and thermal Enthalpies = -2393.229212 Hartree

Sum of electronic and thermal Free Energies = -2393.362131 Hartree

**Table S87.** [Gd(DOTA)(H<sub>2</sub>O)]<sup>-</sup> [SAP, Δ(λλλλ)], TPSSh/LCRECP/6-31G(d,p), aqueous solution (0 Imaginary Frequencies)

| Center Number | Atomic Number | Coordinates (Angstroms) |           |           |
|---------------|---------------|-------------------------|-----------|-----------|
|               |               | X                       | Y         | Z         |
| 1             | 7             | -1.026330               | -1.769162 | 1.187635  |
| 2             | 6             | 0.056250                | -2.581535 | 1.806477  |
| 3             | 6             | 1.243719                | -1.728570 | 2.240553  |
| 4             | 7             | 1.864260                | -0.976961 | 1.119874  |
| 5             | 6             | 2.704379                | 0.123900  | 1.665822  |
| 6             | 6             | 1.870627                | 1.325230  | 2.101333  |
| 7             | 7             | 1.064280                | 1.910242  | 0.999650  |
| 8             | 6             | -0.002327               | 2.777378  | 1.568951  |
| 9             | 6             | -1.180564               | 1.967246  | 2.102761  |
| 10            | 7             | -1.825852               | 1.117414  | 1.068737  |
| 11            | 6             | -2.652467               | 0.071008  | 1.728353  |
| 12            | 6             | -1.807235               | -1.086739 | 2.251649  |
| 13            | 6             | -1.908110               | -2.647558 | 0.377537  |
| 14            | 6             | -2.707827               | -1.922430 | -0.719401 |
| 15            | 8             | -2.133600               | -0.869067 | -1.221976 |
| 16            | 8             | -3.782403               | -2.409035 | -1.086221 |
| 17            | 6             | 2.696566                | -1.878571 | 0.282762  |
| 18            | 6             | 1.921341                | -2.690721 | -0.770707 |
| 19            | 8             | 2.418335                | -3.744602 | -1.180576 |
| 20            | 8             | 0.815921                | -2.151553 | -1.192590 |
| 21            | 6             | 1.926612                | 2.696631  | 0.080150  |
| 22            | 6             | 2.683166                | 1.847463  | -0.961146 |
| 23            | 8             | 3.754191                | 2.281523  | -1.404434 |
| 24            | 8             | 2.088796                | 0.756891  | -1.328889 |
| 25            | 6             | -2.671427               | 1.944146  | 0.169313  |
| 26            | 6             | -1.890440               | 2.662638  | -0.948611 |
| 27            | 8             | -2.348645               | 3.721060  | -1.397664 |
| 28            | 8             | -0.828255               | 2.049977  | -1.366347 |

|    |    |           |           |           |
|----|----|-----------|-----------|-----------|
| 29 | 1  | -1.260522 | -3.350794 | -0.155545 |
| 30 | 1  | -2.593294 | -3.223465 | 1.014261  |
| 31 | 1  | 3.296304  | -2.559461 | 0.902014  |
| 32 | 1  | 3.379776  | -1.245845 | -0.291671 |
| 33 | 1  | 2.638405  | 3.322061  | 0.635878  |
| 34 | 1  | 1.267536  | 3.351687  | -0.497629 |
| 35 | 1  | -3.360514 | 1.264760  | -0.341459 |
| 36 | 1  | -3.262633 | 2.675479  | 0.736935  |
| 37 | 1  | 0.379198  | -3.319627 | 1.070558  |
| 38 | 1  | -0.319904 | -3.136596 | 2.679304  |
| 39 | 1  | 1.990195  | -2.378648 | 2.723283  |
| 40 | 1  | 0.925124  | -1.006137 | 2.997044  |
| 41 | 1  | 3.297594  | -0.224743 | 2.524853  |
| 42 | 1  | 3.409816  | 0.423613  | 0.889319  |
| 43 | 1  | 2.541952  | 2.087049  | 2.527776  |
| 44 | 1  | 1.185837  | 1.030683  | 2.901512  |
| 45 | 1  | 0.393524  | 3.403610  | 2.382944  |
| 46 | 1  | -0.341250 | 3.451478  | 0.780752  |
| 47 | 1  | -0.845121 | 1.315824  | 2.914437  |
| 48 | 1  | -1.917487 | 2.658648  | 2.540494  |
| 49 | 1  | -3.373234 | -0.296174 | 0.995858  |
| 50 | 1  | -3.228915 | 0.494577  | 2.564789  |
| 51 | 1  | -1.103964 | -0.721471 | 3.005248  |
| 52 | 1  | -2.466811 | -1.806614 | 2.761124  |
| 53 | 64 | 0.002269  | 0.009593  | -0.547794 |
| 54 | 1  | -1.176955 | -0.820271 | -2.853689 |
| 55 | 8  | -0.242384 | -0.611968 | -3.071175 |
| 56 | 1  | 0.236391  | -1.437215 | -2.836619 |

E(RTPSSh) = -1557.8519089 Hartree

Zero-point correction = 0.449472 Hartree/particle

Sum of electronic and thermal Energies = -1557.373114 Hartree

Sum of electronic and thermal Enthalpies = -1557.372169 Hartree

Sum of electronic and thermal Free Energies = -1557.459884 Hartree

**Table S88.** [Gd(DOTA)(H<sub>2</sub>O)]<sup>-</sup> [TSAP,  $\Lambda(\lambda\lambda\lambda\lambda)$ ], TPSSh/LCRECP/6-31G(d,p), aqueous solution (0 Imaginary Frequencies)

| Center Number | Atomic Number | Coordinates (Angstroms) |           |           |
|---------------|---------------|-------------------------|-----------|-----------|
|               |               | X                       | Y         | Z         |
| 1             | 7             | -1.173496               | -1.691745 | 1.253317  |
| 2             | 6             | -1.986231               | -0.999227 | 2.282347  |
| 3             | 6             | -2.725706               | 0.205261  | 1.711720  |
| 4             | 7             | -1.806076               | 1.203393  | 1.104498  |
| 5             | 6             | -1.194786               | 2.048947  | 2.157233  |
| 6             | 6             | 0.048498                | 2.774014  | 1.655489  |
| 7             | 7             | 1.089136                | 1.839993  | 1.149318  |
| 8             | 6             | 1.847117                | 1.250175  | 2.278213  |
| 9             | 6             | 2.614155                | 0.002018  | 1.857706  |
| 10            | 7             | 1.726035                | -1.053283 | 1.302807  |
| 11            | 6             | 1.050392                | -1.787829 | 2.399123  |
| 12            | 6             | -0.160890               | -2.566778 | 1.900202  |
| 13            | 6             | -2.022691               | -2.525586 | 0.371256  |
| 14            | 6             | -1.277493               | -2.974658 | -0.899744 |
| 15            | 8             | -0.211041               | -2.285095 | -1.192152 |
| 16            | 6             | -2.569512               | 2.015532  | 0.127704  |
| 17            | 6             | -2.931621               | 1.195310  | -1.128840 |
| 18            | 8             | -2.198400               | 0.143971  | -1.333166 |
| 19            | 6             | 1.982021                | 2.584816  | 0.230445  |
| 20            | 6             | 1.274726                | 2.921117  | -1.098552 |

|    |    |           |           |           |
|----|----|-----------|-----------|-----------|
| 21 | 8  | 0.256132  | 2.170827  | -1.388405 |
| 22 | 6  | 2.544117  | -1.969595 | 0.475423  |
| 23 | 6  | 2.985336  | -1.318740 | -0.847758 |
| 24 | 8  | 2.276232  | -0.292172 | -1.224038 |
| 25 | 1  | -1.313979 | -0.679910 | 3.084018  |
| 26 | 1  | -2.713313 | -1.688890 | 2.737967  |
| 27 | 1  | -3.414685 | -0.122727 | 0.930300  |
| 28 | 1  | -3.332877 | 0.669976  | 2.503113  |
| 29 | 1  | -0.936705 | 1.402037  | 3.000847  |
| 30 | 1  | -1.916846 | 2.788018  | 2.536990  |
| 31 | 1  | -0.221603 | 3.438716  | 0.831842  |
| 32 | 1  | 0.454072  | 3.405369  | 2.460383  |
| 33 | 1  | 1.135132  | 1.003354  | 3.071206  |
| 34 | 1  | 2.550859  | 1.981823  | 2.703899  |
| 35 | 1  | 3.338393  | 0.260066  | 1.081726  |
| 36 | 1  | 3.184457  | -0.383781 | 2.716196  |
| 37 | 1  | 0.742103  | -1.058890 | 3.154022  |
| 38 | 1  | 1.747523  | -2.479767 | 2.896168  |
| 39 | 1  | 0.155045  | -3.303714 | 1.158384  |
| 40 | 1  | -0.608268 | -3.123069 | 2.737844  |
| 41 | 1  | -2.413619 | -3.405683 | 0.901608  |
| 42 | 1  | -2.872317 | -1.925621 | 0.034225  |
| 43 | 1  | -3.481814 | 2.434415  | 0.575573  |
| 44 | 1  | -1.939274 | 2.844634  | -0.206708 |
| 45 | 1  | 2.360950  | 3.506215  | 0.694762  |
| 46 | 1  | 2.837669  | 1.950452  | -0.018088 |
| 47 | 1  | 3.425683  | -2.331108 | 1.023617  |
| 48 | 1  | 1.933850  | -2.835825 | 0.204207  |
| 49 | 8  | 0.367032  | -0.486098 | -3.045638 |
| 50 | 1  | 0.131239  | -1.409371 | -2.802585 |
| 51 | 1  | 1.322926  | -0.430163 | -2.824388 |
| 52 | 64 | -0.004957 | 0.009227  | -0.482257 |
| 53 | 8  | -1.743366 | -3.908090 | -1.558656 |
| 54 | 8  | 3.926239  | -1.819853 | -1.469661 |
| 55 | 8  | 1.733431  | 3.836284  | -1.791503 |
| 56 | 8  | -3.850154 | 1.600945  | -1.849785 |

---

E(RTPSSh) = -1557.8543614 Hartree  
Zero-point correction = 0.449268 Hartree/particle  
Sum of electronic and thermal Energies = -1557.375798 Hartree  
Sum of electronic and thermal Enthalpies = -1557.374854 Hartree  
Sum of electronic and thermal Free Energies = -1557.462228 Hartree

## References

- (i) Cosentino, U.; Villa, A.; Pitea, D.; Moro, G.; Barone, V.; Maiocchi, A. *J. Am. Chem. Soc.* **2002**, *124*, 4901-4909.

- (ii) Aime, S.; Botta, M.; Garda, Z.; Kucera, B. E.; Tircso, G.; Young, V. G.; Woods, M. *Inorg. Chem.* **2011**, *50*, 7955-7965.
- (iii) Thompson, A. L.; Parker, D.; Fulton, D. A.; Howard, J. A. K.; Pandya, S. U.; Puschmann, H.; Senanayake, K.; Stenson, P. A.; Badari, A.; Botta, M.; Avedano, S.; Aime, S. *Dalton Trans.* **2006**, 5605-5616.
- (iv) Esteban-Gomez, D.; de Blas, A.; Rodríguez-Blas, T.; Helm, L.; Platas-Iglesias, C. *ChemPhysChem* **2012**, *13*, 3640-3650.
- (v) a) Dunand, F. A.; Aime, S.; Merbach, A. E. *J. Am. Chem. Soc.* **2000**, *122*, 1506-1512; b) Aime, S.; Barge, A.; Botta, M.; De Sousa, A. S.; Parker, D. *Angew. Chem. Int. Ed.* **1998**, *37*, 2673-2675.
- (vi) Woods, M.; Kovacs, Z.; Zhang, S.; Sherry, A. D. *Angew. Chem. Int. Ed.* **2003**, *42*, 5889-5892.
- (vii) Seitz, M.; Oliver, A. G.; Raymond, K. N. *J. Am. Chem. Soc.* **2007**, *46*, 351-353.
